# Supplementary material for: Restoring polyamines protects from age-induced memory impairment in an autophagy-dependent manner
Source: Springer Nature journal article supplement (doi:10.1038/nn.3512), 2013-09-01
Supplement: 41593_2013_BFnn3512_MOESM56_ESM.pdf [file 41593_2013_BFnn3512_MOESM56_ESM.pdf]

## Supplementary Material

for

### Restoring polyamines protects from age-induced memory impairment in an autophagy-dependent manner

Varun K. Gupta<sup>1,2</sup>, Lisa Scheunemann<sup>1</sup>, Tobias Eisenberg<sup>3</sup>, Sara Mertel<sup>1</sup>, Anuradha Bhukel<sup>1,2</sup>, Tom S. Koemans<sup>4</sup>, Jamie M. Kramer<sup>4</sup>, Karen S. Y. Liu<sup>1,2</sup>, Sabrina Schroeder<sup>3</sup>, Hendrik G. Stunnenberg<sup>5</sup>, Frank Sinner<sup>6,7</sup>, Christoph Magnes<sup>6</sup>, Thomas R. Pieber<sup>6,7</sup>, Shubham Dipt<sup>8</sup>, André Fiala<sup>8</sup>, Annette Schenck<sup>4</sup>, Martin Schwaerzel<sup>1</sup>, Frank Madeo<sup>3,#</sup> & Stephan J. Sigrist<sup>1,2,#</sup>.

<sup>1</sup>Institute for Biology/Genetics, Freie Universität, Takustrasse 6, 14195 Berlin, Germany.

<sup>2</sup>NeuroCure, Charité, Charitéplatz 1, 10117 Berlin, Germany.

<sup>3</sup>Institute of Molecular Biosciences, University of Graz, 8010 Graz, Austria.

<sup>4</sup>Department of Human Genetics, Nijmegen Centre for Molecular Life Sciences, Donders Institute for Brain, Cognition and Behaviour, Radboud University Nijmegen Medical Centre, Nijmegen, The Netherlands.

<sup>5</sup>Radboud University Nijmegen, Department of Molecular Biology, Nijmegen Centre for Molecular Life Sciences, Faculty of Science, Nijmegen, The Netherlands,

<sup>6</sup>Health Institute for Biomedicine and Health Sciences, Joanneum Research Forschungs GesmbH, Graz, Austria

<sup>7</sup>Division of Endocrinology and Metabolism, Dept. of Internal Medicine, Medical University of Graz, Austria

<sup>8</sup>Georg-August-Universität Göttingen, Molecular Neurobiology of Behavior, Julia-Lermontowa-Weg 3, 37077 Göttingen, Germany.

# Correspondence to [stephan.sigrist@fu-berlin.de](mailto:stephan.sigrist@fu-berlin.de) or [Frank.Madeo@uni-graz.at](mailto:Frank.Madeo@uni-graz.at)

**Fig. S1: Effect of spermidine feeding on spermine levels.**

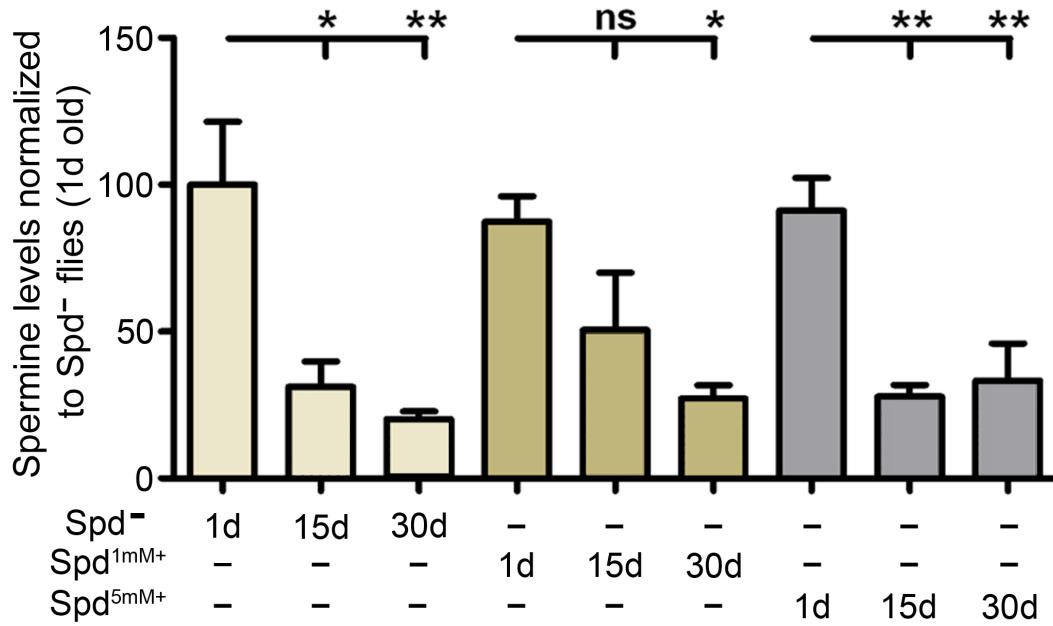

Endogenous level of Spermine in chronologically aging wild-type flies fed with food supplemented by 1 mM or 5mM spermidine (Spd<sup>1mM+</sup> or Spd<sup>5mM+</sup> respectively), compared with normal food (Spd<sup>-</sup>). Data are shown normalized to spermine levels of 1-day old (1d) flies on Spd<sup>-</sup> food (or Spd<sup>-</sup>, 1d; n=4 independent experiments; F=10.37 for Spd<sup>-</sup> flies, F=5.78 for Spd<sup>1mM+</sup> flies, F=12.31 for Spd<sup>5mM+</sup> flies; one-way-ANOVA with Bonferroni correction). \*:p<0.05; \*\*:p<0.01, ns: p>0.05, not significant; all values are mean ± SEM.

**Fig. S2: Effect of spermidine on 3d old wild-type flies trained with 2-electric shocks.**

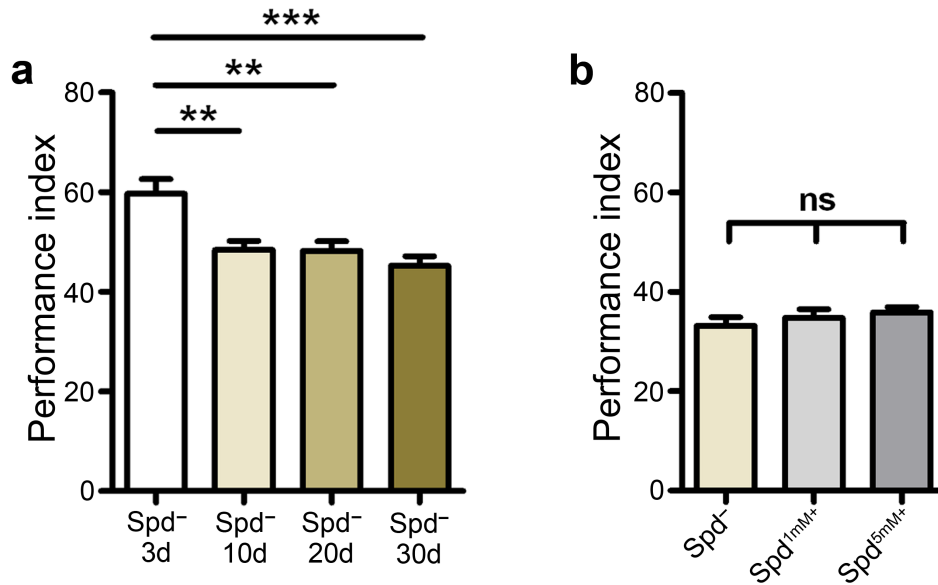

(a) Aversive olfactory-associative memory performance in 3-min after training (STM) deficit in chronologically aging wild-type ( $n=10$  independent experiments;  $F=8.50$ ; one-way-ANOVA with Bonferroni correction). (b) Short-term memory (STM) performance 3min after training (training under non-saturating conditions, 2-shocks instead of 12 electric-shocks) of 3d-  $Spd^{1mM+}$  and  $Spd^{5mM+}$  as compared to  $Spd^{-}$  flies with ( $n=8-9$  independent experiments;  $F=0.77$ ; one-way-ANOVA with Bonferroni correction). \*\*:  $p<0.01$ ; \*\*\*:  $p<0.001$ , ns:  $p>0.05$ , not significant; all values are mean  $\pm$  SEM.

**Fig. S3: Climbing ability of aged flies is not rescued by spermidine feeding.**

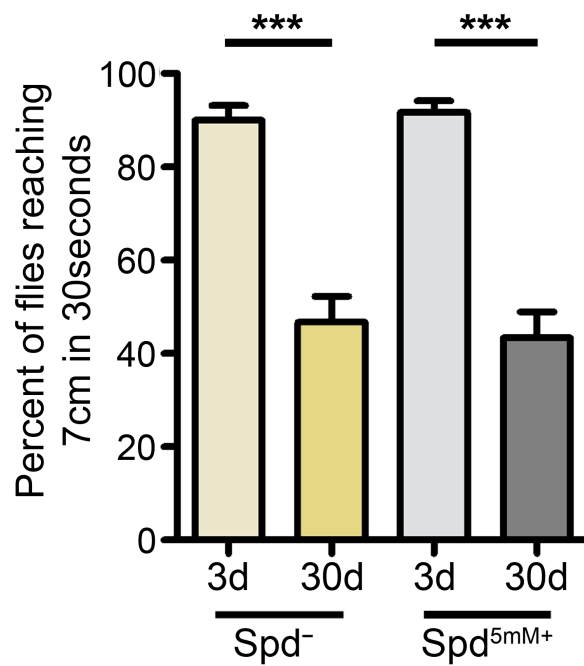

Climbing ability of aged Spd<sup>5mM+</sup> as compared to to Spd<sup>-</sup> flies (n=6 independent experiments; F=35.87; one-way-ANOVA with Bonferroni correction). \*\*\*:p<0.001, ns: p>0.05, not significant; all values are mean ± SEM.

**Fig. S4: Kinetics of age-related decline of polyamines.**

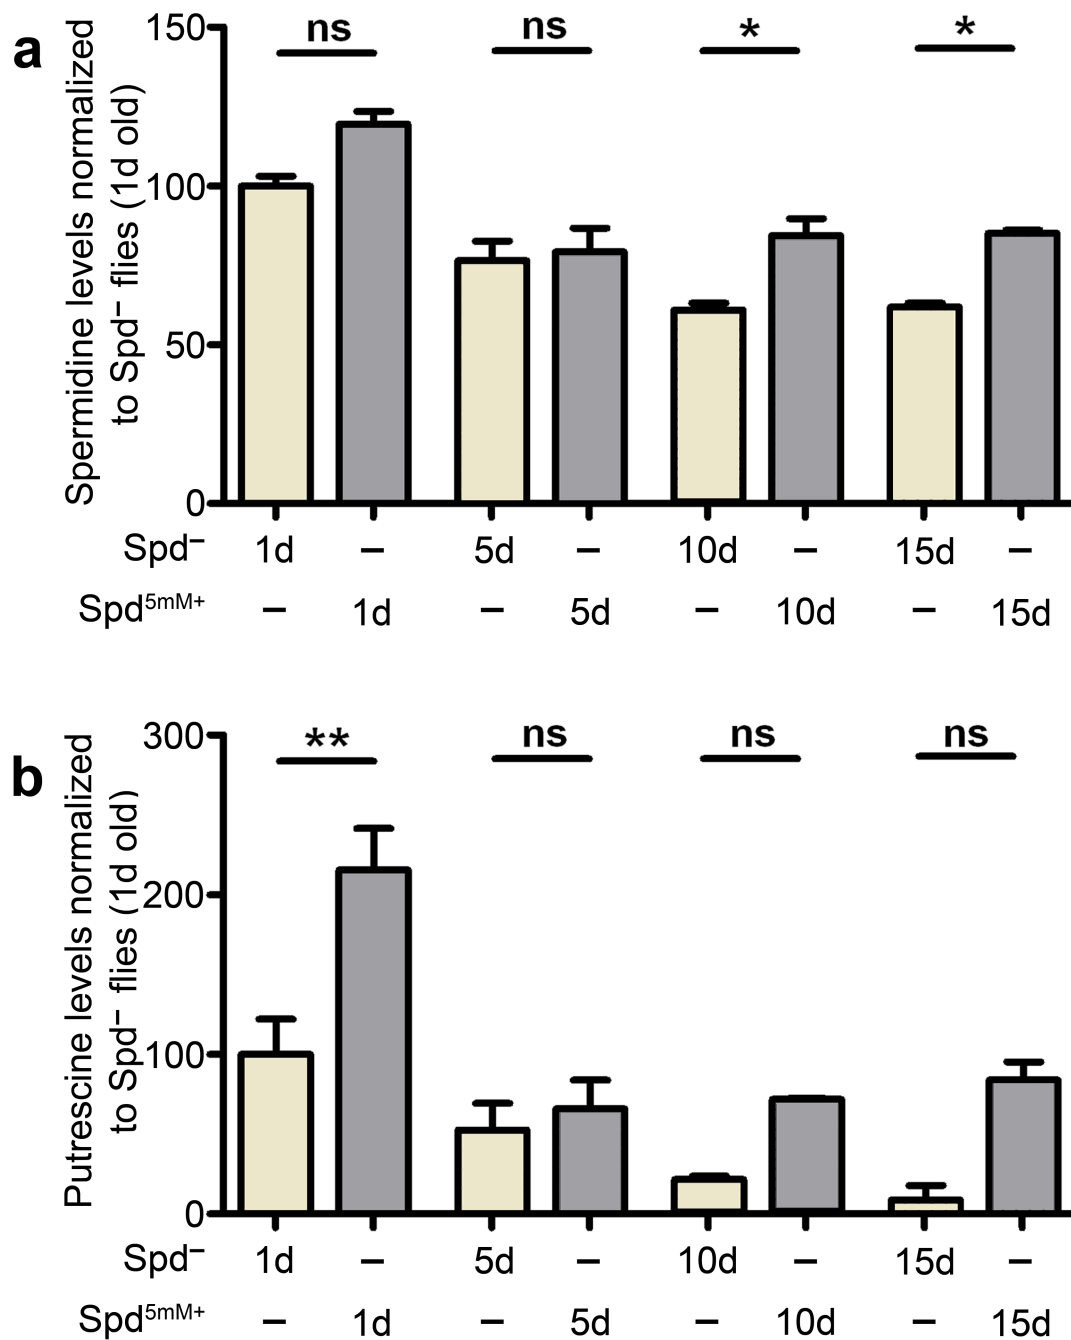

Level of Spermidine (a) and Putrescine (b) in chronologically aging wild-type flies fed with food supplemented with 5mM spermidine (Spd<sup>5mM+</sup>), and compared to age-matched control flies (Spd<sup>-</sup>). Data are shown normalized to the level of respective polyamines found in 1-day old (1d) flies on Spd<sup>-</sup> food (or Spd<sup>-</sup>, 1d; n=3 independent experiments; F=19.32 for (a) and F=16.31 for (b) respectively; one-way-ANOVA with Bonferroni correction). \*: p<0.05; ns: p>0.05, not significant; all values are mean ± SEM.

**Fig. S5: Graph of estimated dispersion versus base mean expression values.**

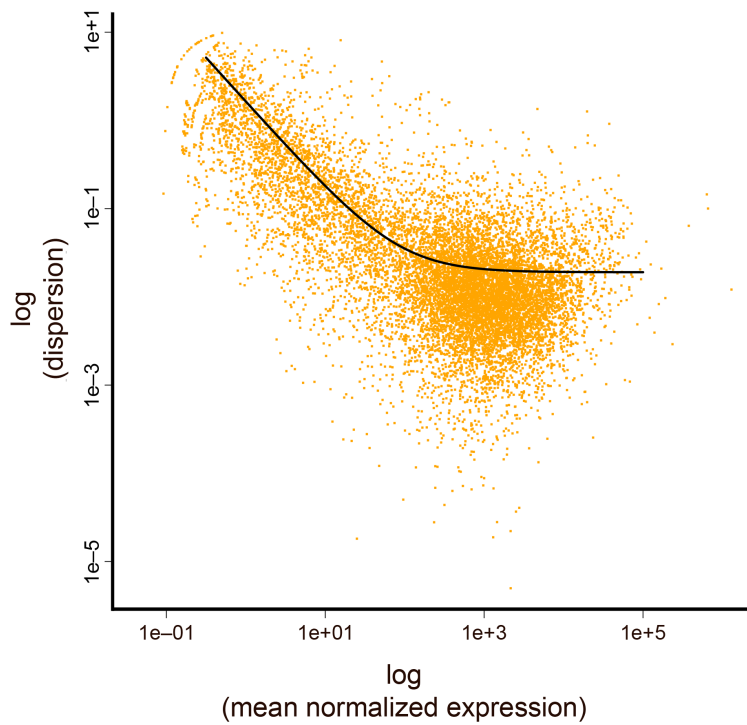

Per gene dispersion values (orange dots) and estimated dispersion values (black line) determined using DESeq, plotted against the base mean expression level. In cases where the per-gene dispersion was greater than estimated, we used the per-gene dispersion value to determine the probability of differential expression.

**Fig. S6: Changes in gene expression under spermidine treatment as determined by RNA-seq as well as quantitative real-time PCR (qPCR).**

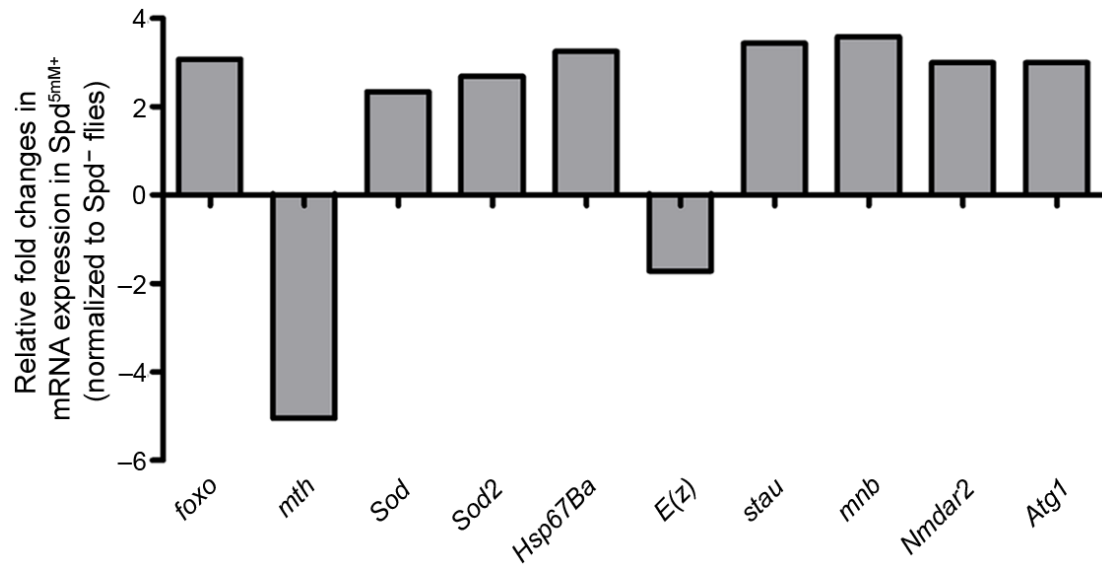

Several of the genes found to be modulated by spermidine feeding (by RNA-seq) were analyzed and validated by quantitative real-time PCR (qPCR; data represent the mean of two independent aging experiments for both 10 day old *Spd*<sup>5mM+</sup> as well as *Spd*<sup>-</sup> flies).

**Fig. S7: Mushroom-body specific expression of *Odc-1* in 3-day old flies.**

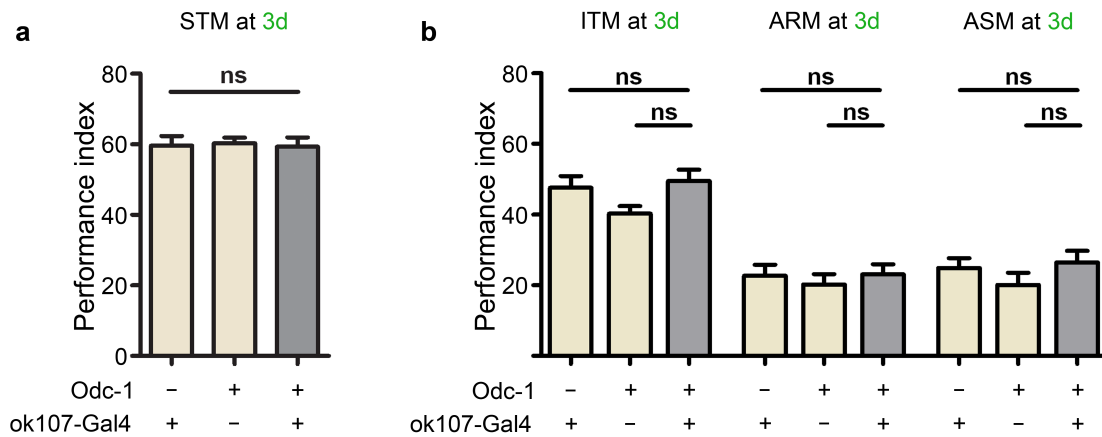

**(a)** Aversive associative memory performance in 3 min after training (STM) in 3 day-old female flies expressing *UAS-Odc-1* only in mushroom body ( $n=7-8$  independent experiments;  $F=0.05$ ; one-way-ANOVA with Bonferroni correction) **(b)** Aversive associative memory performance in 3hr after training (ITM), anesthesia-resistant memory (ARM) and anesthesia-sensitive memory (ASM) in 3 day-old female flies with *UAS-Odc-1* expressed specifically in mushroom body ( $n=7$  independent experiments;  $F=2.81$  for ITM,  $F=0.27$  for ARM,  $F=1.12$  for ASM; one-way-ANOVA with Bonferroni correction). ns:  $p>0.05$ , not significant; all values are mean  $\pm$  SEM.



**Fig. S8: Up-regulation of autophagy is not sufficient to suppress AMI.**

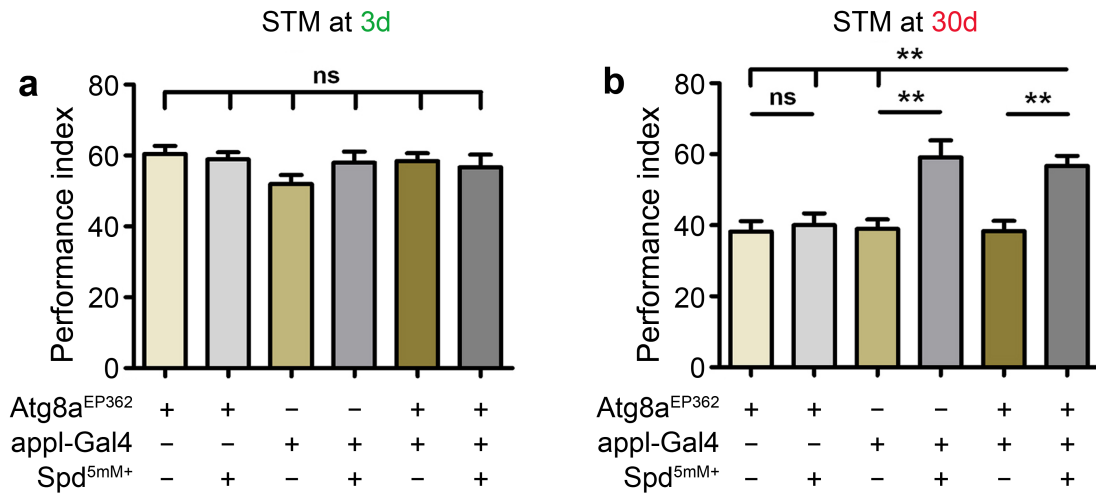

(a) Aversive associative memory performance in 3 min after training (STM) in 3d-female flies pan-neuronal expression of Atg8a (n=8 independent experiments; F=1.21; one-way-ANOVA with Bonferroni correction) (b) Pan-neuronal expression of Atg8a in a wild-type background (using appl-Gal4) did not suppress AMI in 30d-female flies (n=8 independent experiments; F=8.66; one-way-ANOVA with Bonferroni correction). \*\*:p<0.01; ns: p>0.05, not significant; all values are mean ± SEM.

**Fig. S9: Full-length image of the blots presented in the main figure 4.**

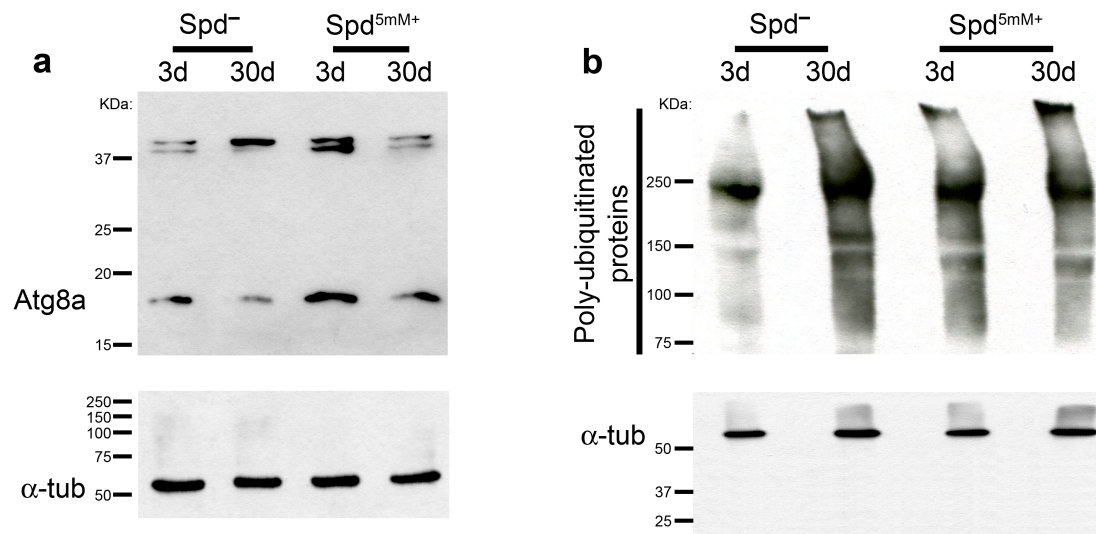

**Table S1: RNA-seq depth, alignment and mapping efficiency.**

|                                                      | <b>Spd<sup>-</sup></b> |                 | <b>Spd<sup>-</sup></b> |                  | <b>Spd<sup>5mM+</sup></b> |                 | <b>Spd<sup>5mM+</sup></b> |                  |
|------------------------------------------------------|------------------------|-----------------|------------------------|------------------|---------------------------|-----------------|---------------------------|------------------|
|                                                      | <b>3d-Rep 1</b>        | <b>3d-Rep 2</b> | <b>10d-Rep 1</b>       | <b>10d-Rep 2</b> | <b>3d-Rep 1</b>           | <b>3d-Rep 2</b> | <b>10d-Rep 1</b>          | <b>10d-Rep 2</b> |
| <b>Total reads</b>                                   | <b>30063143</b>        | <b>65849882</b> | <b>36497037</b>        | <b>29405330</b>  | <b>32092542</b>           | <b>32527880</b> | <b>28559644</b>           | <b>29135804</b>  |
| <b>% Aligned</b>                                     | <b>75%</b>             | <b>73%</b>      | <b>70%</b>             | <b>71%</b>       | <b>70%</b>                | <b>73%</b>      | <b>82%</b>                | <b>80%</b>       |
| <b>% Aligned reads mapped to exons</b>               | <b>96%</b>             | <b>97%</b>      | <b>95%</b>             | <b>96%</b>       | <b>96%</b>                | <b>96%</b>      | <b>97%</b>                | <b>97%</b>       |
| <b>% Aligned reads mapped unambiguously to exons</b> | <b>93%</b>             | <b>95%</b>      | <b>92%</b>             | <b>93%</b>       | <b>94%</b>                | <b>94%</b>      | <b>95%</b>                | <b>94%</b>       |
| <b># of reads mapped unambiguously to exons</b>      | <b>20982569</b>        | <b>45496989</b> | <b>23508654</b>        | <b>19551345</b>  | <b>21134655</b>           | <b>22296243</b> | <b>22142880</b>           | <b>22069666</b>  |

**Table S2: Raw data to Fig. 5-Transcriptome Analysis of aged Spd<sup>5mM+</sup> flies versus Spd<sup>-</sup> flies.**

**Table S2.1: Genes with altered expression in 3d Spd<sup>5mM+</sup> as compared to Spd<sup>-</sup> flies.**

| id          | baseMean | baseMeanA | baseMeanB | foldChange | log2FoldChange | p-value | padj  |
|-------------|----------|-----------|-----------|------------|----------------|---------|-------|
| FBgn0010401 | 48.476   | 96.353    | 0.599     | 0.006      | -7.330         | 0.004   | 0.029 |
| FBgn0010403 | 43.057   | 85.516    | 0.599     | 0.007      | -7.158         | 0.006   | 0.043 |
| FBgn0264353 | 31.504   | 62.427    | 0.580     | 0.009      | -6.749         | 0.000   | 0.000 |
| FBgn0034199 | 1493.850 | 2949.812  | 37.888    | 0.013      | -6.283         | 0.000   | 0.000 |
| FBgn0085209 | 462.447  | 911.995   | 12.899    | 0.014      | -6.144         | 0.000   | 0.000 |
| FBgn0035636 | 14.711   | 28.843    | 0.580     | 0.020      | -5.635         | 0.000   | 0.000 |
| FBgn0085334 | 72.667   | 142.357   | 2.976     | 0.021      | -5.580         | 0.000   | 0.000 |
| FBgn0039108 | 11.401   | 22.221    | 0.580     | 0.026      | -5.259         | 0.000   | 0.000 |
| FBgn0034627 | 49.830   | 96.721    | 2.939     | 0.030      | -5.040         | 0.000   | 0.000 |
| FBgn0085322 | 382.037  | 739.889   | 24.186    | 0.033      | -4.935         | 0.000   | 0.002 |
| FBgn0033547 | 198.090  | 382.608   | 13.572    | 0.035      | -4.817         | 0.000   | 0.000 |
| FBgn0262539 | 647.746  | 1248.768  | 46.724    | 0.037      | -4.740         | 0.000   | 0.000 |
| FBgn0050172 | 1256.406 | 2417.590  | 95.221    | 0.039      | -4.666         | 0.000   | 0.000 |
| FBgn0039237 | 7.395    | 14.209    | 0.580     | 0.041      | -4.613         | 0.007   | 0.045 |
| FBgn0263650 | 36.853   | 70.767    | 2.939     | 0.042      | -4.590         | 0.001   | 0.008 |
| FBgn0085285 | 7.237    | 13.875    | 0.599     | 0.043      | -4.534         | 0.001   | 0.013 |
| FBgn0250847 | 7.047    | 13.494    | 0.599     | 0.044      | -4.494         | 0.004   | 0.028 |
| FBgn0262881 | 215.046  | 411.802   | 18.290    | 0.044      | -4.493         | 0.000   | 0.000 |
| FBgn0051467 | 13.986   | 26.774    | 1.198     | 0.045      | -4.482         | 0.000   | 0.001 |
| FBgn0032847 | 183.195  | 350.478   | 15.912    | 0.045      | -4.461         | 0.000   | 0.000 |
| FBgn0011227 | 1708.025 | 3267.313  | 148.737   | 0.046      | -4.457         | 0.000   | 0.000 |
| FBgn0042206 | 84.103   | 160.643   | 7.564     | 0.047      | -4.409         | 0.000   | 0.000 |
| FBgn0034165 | 108.020  | 206.025   | 10.015    | 0.049      | -4.363         | 0.000   | 0.000 |
| FBgn0034945 | 86.751   | 164.759   | 8.743     | 0.053      | -4.236         | 0.000   | 0.000 |
| FBgn0262789 | 5.709    | 10.837    | 0.580     | 0.054      | -4.223         | 0.005   | 0.039 |
| FBgn0263476 | 5.740    | 10.881    | 0.599     | 0.055      | -4.183         | 0.001   | 0.010 |
| FBgn0040972 | 328.875  | 620.813   | 36.937    | 0.059      | -4.071         | 0.000   | 0.000 |
| FBgn0032193 | 168.305  | 317.704   | 18.907    | 0.060      | -4.071         | 0.000   | 0.000 |

|             |          |           |          |       |        |       |       |
|-------------|----------|-----------|----------|-------|--------|-------|-------|
| FBgn0033134 | 496.203  | 936.203   | 56.203   | 0.060 | -4.058 | 0.000 | 0.000 |
| FBgn0036145 | 1203.290 | 2269.791  | 136.789  | 0.060 | -4.053 | 0.000 | 0.000 |
| FBgn0259991 | 30.921   | 58.304    | 3.538    | 0.061 | -4.043 | 0.000 | 0.000 |
| FBgn0033527 | 54.897   | 103.335   | 6.459    | 0.063 | -4.000 | 0.000 | 0.000 |
| FBgn0052068 | 955.731  | 1798.879  | 112.584  | 0.063 | -3.998 | 0.000 | 0.000 |
| FBgn0259831 | 9.750    | 18.339    | 1.161    | 0.063 | -3.982 | 0.000 | 0.004 |
| FBgn0000594 | 14.223   | 26.685    | 1.760    | 0.066 | -3.923 | 0.000 | 0.002 |
| FBgn0032494 | 3156.407 | 5921.903  | 390.911  | 0.066 | -3.921 | 0.000 | 0.000 |
| FBgn0022224 | 126.809  | 237.836   | 15.783   | 0.066 | -3.914 | 0.000 | 0.000 |
| FBgn0035109 | 83.870   | 157.108   | 10.633   | 0.068 | -3.885 | 0.000 | 0.000 |
| FBgn0260004 | 128.442  | 240.335   | 16.548   | 0.069 | -3.860 | 0.000 | 0.000 |
| FBgn0040255 | 27.603   | 51.649    | 3.557    | 0.069 | -3.860 | 0.000 | 0.000 |
| FBgn0085279 | 153.436  | 286.898   | 19.975   | 0.070 | -3.844 | 0.000 | 0.000 |
| FBgn0037009 | 225.467  | 421.450   | 29.484   | 0.070 | -3.837 | 0.000 | 0.000 |
| FBgn0031403 | 85.015   | 158.890   | 11.139   | 0.070 | -3.834 | 0.000 | 0.000 |
| FBgn0051189 | 52.661   | 98.320    | 7.002    | 0.071 | -3.812 | 0.000 | 0.000 |
| FBgn0035861 | 4.358    | 8.135     | 0.580    | 0.071 | -3.809 | 0.007 | 0.048 |
| FBgn0034198 | 741.892  | 1383.537  | 100.247  | 0.072 | -3.787 | 0.000 | 0.000 |
| FBgn0034232 | 90.654   | 168.914   | 12.393   | 0.073 | -3.769 | 0.000 | 0.000 |
| FBgn0037708 | 73.118   | 136.220   | 10.015   | 0.074 | -3.766 | 0.000 | 0.000 |
| FBgn0010039 | 314.984  | 586.572   | 43.396   | 0.074 | -3.757 | 0.000 | 0.000 |
| FBgn0037008 | 101.552  | 189.063   | 14.041   | 0.074 | -3.751 | 0.000 | 0.000 |
| FBgn0033354 | 8.517    | 15.855    | 1.179    | 0.074 | -3.749 | 0.000 | 0.001 |
| FBgn0033523 | 190.413  | 354.373   | 26.453   | 0.075 | -3.744 | 0.000 | 0.000 |
| FBgn0031610 | 24.932   | 46.382    | 3.483    | 0.075 | -3.735 | 0.000 | 0.000 |
| FBgn0030694 | 162.678  | 302.515   | 22.840   | 0.076 | -3.727 | 0.000 | 0.000 |
| FBgn0053307 | 302.115  | 561.451   | 42.779   | 0.076 | -3.714 | 0.000 | 0.000 |
| FBgn0033222 | 8.442    | 15.685    | 1.198    | 0.076 | -3.711 | 0.002 | 0.018 |
| FBgn0039836 | 20.769   | 38.580    | 2.958    | 0.077 | -3.705 | 0.000 | 0.000 |
| FBgn0260763 | 20.884   | 38.791    | 2.976    | 0.077 | -3.704 | 0.000 | 0.000 |
| FBgn0264350 | 20.532   | 38.125    | 2.939    | 0.077 | -3.697 | 0.000 | 0.005 |
| FBgn0031561 | 7981.156 | 14808.867 | 1153.444 | 0.078 | -3.682 | 0.000 | 0.000 |
| FBgn0039371 | 12.161   | 22.562    | 1.760    | 0.078 | -3.680 | 0.000 | 0.005 |
| FBgn0037789 | 79.802   | 147.884   | 11.720   | 0.079 | -3.657 | 0.000 | 0.000 |

|             |          |          |         |       |        |       |       |
|-------------|----------|----------|---------|-------|--------|-------|-------|
| FBgn0027073 | 447.801  | 829.384  | 66.218  | 0.080 | -3.647 | 0.000 | 0.000 |
| FBgn0033357 | 919.773  | 1703.281 | 136.264 | 0.080 | -3.644 | 0.000 | 0.000 |
| FBgn0085229 | 1508.099 | 2792.295 | 223.902 | 0.080 | -3.641 | 0.000 | 0.000 |
| FBgn0034481 | 11.739   | 21.718   | 1.760   | 0.081 | -3.625 | 0.001 | 0.007 |
| FBgn0000500 | 543.473  | 1004.026 | 82.921  | 0.083 | -3.598 | 0.000 | 0.000 |
| FBgn0050151 | 161.150  | 297.625  | 24.674  | 0.083 | -3.592 | 0.000 | 0.000 |
| FBgn0037818 | 125.425  | 231.547  | 19.302  | 0.083 | -3.584 | 0.000 | 0.000 |
| FBgn0040968 | 141.254  | 260.736  | 21.772  | 0.084 | -3.582 | 0.000 | 0.000 |
| FBgn0038420 | 832.859  | 1536.296 | 129.423 | 0.084 | -3.569 | 0.000 | 0.000 |
| FBgn0030684 | 7.453    | 13.746   | 1.161   | 0.084 | -3.566 | 0.006 | 0.042 |
| FBgn0085244 | 274.815  | 506.647  | 42.982  | 0.085 | -3.559 | 0.000 | 0.000 |
| FBgn0015299 | 153.294  | 282.365  | 24.223  | 0.086 | -3.543 | 0.000 | 0.000 |
| FBgn0051776 | 29.691   | 54.684   | 4.699   | 0.086 | -3.541 | 0.000 | 0.000 |
| FBgn0040512 | 578.968  | 1066.049 | 91.887  | 0.086 | -3.536 | 0.000 | 0.000 |
| FBgn0032637 | 11.158   | 20.537   | 1.778   | 0.087 | -3.530 | 0.003 | 0.026 |
| FBgn0034523 | 21.977   | 40.435   | 3.520   | 0.087 | -3.522 | 0.000 | 0.000 |
| FBgn0029672 | 36.440   | 67.001   | 5.878   | 0.088 | -3.511 | 0.000 | 0.000 |
| FBgn0040588 | 108.503  | 199.186  | 17.820  | 0.089 | -3.483 | 0.000 | 0.000 |
| FBgn0031873 | 116.680  | 214.095  | 19.265  | 0.090 | -3.474 | 0.000 | 0.000 |
| FBgn0031270 | 64.090   | 117.547  | 10.633  | 0.090 | -3.467 | 0.000 | 0.000 |
| FBgn0052196 | 17.640   | 32.340   | 2.939   | 0.091 | -3.460 | 0.000 | 0.000 |
| FBgn0033303 | 28.602   | 52.431   | 4.773   | 0.091 | -3.457 | 0.007 | 0.048 |
| FBgn0085302 | 17.147   | 31.374   | 2.921   | 0.093 | -3.425 | 0.000 | 0.001 |
| FBgn0032244 | 24.342   | 44.528   | 4.156   | 0.093 | -3.422 | 0.000 | 0.000 |
| FBgn0035998 | 92.188   | 168.464  | 15.912  | 0.094 | -3.404 | 0.000 | 0.000 |
| FBgn0034443 | 467.521  | 854.172  | 80.870  | 0.095 | -3.401 | 0.000 | 0.000 |
| FBgn0051014 | 6.924    | 12.650   | 1.198   | 0.095 | -3.401 | 0.003 | 0.025 |
| FBgn0039083 | 43.652   | 79.740   | 7.564   | 0.095 | -3.398 | 0.000 | 0.000 |
| FBgn0034833 | 6.819    | 12.439   | 1.198   | 0.096 | -3.376 | 0.007 | 0.045 |
| FBgn0039835 | 159.253  | 290.405  | 28.101  | 0.097 | -3.369 | 0.000 | 0.000 |
| FBgn0050197 | 3656.421 | 6663.757 | 649.085 | 0.097 | -3.360 | 0.000 | 0.000 |
| FBgn0037670 | 55.885   | 101.828  | 9.941   | 0.098 | -3.357 | 0.000 | 0.000 |
| FBgn0050105 | 13.182   | 23.987   | 2.377   | 0.099 | -3.335 | 0.000 | 0.003 |
| FBgn0031904 | 311.546  | 566.593  | 56.499  | 0.100 | -3.326 | 0.000 | 0.000 |

|             |           |           |          |       |        |       |       |
|-------------|-----------|-----------|----------|-------|--------|-------|-------|
| FBgn0034299 | 32.805    | 59.658    | 5.952    | 0.100 | -3.325 | 0.000 | 0.000 |
| FBgn0020416 | 677.731   | 1230.375  | 125.088  | 0.102 | -3.298 | 0.000 | 0.000 |
| FBgn0034512 | 7424.294  | 13459.372 | 1389.216 | 0.103 | -3.276 | 0.000 | 0.000 |
| FBgn0263604 | 131.041   | 237.389   | 24.693   | 0.104 | -3.265 | 0.004 | 0.028 |
| FBgn0042179 | 12.292    | 22.262    | 2.322    | 0.104 | -3.261 | 0.001 | 0.014 |
| FBgn0029950 | 459.473   | 831.666   | 87.280   | 0.105 | -3.252 | 0.000 | 0.000 |
| FBgn0052407 | 278.884   | 504.715   | 53.053   | 0.105 | -3.250 | 0.000 | 0.000 |
| FBgn0037345 | 49.216    | 89.015    | 9.416    | 0.106 | -3.241 | 0.000 | 0.000 |
| FBgn0031227 | 15.454    | 27.951    | 2.958    | 0.106 | -3.240 | 0.000 | 0.002 |
| FBgn0032253 | 40.430    | 73.112    | 7.749    | 0.106 | -3.238 | 0.000 | 0.000 |
| FBgn0035355 | 73.005    | 131.949   | 14.060   | 0.107 | -3.230 | 0.000 | 0.002 |
| FBgn0034027 | 157.641   | 284.804   | 30.479   | 0.107 | -3.224 | 0.000 | 0.000 |
| FBgn0037824 | 15.099    | 27.277    | 2.921    | 0.107 | -3.223 | 0.000 | 0.003 |
| FBgn0039355 | 45.522    | 82.227    | 8.818    | 0.107 | -3.221 | 0.000 | 0.000 |
| FBgn0030711 | 274.958   | 496.431   | 53.486   | 0.108 | -3.214 | 0.000 | 0.000 |
| FBgn0036255 | 57.113    | 103.050   | 11.176   | 0.108 | -3.205 | 0.000 | 0.000 |
| FBgn0262537 | 344.031   | 620.164   | 67.897   | 0.109 | -3.191 | 0.000 | 0.000 |
| FBgn0036696 | 35.592    | 64.126    | 7.058    | 0.110 | -3.184 | 0.000 | 0.000 |
| FBgn0037611 | 41.148    | 74.133    | 8.163    | 0.110 | -3.183 | 0.000 | 0.000 |
| FBgn0066084 | 29838.570 | 53749.695 | 5927.446 | 0.110 | -3.181 | 0.000 | 0.003 |
| FBgn0035159 | 29.452    | 53.044    | 5.860    | 0.110 | -3.178 | 0.000 | 0.000 |
| FBgn0052706 | 23.414    | 42.167    | 4.662    | 0.111 | -3.177 | 0.000 | 0.000 |
| FBgn0038919 | 46.634    | 83.870    | 9.398    | 0.112 | -3.158 | 0.000 | 0.000 |
| FBgn0261815 | 64.474    | 115.901   | 13.047   | 0.113 | -3.151 | 0.000 | 0.000 |
| FBgn0031753 | 300.727   | 539.540   | 61.914   | 0.115 | -3.123 | 0.000 | 0.000 |
| FBgn0036094 | 288.246   | 517.090   | 59.401   | 0.115 | -3.122 | 0.000 | 0.000 |
| FBgn0262477 | 549.368   | 985.195   | 113.541  | 0.115 | -3.117 | 0.000 | 0.000 |
| FBgn0028380 | 270.043   | 484.241   | 55.844   | 0.115 | -3.116 | 0.000 | 0.000 |
| FBgn0029942 | 426.891   | 765.039   | 88.744   | 0.116 | -3.108 | 0.000 | 0.000 |
| FBgn0032986 | 263.158   | 471.522   | 54.795   | 0.116 | -3.105 | 0.000 | 0.000 |
| FBgn0026417 | 14.203    | 25.430    | 2.976    | 0.117 | -3.095 | 0.000 | 0.002 |
| FBgn0033799 | 408.226   | 730.746   | 85.706   | 0.117 | -3.092 | 0.000 | 0.000 |
| FBgn0033261 | 162.497   | 290.847   | 34.146   | 0.117 | -3.090 | 0.000 | 0.000 |
| FBgn0040786 | 159.813   | 285.986   | 33.640   | 0.118 | -3.088 | 0.000 | 0.005 |

|             |          |          |         |       |        |       |       |
|-------------|----------|----------|---------|-------|--------|-------|-------|
| FBgn0040773 | 4056.251 | 7254.311 | 858.192 | 0.118 | -3.079 | 0.002 | 0.018 |
| FBgn0035356 | 105.694  | 188.999  | 22.390  | 0.118 | -3.077 | 0.000 | 0.000 |
| FBgn0035674 | 231.177  | 413.264  | 49.089  | 0.119 | -3.074 | 0.000 | 0.000 |
| FBgn0050033 | 498.872  | 891.612  | 106.132 | 0.119 | -3.071 | 0.001 | 0.011 |
| FBgn0036306 | 68.377   | 122.059  | 14.696  | 0.120 | -3.054 | 0.000 | 0.000 |
| FBgn0004911 | 21.899   | 39.080   | 4.717   | 0.121 | -3.050 | 0.000 | 0.001 |
| FBgn0033032 | 266.061  | 474.722  | 57.401  | 0.121 | -3.048 | 0.000 | 0.000 |
| FBgn0066292 | 43.274   | 77.205   | 9.342   | 0.121 | -3.047 | 0.000 | 0.000 |
| FBgn0038795 | 221.219  | 394.454  | 47.984  | 0.122 | -3.039 | 0.000 | 0.000 |
| FBgn0047135 | 1909.221 | 3403.691 | 414.751 | 0.122 | -3.037 | 0.000 | 0.000 |
| FBgn0085468 | 1116.164 | 1989.506 | 242.823 | 0.122 | -3.034 | 0.000 | 0.000 |
| FBgn0085339 | 72.511   | 129.146  | 15.875  | 0.123 | -3.024 | 0.000 | 0.000 |
| FBgn0085284 | 135.508  | 241.266  | 29.750  | 0.123 | -3.020 | 0.000 | 0.000 |
| FBgn0036192 | 58.734   | 104.512  | 12.955  | 0.124 | -3.012 | 0.000 | 0.000 |
| FBgn0034076 | 29.387   | 52.278   | 6.496   | 0.124 | -3.009 | 0.000 | 0.000 |
| FBgn0027074 | 82.375   | 146.516  | 18.234  | 0.124 | -3.006 | 0.000 | 0.000 |
| FBgn0034963 | 282.805  | 502.294  | 63.316  | 0.126 | -2.988 | 0.000 | 0.000 |
| FBgn0036820 | 443.418  | 786.792  | 100.043 | 0.127 | -2.975 | 0.000 | 0.000 |
| FBgn0062449 | 91.092   | 161.554  | 20.630  | 0.128 | -2.969 | 0.000 | 0.000 |
| FBgn0037935 | 311.007  | 551.547  | 70.466  | 0.128 | -2.968 | 0.000 | 0.000 |
| FBgn0038850 | 10.227   | 18.132   | 2.322   | 0.128 | -2.965 | 0.000 | 0.004 |
| FBgn0032205 | 67.649   | 119.928  | 15.369  | 0.128 | -2.964 | 0.000 | 0.000 |
| FBgn0034293 | 36.095   | 63.952   | 8.237   | 0.129 | -2.957 | 0.000 | 0.000 |
| FBgn0032248 | 112.893  | 199.989  | 25.798  | 0.129 | -2.955 | 0.000 | 0.000 |
| FBgn0063495 | 28.045   | 49.669   | 6.422   | 0.129 | -2.951 | 0.000 | 0.000 |
| FBgn0264718 | 168.958  | 299.127  | 38.790  | 0.130 | -2.947 | 0.000 | 0.001 |
| FBgn0038960 | 15.533   | 27.492   | 3.575   | 0.130 | -2.943 | 0.000 | 0.004 |
| FBgn0038083 | 58.169   | 102.913  | 13.424  | 0.130 | -2.939 | 0.000 | 0.000 |
| FBgn0034326 | 12.558   | 22.214   | 2.902   | 0.131 | -2.936 | 0.002 | 0.015 |
| FBgn0040373 | 17.597   | 31.074   | 4.119   | 0.133 | -2.916 | 0.000 | 0.005 |
| FBgn0037061 | 163.825  | 288.934  | 38.716  | 0.134 | -2.900 | 0.000 | 0.000 |
| FBgn0042174 | 1733.875 | 3055.283 | 412.466 | 0.135 | -2.889 | 0.000 | 0.000 |
| FBgn0037936 | 49.516   | 87.239   | 11.794  | 0.135 | -2.887 | 0.000 | 0.000 |
| FBgn0035335 | 296.708  | 522.702  | 70.713  | 0.135 | -2.886 | 0.000 | 0.000 |



|             |           |           |          |       |        |       |       |
|-------------|-----------|-----------|----------|-------|--------|-------|-------|
| FBgn0038395 | 75.984    | 133.808   | 18.160   | 0.136 | -2.881 | 0.000 | 0.003 |
| FBgn0058045 | 458.723   | 807.369   | 110.077  | 0.136 | -2.875 | 0.000 | 0.000 |
| FBgn0031419 | 24.319    | 42.796    | 5.841    | 0.136 | -2.873 | 0.000 | 0.000 |
| FBgn0040813 | 35664.994 | 62761.478 | 8568.511 | 0.137 | -2.873 | 0.000 | 0.000 |
| FBgn0025334 | 17.008    | 29.897    | 4.119    | 0.138 | -2.860 | 0.000 | 0.004 |
| FBgn0042129 | 51.325    | 90.201    | 12.448   | 0.138 | -2.857 | 0.000 | 0.000 |
| FBgn0031361 | 106.185   | 186.140   | 26.230   | 0.141 | -2.827 | 0.000 | 0.000 |
| FBgn0040256 | 54.453    | 95.445    | 13.461   | 0.141 | -2.826 | 0.000 | 0.000 |
| FBgn0033900 | 185.160   | 323.984   | 46.335   | 0.143 | -2.806 | 0.000 | 0.000 |
| FBgn0053260 | 39.667    | 69.393    | 9.941    | 0.143 | -2.803 | 0.000 | 0.001 |
| FBgn0035528 | 366.138   | 639.982   | 92.294   | 0.144 | -2.794 | 0.000 | 0.000 |
| FBgn0037696 | 93.287    | 163.004   | 23.569   | 0.145 | -2.790 | 0.000 | 0.000 |
| FBgn0010217 | 15306.005 | 26714.383 | 3897.627 | 0.146 | -2.777 | 0.000 | 0.000 |
| FBgn0051248 | 347.115   | 605.283   | 88.947   | 0.147 | -2.767 | 0.000 | 0.000 |
| FBgn0027780 | 121.466   | 211.632   | 31.300   | 0.148 | -2.757 | 0.000 | 0.000 |
| FBgn0014469 | 578.137   | 1007.104  | 149.170  | 0.148 | -2.755 | 0.000 | 0.000 |
| FBgn0263607 | 117.584   | 204.725   | 30.442   | 0.149 | -2.750 | 0.000 | 0.000 |
| FBgn0263967 | 11.338    | 19.738    | 2.939    | 0.149 | -2.747 | 0.001 | 0.011 |
| FBgn0053635 | 60.967    | 106.078   | 15.857   | 0.149 | -2.742 | 0.000 | 0.000 |
| FBgn0028546 | 615.004   | 1068.538  | 161.470  | 0.151 | -2.726 | 0.000 | 0.000 |
| FBgn0032034 | 119.838   | 208.185   | 31.491   | 0.151 | -2.725 | 0.000 | 0.000 |
| FBgn0026570 | 113.206   | 196.661   | 29.750   | 0.151 | -2.725 | 0.000 | 0.000 |
| FBgn0028697 | 4246.792  | 7374.969  | 1118.616 | 0.152 | -2.721 | 0.000 | 0.000 |
| FBgn0052373 | 17.903    | 31.071    | 4.736    | 0.152 | -2.714 | 0.001 | 0.011 |
| FBgn0053987 | 44.218    | 76.735    | 11.701   | 0.152 | -2.713 | 0.000 | 0.000 |
| FBgn0033754 | 11.157    | 19.357    | 2.958    | 0.153 | -2.710 | 0.000 | 0.006 |
| FBgn0027864 | 66.348    | 115.060   | 17.635   | 0.153 | -2.706 | 0.001 | 0.012 |
| FBgn0040392 | 15.467    | 26.815    | 4.119    | 0.154 | -2.703 | 0.000 | 0.006 |
| FBgn0031986 | 17.853    | 30.952    | 4.755    | 0.154 | -2.703 | 0.000 | 0.005 |
| FBgn0031558 | 271.825   | 471.220   | 72.430   | 0.154 | -2.702 | 0.000 | 0.000 |
| FBgn0037552 | 106.053   | 183.837   | 28.268   | 0.154 | -2.701 | 0.000 | 0.000 |
| FBgn0053108 | 164.804   | 285.668   | 43.940   | 0.154 | -2.701 | 0.000 | 0.000 |
| FBgn0038766 | 30.594    | 53.007    | 8.182    | 0.154 | -2.696 | 0.000 | 0.000 |
| FBgn0038363 | 131.156   | 227.116   | 35.196   | 0.155 | -2.690 | 0.000 | 0.000 |

|             |          |          |         |       |        |       |       |
|-------------|----------|----------|---------|-------|--------|-------|-------|
| FBgn0054039 | 162.122  | 280.452  | 43.791  | 0.156 | -2.679 | 0.000 | 0.000 |
| FBgn0259985 | 927.334  | 1603.492 | 251.176 | 0.157 | -2.674 | 0.000 | 0.000 |
| FBgn0034264 | 38.591   | 66.661   | 10.522  | 0.158 | -2.663 | 0.000 | 0.000 |
| FBgn0034438 | 141.782  | 244.757  | 38.808  | 0.159 | -2.657 | 0.000 | 0.003 |
| FBgn0039766 | 136.763  | 235.990  | 37.536  | 0.159 | -2.652 | 0.000 | 0.000 |
| FBgn0035089 | 342.221  | 590.184  | 94.257  | 0.160 | -2.646 | 0.000 | 0.000 |
| FBgn0051785 | 42.253   | 72.860   | 11.646  | 0.160 | -2.645 | 0.000 | 0.000 |
| FBgn0032124 | 31.991   | 55.147   | 8.836   | 0.160 | -2.642 | 0.000 | 0.000 |
| FBgn0050005 | 88.284   | 151.967  | 24.600  | 0.162 | -2.627 | 0.000 | 0.000 |
| FBgn0039356 | 27.080   | 46.597   | 7.564   | 0.162 | -2.623 | 0.000 | 0.000 |
| FBgn0038893 | 81.662   | 140.503  | 22.822  | 0.162 | -2.622 | 0.000 | 0.004 |
| FBgn0085218 | 49.900   | 85.833   | 13.967  | 0.163 | -2.619 | 0.001 | 0.011 |
| FBgn0051674 | 25.323   | 43.514   | 7.132   | 0.164 | -2.609 | 0.000 | 0.000 |
| FBgn0031563 | 302.625  | 519.372  | 85.879  | 0.165 | -2.596 | 0.000 | 0.002 |
| FBgn0083972 | 181.985  | 312.262  | 51.707  | 0.166 | -2.594 | 0.000 | 0.000 |
| FBgn0032746 | 347.033  | 594.541  | 99.525  | 0.167 | -2.579 | 0.000 | 0.000 |
| FBgn0015037 | 396.979  | 680.041  | 113.918 | 0.168 | -2.578 | 0.000 | 0.000 |
| FBgn0050055 | 585.146  | 1002.171 | 168.120 | 0.168 | -2.576 | 0.000 | 0.000 |
| FBgn0032791 | 56.636   | 96.891   | 16.382  | 0.169 | -2.564 | 0.000 | 0.000 |
| FBgn0034541 | 20.044   | 34.283   | 5.804   | 0.169 | -2.562 | 0.000 | 0.002 |
| FBgn0028664 | 394.469  | 674.495  | 114.443 | 0.170 | -2.559 | 0.000 | 0.000 |
| FBgn0053170 | 481.151  | 822.234  | 140.068 | 0.170 | -2.553 | 0.000 | 0.000 |
| FBgn0030480 | 30.137   | 51.475   | 8.799   | 0.171 | -2.548 | 0.000 | 0.000 |
| FBgn0034246 | 409.773  | 699.317  | 120.229 | 0.172 | -2.540 | 0.000 | 0.000 |
| FBgn0037150 | 117.519  | 200.459  | 34.579  | 0.172 | -2.535 | 0.000 | 0.000 |
| FBgn0032613 | 137.511  | 234.527  | 40.494  | 0.173 | -2.534 | 0.000 | 0.000 |
| FBgn0028707 | 23.722   | 40.442   | 7.002   | 0.173 | -2.530 | 0.000 | 0.001 |
| FBgn0000229 | 741.153  | 1261.788 | 220.519 | 0.175 | -2.516 | 0.000 | 0.000 |
| FBgn0028526 | 2660.403 | 4529.167 | 791.638 | 0.175 | -2.516 | 0.000 | 0.000 |
| FBgn0051159 | 104.379  | 177.663  | 31.096  | 0.175 | -2.514 | 0.000 | 0.000 |
| FBgn0051205 | 567.349  | 964.850  | 169.848 | 0.176 | -2.506 | 0.000 | 0.000 |
| FBgn0034729 | 21.570   | 36.682   | 6.459   | 0.176 | -2.506 | 0.000 | 0.003 |
| FBgn0032873 | 119.559  | 202.816  | 36.301  | 0.179 | -2.482 | 0.000 | 0.000 |
| FBgn0030704 | 172.976  | 293.361  | 52.591  | 0.179 | -2.480 | 0.000 | 0.000 |

|             |          |          |         |       |        |       |       |
|-------------|----------|----------|---------|-------|--------|-------|-------|
| FBgn0036359 | 369.876  | 627.266  | 112.486 | 0.179 | -2.479 | 0.000 | 0.000 |
| FBgn0039335 | 151.657  | 257.163  | 46.150  | 0.179 | -2.478 | 0.000 | 0.000 |
| FBgn0052182 | 15.337   | 25.974   | 4.699   | 0.181 | -2.467 | 0.005 | 0.035 |
| FBgn0250753 | 2372.804 | 4018.458 | 727.150 | 0.181 | -2.466 | 0.000 | 0.000 |
| FBgn0037661 | 21.311   | 36.090   | 6.533   | 0.181 | -2.466 | 0.001 | 0.007 |
| FBgn0050054 | 315.308  | 533.901  | 96.715  | 0.181 | -2.465 | 0.001 | 0.011 |
| FBgn0052221 | 207.667  | 351.622  | 63.711  | 0.181 | -2.464 | 0.000 | 0.000 |
| FBgn0058198 | 95.638   | 161.809  | 29.466  | 0.182 | -2.457 | 0.000 | 0.000 |
| FBgn0063493 | 93.013   | 157.362  | 28.663  | 0.182 | -2.457 | 0.000 | 0.003 |
| FBgn0026314 | 690.810  | 1167.195 | 214.425 | 0.184 | -2.445 | 0.000 | 0.000 |
| FBgn0032032 | 130.880  | 220.907  | 40.852  | 0.185 | -2.435 | 0.000 | 0.000 |
| FBgn0051111 | 28.146   | 47.474   | 8.818   | 0.186 | -2.429 | 0.000 | 0.001 |
| FBgn0035691 | 55.748   | 93.897   | 17.598  | 0.187 | -2.416 | 0.000 | 0.000 |
| FBgn0051371 | 22.388   | 37.699   | 7.076   | 0.188 | -2.413 | 0.000 | 0.001 |
| FBgn0039045 | 46.265   | 77.889   | 14.640  | 0.188 | -2.411 | 0.000 | 0.000 |
| FBgn0023000 | 44.883   | 75.521   | 14.245  | 0.189 | -2.406 | 0.000 | 0.000 |
| FBgn0034177 | 51.834   | 87.194   | 16.474  | 0.189 | -2.404 | 0.000 | 0.000 |
| FBgn0040780 | 52.065   | 87.582   | 16.548  | 0.189 | -2.404 | 0.000 | 0.000 |
| FBgn0038324 | 75.437   | 126.891  | 23.983  | 0.189 | -2.404 | 0.000 | 0.000 |
| FBgn0011762 | 20.493   | 34.453   | 6.533   | 0.190 | -2.399 | 0.000 | 0.003 |
| FBgn0002791 | 130.350  | 219.009  | 41.692  | 0.190 | -2.393 | 0.000 | 0.000 |
| FBgn0032215 | 138.245  | 232.273  | 44.217  | 0.190 | -2.393 | 0.004 | 0.030 |
| FBgn0023170 | 942.342  | 1583.215 | 301.469 | 0.190 | -2.393 | 0.000 | 0.000 |
| FBgn0004118 | 472.889  | 794.082  | 151.695 | 0.191 | -2.388 | 0.000 | 0.000 |
| FBgn0051105 | 18.204   | 30.567   | 5.841   | 0.191 | -2.388 | 0.006 | 0.041 |
| FBgn0032728 | 40.241   | 67.545   | 12.936  | 0.192 | -2.384 | 0.000 | 0.000 |
| FBgn0013746 | 378.353  | 634.687  | 122.019 | 0.192 | -2.379 | 0.000 | 0.000 |
| FBgn0041336 | 21.694   | 36.386   | 7.002   | 0.192 | -2.377 | 0.001 | 0.009 |
| FBgn0031693 | 172.913  | 289.926  | 55.900  | 0.193 | -2.375 | 0.000 | 0.000 |
| FBgn0037309 | 182.490  | 305.931  | 59.049  | 0.193 | -2.373 | 0.000 | 0.000 |
| FBgn0028422 | 30.969   | 51.904   | 10.034  | 0.193 | -2.371 | 0.000 | 0.001 |
| FBgn0259992 | 135.982  | 227.876  | 44.088  | 0.193 | -2.370 | 0.000 | 0.000 |
| FBgn0036667 | 45.238   | 75.799   | 14.677  | 0.194 | -2.369 | 0.001 | 0.010 |
| FBgn0031560 | 211.532  | 354.135  | 68.929  | 0.195 | -2.361 | 0.008 | 0.050 |

|             |          |          |         |       |        |       |       |
|-------------|----------|----------|---------|-------|--------|-------|-------|
| FBgn0063494 | 695.847  | 1164.815 | 226.880 | 0.195 | -2.360 | 0.000 | 0.000 |
| FBgn0034965 | 14.409   | 24.120   | 4.699   | 0.195 | -2.360 | 0.004 | 0.031 |
| FBgn0037934 | 150.454  | 251.781  | 49.126  | 0.195 | -2.358 | 0.000 | 0.000 |
| FBgn0002901 | 30.519   | 51.060   | 9.978   | 0.195 | -2.355 | 0.000 | 0.000 |
| FBgn0058042 | 377.187  | 630.182  | 124.192 | 0.197 | -2.343 | 0.000 | 0.000 |
| FBgn0033697 | 48.058   | 80.277   | 15.838  | 0.197 | -2.342 | 0.000 | 0.006 |
| FBgn0005666 | 2732.777 | 4564.408 | 901.147 | 0.197 | -2.341 | 0.000 | 0.000 |
| FBgn0036029 | 14.278   | 23.820   | 4.736   | 0.199 | -2.330 | 0.005 | 0.035 |
| FBgn0033962 | 188.980  | 314.435  | 63.526  | 0.202 | -2.307 | 0.000 | 0.005 |
| FBgn0040571 | 216.763  | 360.591  | 72.936  | 0.202 | -2.306 | 0.000 | 0.000 |
| FBgn0037635 | 259.665  | 431.653  | 87.676  | 0.203 | -2.300 | 0.000 | 0.000 |
| FBgn0033615 | 45.208   | 75.122   | 15.295  | 0.204 | -2.296 | 0.003 | 0.024 |
| FBgn0053995 | 114.271  | 189.826  | 38.716  | 0.204 | -2.294 | 0.000 | 0.000 |
| FBgn0054008 | 24.310   | 40.383   | 8.237   | 0.204 | -2.294 | 0.005 | 0.034 |
| FBgn0052281 | 143.206  | 237.736  | 48.676  | 0.205 | -2.288 | 0.000 | 0.000 |
| FBgn0035073 | 180.777  | 299.831  | 61.723  | 0.206 | -2.280 | 0.000 | 0.000 |
| FBgn0259711 | 58.378   | 96.725   | 20.031  | 0.207 | -2.272 | 0.000 | 0.000 |
| FBgn0035791 | 371.902  | 616.159  | 127.645 | 0.207 | -2.271 | 0.000 | 0.000 |
| FBgn0000239 | 1579.373 | 2616.627 | 542.119 | 0.207 | -2.271 | 0.000 | 0.000 |
| FBgn0262115 | 328.279  | 543.844  | 112.713 | 0.207 | -2.271 | 0.000 | 0.000 |
| FBgn0032381 | 40.686   | 67.368   | 14.004  | 0.208 | -2.266 | 0.005 | 0.037 |
| FBgn0025874 | 194.381  | 321.833  | 66.928  | 0.208 | -2.266 | 0.000 | 0.000 |
| FBgn0263745 | 37.252   | 61.642   | 12.862  | 0.209 | -2.261 | 0.000 | 0.000 |
| FBgn0261882 | 37.494   | 62.034   | 12.955  | 0.209 | -2.260 | 0.002 | 0.022 |
| FBgn0263831 | 16.805   | 27.788   | 5.823   | 0.210 | -2.255 | 0.002 | 0.017 |
| FBgn0027093 | 188.229  | 311.025  | 65.434  | 0.210 | -2.249 | 0.000 | 0.000 |
| FBgn0031936 | 226.384  | 373.917  | 78.851  | 0.211 | -2.246 | 0.000 | 0.000 |
| FBgn0083973 | 25.239   | 41.660   | 8.818   | 0.212 | -2.240 | 0.000 | 0.004 |
| FBgn0263385 | 20.078   | 33.136   | 7.021   | 0.212 | -2.239 | 0.004 | 0.033 |
| FBgn0260874 | 16.757   | 27.618   | 5.897   | 0.214 | -2.228 | 0.001 | 0.009 |
| FBgn0033453 | 323.153  | 532.321  | 113.985 | 0.214 | -2.223 | 0.000 | 0.000 |
| FBgn0015035 | 135.995  | 223.932  | 48.058  | 0.215 | -2.220 | 0.000 | 0.000 |
| FBgn0029508 | 124.423  | 204.851  | 43.995  | 0.215 | -2.219 | 0.000 | 0.000 |
| FBgn0034951 | 857.730  | 1411.692 | 303.768 | 0.215 | -2.216 | 0.000 | 0.000 |

|             |          |          |         |       |        |       |       |
|-------------|----------|----------|---------|-------|--------|-------|-------|
| FBgn0039116 | 110.756  | 182.252  | 39.259  | 0.215 | -2.215 | 0.000 | 0.000 |
| FBgn0041147 | 51.358   | 84.500   | 18.215  | 0.216 | -2.214 | 0.000 | 0.000 |
| FBgn0042177 | 246.465  | 405.482  | 87.447  | 0.216 | -2.213 | 0.000 | 0.000 |
| FBgn0052442 | 90.563   | 148.962  | 32.164  | 0.216 | -2.211 | 0.000 | 0.000 |
| FBgn0040514 | 21.536   | 35.416   | 7.657   | 0.216 | -2.210 | 0.001 | 0.012 |
| FBgn0031676 | 62.929   | 103.468  | 22.390  | 0.216 | -2.208 | 0.000 | 0.000 |
| FBgn0040805 | 153.820  | 252.900  | 54.739  | 0.216 | -2.208 | 0.000 | 0.000 |
| FBgn0035855 | 27.777   | 45.630   | 9.923   | 0.217 | -2.201 | 0.001 | 0.013 |
| FBgn0264427 | 16.389   | 26.900   | 5.878   | 0.219 | -2.194 | 0.003 | 0.027 |
| FBgn0262003 | 123.549  | 202.726  | 44.372  | 0.219 | -2.192 | 0.000 | 0.000 |
| FBgn0039024 | 1041.359 | 1708.640 | 374.078 | 0.219 | -2.191 | 0.000 | 0.000 |
| FBgn0036116 | 1526.851 | 2504.765 | 548.937 | 0.219 | -2.190 | 0.002 | 0.015 |
| FBgn0261020 | 247.808  | 406.106  | 89.509  | 0.220 | -2.182 | 0.000 | 0.000 |
| FBgn0032196 | 123.500  | 202.313  | 44.687  | 0.221 | -2.179 | 0.000 | 0.000 |
| FBgn0027507 | 209.266  | 342.656  | 75.875  | 0.221 | -2.175 | 0.000 | 0.000 |
| FBgn0042213 | 125.907  | 206.151  | 45.662  | 0.221 | -2.175 | 0.000 | 0.000 |
| FBgn0037014 | 14.448   | 23.654   | 5.242   | 0.222 | -2.174 | 0.005 | 0.035 |
| FBgn0013771 | 438.264  | 717.051  | 159.476 | 0.222 | -2.169 | 0.000 | 0.000 |
| FBgn0051156 | 161.048  | 263.479  | 58.617  | 0.222 | -2.168 | 0.000 | 0.000 |
| FBgn0033467 | 72.008   | 117.785  | 26.230  | 0.223 | -2.167 | 0.007 | 0.047 |
| FBgn0041164 | 90.017   | 147.159  | 32.874  | 0.223 | -2.162 | 0.000 | 0.000 |
| FBgn0023541 | 70.962   | 115.959  | 25.965  | 0.224 | -2.159 | 0.000 | 0.000 |
| FBgn0263076 | 33.590   | 54.861   | 12.319  | 0.225 | -2.155 | 0.000 | 0.001 |
| FBgn0015025 | 87.989   | 143.702  | 32.275  | 0.225 | -2.155 | 0.000 | 0.000 |
| FBgn0003141 | 893.723  | 1459.159 | 328.286 | 0.225 | -2.152 | 0.000 | 0.001 |
| FBgn0028523 | 253.425  | 413.747  | 93.103  | 0.225 | -2.152 | 0.000 | 0.000 |
| FBgn0259482 | 94.289   | 153.630  | 34.949  | 0.227 | -2.136 | 0.000 | 0.000 |
| FBgn0038665 | 1346.249 | 2191.119 | 501.379 | 0.229 | -2.128 | 0.000 | 0.000 |
| FBgn0032484 | 191.871  | 312.170  | 71.572  | 0.229 | -2.125 | 0.000 | 0.000 |
| FBgn0032218 | 231.279  | 376.278  | 86.279  | 0.229 | -2.125 | 0.000 | 0.000 |
| FBgn0029664 | 406.796  | 661.793  | 151.799 | 0.229 | -2.124 | 0.000 | 0.000 |
| FBgn0026255 | 86.856   | 141.215  | 32.498  | 0.230 | -2.119 | 0.000 | 0.000 |
| FBgn0025456 | 338.412  | 550.193  | 126.632 | 0.230 | -2.119 | 0.000 | 0.005 |
| FBgn0039911 | 1260.116 | 2048.388 | 471.844 | 0.230 | -2.118 | 0.000 | 0.000 |

|             |          |           |          |       |        |       |       |
|-------------|----------|-----------|----------|-------|--------|-------|-------|
| FBgn0035907 | 65.548   | 106.551   | 24.545   | 0.230 | -2.118 | 0.000 | 0.001 |
| FBgn0031548 | 55.091   | 89.552    | 20.630   | 0.230 | -2.118 | 0.000 | 0.000 |
| FBgn0038194 | 3778.657 | 6141.047  | 1416.267 | 0.231 | -2.116 | 0.000 | 0.000 |
| FBgn0026432 | 236.585  | 384.470   | 88.700   | 0.231 | -2.116 | 0.000 | 0.000 |
| FBgn0022213 | 161.321  | 261.851   | 60.791   | 0.232 | -2.107 | 0.000 | 0.000 |
| FBgn0010198 | 6480.050 | 10512.334 | 2447.766 | 0.233 | -2.103 | 0.000 | 0.000 |
| FBgn0036889 | 204.996  | 332.486   | 77.505   | 0.233 | -2.101 | 0.000 | 0.000 |
| FBgn0038292 | 281.796  | 456.979   | 106.613  | 0.233 | -2.100 | 0.000 | 0.000 |
| FBgn0250907 | 26.263   | 42.585    | 9.941    | 0.233 | -2.099 | 0.000 | 0.003 |
| FBgn0051812 | 40.204   | 65.187    | 15.221   | 0.233 | -2.099 | 0.000 | 0.001 |
| FBgn0263408 | 21.743   | 35.249    | 8.237    | 0.234 | -2.097 | 0.001 | 0.006 |
| FBgn0031874 | 29.340   | 47.559    | 11.121   | 0.234 | -2.096 | 0.001 | 0.008 |
| FBgn0262481 | 72.005   | 116.718   | 27.292   | 0.234 | -2.096 | 0.000 | 0.000 |
| FBgn0038429 | 157.188  | 254.506   | 59.870   | 0.235 | -2.088 | 0.000 | 0.000 |
| FBgn0026309 | 93.817   | 151.783   | 35.851   | 0.236 | -2.082 | 0.000 | 0.000 |
| FBgn0031662 | 322.900  | 522.385   | 123.415  | 0.236 | -2.082 | 0.000 | 0.000 |
| FBgn0036723 | 51.771   | 83.734    | 19.809   | 0.237 | -2.080 | 0.001 | 0.013 |
| FBgn0032473 | 21.614   | 34.953    | 8.274    | 0.237 | -2.079 | 0.002 | 0.018 |
| FBgn0037960 | 114.873  | 185.770   | 43.977   | 0.237 | -2.079 | 0.000 | 0.000 |
| FBgn0037371 | 177.534  | 286.564   | 68.503   | 0.239 | -2.065 | 0.000 | 0.000 |
| FBgn0034176 | 241.450  | 389.594   | 93.307   | 0.239 | -2.062 | 0.000 | 0.000 |
| FBgn0034054 | 95.972   | 154.747   | 37.197   | 0.240 | -2.057 | 0.000 | 0.000 |
| FBgn0262035 | 327.145  | 527.355   | 126.935  | 0.241 | -2.055 | 0.000 | 0.001 |
| FBgn0037076 | 123.751  | 199.445   | 48.058   | 0.241 | -2.053 | 0.000 | 0.000 |
| FBgn0031701 | 1922.165 | 3096.734  | 747.596  | 0.241 | -2.050 | 0.000 | 0.003 |
| FBgn0039735 | 457.910  | 737.623   | 178.198  | 0.242 | -2.049 | 0.000 | 0.000 |
| FBgn0024733 | 2676.817 | 4311.820  | 1041.813 | 0.242 | -2.049 | 0.000 | 0.000 |
| FBgn0039485 | 57.429   | 92.506    | 22.353   | 0.242 | -2.049 | 0.000 | 0.000 |
| FBgn0026634 | 213.846  | 344.321   | 83.372   | 0.242 | -2.046 | 0.000 | 0.000 |
| FBgn0085271 | 367.746  | 590.317   | 145.175  | 0.246 | -2.024 | 0.000 | 0.002 |
| FBgn0038037 | 1637.821 | 2627.091  | 648.552  | 0.247 | -2.018 | 0.000 | 0.000 |
| FBgn0032018 | 651.649  | 1044.977  | 258.321  | 0.247 | -2.016 | 0.000 | 0.000 |
| FBgn0039821 | 99.081   | 158.867   | 39.296   | 0.247 | -2.015 | 0.000 | 0.000 |
| FBgn0036036 | 25.247   | 40.479    | 10.015   | 0.247 | -2.015 | 0.000 | 0.005 |

|             |          |          |         |       |        |       |       |
|-------------|----------|----------|---------|-------|--------|-------|-------|
| FBgn0032002 | 76.722   | 122.947  | 30.497  | 0.248 | -2.011 | 0.000 | 0.000 |
| FBgn0039703 | 1068.155 | 1711.521 | 424.790 | 0.248 | -2.010 | 0.000 | 0.001 |
| FBgn0039415 | 16.372   | 26.230   | 6.514   | 0.248 | -2.010 | 0.004 | 0.029 |
| FBgn0037228 | 314.849  | 504.116  | 125.582 | 0.249 | -2.005 | 0.000 | 0.000 |
| FBgn0031894 | 54.317   | 86.898   | 21.735  | 0.250 | -1.999 | 0.000 | 0.000 |
| FBgn0039132 | 410.892  | 657.289  | 164.495 | 0.250 | -1.998 | 0.000 | 0.000 |
| FBgn0034475 | 172.689  | 276.164  | 69.213  | 0.251 | -1.996 | 0.000 | 0.000 |
| FBgn0036911 | 419.782  | 671.234  | 168.330 | 0.251 | -1.996 | 0.000 | 0.000 |
| FBgn0263606 | 34.829   | 55.616   | 14.041  | 0.252 | -1.986 | 0.000 | 0.004 |
| FBgn0031564 | 153.677  | 245.384  | 61.970  | 0.253 | -1.985 | 0.000 | 0.000 |
| FBgn0046322 | 24.957   | 39.843   | 10.071  | 0.253 | -1.984 | 0.001 | 0.010 |
| FBgn0039172 | 862.425  | 1376.000 | 348.850 | 0.254 | -1.980 | 0.000 | 0.000 |
| FBgn0036062 | 69.797   | 111.345  | 28.249  | 0.254 | -1.979 | 0.000 | 0.000 |
| FBgn0262286 | 33.421   | 53.306   | 13.535  | 0.254 | -1.978 | 0.007 | 0.048 |
| FBgn0053095 | 190.200  | 303.326  | 77.073  | 0.254 | -1.977 | 0.001 | 0.009 |
| FBgn0011829 | 54.597   | 86.953   | 22.241  | 0.256 | -1.967 | 0.000 | 0.000 |
| FBgn0037646 | 192.363  | 306.015  | 78.710  | 0.257 | -1.959 | 0.000 | 0.000 |
| FBgn0261530 | 268.240  | 426.496  | 109.984 | 0.258 | -1.955 | 0.000 | 0.000 |
| FBgn0030813 | 45.543   | 72.401   | 18.685  | 0.258 | -1.954 | 0.000 | 0.001 |
| FBgn0036550 | 167.624  | 266.387  | 68.861  | 0.259 | -1.952 | 0.000 | 0.000 |
| FBgn0026431 | 22.859   | 36.301   | 9.416   | 0.259 | -1.947 | 0.002 | 0.016 |
| FBgn0050428 | 223.664  | 354.663  | 92.664  | 0.261 | -1.936 | 0.000 | 0.000 |
| FBgn0030562 | 340.551  | 539.948  | 141.155 | 0.261 | -1.936 | 0.006 | 0.044 |
| FBgn0036331 | 66.525   | 105.473  | 27.576  | 0.261 | -1.935 | 0.001 | 0.013 |
| FBgn0032217 | 115.105  | 182.455  | 47.755  | 0.262 | -1.934 | 0.000 | 0.001 |
| FBgn0051278 | 107.491  | 170.313  | 44.668  | 0.262 | -1.931 | 0.000 | 0.000 |
| FBgn0033215 | 22.547   | 35.716   | 9.379   | 0.263 | -1.929 | 0.003 | 0.024 |
| FBgn0024698 | 94.366   | 149.473  | 39.259  | 0.263 | -1.929 | 0.000 | 0.000 |
| FBgn0051368 | 256.115  | 405.537  | 106.694 | 0.263 | -1.926 | 0.000 | 0.000 |
| FBgn0039908 | 2182.294 | 3455.172 | 909.417 | 0.263 | -1.926 | 0.000 | 0.000 |
| FBgn0036210 | 130.793  | 207.032  | 54.554  | 0.264 | -1.924 | 0.000 | 0.000 |
| FBgn0032603 | 224.054  | 354.592  | 93.517  | 0.264 | -1.923 | 0.000 | 0.000 |
| FBgn0036745 | 722.385  | 1142.533 | 302.237 | 0.265 | -1.918 | 0.000 | 0.000 |
| FBgn0039065 | 78.686   | 124.441  | 32.930  | 0.265 | -1.918 | 0.000 | 0.000 |

|             |          |          |          |       |        |       |       |
|-------------|----------|----------|----------|-------|--------|-------|-------|
| FBgn0039924 | 372.881  | 589.672  | 156.091  | 0.265 | -1.918 | 0.000 | 0.000 |
| FBgn0001612 | 203.567  | 321.824  | 85.310   | 0.265 | -1.915 | 0.000 | 0.000 |
| FBgn0261387 | 237.844  | 375.663  | 100.025  | 0.266 | -1.909 | 0.000 | 0.000 |
| FBgn0032836 | 2998.832 | 4735.627 | 1262.038 | 0.266 | -1.908 | 0.000 | 0.000 |
| FBgn0032224 | 74.307   | 117.333  | 31.281   | 0.267 | -1.907 | 0.000 | 0.000 |
| FBgn0041181 | 930.299  | 1468.563 | 392.034  | 0.267 | -1.905 | 0.000 | 0.000 |
| FBgn0036587 | 138.403  | 218.419  | 58.388   | 0.267 | -1.903 | 0.000 | 0.000 |
| FBgn0051778 | 359.330  | 567.010  | 151.651  | 0.267 | -1.903 | 0.000 | 0.000 |
| FBgn0039145 | 233.597  | 368.423  | 98.771   | 0.268 | -1.899 | 0.000 | 0.000 |
| FBgn0037687 | 151.205  | 238.457  | 63.952   | 0.268 | -1.899 | 0.000 | 0.000 |
| FBgn0028647 | 313.191  | 493.804  | 132.578  | 0.268 | -1.897 | 0.000 | 0.000 |
| FBgn0031213 | 382.434  | 602.936  | 161.932  | 0.269 | -1.897 | 0.000 | 0.000 |
| FBgn0046999 | 151.495  | 238.810  | 64.181   | 0.269 | -1.896 | 0.000 | 0.000 |
| FBgn0052218 | 147.850  | 232.908  | 62.791   | 0.270 | -1.891 | 0.001 | 0.013 |
| FBgn0039958 | 264.072  | 415.986  | 112.158  | 0.270 | -1.891 | 0.000 | 0.000 |
| FBgn0036300 | 292.495  | 460.476  | 124.514  | 0.270 | -1.887 | 0.000 | 0.000 |
| FBgn0038472 | 192.513  | 303.062  | 81.964   | 0.270 | -1.887 | 0.000 | 0.000 |
| FBgn0031694 | 36.005   | 56.678   | 15.332   | 0.271 | -1.886 | 0.001 | 0.007 |
| FBgn0065032 | 42.638   | 67.116   | 18.160   | 0.271 | -1.886 | 0.000 | 0.002 |
| FBgn0005390 | 19.217   | 30.234   | 8.200    | 0.271 | -1.882 | 0.005 | 0.037 |
| FBgn0023096 | 53.537   | 84.214   | 22.859   | 0.271 | -1.881 | 0.000 | 0.003 |
| FBgn0010389 | 384.599  | 604.962  | 164.236  | 0.271 | -1.881 | 0.000 | 0.000 |
| FBgn0003041 | 189.591  | 298.176  | 81.007   | 0.272 | -1.880 | 0.000 | 0.000 |
| FBgn0002899 | 32.764   | 51.523   | 14.004   | 0.272 | -1.879 | 0.001 | 0.011 |
| FBgn0039298 | 314.808  | 494.939  | 134.677  | 0.272 | -1.878 | 0.000 | 0.000 |
| FBgn0037376 | 166.630  | 261.965  | 71.294   | 0.272 | -1.878 | 0.002 | 0.018 |
| FBgn0035443 | 80.706   | 126.833  | 34.579   | 0.273 | -1.875 | 0.000 | 0.000 |
| FBgn0037305 | 370.448  | 582.167  | 158.729  | 0.273 | -1.875 | 0.000 | 0.000 |
| FBgn0035805 | 213.717  | 335.603  | 91.831   | 0.274 | -1.870 | 0.000 | 0.000 |
| FBgn0038627 | 130.840  | 205.440  | 56.240   | 0.274 | -1.869 | 0.000 | 0.000 |
| FBgn0063498 | 166.316  | 261.141  | 71.491   | 0.274 | -1.869 | 0.000 | 0.000 |
| FBgn0033021 | 621.447  | 975.625  | 267.268  | 0.274 | -1.868 | 0.000 | 0.000 |
| FBgn0032974 | 762.894  | 1197.311 | 328.478  | 0.274 | -1.866 | 0.000 | 0.000 |
| FBgn0002466 | 23.130   | 36.301   | 9.960    | 0.274 | -1.866 | 0.004 | 0.029 |



|             |          |          |          |       |        |       |       |
|-------------|----------|----------|----------|-------|--------|-------|-------|
| FBgn0260744 | 1661.445 | 2606.681 | 716.210  | 0.275 | -1.864 | 0.000 | 0.000 |
| FBgn0036433 | 656.456  | 1029.838 | 283.075  | 0.275 | -1.863 | 0.000 | 0.000 |
| FBgn0035703 | 107.256  | 168.251  | 46.261   | 0.275 | -1.863 | 0.000 | 0.000 |
| FBgn0263110 | 2521.819 | 3954.153 | 1089.484 | 0.276 | -1.860 | 0.000 | 0.000 |
| FBgn0030163 | 297.915  | 466.988  | 128.843  | 0.276 | -1.858 | 0.000 | 0.000 |
| FBgn0037583 | 53.208   | 83.390   | 23.026   | 0.276 | -1.857 | 0.000 | 0.001 |
| FBgn0085216 | 70.137   | 109.889  | 30.386   | 0.277 | -1.855 | 0.002 | 0.020 |
| FBgn0035721 | 124.874  | 195.589  | 54.159   | 0.277 | -1.853 | 0.000 | 0.000 |
| FBgn0032896 | 446.754  | 699.695  | 193.814  | 0.277 | -1.852 | 0.000 | 0.000 |
| FBgn0031232 | 89.511   | 140.177  | 38.845   | 0.277 | -1.851 | 0.001 | 0.009 |
| FBgn0033633 | 33.687   | 52.752   | 14.622   | 0.277 | -1.851 | 0.001 | 0.009 |
| FBgn0260962 | 479.045  | 750.137  | 207.953  | 0.277 | -1.851 | 0.000 | 0.000 |
| FBgn0015562 | 175.179  | 274.180  | 76.178   | 0.278 | -1.848 | 0.000 | 0.000 |
| FBgn0038034 | 112.978  | 176.773  | 49.182   | 0.278 | -1.846 | 0.000 | 0.000 |
| FBgn0083983 | 167.104  | 261.364  | 72.843   | 0.279 | -1.843 | 0.003 | 0.027 |
| FBgn0031549 | 47.261   | 73.911   | 20.611   | 0.279 | -1.842 | 0.000 | 0.003 |
| FBgn0053145 | 314.548  | 491.480  | 137.616  | 0.280 | -1.836 | 0.000 | 0.000 |
| FBgn0035960 | 51.381   | 80.281   | 22.482   | 0.280 | -1.836 | 0.000 | 0.001 |
| FBgn0034007 | 48.319   | 75.483   | 21.155   | 0.280 | -1.835 | 0.004 | 0.030 |
| FBgn0013563 | 199.868  | 312.216  | 87.521   | 0.280 | -1.835 | 0.000 | 0.000 |
| FBgn0052026 | 24.140   | 37.703   | 10.577   | 0.281 | -1.834 | 0.001 | 0.014 |
| FBgn0015925 | 89.971   | 140.480  | 39.463   | 0.281 | -1.832 | 0.000 | 0.000 |
| FBgn0030757 | 271.974  | 423.966  | 119.981  | 0.283 | -1.821 | 0.000 | 0.000 |
| FBgn0261403 | 488.670  | 761.008  | 216.332  | 0.284 | -1.815 | 0.000 | 0.000 |
| FBgn0003943 | 1292.706 | 2012.296 | 573.117  | 0.285 | -1.812 | 0.000 | 0.001 |
| FBgn0053178 | 2108.692 | 3276.947 | 940.436  | 0.287 | -1.801 | 0.006 | 0.042 |
| FBgn0032247 | 72.204   | 112.188  | 32.220   | 0.287 | -1.800 | 0.000 | 0.000 |
| FBgn0032189 | 106.318  | 165.158  | 47.478   | 0.287 | -1.799 | 0.000 | 0.000 |
| FBgn0260749 | 447.418  | 694.890  | 199.945  | 0.288 | -1.797 | 0.000 | 0.000 |
| FBgn0010173 | 528.090  | 820.033  | 236.147  | 0.288 | -1.796 | 0.000 | 0.000 |
| FBgn0031695 | 47.351   | 73.493   | 21.210   | 0.289 | -1.793 | 0.000 | 0.003 |
| FBgn0036988 | 104.868  | 162.745  | 46.990   | 0.289 | -1.792 | 0.000 | 0.000 |
| FBgn0032908 | 28.947   | 44.902   | 12.992   | 0.289 | -1.789 | 0.005 | 0.036 |
| FBgn0039609 | 770.819  | 1194.790 | 346.848  | 0.290 | -1.784 | 0.001 | 0.008 |

|             |          |          |         |       |        |       |       |
|-------------|----------|----------|---------|-------|--------|-------|-------|
| FBgn0037017 | 50.546   | 78.345   | 22.748  | 0.290 | -1.784 | 0.000 | 0.002 |
| FBgn0004107 | 165.638  | 256.685  | 74.591  | 0.291 | -1.783 | 0.003 | 0.022 |
| FBgn0037513 | 1004.782 | 1556.886 | 452.677 | 0.291 | -1.782 | 0.000 | 0.000 |
| FBgn0051133 | 54.509   | 84.455   | 24.563  | 0.291 | -1.782 | 0.000 | 0.001 |
| FBgn0051514 | 24.712   | 38.284   | 11.139  | 0.291 | -1.781 | 0.004 | 0.031 |
| FBgn0032973 | 27.169   | 42.074   | 12.263  | 0.291 | -1.779 | 0.001 | 0.013 |
| FBgn0003353 | 523.473  | 810.578  | 236.369 | 0.292 | -1.778 | 0.000 | 0.000 |
| FBgn0051300 | 45.798   | 70.910   | 20.685  | 0.292 | -1.777 | 0.000 | 0.002 |
| FBgn0261843 | 22.251   | 34.450   | 10.052  | 0.292 | -1.777 | 0.005 | 0.035 |
| FBgn0026190 | 27.354   | 42.333   | 12.374  | 0.292 | -1.774 | 0.002 | 0.016 |
| FBgn0033113 | 42.604   | 65.905   | 19.302  | 0.293 | -1.772 | 0.000 | 0.003 |
| FBgn0033683 | 302.681  | 468.201  | 137.160 | 0.293 | -1.771 | 0.001 | 0.007 |
| FBgn0031678 | 24.617   | 38.077   | 11.158  | 0.293 | -1.771 | 0.003 | 0.025 |
| FBgn0262518 | 1262.968 | 1952.945 | 572.992 | 0.293 | -1.769 | 0.000 | 0.004 |
| FBgn0032387 | 34.926   | 53.977   | 15.875  | 0.294 | -1.766 | 0.001 | 0.013 |
| FBgn0033348 | 28.466   | 43.977   | 12.955  | 0.295 | -1.763 | 0.002 | 0.015 |
| FBgn0033742 | 51.420   | 79.437   | 23.402  | 0.295 | -1.763 | 0.000 | 0.004 |
| FBgn0037490 | 76.259   | 117.792  | 34.727  | 0.295 | -1.762 | 0.000 | 0.001 |
| FBgn0052038 | 135.853  | 209.798  | 61.908  | 0.295 | -1.761 | 0.000 | 0.000 |
| FBgn0038972 | 294.571  | 454.786  | 134.356 | 0.295 | -1.759 | 0.000 | 0.000 |
| FBgn0053180 | 762.835  | 1177.266 | 348.404 | 0.296 | -1.757 | 0.000 | 0.000 |
| FBgn0032266 | 138.783  | 214.176  | 63.390  | 0.296 | -1.756 | 0.000 | 0.000 |
| FBgn0036714 | 274.823  | 423.785  | 125.860 | 0.297 | -1.752 | 0.000 | 0.000 |
| FBgn0036887 | 938.584  | 1447.146 | 430.023 | 0.297 | -1.751 | 0.004 | 0.029 |
| FBgn0025806 | 255.738  | 394.149  | 117.326 | 0.298 | -1.748 | 0.000 | 0.000 |
| FBgn0037384 | 77.952   | 120.127  | 35.777  | 0.298 | -1.747 | 0.000 | 0.000 |
| FBgn0032079 | 90.577   | 139.517  | 41.636  | 0.298 | -1.745 | 0.006 | 0.042 |
| FBgn0033557 | 116.257  | 178.918  | 53.597  | 0.300 | -1.739 | 0.000 | 0.000 |
| FBgn0032876 | 952.045  | 1465.115 | 438.974 | 0.300 | -1.739 | 0.000 | 0.000 |
| FBgn0036818 | 65.854   | 101.284  | 30.423  | 0.300 | -1.735 | 0.000 | 0.001 |
| FBgn0030588 | 118.357  | 181.939  | 54.776  | 0.301 | -1.732 | 0.000 | 0.000 |
| FBgn0036105 | 45.001   | 69.032   | 20.970  | 0.304 | -1.719 | 0.001 | 0.012 |
| FBgn0058378 | 38.049   | 58.352   | 17.746  | 0.304 | -1.717 | 0.001 | 0.010 |
| FBgn0039914 | 366.875  | 562.506  | 171.244 | 0.304 | -1.716 | 0.002 | 0.019 |

|             |          |           |          |       |        |       |       |
|-------------|----------|-----------|----------|-------|--------|-------|-------|
| FBgn0037338 | 66.416   | 101.791   | 31.041   | 0.305 | -1.713 | 0.000 | 0.001 |
| FBgn0036876 | 965.226  | 1478.762  | 451.689  | 0.305 | -1.711 | 0.000 | 0.000 |
| FBgn0031834 | 136.770  | 209.496   | 64.044   | 0.306 | -1.710 | 0.000 | 0.001 |
| FBgn0037647 | 189.868  | 290.789   | 88.947   | 0.306 | -1.709 | 0.000 | 0.000 |
| FBgn0037556 | 1336.167 | 2045.777  | 626.558  | 0.306 | -1.707 | 0.000 | 0.000 |
| FBgn0011802 | 68.135   | 104.298   | 31.973   | 0.307 | -1.706 | 0.005 | 0.038 |
| FBgn0038110 | 417.129  | 638.456   | 195.801  | 0.307 | -1.705 | 0.000 | 0.000 |
| FBgn0051108 | 218.551  | 334.287   | 102.816  | 0.308 | -1.701 | 0.000 | 0.000 |
| FBgn0032955 | 1233.548 | 1886.446  | 580.650  | 0.308 | -1.700 | 0.000 | 0.000 |
| FBgn0034972 | 157.582  | 240.975   | 74.189   | 0.308 | -1.700 | 0.000 | 0.000 |
| FBgn0052195 | 85.859   | 131.279   | 40.438   | 0.308 | -1.699 | 0.002 | 0.016 |
| FBgn0036985 | 200.163  | 305.958   | 94.368   | 0.308 | -1.697 | 0.000 | 0.000 |
| FBgn0050423 | 802.827  | 1226.821  | 378.834  | 0.309 | -1.695 | 0.000 | 0.001 |
| FBgn0261574 | 912.259  | 1393.286  | 431.231  | 0.310 | -1.692 | 0.000 | 0.000 |
| FBgn0039313 | 54.355   | 82.986    | 25.724   | 0.310 | -1.690 | 0.000 | 0.001 |
| FBgn0063492 | 57.861   | 88.331    | 27.391   | 0.310 | -1.689 | 0.005 | 0.036 |
| FBgn0039084 | 278.589  | 425.262   | 131.917  | 0.310 | -1.689 | 0.000 | 0.000 |
| FBgn0004435 | 9829.027 | 15003.729 | 4654.326 | 0.310 | -1.689 | 0.000 | 0.000 |
| FBgn0030614 | 73.653   | 112.295   | 35.011   | 0.312 | -1.681 | 0.002 | 0.020 |
| FBgn0051974 | 418.954  | 638.655   | 199.253  | 0.312 | -1.680 | 0.000 | 0.000 |
| FBgn0051860 | 75.261   | 114.690   | 35.832   | 0.312 | -1.678 | 0.000 | 0.003 |
| FBgn0039006 | 121.584  | 185.243   | 57.925   | 0.313 | -1.677 | 0.000 | 0.001 |
| FBgn0035892 | 216.629  | 330.048   | 103.211  | 0.313 | -1.677 | 0.000 | 0.000 |
| FBgn0038303 | 570.649  | 869.245   | 272.053  | 0.313 | -1.676 | 0.000 | 0.000 |
| FBgn0034032 | 238.438  | 363.181   | 113.696  | 0.313 | -1.676 | 0.000 | 0.000 |
| FBgn0032246 | 607.904  | 925.118   | 290.689  | 0.314 | -1.670 | 0.000 | 0.000 |
| FBgn0260474 | 377.696  | 574.329   | 181.063  | 0.315 | -1.665 | 0.000 | 0.004 |
| FBgn0033821 | 664.565  | 1010.513  | 318.617  | 0.315 | -1.665 | 0.000 | 0.000 |
| FBgn0031999 | 321.378  | 488.455   | 154.301  | 0.316 | -1.662 | 0.000 | 0.000 |
| FBgn0030723 | 348.243  | 529.267   | 167.218  | 0.316 | -1.662 | 0.000 | 0.000 |
| FBgn0035838 | 24.319   | 36.937    | 11.701   | 0.317 | -1.658 | 0.004 | 0.033 |
| FBgn0036509 | 803.195  | 1219.740  | 386.651  | 0.317 | -1.657 | 0.000 | 0.000 |
| FBgn0031655 | 116.478  | 176.865   | 56.092   | 0.317 | -1.657 | 0.005 | 0.038 |
| FBgn0045073 | 499.044  | 757.606   | 240.482  | 0.317 | -1.656 | 0.000 | 0.000 |

|             |           |           |           |       |        |       |       |
|-------------|-----------|-----------|-----------|-------|--------|-------|-------|
| FBgn0039732 | 159.252   | 241.672   | 76.832    | 0.318 | -1.653 | 0.000 | 0.000 |
| FBgn0027082 | 112.109   | 170.077   | 54.140    | 0.318 | -1.651 | 0.000 | 0.000 |
| FBgn0033762 | 724.990   | 1099.847  | 350.132   | 0.318 | -1.651 | 0.000 | 0.000 |
| FBgn0037288 | 1371.525  | 2080.442  | 662.608   | 0.318 | -1.651 | 0.000 | 0.001 |
| FBgn0036536 | 36.170    | 54.817    | 17.524    | 0.320 | -1.645 | 0.002 | 0.015 |
| FBgn0031925 | 36.287    | 54.976    | 17.598    | 0.320 | -1.643 | 0.003 | 0.023 |
| FBgn0041087 | 352.647   | 534.001   | 171.293   | 0.321 | -1.640 | 0.000 | 0.000 |
| FBgn0032880 | 1110.227  | 1681.021  | 539.432   | 0.321 | -1.640 | 0.000 | 0.000 |
| FBgn0034271 | 363.961   | 550.874   | 177.049   | 0.321 | -1.638 | 0.000 | 0.000 |
| FBgn0032250 | 133.367   | 201.843   | 64.891    | 0.321 | -1.637 | 0.000 | 0.000 |
| FBgn0051251 | 60.404    | 91.417    | 29.392    | 0.322 | -1.637 | 0.005 | 0.036 |
| FBgn0003891 | 5443.811  | 8236.516  | 2651.106  | 0.322 | -1.635 | 0.000 | 0.000 |
| FBgn0033982 | 99.456    | 150.446   | 48.465    | 0.322 | -1.634 | 0.000 | 0.000 |
| FBgn0030693 | 394.312   | 596.454   | 192.170   | 0.322 | -1.634 | 0.000 | 0.000 |
| FBgn0039244 | 112.868   | 170.639   | 55.097    | 0.323 | -1.631 | 0.000 | 0.000 |
| FBgn0051643 | 86.174    | 130.205   | 42.143    | 0.324 | -1.627 | 0.000 | 0.001 |
| FBgn0264501 | 36.256    | 54.766    | 17.746    | 0.324 | -1.626 | 0.003 | 0.024 |
| FBgn0261049 | 354.584   | 535.498   | 173.671   | 0.324 | -1.625 | 0.000 | 0.000 |
| FBgn0037778 | 159.885   | 241.455   | 78.315    | 0.324 | -1.624 | 0.000 | 0.004 |
| FBgn0051460 | 91.952    | 138.840   | 45.063    | 0.325 | -1.623 | 0.000 | 0.001 |
| FBgn0037742 | 22.743    | 34.327    | 11.158    | 0.325 | -1.621 | 0.004 | 0.028 |
| FBgn0004419 | 384.172   | 579.353   | 188.991   | 0.326 | -1.616 | 0.000 | 0.000 |
| FBgn0032987 | 20335.255 | 30641.315 | 10029.195 | 0.327 | -1.611 | 0.000 | 0.002 |
| FBgn0027341 | 1996.584  | 3007.113  | 986.055   | 0.328 | -1.609 | 0.001 | 0.008 |
| FBgn0037022 | 246.440   | 371.139   | 121.741   | 0.328 | -1.608 | 0.000 | 0.000 |
| FBgn0036839 | 81.896    | 123.243   | 40.550    | 0.329 | -1.604 | 0.000 | 0.003 |
| FBgn0037369 | 148.644   | 223.680   | 73.609    | 0.329 | -1.603 | 0.000 | 0.000 |
| FBgn0035968 | 308.266   | 463.855   | 152.677   | 0.329 | -1.603 | 0.000 | 0.003 |
| FBgn0038435 | 65.852    | 99.015    | 32.689    | 0.330 | -1.599 | 0.001 | 0.014 |
| FBgn0034452 | 63.964    | 96.140    | 31.788    | 0.331 | -1.597 | 0.000 | 0.001 |
| FBgn0033540 | 135.256   | 203.269   | 67.243    | 0.331 | -1.596 | 0.000 | 0.000 |
| FBgn0036117 | 90.864    | 136.553   | 45.174    | 0.331 | -1.596 | 0.000 | 0.006 |
| FBgn0035420 | 542.969   | 815.948   | 269.990   | 0.331 | -1.596 | 0.000 | 0.000 |
| FBgn0011771 | 444.572   | 667.840   | 221.303   | 0.331 | -1.593 | 0.000 | 0.000 |

|             |          |          |          |       |        |       |       |
|-------------|----------|----------|----------|-------|--------|-------|-------|
| FBgn0263738 | 206.997  | 310.930  | 103.063  | 0.331 | -1.593 | 0.002 | 0.016 |
| FBgn0038020 | 310.072  | 465.467  | 154.678  | 0.332 | -1.589 | 0.000 | 0.000 |
| FBgn0038965 | 515.185  | 773.008  | 257.362  | 0.333 | -1.587 | 0.000 | 0.000 |
| FBgn0260720 | 34.091   | 51.146   | 17.036   | 0.333 | -1.586 | 0.003 | 0.022 |
| FBgn0032033 | 161.408  | 242.106  | 80.710   | 0.333 | -1.585 | 0.007 | 0.045 |
| FBgn0263608 | 45.648   | 68.437   | 22.859   | 0.334 | -1.582 | 0.002 | 0.021 |
| FBgn0003969 | 640.623  | 960.037  | 321.210  | 0.335 | -1.580 | 0.000 | 0.001 |
| FBgn0039270 | 242.841  | 363.793  | 121.889  | 0.335 | -1.578 | 0.007 | 0.048 |
| FBgn0036770 | 445.559  | 667.370  | 223.749  | 0.335 | -1.577 | 0.000 | 0.005 |
| FBgn0050062 | 72.281   | 108.225  | 36.338   | 0.336 | -1.574 | 0.002 | 0.021 |
| FBgn0259214 | 2574.321 | 3852.349 | 1296.292 | 0.336 | -1.571 | 0.001 | 0.013 |
| FBgn0002939 | 105.333  | 157.496  | 53.171   | 0.338 | -1.567 | 0.002 | 0.015 |
| FBgn0031253 | 75.970   | 113.584  | 38.357   | 0.338 | -1.566 | 0.000 | 0.002 |
| FBgn0033924 | 1398.399 | 2089.815 | 706.983  | 0.338 | -1.564 | 0.000 | 0.000 |
| FBgn0038814 | 39.785   | 59.447   | 20.123   | 0.339 | -1.563 | 0.002 | 0.020 |
| FBgn0040466 | 249.544  | 372.618  | 126.471  | 0.339 | -1.559 | 0.000 | 0.000 |
| FBgn0028940 | 1694.541 | 2530.128 | 858.955  | 0.339 | -1.559 | 0.000 | 0.000 |
| FBgn0036579 | 623.329  | 930.362  | 316.295  | 0.340 | -1.557 | 0.000 | 0.000 |
| FBgn0261984 | 1347.668 | 2011.088 | 684.248  | 0.340 | -1.555 | 0.000 | 0.000 |
| FBgn0032404 | 1170.736 | 1746.108 | 595.365  | 0.341 | -1.552 | 0.007 | 0.045 |
| FBgn0028645 | 282.499  | 421.282  | 143.717  | 0.341 | -1.552 | 0.000 | 0.003 |
| FBgn0039684 | 103.251  | 153.937  | 52.565   | 0.341 | -1.550 | 0.000 | 0.002 |
| FBgn0032683 | 261.987  | 390.513  | 133.461  | 0.342 | -1.549 | 0.000 | 0.000 |
| FBgn0015572 | 27.645   | 41.156   | 14.134   | 0.343 | -1.542 | 0.005 | 0.036 |
| FBgn0032922 | 130.333  | 193.960  | 66.706   | 0.344 | -1.540 | 0.006 | 0.043 |
| FBgn0026315 | 29.947   | 44.562   | 15.332   | 0.344 | -1.539 | 0.005 | 0.038 |
| FBgn0035710 | 1666.832 | 2480.290 | 853.374  | 0.344 | -1.539 | 0.000 | 0.000 |
| FBgn0024806 | 1136.602 | 1691.007 | 582.198  | 0.344 | -1.538 | 0.000 | 0.000 |
| FBgn0000055 | 74.464   | 110.774  | 38.154   | 0.344 | -1.538 | 0.000 | 0.002 |
| FBgn0000317 | 729.283  | 1084.803 | 373.763  | 0.345 | -1.537 | 0.000 | 0.000 |
| FBgn0033439 | 166.686  | 247.926  | 85.446   | 0.345 | -1.537 | 0.000 | 0.000 |
| FBgn0032704 | 1619.155 | 2407.504 | 830.805  | 0.345 | -1.535 | 0.000 | 0.000 |
| FBgn0032447 | 496.487  | 738.197  | 254.776  | 0.345 | -1.535 | 0.001 | 0.013 |
| FBgn0052113 | 306.524  | 455.671  | 157.376  | 0.345 | -1.534 | 0.000 | 0.004 |

|             |           |           |           |       |        |       |       |
|-------------|-----------|-----------|-----------|-------|--------|-------|-------|
| FBgn0051495 | 74.342    | 110.511   | 38.172    | 0.345 | -1.534 | 0.000 | 0.004 |
| FBgn0034154 | 71.197    | 105.796   | 36.598    | 0.346 | -1.531 | 0.000 | 0.002 |
| FBgn0031170 | 1639.542  | 2436.251  | 842.833   | 0.346 | -1.531 | 0.000 | 0.000 |
| FBgn0039325 | 435.002   | 646.300   | 223.705   | 0.346 | -1.531 | 0.000 | 0.000 |
| FBgn0035695 | 933.930   | 1386.891  | 480.969   | 0.347 | -1.528 | 0.000 | 0.000 |
| FBgn0036959 | 34.051    | 50.560    | 17.543    | 0.347 | -1.527 | 0.002 | 0.017 |
| FBgn0035975 | 923.502   | 1371.133  | 475.870   | 0.347 | -1.527 | 0.000 | 0.000 |
| FBgn0030707 | 150.372   | 223.183   | 77.561    | 0.348 | -1.525 | 0.000 | 0.003 |
| FBgn0032398 | 853.524   | 1266.448  | 440.599   | 0.348 | -1.523 | 0.000 | 0.000 |
| FBgn0032168 | 191.178   | 283.604   | 98.753    | 0.348 | -1.522 | 0.000 | 0.000 |
| FBgn0038889 | 199.485   | 295.914   | 103.056   | 0.348 | -1.522 | 0.000 | 0.000 |
| FBgn0063368 | 60.618    | 89.899    | 31.337    | 0.349 | -1.520 | 0.000 | 0.002 |
| FBgn0027052 | 167.844   | 248.895   | 86.792    | 0.349 | -1.520 | 0.000 | 0.000 |
| FBgn0039165 | 221.837   | 328.910   | 114.764   | 0.349 | -1.519 | 0.000 | 0.000 |
| FBgn0037551 | 833.362   | 1235.220  | 431.505   | 0.349 | -1.517 | 0.000 | 0.003 |
| FBgn0050203 | 167.320   | 247.929   | 86.712    | 0.350 | -1.516 | 0.000 | 0.000 |
| FBgn0027103 | 345.582   | 512.041   | 179.123   | 0.350 | -1.515 | 0.000 | 0.000 |
| FBgn0036225 | 25.958    | 38.454    | 13.461    | 0.350 | -1.514 | 0.005 | 0.035 |
| FBgn0031689 | 4070.750  | 6029.694  | 2111.806  | 0.350 | -1.514 | 0.002 | 0.022 |
| FBgn0034380 | 233.641   | 346.047   | 121.235   | 0.350 | -1.513 | 0.000 | 0.001 |
| FBgn0036101 | 130.268   | 192.935   | 67.601    | 0.350 | -1.513 | 0.000 | 0.001 |
| FBgn0262741 | 83.163    | 123.158   | 43.167    | 0.351 | -1.512 | 0.000 | 0.002 |
| FBgn0037108 | 822.884   | 1217.994  | 427.775   | 0.351 | -1.510 | 0.000 | 0.001 |
| FBgn0051773 | 38.458    | 56.886    | 20.031    | 0.352 | -1.506 | 0.002 | 0.018 |
| FBgn0036356 | 119.852   | 177.246   | 62.458    | 0.352 | -1.505 | 0.003 | 0.025 |
| FBgn0037950 | 226.002   | 334.110   | 117.895   | 0.353 | -1.503 | 0.000 | 0.004 |
| FBgn0011693 | 24833.463 | 36697.514 | 12969.412 | 0.353 | -1.501 | 0.000 | 0.000 |
| FBgn0035689 | 88.127    | 130.222   | 46.033    | 0.353 | -1.500 | 0.001 | 0.012 |
| FBgn0032482 | 2558.453  | 3779.838  | 1337.068  | 0.354 | -1.499 | 0.000 | 0.000 |
| FBgn0051648 | 104.982   | 155.076   | 54.887    | 0.354 | -1.498 | 0.000 | 0.001 |
| FBgn0031738 | 450.316   | 665.147   | 235.486   | 0.354 | -1.498 | 0.005 | 0.036 |
| FBgn0014000 | 1937.177  | 2860.477  | 1013.877  | 0.354 | -1.496 | 0.000 | 0.000 |
| FBgn0085351 | 172.024   | 253.866   | 90.182    | 0.355 | -1.493 | 0.001 | 0.008 |
| FBgn0050476 | 153.512   | 226.412   | 80.611    | 0.356 | -1.490 | 0.005 | 0.038 |

|             |          |          |         |       |        |       |       |
|-------------|----------|----------|---------|-------|--------|-------|-------|
| FBgn0003278 | 101.349  | 149.435  | 53.264  | 0.356 | -1.488 | 0.000 | 0.001 |
| FBgn0032721 | 679.540  | 1001.507 | 357.572 | 0.357 | -1.486 | 0.000 | 0.000 |
| FBgn0031974 | 44.596   | 65.698   | 23.495  | 0.358 | -1.483 | 0.001 | 0.014 |
| FBgn0037921 | 42.277   | 62.275   | 22.279  | 0.358 | -1.483 | 0.002 | 0.018 |
| FBgn0033981 | 161.171  | 237.401  | 84.940  | 0.358 | -1.483 | 0.000 | 0.000 |
| FBgn0033906 | 1264.356 | 1862.189 | 666.523 | 0.358 | -1.482 | 0.000 | 0.002 |
| FBgn0028955 | 1591.213 | 2343.368 | 839.059 | 0.358 | -1.482 | 0.000 | 0.000 |
| FBgn0035959 | 609.862  | 897.564  | 322.161 | 0.359 | -1.478 | 0.000 | 0.001 |
| FBgn0030159 | 1163.479 | 1710.749 | 616.209 | 0.360 | -1.473 | 0.000 | 0.000 |
| FBgn0038195 | 1703.133 | 2504.148 | 902.119 | 0.360 | -1.473 | 0.000 | 0.000 |
| FBgn0260243 | 254.734  | 374.439  | 135.029 | 0.361 | -1.471 | 0.000 | 0.000 |
| FBgn0039004 | 127.326  | 187.124  | 67.527  | 0.361 | -1.470 | 0.000 | 0.000 |
| FBgn0036305 | 841.302  | 1234.980 | 447.625 | 0.362 | -1.464 | 0.000 | 0.000 |
| FBgn0037911 | 219.685  | 322.477  | 116.894 | 0.362 | -1.464 | 0.000 | 0.000 |
| FBgn0033775 | 77.068   | 112.988  | 41.148  | 0.364 | -1.457 | 0.000 | 0.006 |
| FBgn0002645 | 726.401  | 1064.627 | 388.175 | 0.365 | -1.456 | 0.000 | 0.000 |
| FBgn0037184 | 172.406  | 252.519  | 92.294  | 0.365 | -1.452 | 0.000 | 0.000 |
| FBgn0036553 | 316.908  | 463.949  | 169.867 | 0.366 | -1.450 | 0.000 | 0.000 |
| FBgn0034888 | 99.159   | 145.128  | 53.189  | 0.367 | -1.448 | 0.000 | 0.001 |
| FBgn0023416 | 1699.587 | 2486.943 | 912.232 | 0.367 | -1.447 | 0.000 | 0.000 |
| FBgn0033065 | 669.212  | 979.189  | 359.234 | 0.367 | -1.447 | 0.000 | 0.000 |
| FBgn0053234 | 122.776  | 179.618  | 65.934  | 0.367 | -1.446 | 0.000 | 0.001 |
| FBgn0039874 | 201.337  | 294.469  | 108.206 | 0.367 | -1.444 | 0.000 | 0.006 |
| FBgn0026760 | 102.607  | 149.912  | 55.301  | 0.369 | -1.439 | 0.001 | 0.011 |
| FBgn0051161 | 45.573   | 66.583   | 24.563  | 0.369 | -1.439 | 0.002 | 0.019 |
| FBgn0029714 | 174.112  | 254.237  | 93.986  | 0.370 | -1.436 | 0.000 | 0.004 |
| FBgn0039925 | 58.914   | 86.003   | 31.825  | 0.370 | -1.434 | 0.003 | 0.024 |
| FBgn0015569 | 160.584  | 234.401  | 86.767  | 0.370 | -1.434 | 0.000 | 0.000 |
| FBgn0000147 | 27.266   | 39.798   | 14.733  | 0.370 | -1.434 | 0.008 | 0.049 |
| FBgn0032242 | 534.554  | 780.129  | 288.978 | 0.370 | -1.433 | 0.000 | 0.000 |
| FBgn0033131 | 91.608   | 133.621  | 49.596  | 0.371 | -1.430 | 0.003 | 0.026 |
| FBgn0033240 | 113.438  | 165.376  | 61.501  | 0.372 | -1.427 | 0.000 | 0.001 |
| FBgn0034967 | 1420.185 | 2070.295 | 770.075 | 0.372 | -1.427 | 0.000 | 0.000 |
| FBgn0031389 | 175.459  | 255.771  | 95.147  | 0.372 | -1.427 | 0.001 | 0.013 |

|             |          |          |          |       |        |       |       |
|-------------|----------|----------|----------|-------|--------|-------|-------|
| FBgn0031970 | 249.249  | 363.184  | 135.313  | 0.373 | -1.424 | 0.000 | 0.000 |
| FBgn0032446 | 34.519   | 50.298   | 18.740   | 0.373 | -1.424 | 0.007 | 0.046 |
| FBgn0051633 | 82.499   | 120.181  | 44.816   | 0.373 | -1.423 | 0.000 | 0.002 |
| FBgn0039111 | 157.383  | 229.246  | 85.520   | 0.373 | -1.423 | 0.004 | 0.030 |
| FBgn0032477 | 747.273  | 1088.478 | 406.069  | 0.373 | -1.423 | 0.000 | 0.000 |
| FBgn0037236 | 59.561   | 86.735   | 32.386   | 0.373 | -1.421 | 0.001 | 0.008 |
| FBgn0031598 | 327.185  | 476.259  | 178.110  | 0.374 | -1.419 | 0.000 | 0.000 |
| FBgn0262647 | 226.638  | 329.897  | 123.378  | 0.374 | -1.419 | 0.000 | 0.001 |
| FBgn0024320 | 854.078  | 1242.296 | 465.859  | 0.375 | -1.415 | 0.000 | 0.000 |
| FBgn0024913 | 402.567  | 585.420  | 219.715  | 0.375 | -1.414 | 0.000 | 0.001 |
| FBgn0036290 | 208.035  | 302.485  | 113.585  | 0.376 | -1.413 | 0.000 | 0.006 |
| FBgn0263988 | 33.388   | 48.543   | 18.234   | 0.376 | -1.413 | 0.005 | 0.037 |
| FBgn0034136 | 205.762  | 299.106  | 112.417  | 0.376 | -1.412 | 0.000 | 0.004 |
| FBgn0038446 | 311.097  | 452.196  | 169.998  | 0.376 | -1.411 | 0.008 | 0.049 |
| FBgn0039640 | 281.443  | 408.999  | 153.887  | 0.376 | -1.410 | 0.000 | 0.004 |
| FBgn0034248 | 1576.100 | 2290.389 | 861.812  | 0.376 | -1.410 | 0.005 | 0.037 |
| FBgn0038551 | 283.830  | 412.428  | 155.233  | 0.376 | -1.410 | 0.000 | 0.000 |
| FBgn0040070 | 3422.939 | 4966.708 | 1879.171 | 0.378 | -1.402 | 0.002 | 0.017 |
| FBgn0051436 | 146.488  | 212.476  | 80.500   | 0.379 | -1.400 | 0.000 | 0.000 |
| FBgn0041191 | 1435.205 | 2080.848 | 789.561  | 0.379 | -1.398 | 0.000 | 0.001 |
| FBgn0260861 | 243.289  | 352.734  | 133.844  | 0.379 | -1.398 | 0.003 | 0.023 |
| FBgn0033569 | 139.273  | 201.887  | 76.659   | 0.380 | -1.397 | 0.000 | 0.001 |
| FBgn0031518 | 65.967   | 95.558   | 36.375   | 0.381 | -1.393 | 0.004 | 0.032 |
| FBgn0050491 | 242.395  | 351.125  | 133.664  | 0.381 | -1.393 | 0.000 | 0.000 |
| FBgn0035851 | 246.036  | 356.382  | 135.690  | 0.381 | -1.393 | 0.000 | 0.000 |
| FBgn0033809 | 220.622  | 319.558  | 121.686  | 0.381 | -1.393 | 0.001 | 0.010 |
| FBgn0062978 | 2838.388 | 4111.106 | 1565.671 | 0.381 | -1.393 | 0.001 | 0.012 |
| FBgn0036581 | 240.557  | 348.382  | 132.732  | 0.381 | -1.392 | 0.000 | 0.000 |
| FBgn0026620 | 2866.592 | 4149.868 | 1583.316 | 0.382 | -1.390 | 0.000 | 0.000 |
| FBgn0052262 | 260.527  | 377.042  | 144.013  | 0.382 | -1.389 | 0.000 | 0.000 |
| FBgn0036570 | 143.896  | 208.250  | 79.543   | 0.382 | -1.389 | 0.000 | 0.001 |
| FBgn0016983 | 833.256  | 1205.431 | 461.082  | 0.383 | -1.386 | 0.001 | 0.011 |
| FBgn0034509 | 264.564  | 382.675  | 146.452  | 0.383 | -1.386 | 0.000 | 0.003 |
| FBgn0044812 | 839.473  | 1214.229 | 464.717  | 0.383 | -1.386 | 0.000 | 0.000 |



|             |          |          |          |       |        |       |       |
|-------------|----------|----------|----------|-------|--------|-------|-------|
| FBgn0004513 | 967.541  | 1399.220 | 535.862  | 0.383 | -1.385 | 0.000 | 0.000 |
| FBgn0263864 | 489.792  | 708.284  | 271.299  | 0.383 | -1.384 | 0.000 | 0.000 |
| FBgn0261241 | 200.722  | 289.848  | 111.596  | 0.385 | -1.377 | 0.000 | 0.000 |
| FBgn0039218 | 349.312  | 504.397  | 194.228  | 0.385 | -1.377 | 0.006 | 0.043 |
| FBgn0051739 | 700.388  | 1011.224 | 389.553  | 0.385 | -1.376 | 0.000 | 0.000 |
| FBgn0027620 | 561.233  | 810.141  | 312.325  | 0.386 | -1.375 | 0.000 | 0.001 |
| FBgn0035213 | 286.028  | 412.816  | 159.240  | 0.386 | -1.374 | 0.000 | 0.000 |
| FBgn0027578 | 1234.774 | 1781.534 | 688.015  | 0.386 | -1.373 | 0.000 | 0.000 |
| FBgn0037105 | 116.873  | 168.615  | 65.131   | 0.386 | -1.372 | 0.000 | 0.003 |
| FBgn0031881 | 142.136  | 205.045  | 79.228   | 0.386 | -1.372 | 0.000 | 0.001 |
| FBgn0032008 | 2028.272 | 2924.779 | 1131.764 | 0.387 | -1.370 | 0.007 | 0.045 |
| FBgn0038173 | 285.339  | 411.327  | 159.352  | 0.387 | -1.368 | 0.000 | 0.000 |
| FBgn0038680 | 173.469  | 250.056  | 96.882   | 0.387 | -1.368 | 0.000 | 0.000 |
| FBgn0031634 | 59.965   | 86.439   | 33.492   | 0.387 | -1.368 | 0.001 | 0.012 |
| FBgn0037741 | 206.092  | 297.068  | 115.116  | 0.388 | -1.368 | 0.000 | 0.000 |
| FBgn0034705 | 46.244   | 66.654   | 25.835   | 0.388 | -1.367 | 0.002 | 0.020 |
| FBgn0051453 | 73.774   | 106.306  | 41.241   | 0.388 | -1.366 | 0.001 | 0.007 |
| FBgn0028552 | 1379.573 | 1987.760 | 771.385  | 0.388 | -1.366 | 0.000 | 0.000 |
| FBgn0025697 | 876.548  | 1262.506 | 490.589  | 0.389 | -1.364 | 0.000 | 0.000 |
| FBgn0034742 | 2029.852 | 2923.218 | 1136.486 | 0.389 | -1.363 | 0.000 | 0.000 |
| FBgn0034436 | 258.574  | 372.326  | 144.822  | 0.389 | -1.362 | 0.000 | 0.000 |
| FBgn0039907 | 1430.169 | 2057.972 | 802.365  | 0.390 | -1.359 | 0.000 | 0.000 |
| FBgn0038854 | 310.442  | 446.670  | 174.214  | 0.390 | -1.358 | 0.000 | 0.000 |
| FBgn0033542 | 125.404  | 180.361  | 70.448   | 0.391 | -1.356 | 0.005 | 0.037 |
| FBgn0037290 | 1341.167 | 1928.289 | 754.044  | 0.391 | -1.355 | 0.000 | 0.000 |
| FBgn0028961 | 185.059  | 265.976  | 104.143  | 0.392 | -1.353 | 0.000 | 0.001 |
| FBgn0036906 | 76.458   | 109.878  | 43.038   | 0.392 | -1.352 | 0.000 | 0.006 |
| FBgn0260461 | 39.563   | 56.848   | 22.279   | 0.392 | -1.351 | 0.004 | 0.029 |
| FBgn0032845 | 391.202  | 561.897  | 220.507  | 0.392 | -1.349 | 0.001 | 0.007 |
| FBgn0035170 | 1000.213 | 1436.359 | 564.068  | 0.393 | -1.348 | 0.000 | 0.000 |
| FBgn0038849 | 147.926  | 212.333  | 83.520   | 0.393 | -1.346 | 0.001 | 0.012 |
| FBgn0032943 | 297.446  | 426.896  | 167.996  | 0.394 | -1.345 | 0.000 | 0.004 |
| FBgn0032198 | 1557.242 | 2233.990 | 880.495  | 0.394 | -1.343 | 0.000 | 0.000 |
| FBgn0035906 | 1702.419 | 2442.013 | 962.825  | 0.394 | -1.343 | 0.002 | 0.016 |

|             |          |          |          |       |        |       |       |
|-------------|----------|----------|----------|-------|--------|-------|-------|
| FBgn0014007 | 242.919  | 348.185  | 137.653  | 0.395 | -1.339 | 0.000 | 0.000 |
| FBgn0022936 | 114.749  | 164.429  | 65.069   | 0.396 | -1.337 | 0.000 | 0.003 |
| FBgn0038547 | 121.134  | 173.562  | 68.706   | 0.396 | -1.337 | 0.001 | 0.009 |
| FBgn0036022 | 3651.389 | 5226.549 | 2076.229 | 0.397 | -1.332 | 0.000 | 0.000 |
| FBgn0260486 | 1612.995 | 2308.541 | 917.449  | 0.397 | -1.331 | 0.000 | 0.000 |
| FBgn0040339 | 139.221  | 199.220  | 79.222   | 0.398 | -1.330 | 0.000 | 0.001 |
| FBgn0000629 | 444.029  | 635.327  | 252.732  | 0.398 | -1.330 | 0.000 | 0.002 |
| FBgn0035461 | 99.588   | 142.491  | 56.684   | 0.398 | -1.330 | 0.000 | 0.002 |
| FBgn0013997 | 1249.573 | 1787.765 | 711.381  | 0.398 | -1.329 | 0.000 | 0.001 |
| FBgn0026787 | 320.001  | 457.798  | 182.204  | 0.398 | -1.329 | 0.000 | 0.000 |
| FBgn0011335 | 308.750  | 441.667  | 175.832  | 0.398 | -1.329 | 0.000 | 0.000 |
| FBgn0051032 | 41.393   | 59.199   | 23.587   | 0.398 | -1.328 | 0.005 | 0.038 |
| FBgn0037703 | 255.789  | 365.669  | 145.909  | 0.399 | -1.325 | 0.006 | 0.044 |
| FBgn0031631 | 127.193  | 181.790  | 72.596   | 0.399 | -1.324 | 0.000 | 0.001 |
| FBgn0040011 | 391.821  | 559.988  | 223.655  | 0.399 | -1.324 | 0.000 | 0.002 |
| FBgn0002924 | 152.757  | 218.185  | 87.329   | 0.400 | -1.321 | 0.000 | 0.001 |
| FBgn0031968 | 619.141  | 884.216  | 354.066  | 0.400 | -1.320 | 0.000 | 0.005 |
| FBgn0039637 | 1457.521 | 2079.153 | 835.890  | 0.402 | -1.315 | 0.000 | 0.004 |
| FBgn0036386 | 257.037  | 366.627  | 147.447  | 0.402 | -1.314 | 0.000 | 0.000 |
| FBgn0028539 | 888.146  | 1266.400 | 509.891  | 0.403 | -1.312 | 0.000 | 0.000 |
| FBgn0261999 | 847.830  | 1208.812 | 486.847  | 0.403 | -1.312 | 0.000 | 0.000 |
| FBgn0035936 | 1206.955 | 1720.586 | 693.325  | 0.403 | -1.311 | 0.000 | 0.000 |
| FBgn0263336 | 152.865  | 217.831  | 87.898   | 0.404 | -1.309 | 0.003 | 0.026 |
| FBgn0039302 | 2459.527 | 3503.073 | 1415.981 | 0.404 | -1.307 | 0.000 | 0.001 |
| FBgn0033194 | 2109.969 | 3004.847 | 1215.091 | 0.404 | -1.306 | 0.000 | 0.001 |
| FBgn0032498 | 141.299  | 201.221  | 81.377   | 0.404 | -1.306 | 0.000 | 0.001 |
| FBgn0035462 | 125.008  | 177.883  | 72.133   | 0.406 | -1.302 | 0.000 | 0.003 |
| FBgn0014342 | 41.630   | 59.203   | 24.057   | 0.406 | -1.299 | 0.004 | 0.029 |
| FBgn0034002 | 437.543  | 622.033  | 253.054  | 0.407 | -1.298 | 0.000 | 0.005 |
| FBgn0052076 | 168.631  | 239.715  | 97.548   | 0.407 | -1.297 | 0.000 | 0.003 |
| FBgn0002872 | 104.234  | 148.166  | 60.303   | 0.407 | -1.297 | 0.001 | 0.012 |
| FBgn0262473 | 1439.314 | 2044.637 | 833.991  | 0.408 | -1.294 | 0.000 | 0.000 |
| FBgn0023076 | 737.836  | 1047.732 | 427.941  | 0.408 | -1.292 | 0.000 | 0.000 |
| FBgn0034689 | 493.833  | 701.232  | 286.434  | 0.408 | -1.292 | 0.000 | 0.000 |

|             |          |          |          |       |        |       |       |
|-------------|----------|----------|----------|-------|--------|-------|-------|
| FBgn0004580 | 2648.606 | 3760.711 | 1536.502 | 0.409 | -1.291 | 0.001 | 0.008 |
| FBgn0015576 | 2222.538 | 3155.500 | 1289.576 | 0.409 | -1.291 | 0.000 | 0.000 |
| FBgn0031515 | 374.404  | 531.531  | 217.277  | 0.409 | -1.291 | 0.000 | 0.005 |
| FBgn0039115 | 117.998  | 167.512  | 68.484   | 0.409 | -1.290 | 0.002 | 0.021 |
| FBgn0032699 | 749.118  | 1061.843 | 436.393  | 0.411 | -1.283 | 0.000 | 0.000 |
| FBgn0034484 | 244.078  | 345.885  | 142.272  | 0.411 | -1.282 | 0.000 | 0.001 |
| FBgn0031752 | 1459.058 | 2067.613 | 850.502  | 0.411 | -1.282 | 0.000 | 0.000 |
| FBgn0002021 | 525.389  | 744.394  | 306.384  | 0.412 | -1.281 | 0.000 | 0.000 |
| FBgn0050424 | 73.910   | 104.707  | 43.112   | 0.412 | -1.280 | 0.001 | 0.007 |
| FBgn0051800 | 154.226  | 218.436  | 90.016   | 0.412 | -1.279 | 0.003 | 0.024 |
| FBgn0039993 | 258.427  | 365.877  | 150.978  | 0.413 | -1.277 | 0.002 | 0.015 |
| FBgn0019948 | 4369.752 | 6184.614 | 2554.890 | 0.413 | -1.275 | 0.000 | 0.000 |
| FBgn0033755 | 452.345  | 640.183  | 264.507  | 0.413 | -1.275 | 0.000 | 0.000 |
| FBgn0259247 | 260.415  | 368.549  | 152.282  | 0.413 | -1.275 | 0.001 | 0.009 |
| FBgn0041180 | 3486.170 | 4932.759 | 2039.582 | 0.413 | -1.274 | 0.000 | 0.000 |
| FBgn0035977 | 111.807  | 158.180  | 65.434   | 0.414 | -1.273 | 0.007 | 0.045 |
| FBgn0032017 | 45.196   | 63.922   | 26.471   | 0.414 | -1.272 | 0.003 | 0.023 |
| FBgn0037548 | 84.412   | 119.364  | 49.460   | 0.414 | -1.271 | 0.001 | 0.011 |
| FBgn0086895 | 247.495  | 349.846  | 145.144  | 0.415 | -1.269 | 0.000 | 0.001 |
| FBgn0037817 | 235.509  | 332.895  | 138.123  | 0.415 | -1.269 | 0.000 | 0.001 |
| FBgn0039932 | 87.488   | 123.645  | 51.330   | 0.415 | -1.268 | 0.000 | 0.005 |
| FBgn0037896 | 587.514  | 830.322  | 344.705  | 0.415 | -1.268 | 0.000 | 0.000 |
| FBgn0032243 | 160.607  | 226.950  | 94.264   | 0.415 | -1.268 | 0.005 | 0.034 |
| FBgn0031045 | 88.501   | 125.036  | 51.966   | 0.416 | -1.267 | 0.002 | 0.016 |
| FBgn0032472 | 634.867  | 896.879  | 372.855  | 0.416 | -1.266 | 0.000 | 0.000 |
| FBgn0031907 | 814.496  | 1149.207 | 479.785  | 0.417 | -1.260 | 0.002 | 0.018 |
| FBgn0013810 | 48.898   | 68.985   | 28.811   | 0.418 | -1.260 | 0.005 | 0.037 |
| FBgn0020392 | 338.369  | 477.250  | 199.487  | 0.418 | -1.258 | 0.000 | 0.000 |
| FBgn0033996 | 386.373  | 544.398  | 228.349  | 0.419 | -1.253 | 0.000 | 0.003 |
| FBgn0032644 | 282.359  | 397.666  | 167.052  | 0.420 | -1.251 | 0.002 | 0.016 |
| FBgn0000541 | 1638.497 | 2307.567 | 969.427  | 0.420 | -1.251 | 0.000 | 0.000 |
| FBgn0036000 | 123.666  | 174.130  | 73.202   | 0.420 | -1.250 | 0.004 | 0.028 |
| FBgn0038733 | 850.218  | 1196.924 | 503.512  | 0.421 | -1.249 | 0.000 | 0.000 |
| FBgn0034142 | 1570.477 | 2210.557 | 930.396  | 0.421 | -1.248 | 0.000 | 0.000 |

|             |           |           |           |       |        |       |       |
|-------------|-----------|-----------|-----------|-------|--------|-------|-------|
| FBgn0038463 | 578.363   | 813.712   | 343.014   | 0.422 | -1.246 | 0.000 | 0.001 |
| FBgn0037028 | 1747.419  | 2457.133  | 1037.704  | 0.422 | -1.244 | 0.001 | 0.011 |
| FBgn0025355 | 184.497   | 259.250   | 109.744   | 0.423 | -1.240 | 0.001 | 0.009 |
| FBgn0046113 | 52.579    | 73.877    | 31.281    | 0.423 | -1.240 | 0.005 | 0.037 |
| FBgn0035518 | 159.426   | 223.823   | 95.029    | 0.425 | -1.236 | 0.000 | 0.002 |
| FBgn0052220 | 93.783    | 131.556   | 56.011    | 0.426 | -1.232 | 0.001 | 0.008 |
| FBgn0031734 | 1830.626  | 2567.149  | 1094.103  | 0.426 | -1.230 | 0.000 | 0.000 |
| FBgn0034479 | 406.548   | 569.862   | 243.235   | 0.427 | -1.228 | 0.000 | 0.000 |
| FBgn0035812 | 73.077    | 102.424   | 43.729    | 0.427 | -1.228 | 0.001 | 0.014 |
| FBgn0029507 | 488.751   | 684.992   | 292.511   | 0.427 | -1.228 | 0.002 | 0.015 |
| FBgn0037106 | 118.954   | 166.713   | 71.195    | 0.427 | -1.228 | 0.000 | 0.006 |
| FBgn0261788 | 32952.075 | 46165.923 | 19738.227 | 0.428 | -1.226 | 0.000 | 0.000 |
| FBgn0000307 | 1560.455  | 2186.104  | 934.807   | 0.428 | -1.226 | 0.000 | 0.000 |
| FBgn0039904 | 747.623   | 1045.409  | 449.837   | 0.430 | -1.217 | 0.000 | 0.001 |
| FBgn0032956 | 890.122   | 1244.491  | 535.753   | 0.430 | -1.216 | 0.000 | 0.002 |
| FBgn0038140 | 75.886    | 106.092   | 45.681    | 0.431 | -1.216 | 0.002 | 0.017 |
| FBgn0033029 | 1188.649  | 1661.768  | 715.530   | 0.431 | -1.216 | 0.001 | 0.007 |
| FBgn0039203 | 104.215   | 145.638   | 62.791    | 0.431 | -1.214 | 0.001 | 0.010 |
| FBgn0028996 | 3038.465  | 4245.683  | 1831.248  | 0.431 | -1.213 | 0.000 | 0.002 |
| FBgn0034529 | 425.249   | 594.104   | 256.393   | 0.432 | -1.212 | 0.000 | 0.000 |
| FBgn0035150 | 135.406   | 189.132   | 81.680    | 0.432 | -1.211 | 0.002 | 0.019 |
| FBgn0259152 | 228.479   | 319.040   | 137.919   | 0.432 | -1.210 | 0.000 | 0.005 |
| FBgn0040010 | 539.044   | 751.783   | 326.304   | 0.434 | -1.204 | 0.000 | 0.000 |
| FBgn0031876 | 115.740   | 161.371   | 70.108    | 0.434 | -1.203 | 0.001 | 0.007 |
| FBgn0036888 | 1322.526  | 1843.731  | 801.321   | 0.435 | -1.202 | 0.000 | 0.000 |
| FBgn0039916 | 175.660   | 244.873   | 106.446   | 0.435 | -1.202 | 0.003 | 0.024 |
| FBgn0036886 | 198.116   | 276.139   | 120.092   | 0.435 | -1.201 | 0.000 | 0.002 |
| FBgn0030703 | 837.048   | 1166.587  | 507.509   | 0.435 | -1.201 | 0.000 | 0.000 |
| FBgn0037679 | 436.563   | 608.371   | 264.755   | 0.435 | -1.200 | 0.000 | 0.002 |
| FBgn0045035 | 163.596   | 227.821   | 99.370    | 0.436 | -1.197 | 0.000 | 0.003 |
| FBgn0033387 | 161.372   | 224.690   | 98.055    | 0.436 | -1.196 | 0.000 | 0.003 |
| FBgn0003719 | 50.488    | 70.257    | 30.719    | 0.437 | -1.194 | 0.002 | 0.021 |
| FBgn0035090 | 3124.481  | 4347.530  | 1901.432  | 0.437 | -1.193 | 0.000 | 0.000 |
| FBgn0036727 | 244.251   | 339.809   | 148.694   | 0.438 | -1.192 | 0.000 | 0.002 |

|             |          |          |          |       |        |       |       |
|-------------|----------|----------|----------|-------|--------|-------|-------|
| FBgn0039656 | 158.031  | 219.723  | 96.338   | 0.438 | -1.190 | 0.000 | 0.004 |
| FBgn0027512 | 1004.698 | 1396.553 | 612.844  | 0.439 | -1.188 | 0.000 | 0.006 |
| FBgn0028886 | 279.096  | 387.875  | 170.318  | 0.439 | -1.187 | 0.000 | 0.001 |
| FBgn0039965 | 547.879  | 761.290  | 334.467  | 0.439 | -1.187 | 0.000 | 0.000 |
| FBgn0039909 | 2814.261 | 3909.831 | 1718.690 | 0.440 | -1.186 | 0.000 | 0.000 |
| FBgn0038087 | 106.552  | 147.955  | 65.150   | 0.440 | -1.183 | 0.001 | 0.012 |
| FBgn0030706 | 4614.414 | 6407.032 | 2821.797 | 0.440 | -1.183 | 0.004 | 0.030 |
| FBgn0027783 | 95.050   | 131.933  | 58.166   | 0.441 | -1.182 | 0.005 | 0.036 |
| FBgn0000326 | 422.154  | 585.949  | 258.358  | 0.441 | -1.181 | 0.001 | 0.009 |
| FBgn0031216 | 312.691  | 433.983  | 191.398  | 0.441 | -1.181 | 0.001 | 0.012 |
| FBgn0031948 | 439.504  | 609.850  | 269.158  | 0.441 | -1.180 | 0.000 | 0.001 |
| FBgn0032881 | 857.888  | 1189.930 | 525.847  | 0.442 | -1.178 | 0.001 | 0.012 |
| FBgn0036205 | 75.916   | 105.292  | 46.539   | 0.442 | -1.178 | 0.003 | 0.024 |
| FBgn0067779 | 420.534  | 583.229  | 257.838  | 0.442 | -1.178 | 0.000 | 0.003 |
| FBgn0034365 | 189.261  | 262.475  | 116.048  | 0.442 | -1.177 | 0.000 | 0.003 |
| FBgn0003210 | 993.355  | 1377.326 | 609.384  | 0.442 | -1.176 | 0.000 | 0.000 |
| FBgn0025781 | 146.883  | 203.626  | 90.139   | 0.443 | -1.176 | 0.000 | 0.004 |
| FBgn0034075 | 1258.252 | 1744.306 | 772.198  | 0.443 | -1.176 | 0.000 | 0.000 |
| FBgn0038202 | 290.135  | 402.197  | 178.073  | 0.443 | -1.175 | 0.000 | 0.002 |
| FBgn0053653 | 1301.139 | 1801.471 | 800.808  | 0.445 | -1.170 | 0.006 | 0.044 |
| FBgn0015570 | 1123.961 | 1556.001 | 691.922  | 0.445 | -1.169 | 0.000 | 0.000 |
| FBgn0036892 | 954.730  | 1321.092 | 588.367  | 0.445 | -1.167 | 0.000 | 0.000 |
| FBgn0003742 | 321.573  | 444.967  | 198.178  | 0.445 | -1.167 | 0.000 | 0.002 |
| FBgn0037633 | 147.180  | 203.653  | 90.707   | 0.445 | -1.167 | 0.001 | 0.006 |
| FBgn0034602 | 552.503  | 764.443  | 340.562  | 0.446 | -1.166 | 0.003 | 0.026 |
| FBgn0004620 | 98.403   | 136.115  | 60.691   | 0.446 | -1.165 | 0.001 | 0.010 |
| FBgn0032054 | 190.075  | 262.767  | 117.382  | 0.447 | -1.163 | 0.000 | 0.004 |
| FBgn0034716 | 1079.367 | 1491.443 | 667.291  | 0.447 | -1.160 | 0.000 | 0.000 |
| FBgn0036993 | 596.906  | 824.762  | 369.051  | 0.447 | -1.160 | 0.000 | 0.001 |
| FBgn0002736 | 456.444  | 630.634  | 282.254  | 0.448 | -1.160 | 0.000 | 0.001 |
| FBgn0033980 | 298.999  | 413.078  | 184.921  | 0.448 | -1.160 | 0.000 | 0.001 |
| FBgn0261268 | 1069.003 | 1476.425 | 661.581  | 0.448 | -1.158 | 0.000 | 0.001 |
| FBgn0030695 | 347.184  | 479.097  | 215.270  | 0.449 | -1.154 | 0.001 | 0.009 |
| FBgn0010407 | 64.276   | 88.675   | 39.877   | 0.450 | -1.153 | 0.005 | 0.038 |

|             |          |          |         |       |        |       |       |
|-------------|----------|----------|---------|-------|--------|-------|-------|
| FBgn0032509 | 1312.123 | 1808.830 | 815.416 | 0.451 | -1.149 | 0.000 | 0.003 |
| FBgn0038366 | 161.837  | 223.051  | 100.624 | 0.451 | -1.148 | 0.001 | 0.008 |
| FBgn0032907 | 72.268   | 99.589   | 44.946  | 0.451 | -1.148 | 0.003 | 0.024 |
| FBgn0037794 | 118.027  | 162.593  | 73.461  | 0.452 | -1.146 | 0.004 | 0.029 |
| FBgn0032924 | 598.578  | 824.565  | 372.591 | 0.452 | -1.146 | 0.000 | 0.004 |
| FBgn0037240 | 1528.789 | 2105.738 | 951.841 | 0.452 | -1.146 | 0.000 | 0.000 |
| FBgn0003169 | 1276.763 | 1758.510 | 795.016 | 0.452 | -1.145 | 0.000 | 0.000 |
| FBgn0035113 | 188.569  | 259.589  | 117.549 | 0.453 | -1.143 | 0.001 | 0.008 |
| FBgn0033698 | 669.149  | 920.787  | 417.511 | 0.453 | -1.141 | 0.000 | 0.000 |
| FBgn0036462 | 386.796  | 532.221  | 241.371 | 0.454 | -1.141 | 0.000 | 0.001 |
| FBgn0038862 | 1070.374 | 1472.529 | 668.218 | 0.454 | -1.140 | 0.000 | 0.001 |
| FBgn0052112 | 557.194  | 766.212  | 348.176 | 0.454 | -1.138 | 0.004 | 0.031 |
| FBgn0039930 | 805.532  | 1107.537 | 503.526 | 0.455 | -1.137 | 0.007 | 0.046 |
| FBgn0028992 | 267.991  | 368.351  | 167.632 | 0.455 | -1.136 | 0.006 | 0.042 |
| FBgn0032264 | 443.691  | 609.716  | 277.666 | 0.455 | -1.135 | 0.000 | 0.001 |
| FBgn0040259 | 908.368  | 1248.131 | 568.606 | 0.456 | -1.134 | 0.000 | 0.001 |
| FBgn0036020 | 432.442  | 594.140  | 270.744 | 0.456 | -1.134 | 0.000 | 0.002 |
| FBgn0052104 | 85.781   | 117.854  | 53.708  | 0.456 | -1.134 | 0.002 | 0.019 |
| FBgn0037489 | 179.654  | 246.809  | 112.498 | 0.456 | -1.133 | 0.006 | 0.042 |
| FBgn0051957 | 65.770   | 90.355   | 41.186  | 0.456 | -1.133 | 0.006 | 0.040 |
| FBgn0262955 | 658.717  | 904.831  | 412.602 | 0.456 | -1.133 | 0.000 | 0.001 |
| FBgn0026374 | 333.677  | 458.313  | 209.040 | 0.456 | -1.133 | 0.000 | 0.001 |
| FBgn0011660 | 87.022   | 119.490  | 54.554  | 0.457 | -1.131 | 0.003 | 0.026 |
| FBgn0039234 | 439.472  | 603.372  | 275.573 | 0.457 | -1.131 | 0.000 | 0.001 |
| FBgn0032258 | 346.845  | 476.037  | 217.654 | 0.457 | -1.129 | 0.000 | 0.006 |
| FBgn0026427 | 754.561  | 1035.076 | 474.047 | 0.458 | -1.127 | 0.000 | 0.001 |
| FBgn0032169 | 210.273  | 288.431  | 132.115 | 0.458 | -1.126 | 0.000 | 0.005 |
| FBgn0034053 | 286.513  | 392.996  | 180.030 | 0.458 | -1.126 | 0.000 | 0.001 |
| FBgn0032116 | 116.615  | 159.935  | 73.294  | 0.458 | -1.126 | 0.007 | 0.047 |
| FBgn0050007 | 84.334   | 115.652  | 53.016  | 0.458 | -1.125 | 0.005 | 0.037 |
| FBgn0031589 | 1203.281 | 1649.855 | 756.708 | 0.459 | -1.125 | 0.000 | 0.000 |
| FBgn0036198 | 493.141  | 676.027  | 310.256 | 0.459 | -1.124 | 0.000 | 0.002 |
| FBgn0008651 | 89.051   | 122.036  | 56.066  | 0.459 | -1.122 | 0.001 | 0.014 |
| FBgn0038681 | 1120.009 | 1534.227 | 705.791 | 0.460 | -1.120 | 0.000 | 0.000 |

|             |           |           |          |       |        |       |       |
|-------------|-----------|-----------|----------|-------|--------|-------|-------|
| FBgn0020240 | 1199.463  | 1642.941  | 755.985  | 0.460 | -1.120 | 0.000 | 0.000 |
| FBgn0034182 | 274.103   | 375.177   | 173.028  | 0.461 | -1.117 | 0.000 | 0.004 |
| FBgn0002431 | 2926.788  | 4005.416  | 1848.161 | 0.461 | -1.116 | 0.000 | 0.000 |
| FBgn0038279 | 459.146   | 628.239   | 290.052  | 0.462 | -1.115 | 0.001 | 0.011 |
| FBgn0051068 | 146.862   | 200.887   | 92.837   | 0.462 | -1.114 | 0.001 | 0.009 |
| FBgn0034114 | 235.729   | 322.381   | 149.077  | 0.462 | -1.113 | 0.005 | 0.034 |
| FBgn0010424 | 65.276    | 89.219    | 41.334   | 0.463 | -1.110 | 0.003 | 0.027 |
| FBgn0038233 | 135.676   | 185.369   | 85.983   | 0.464 | -1.108 | 0.001 | 0.007 |
| FBgn0036715 | 162.444   | 221.925   | 102.964  | 0.464 | -1.108 | 0.001 | 0.008 |
| FBgn0086906 | 10252.123 | 14004.148 | 6500.099 | 0.464 | -1.107 | 0.000 | 0.000 |
| FBgn0033491 | 118.370   | 161.650   | 75.091   | 0.465 | -1.106 | 0.002 | 0.017 |
| FBgn0050104 | 379.080   | 517.597   | 240.562  | 0.465 | -1.105 | 0.000 | 0.002 |
| FBgn0263600 | 132.278   | 180.591   | 83.964   | 0.465 | -1.105 | 0.001 | 0.013 |
| FBgn0036376 | 531.179   | 724.816   | 337.543  | 0.466 | -1.103 | 0.000 | 0.001 |
| FBgn0261274 | 588.249   | 802.581   | 373.917  | 0.466 | -1.102 | 0.000 | 0.001 |
| FBgn0027565 | 609.455   | 831.488   | 387.421  | 0.466 | -1.102 | 0.006 | 0.040 |
| FBgn0020440 | 968.009   | 1320.463  | 615.555  | 0.466 | -1.101 | 0.000 | 0.003 |
| FBgn0019650 | 1037.459  | 1415.036  | 659.883  | 0.466 | -1.101 | 0.008 | 0.050 |
| FBgn0037619 | 97.962    | 133.583   | 62.340   | 0.467 | -1.100 | 0.002 | 0.018 |
| FBgn0038376 | 1174.461  | 1600.777  | 748.144  | 0.467 | -1.097 | 0.000 | 0.001 |
| FBgn0031995 | 3094.073  | 4216.894  | 1971.253 | 0.467 | -1.097 | 0.000 | 0.001 |
| FBgn0037012 | 94.150    | 128.299   | 60.000   | 0.468 | -1.096 | 0.006 | 0.042 |
| FBgn0039727 | 256.259   | 349.091   | 163.426  | 0.468 | -1.095 | 0.000 | 0.003 |
| FBgn0032259 | 430.070   | 585.747   | 274.393  | 0.468 | -1.094 | 0.000 | 0.002 |
| FBgn0032208 | 5850.211  | 7964.699  | 3735.724 | 0.469 | -1.092 | 0.000 | 0.001 |
| FBgn0032030 | 483.378   | 657.792   | 308.965  | 0.470 | -1.090 | 0.000 | 0.001 |
| FBgn0039711 | 194.459   | 264.570   | 124.347  | 0.470 | -1.089 | 0.001 | 0.010 |
| FBgn0032409 | 433.190   | 589.140   | 277.240  | 0.471 | -1.087 | 0.000 | 0.002 |
| FBgn0083969 | 757.028   | 1029.346  | 484.710  | 0.471 | -1.087 | 0.000 | 0.001 |
| FBgn0035515 | 411.477   | 559.477   | 263.476  | 0.471 | -1.086 | 0.000 | 0.002 |
| FBgn0036124 | 381.632   | 518.763   | 244.502  | 0.471 | -1.085 | 0.000 | 0.005 |
| FBgn0037652 | 192.768   | 261.923   | 123.612  | 0.472 | -1.083 | 0.001 | 0.006 |
| FBgn0034628 | 589.792   | 801.375   | 378.209  | 0.472 | -1.083 | 0.000 | 0.001 |
| FBgn0037739 | 183.702   | 249.596   | 117.808  | 0.472 | -1.083 | 0.001 | 0.012 |

|             |           |           |           |       |        |       |       |
|-------------|-----------|-----------|-----------|-------|--------|-------|-------|
| FBgn0013953 | 143.499   | 194.933   | 92.065    | 0.472 | -1.082 | 0.001 | 0.012 |
| FBgn0030366 | 3424.201  | 4649.977  | 2198.424  | 0.473 | -1.081 | 0.000 | 0.001 |
| FBgn0263852 | 232.810   | 316.141   | 149.479   | 0.473 | -1.081 | 0.007 | 0.046 |
| FBgn0020616 | 449.512   | 610.393   | 288.632   | 0.473 | -1.081 | 0.000 | 0.004 |
| FBgn0039296 | 270.327   | 367.076   | 173.578   | 0.473 | -1.080 | 0.000 | 0.004 |
| FBgn0033757 | 358.723   | 487.023   | 230.423   | 0.473 | -1.080 | 0.000 | 0.004 |
| FBgn0036771 | 133.673   | 181.456   | 85.891    | 0.473 | -1.079 | 0.001 | 0.015 |
| FBgn0037098 | 4278.050  | 5805.346  | 2750.753  | 0.474 | -1.078 | 0.000 | 0.001 |
| FBgn0053056 | 576.973   | 782.598   | 371.349   | 0.475 | -1.075 | 0.001 | 0.012 |
| FBgn0037447 | 818.992   | 1110.723  | 527.260   | 0.475 | -1.075 | 0.000 | 0.001 |
| FBgn0022238 | 1846.487  | 2504.095  | 1188.879  | 0.475 | -1.075 | 0.001 | 0.014 |
| FBgn0034494 | 747.457   | 1013.384  | 481.531   | 0.475 | -1.073 | 0.000 | 0.001 |
| FBgn0024491 | 272.390   | 369.158   | 175.622   | 0.476 | -1.072 | 0.005 | 0.036 |
| FBgn0040079 | 807.225   | 1093.715  | 520.734   | 0.476 | -1.071 | 0.000 | 0.001 |
| FBgn0038465 | 1035.347  | 1402.457  | 668.238   | 0.476 | -1.070 | 0.001 | 0.011 |
| FBgn0031906 | 96.526    | 130.712   | 62.340    | 0.477 | -1.068 | 0.004 | 0.028 |
| FBgn0038857 | 331.989   | 449.547   | 214.430   | 0.477 | -1.068 | 0.000 | 0.004 |
| FBgn0000559 | 50187.561 | 67940.937 | 32434.185 | 0.477 | -1.067 | 0.007 | 0.044 |
| FBgn0027582 | 650.895   | 881.087   | 420.703   | 0.477 | -1.066 | 0.000 | 0.001 |
| FBgn0037894 | 388.667   | 526.096   | 251.238   | 0.478 | -1.066 | 0.000 | 0.002 |
| FBgn0035833 | 628.572   | 850.712   | 406.433   | 0.478 | -1.066 | 0.000 | 0.004 |
| FBgn0002931 | 171.912   | 232.604   | 111.219   | 0.478 | -1.064 | 0.002 | 0.019 |
| FBgn0036893 | 381.312   | 515.882   | 246.742   | 0.478 | -1.064 | 0.000 | 0.003 |
| FBgn0039595 | 94.432    | 127.721   | 61.142    | 0.479 | -1.063 | 0.004 | 0.030 |
| FBgn0038532 | 161.803   | 218.753   | 104.853   | 0.479 | -1.061 | 0.001 | 0.010 |
| FBgn0014075 | 844.932   | 1142.177  | 547.687   | 0.480 | -1.060 | 0.000 | 0.001 |
| FBgn0036662 | 328.317   | 443.734   | 212.899   | 0.480 | -1.060 | 0.004 | 0.032 |
| FBgn0035849 | 459.763   | 621.291   | 298.235   | 0.480 | -1.059 | 0.005 | 0.034 |
| FBgn0036772 | 85.200    | 115.119   | 55.282    | 0.480 | -1.058 | 0.003 | 0.026 |
| FBgn0034214 | 91.339    | 123.406   | 59.271    | 0.480 | -1.058 | 0.005 | 0.039 |
| FBgn0037368 | 79.436    | 107.313   | 51.559    | 0.480 | -1.058 | 0.008 | 0.049 |
| FBgn0002778 | 596.823   | 805.693   | 387.953   | 0.482 | -1.054 | 0.000 | 0.001 |
| FBgn0022029 | 503.995   | 680.233   | 327.756   | 0.482 | -1.053 | 0.000 | 0.003 |
| FBgn0010482 | 1502.852  | 2027.900  | 977.803   | 0.482 | -1.052 | 0.000 | 0.001 |



|             |           |           |          |       |        |       |       |
|-------------|-----------|-----------|----------|-------|--------|-------|-------|
| FBgn0033347 | 370.396   | 499.725   | 241.068  | 0.482 | -1.052 | 0.000 | 0.003 |
| FBgn0040283 | 783.928   | 1057.618  | 510.238  | 0.482 | -1.052 | 0.000 | 0.001 |
| FBgn0034109 | 180.934   | 244.061   | 117.808  | 0.483 | -1.051 | 0.001 | 0.009 |
| FBgn0036571 | 261.251   | 352.344   | 170.158  | 0.483 | -1.050 | 0.000 | 0.005 |
| FBgn0031985 | 2204.389  | 2971.961  | 1436.816 | 0.483 | -1.049 | 0.000 | 0.001 |
| FBgn0023479 | 8953.680  | 12057.961 | 5849.399 | 0.485 | -1.044 | 0.000 | 0.001 |
| FBgn0064237 | 389.238   | 524.119   | 254.356  | 0.485 | -1.043 | 0.000 | 0.002 |
| FBgn0011230 | 6980.790  | 9398.569  | 4563.012 | 0.486 | -1.042 | 0.000 | 0.001 |
| FBgn0034073 | 92.359    | 124.342   | 60.377   | 0.486 | -1.042 | 0.006 | 0.040 |
| FBgn0038638 | 157.304   | 211.755   | 102.853  | 0.486 | -1.042 | 0.002 | 0.015 |
| FBgn0028406 | 366.170   | 492.883   | 239.456  | 0.486 | -1.041 | 0.003 | 0.025 |
| FBgn0035923 | 115.291   | 155.175   | 75.406   | 0.486 | -1.041 | 0.002 | 0.017 |
| FBgn0016078 | 1021.559  | 1374.778  | 668.340  | 0.486 | -1.041 | 0.001 | 0.006 |
| FBgn0015338 | 385.072   | 518.097   | 252.047  | 0.486 | -1.040 | 0.006 | 0.040 |
| FBgn0085420 | 302.678   | 407.085   | 198.271  | 0.487 | -1.038 | 0.001 | 0.007 |
| FBgn0037963 | 1286.678  | 1730.463  | 842.893  | 0.487 | -1.038 | 0.000 | 0.001 |
| FBgn0003268 | 94.018    | 126.425   | 61.612   | 0.487 | -1.037 | 0.003 | 0.022 |
| FBgn0031251 | 181.929   | 244.612   | 119.246  | 0.487 | -1.037 | 0.001 | 0.012 |
| FBgn0024230 | 401.319   | 539.551   | 263.087  | 0.488 | -1.036 | 0.002 | 0.015 |
| FBgn0053506 | 126.305   | 169.714   | 82.896   | 0.488 | -1.034 | 0.002 | 0.020 |
| FBgn0038968 | 168.266   | 226.004   | 110.528  | 0.489 | -1.032 | 0.001 | 0.012 |
| FBgn0038436 | 87.100    | 116.973   | 57.227   | 0.489 | -1.031 | 0.004 | 0.029 |
| FBgn0015765 | 194.601   | 261.287   | 127.916  | 0.490 | -1.030 | 0.001 | 0.013 |
| FBgn0033376 | 245.951   | 330.191   | 161.710  | 0.490 | -1.030 | 0.002 | 0.020 |
| FBgn0037792 | 171.729   | 230.386   | 113.072  | 0.491 | -1.027 | 0.001 | 0.013 |
| FBgn0038639 | 326.595   | 438.086   | 215.103  | 0.491 | -1.026 | 0.001 | 0.013 |
| FBgn0022268 | 1006.819  | 1350.397  | 663.241  | 0.491 | -1.026 | 0.000 | 0.002 |
| FBgn0000370 | 12168.717 | 16320.780 | 8016.655 | 0.491 | -1.026 | 0.000 | 0.001 |
| FBgn0064225 | 9274.147  | 12429.259 | 6119.036 | 0.492 | -1.022 | 0.001 | 0.006 |
| FBgn0027055 | 428.773   | 574.459   | 283.087  | 0.493 | -1.021 | 0.001 | 0.008 |
| FBgn0032790 | 151.006   | 202.302   | 99.710   | 0.493 | -1.021 | 0.002 | 0.020 |
| FBgn0051040 | 508.784   | 681.459   | 336.109  | 0.493 | -1.020 | 0.000 | 0.003 |
| FBgn0004698 | 1197.399  | 1603.610  | 791.187  | 0.493 | -1.019 | 0.001 | 0.009 |
| FBgn0032014 | 114.772   | 153.539   | 76.005   | 0.495 | -1.014 | 0.002 | 0.017 |

|             |          |          |          |       |        |       |       |
|-------------|----------|----------|----------|-------|--------|-------|-------|
| FBgn0086757 | 640.915  | 857.124  | 424.705  | 0.496 | -1.013 | 0.001 | 0.007 |
| FBgn0030418 | 179.965  | 240.665  | 119.265  | 0.496 | -1.013 | 0.002 | 0.016 |
| FBgn0024921 | 1586.822 | 2119.994 | 1053.651 | 0.497 | -1.009 | 0.000 | 0.003 |
| FBgn0003076 | 4516.484 | 6032.653 | 3000.314 | 0.497 | -1.008 | 0.001 | 0.009 |
| FBgn0037536 | 2232.481 | 2980.508 | 1484.455 | 0.498 | -1.006 | 0.000 | 0.002 |
| FBgn0030217 | 100.674  | 134.383  | 66.965   | 0.498 | -1.005 | 0.004 | 0.032 |
| FBgn0260407 | 271.915  | 362.910  | 180.920  | 0.499 | -1.004 | 0.002 | 0.015 |
| FBgn0263316 | 439.714  | 586.820  | 292.609  | 0.499 | -1.004 | 0.000 | 0.004 |
| FBgn0027603 | 1222.357 | 1631.012 | 813.701  | 0.499 | -1.003 | 0.000 | 0.002 |
| FBgn0024836 | 1690.997 | 2255.221 | 1126.772 | 0.500 | -1.001 | 0.001 | 0.008 |
| FBgn0085378 | 301.853  | 402.404  | 201.303  | 0.500 | -0.999 | 0.005 | 0.039 |
| FBgn0033075 | 315.617  | 420.699  | 210.534  | 0.500 | -0.999 | 0.000 | 0.006 |
| FBgn0034400 | 2433.992 | 3244.213 | 1623.771 | 0.501 | -0.999 | 0.000 | 0.001 |
| FBgn0032204 | 158.141  | 210.737  | 105.545  | 0.501 | -0.998 | 0.002 | 0.020 |
| FBgn0014018 | 1299.226 | 1731.308 | 867.145  | 0.501 | -0.998 | 0.001 | 0.009 |
| FBgn0033989 | 497.346  | 662.732  | 331.960  | 0.501 | -0.997 | 0.001 | 0.009 |
| FBgn0036627 | 113.259  | 150.871  | 75.646   | 0.501 | -0.996 | 0.004 | 0.028 |
| FBgn0004366 | 2053.160 | 2734.688 | 1371.632 | 0.502 | -0.995 | 0.002 | 0.019 |
| FBgn0021856 | 651.190  | 867.153  | 435.227  | 0.502 | -0.995 | 0.000 | 0.005 |
| FBgn0010339 | 382.437  | 508.981  | 255.894  | 0.503 | -0.992 | 0.001 | 0.008 |
| FBgn0015609 | 5070.077 | 6745.136 | 3395.018 | 0.503 | -0.990 | 0.000 | 0.001 |
| FBgn0036615 | 159.072  | 211.604  | 106.539  | 0.503 | -0.990 | 0.003 | 0.026 |
| FBgn0036333 | 308.504  | 410.382  | 206.626  | 0.503 | -0.990 | 0.004 | 0.030 |
| FBgn0052645 | 96.255   | 128.021  | 64.489   | 0.504 | -0.989 | 0.004 | 0.030 |
| FBgn0032723 | 465.740  | 619.348  | 312.133  | 0.504 | -0.989 | 0.000 | 0.004 |
| FBgn0037808 | 6224.856 | 8276.545 | 4173.167 | 0.504 | -0.988 | 0.000 | 0.003 |
| FBgn0027111 | 3462.245 | 4603.109 | 2321.382 | 0.504 | -0.988 | 0.000 | 0.004 |
| FBgn0038296 | 153.615  | 204.229  | 103.001  | 0.504 | -0.988 | 0.002 | 0.016 |
| FBgn0032940 | 1615.725 | 2147.392 | 1084.057 | 0.505 | -0.986 | 0.000 | 0.003 |
| FBgn0032120 | 819.870  | 1089.065 | 550.675  | 0.506 | -0.984 | 0.000 | 0.003 |
| FBgn0038816 | 1499.893 | 1991.618 | 1008.168 | 0.506 | -0.982 | 0.002 | 0.016 |
| FBgn0033897 | 1237.969 | 1643.403 | 832.536  | 0.507 | -0.981 | 0.001 | 0.009 |
| FBgn0263986 | 387.043  | 513.752  | 260.333  | 0.507 | -0.981 | 0.001 | 0.007 |
| FBgn0026060 | 125.371  | 166.291  | 84.452   | 0.508 | -0.978 | 0.006 | 0.041 |

|             |           |           |           |       |        |       |       |
|-------------|-----------|-----------|-----------|-------|--------|-------|-------|
| FBgn0034270 | 87.216    | 115.666   | 58.765    | 0.508 | -0.977 | 0.008 | 0.049 |
| FBgn0037831 | 297.437   | 394.306   | 200.567   | 0.509 | -0.975 | 0.001 | 0.007 |
| FBgn0031972 | 724.420   | 960.104   | 488.736   | 0.509 | -0.974 | 0.000 | 0.005 |
| FBgn0024248 | 1252.539  | 1659.866  | 845.211   | 0.509 | -0.974 | 0.002 | 0.019 |
| FBgn0262707 | 798.306   | 1057.910  | 538.702   | 0.509 | -0.974 | 0.000 | 0.003 |
| FBgn0039164 | 243.391   | 322.473   | 164.310   | 0.510 | -0.973 | 0.001 | 0.014 |
| FBgn0036317 | 1140.491  | 1510.318  | 770.663   | 0.510 | -0.971 | 0.002 | 0.021 |
| FBgn0036974 | 994.759   | 1317.090  | 672.428   | 0.511 | -0.970 | 0.000 | 0.003 |
| FBgn0012051 | 940.948   | 1245.286  | 636.610   | 0.511 | -0.968 | 0.006 | 0.040 |
| FBgn0036448 | 3037.915  | 4019.740  | 2056.090  | 0.511 | -0.967 | 0.000 | 0.002 |
| FBgn0039265 | 526.993   | 697.266   | 356.721   | 0.512 | -0.967 | 0.001 | 0.007 |
| FBgn0001075 | 299.841   | 396.712   | 202.970   | 0.512 | -0.967 | 0.001 | 0.010 |
| FBgn0001179 | 329.482   | 435.908   | 223.056   | 0.512 | -0.967 | 0.001 | 0.009 |
| FBgn0033132 | 10358.517 | 13703.589 | 7013.446  | 0.512 | -0.966 | 0.003 | 0.022 |
| FBgn0031229 | 371.900   | 491.636   | 252.164   | 0.513 | -0.963 | 0.001 | 0.009 |
| FBgn0262512 | 2306.939  | 3048.711  | 1565.168  | 0.513 | -0.962 | 0.004 | 0.034 |
| FBgn0040271 | 1440.481  | 1902.864  | 978.098   | 0.514 | -0.960 | 0.001 | 0.006 |
| FBgn0004227 | 1857.687  | 2453.807  | 1261.567  | 0.514 | -0.960 | 0.000 | 0.005 |
| FBgn0037250 | 228.268   | 301.494   | 155.041   | 0.514 | -0.959 | 0.001 | 0.011 |
| FBgn0086690 | 2814.584  | 3716.007  | 1913.161  | 0.515 | -0.958 | 0.000 | 0.002 |
| FBgn0086475 | 310.094   | 409.359   | 210.830   | 0.515 | -0.957 | 0.001 | 0.009 |
| FBgn0034474 | 1458.566  | 1925.372  | 991.760   | 0.515 | -0.957 | 0.001 | 0.007 |
| FBgn0023528 | 1448.728  | 1912.141  | 985.315   | 0.515 | -0.957 | 0.001 | 0.007 |
| FBgn0021761 | 238.369   | 314.577   | 162.161   | 0.515 | -0.956 | 0.001 | 0.010 |
| FBgn0037378 | 345.440   | 455.869   | 235.011   | 0.516 | -0.956 | 0.003 | 0.026 |
| FBgn0032979 | 994.885   | 1312.900  | 676.870   | 0.516 | -0.956 | 0.004 | 0.030 |
| FBgn0015477 | 1241.640  | 1638.206  | 845.075   | 0.516 | -0.955 | 0.003 | 0.022 |
| FBgn0030717 | 256.377   | 338.244   | 174.510   | 0.516 | -0.955 | 0.002 | 0.015 |
| FBgn0035702 | 111.604   | 147.241   | 75.968    | 0.516 | -0.955 | 0.006 | 0.040 |
| FBgn0037117 | 334.569   | 441.382   | 227.755   | 0.516 | -0.955 | 0.001 | 0.011 |
| FBgn0002938 | 71959.052 | 94925.816 | 48992.288 | 0.516 | -0.954 | 0.000 | 0.004 |
| FBgn0263048 | 137.360   | 181.061   | 93.658    | 0.517 | -0.951 | 0.003 | 0.027 |
| FBgn0041710 | 99.794    | 131.518   | 68.070    | 0.518 | -0.950 | 0.008 | 0.050 |
| FBgn0003732 | 841.011   | 1108.198  | 573.824   | 0.518 | -0.950 | 0.000 | 0.004 |

|             |          |           |          |       |        |       |       |
|-------------|----------|-----------|----------|-------|--------|-------|-------|
| FBgn0085335 | 4699.688 | 6192.470  | 3206.906 | 0.518 | -0.949 | 0.000 | 0.002 |
| FBgn0031692 | 6169.090 | 8127.021  | 4211.159 | 0.518 | -0.949 | 0.000 | 0.002 |
| FBgn0263241 | 351.719  | 463.284   | 240.154  | 0.518 | -0.948 | 0.001 | 0.009 |
| FBgn0036614 | 198.927  | 262.015   | 135.838  | 0.518 | -0.948 | 0.002 | 0.018 |
| FBgn0029114 | 257.116  | 338.543   | 175.690  | 0.519 | -0.946 | 0.002 | 0.015 |
| FBgn0032194 | 122.078  | 160.735   | 83.421   | 0.519 | -0.946 | 0.005 | 0.037 |
| FBgn0027526 | 316.649  | 416.397   | 216.900  | 0.521 | -0.941 | 0.002 | 0.017 |
| FBgn0052441 | 855.056  | 1124.408  | 585.704  | 0.521 | -0.941 | 0.001 | 0.006 |
| FBgn0030854 | 410.277  | 539.498   | 281.056  | 0.521 | -0.941 | 0.001 | 0.009 |
| FBgn0035206 | 762.403  | 1002.299  | 522.507  | 0.521 | -0.940 | 0.001 | 0.011 |
| FBgn0036973 | 92.134   | 121.107   | 63.161   | 0.522 | -0.939 | 0.007 | 0.046 |
| FBgn0033039 | 307.660  | 404.262   | 211.059  | 0.522 | -0.938 | 0.001 | 0.009 |
| FBgn0036211 | 3418.085 | 4489.213  | 2346.956 | 0.523 | -0.936 | 0.000 | 0.006 |
| FBgn0033055 | 481.176  | 631.892   | 330.460  | 0.523 | -0.935 | 0.001 | 0.009 |
| FBgn0032016 | 130.859  | 171.820   | 89.898   | 0.523 | -0.935 | 0.006 | 0.040 |
| FBgn0032524 | 711.396  | 933.677   | 489.115  | 0.524 | -0.933 | 0.003 | 0.025 |
| FBgn0037526 | 210.841  | 276.694   | 144.989  | 0.524 | -0.932 | 0.002 | 0.019 |
| FBgn0263120 | 7844.836 | 10293.735 | 5395.937 | 0.524 | -0.932 | 0.000 | 0.004 |
| FBgn0032358 | 406.849  | 533.625   | 280.073  | 0.525 | -0.930 | 0.001 | 0.012 |
| FBgn0053202 | 1093.061 | 1433.559  | 752.563  | 0.525 | -0.930 | 0.000 | 0.005 |
| FBgn0030041 | 3699.970 | 4850.868  | 2549.072 | 0.525 | -0.928 | 0.000 | 0.004 |
| FBgn0052702 | 833.846  | 1093.213  | 574.479  | 0.525 | -0.928 | 0.000 | 0.006 |
| FBgn0032338 | 426.661  | 559.208   | 294.115  | 0.526 | -0.927 | 0.001 | 0.013 |
| FBgn0003862 | 3490.754 | 4574.978  | 2406.531 | 0.526 | -0.927 | 0.000 | 0.003 |
| FBgn0029512 | 297.386  | 389.710   | 205.063  | 0.526 | -0.926 | 0.001 | 0.012 |
| FBgn0037142 | 762.230  | 998.749   | 525.711  | 0.526 | -0.926 | 0.000 | 0.005 |
| FBgn0031182 | 263.231  | 344.831   | 181.630  | 0.527 | -0.925 | 0.002 | 0.020 |
| FBgn0026378 | 290.968  | 381.011   | 200.926  | 0.527 | -0.923 | 0.005 | 0.037 |
| FBgn0260049 | 994.442  | 1301.309  | 687.576  | 0.528 | -0.920 | 0.001 | 0.011 |
| FBgn0032752 | 793.407  | 1037.868  | 548.947  | 0.529 | -0.919 | 0.001 | 0.007 |
| FBgn0033846 | 564.392  | 738.072   | 390.712  | 0.529 | -0.918 | 0.001 | 0.008 |
| FBgn0039056 | 933.733  | 1221.009  | 646.458  | 0.529 | -0.917 | 0.000 | 0.005 |
| FBgn0259221 | 3936.418 | 5147.025  | 2725.811 | 0.530 | -0.917 | 0.000 | 0.004 |
| FBgn0029863 | 551.596  | 721.100   | 382.092  | 0.530 | -0.916 | 0.001 | 0.009 |

|             |           |           |           |       |        |       |       |
|-------------|-----------|-----------|-----------|-------|--------|-------|-------|
| FBgn0027505 | 496.044   | 648.266   | 343.822   | 0.530 | -0.915 | 0.001 | 0.011 |
| FBgn0086371 | 451.692   | 590.231   | 313.153   | 0.531 | -0.914 | 0.006 | 0.039 |
| FBgn0034439 | 150.660   | 196.862   | 104.458   | 0.531 | -0.914 | 0.006 | 0.040 |
| FBgn0000313 | 27976.236 | 36547.477 | 19404.996 | 0.531 | -0.913 | 0.000 | 0.003 |
| FBgn0037544 | 428.969   | 560.296   | 297.641   | 0.531 | -0.913 | 0.002 | 0.017 |
| FBgn0002914 | 1497.338  | 1954.861  | 1039.814  | 0.532 | -0.911 | 0.002 | 0.017 |
| FBgn0030733 | 5566.114  | 7264.239  | 3867.989  | 0.532 | -0.909 | 0.001 | 0.008 |
| FBgn0030863 | 1104.827  | 1441.226  | 768.428   | 0.533 | -0.907 | 0.000 | 0.005 |
| FBgn0030734 | 944.725   | 1232.334  | 657.116   | 0.533 | -0.907 | 0.001 | 0.012 |
| FBgn0052944 | 406.646   | 530.428   | 282.864   | 0.533 | -0.907 | 0.001 | 0.010 |
| FBgn0001990 | 197.105   | 257.007   | 137.203   | 0.534 | -0.906 | 0.003 | 0.023 |
| FBgn0010220 | 247.115   | 322.170   | 172.059   | 0.534 | -0.905 | 0.003 | 0.024 |
| FBgn0038767 | 114.106   | 148.724   | 79.487    | 0.534 | -0.904 | 0.006 | 0.043 |
| FBgn0050394 | 358.549   | 467.312   | 249.786   | 0.535 | -0.904 | 0.002 | 0.017 |
| FBgn0053113 | 9139.937  | 11908.455 | 6371.420  | 0.535 | -0.902 | 0.001 | 0.008 |
| FBgn0263046 | 184.074   | 239.688   | 128.459   | 0.536 | -0.900 | 0.007 | 0.046 |
| FBgn0039117 | 393.655   | 512.527   | 274.782   | 0.536 | -0.899 | 0.001 | 0.014 |
| FBgn0000497 | 691.593   | 899.464   | 483.721   | 0.538 | -0.895 | 0.001 | 0.009 |
| FBgn0027948 | 4121.436  | 5359.528  | 2883.344  | 0.538 | -0.894 | 0.000 | 0.004 |
| FBgn0263973 | 588.211   | 764.678   | 411.744   | 0.538 | -0.893 | 0.002 | 0.015 |
| FBgn0035916 | 219.331   | 285.060   | 153.603   | 0.539 | -0.892 | 0.006 | 0.040 |
| FBgn0032456 | 5091.058  | 6614.299  | 3567.818  | 0.539 | -0.891 | 0.002 | 0.022 |
| FBgn0033038 | 477.457   | 620.213   | 334.701   | 0.540 | -0.890 | 0.002 | 0.017 |
| FBgn0028530 | 200.598   | 260.473   | 140.722   | 0.540 | -0.888 | 0.007 | 0.044 |
| FBgn0031670 | 1494.398  | 1939.821  | 1048.976  | 0.541 | -0.887 | 0.001 | 0.012 |
| FBgn0262509 | 1005.075  | 1303.984  | 706.167   | 0.542 | -0.885 | 0.001 | 0.013 |
| FBgn0039942 | 189.186   | 245.442   | 132.929   | 0.542 | -0.885 | 0.004 | 0.030 |
| FBgn0036263 | 91.585    | 118.793   | 64.378    | 0.542 | -0.884 | 0.008 | 0.049 |
| FBgn0026737 | 173.321   | 224.789   | 121.852   | 0.542 | -0.883 | 0.003 | 0.027 |
| FBgn0025830 | 294.229   | 381.394   | 207.063   | 0.543 | -0.881 | 0.002 | 0.019 |
| FBgn0035023 | 1625.082  | 2105.578  | 1144.586  | 0.544 | -0.879 | 0.003 | 0.023 |
| FBgn0036760 | 760.198   | 984.810   | 535.585   | 0.544 | -0.879 | 0.001 | 0.012 |
| FBgn0030603 | 843.343   | 1092.205  | 594.481   | 0.544 | -0.878 | 0.008 | 0.050 |
| FBgn0035231 | 1448.668  | 1875.386  | 1021.951  | 0.545 | -0.876 | 0.001 | 0.007 |

|             |           |           |           |       |        |       |       |
|-------------|-----------|-----------|-----------|-------|--------|-------|-------|
| FBgn0034158 | 1142.299  | 1478.633  | 805.965   | 0.545 | -0.875 | 0.007 | 0.045 |
| FBgn0043362 | 3672.605  | 4753.524  | 2591.685  | 0.545 | -0.875 | 0.000 | 0.005 |
| FBgn0262167 | 400.721   | 518.615   | 282.827   | 0.545 | -0.875 | 0.001 | 0.014 |
| FBgn0031601 | 240.091   | 310.722   | 169.460   | 0.545 | -0.875 | 0.005 | 0.036 |
| FBgn0015039 | 2433.573  | 3149.294  | 1717.852  | 0.545 | -0.874 | 0.007 | 0.047 |
| FBgn0032671 | 133.016   | 172.126   | 93.906    | 0.546 | -0.874 | 0.008 | 0.049 |
| FBgn0032744 | 325.844   | 421.543   | 230.144   | 0.546 | -0.873 | 0.002 | 0.017 |
| FBgn0039620 | 1407.869  | 1820.689  | 995.050   | 0.547 | -0.872 | 0.001 | 0.009 |
| FBgn0052022 | 151.128   | 195.440   | 106.817   | 0.547 | -0.872 | 0.006 | 0.042 |
| FBgn0038662 | 2163.425  | 2797.168  | 1529.683  | 0.547 | -0.871 | 0.001 | 0.010 |
| FBgn0016715 | 476.443   | 615.942   | 336.944   | 0.547 | -0.870 | 0.007 | 0.046 |
| FBgn0027562 | 1033.300  | 1335.135  | 731.465   | 0.548 | -0.868 | 0.001 | 0.012 |
| FBgn0033205 | 128.939   | 166.560   | 91.318    | 0.548 | -0.867 | 0.005 | 0.034 |
| FBgn0039023 | 176.171   | 227.525   | 124.817   | 0.549 | -0.866 | 0.006 | 0.040 |
| FBgn0262742 | 29268.559 | 37795.227 | 20741.892 | 0.549 | -0.866 | 0.001 | 0.007 |
| FBgn0032156 | 4825.826  | 6231.534  | 3420.118  | 0.549 | -0.866 | 0.001 | 0.010 |
| FBgn0086451 | 308.832   | 398.719   | 218.944   | 0.549 | -0.865 | 0.002 | 0.022 |
| FBgn0030801 | 151.133   | 195.110   | 107.156   | 0.549 | -0.865 | 0.006 | 0.040 |
| FBgn0261671 | 5951.386  | 7678.202  | 4224.570  | 0.550 | -0.862 | 0.001 | 0.007 |
| FBgn0052647 | 2769.058  | 3571.122  | 1966.995  | 0.551 | -0.860 | 0.004 | 0.028 |
| FBgn0259978 | 911.258   | 1174.483  | 648.032   | 0.552 | -0.858 | 0.001 | 0.012 |
| FBgn0015279 | 837.767   | 1079.727  | 595.807   | 0.552 | -0.858 | 0.004 | 0.030 |
| FBgn0033088 | 249.257   | 321.232   | 177.283   | 0.552 | -0.858 | 0.003 | 0.024 |
| FBgn0031673 | 1218.880  | 1570.820  | 866.940   | 0.552 | -0.858 | 0.002 | 0.017 |
| FBgn0034180 | 2841.453  | 3661.464  | 2021.441  | 0.552 | -0.857 | 0.004 | 0.029 |
| FBgn0026376 | 1058.769  | 1364.257  | 753.281   | 0.552 | -0.857 | 0.001 | 0.009 |
| FBgn0036668 | 974.838   | 1256.032  | 693.645   | 0.552 | -0.857 | 0.001 | 0.013 |
| FBgn0038752 | 408.604   | 526.378   | 290.830   | 0.553 | -0.856 | 0.003 | 0.025 |
| FBgn0027490 | 172.147   | 221.639   | 122.655   | 0.553 | -0.854 | 0.004 | 0.032 |
| FBgn0036289 | 881.080   | 1134.350  | 627.810   | 0.553 | -0.853 | 0.002 | 0.015 |
| FBgn0039602 | 314.107   | 404.145   | 224.069   | 0.554 | -0.851 | 0.004 | 0.030 |
| FBgn0038890 | 1053.655  | 1355.610  | 751.700   | 0.555 | -0.851 | 0.001 | 0.011 |
| FBgn0043005 | 304.227   | 391.201   | 217.252   | 0.555 | -0.849 | 0.007 | 0.046 |
| FBgn0037846 | 260.509   | 334.863   | 186.156   | 0.556 | -0.847 | 0.003 | 0.022 |

|             |          |          |          |       |        |       |       |
|-------------|----------|----------|----------|-------|--------|-------|-------|
| FBgn0038593 | 335.572  | 431.032  | 240.111  | 0.557 | -0.844 | 0.002 | 0.021 |
| FBgn0033160 | 1144.526 | 1469.894 | 819.158  | 0.557 | -0.843 | 0.001 | 0.008 |
| FBgn0032614 | 291.178  | 373.939  | 208.416  | 0.557 | -0.843 | 0.005 | 0.034 |
| FBgn0037798 | 276.610  | 355.196  | 198.024  | 0.558 | -0.843 | 0.003 | 0.025 |
| FBgn0262517 | 703.478  | 903.282  | 503.673  | 0.558 | -0.843 | 0.003 | 0.023 |
| FBgn0034728 | 241.375  | 309.919  | 172.831  | 0.558 | -0.843 | 0.005 | 0.036 |
| FBgn0039183 | 289.985  | 372.282  | 207.687  | 0.558 | -0.842 | 0.003 | 0.028 |
| FBgn0023216 | 385.609  | 494.984  | 276.234  | 0.558 | -0.841 | 0.006 | 0.042 |
| FBgn0259896 | 309.832  | 397.689  | 221.976  | 0.558 | -0.841 | 0.004 | 0.028 |
| FBgn0015546 | 360.696  | 462.855  | 258.537  | 0.559 | -0.840 | 0.003 | 0.027 |
| FBgn0029167 | 2403.732 | 3083.229 | 1724.235 | 0.559 | -0.838 | 0.001 | 0.013 |
| FBgn0029828 | 914.128  | 1171.894 | 656.363  | 0.560 | -0.836 | 0.002 | 0.019 |
| FBgn0035411 | 809.577  | 1037.747 | 581.407  | 0.560 | -0.836 | 0.001 | 0.012 |
| FBgn0037120 | 1210.577 | 1551.294 | 869.860  | 0.561 | -0.835 | 0.001 | 0.013 |
| FBgn0086909 | 688.468  | 881.975  | 494.961  | 0.561 | -0.833 | 0.002 | 0.018 |
| FBgn0036191 | 352.236  | 451.222  | 253.251  | 0.561 | -0.833 | 0.003 | 0.024 |
| FBgn0037081 | 894.175  | 1145.127 | 643.222  | 0.562 | -0.832 | 0.002 | 0.016 |
| FBgn0035981 | 869.950  | 1113.790 | 626.111  | 0.562 | -0.831 | 0.002 | 0.016 |
| FBgn0022787 | 3000.051 | 3840.884 | 2159.218 | 0.562 | -0.831 | 0.001 | 0.008 |
| FBgn0044452 | 2308.599 | 2954.288 | 1662.911 | 0.563 | -0.829 | 0.001 | 0.010 |
| FBgn0036239 | 1771.684 | 2266.979 | 1276.390 | 0.563 | -0.829 | 0.001 | 0.011 |
| FBgn0036846 | 227.445  | 290.994  | 163.896  | 0.563 | -0.828 | 0.004 | 0.034 |
| FBgn0031842 | 2330.793 | 2981.649 | 1679.936 | 0.563 | -0.828 | 0.002 | 0.017 |
| FBgn0034964 | 728.105  | 931.358  | 524.853  | 0.564 | -0.827 | 0.002 | 0.017 |
| FBgn0026147 | 1201.583 | 1536.108 | 867.057  | 0.564 | -0.825 | 0.004 | 0.030 |
| FBgn0010014 | 1033.612 | 1321.346 | 745.877  | 0.564 | -0.825 | 0.002 | 0.016 |
| FBgn0050392 | 312.675  | 399.614  | 225.736  | 0.565 | -0.824 | 0.004 | 0.030 |
| FBgn0035110 | 356.016  | 454.903  | 257.128  | 0.565 | -0.823 | 0.005 | 0.035 |
| FBgn0013433 | 298.341  | 381.146  | 215.536  | 0.565 | -0.822 | 0.005 | 0.036 |
| FBgn0032633 | 996.906  | 1273.504 | 720.307  | 0.566 | -0.822 | 0.002 | 0.018 |
| FBgn0037074 | 2525.074 | 3225.641 | 1824.507 | 0.566 | -0.822 | 0.005 | 0.037 |
| FBgn0034660 | 898.799  | 1147.757 | 649.841  | 0.566 | -0.821 | 0.002 | 0.019 |
| FBgn0034958 | 1313.026 | 1676.713 | 949.338  | 0.566 | -0.821 | 0.002 | 0.016 |
| FBgn0027086 | 550.112  | 702.194  | 398.030  | 0.567 | -0.819 | 0.002 | 0.021 |

|             |           |           |           |       |        |       |       |
|-------------|-----------|-----------|-----------|-------|--------|-------|-------|
| FBgn0039726 | 337.582   | 430.841   | 244.322   | 0.567 | -0.818 | 0.004 | 0.031 |
| FBgn0037440 | 598.408   | 763.486   | 433.331   | 0.568 | -0.817 | 0.004 | 0.031 |
| FBgn0038035 | 199.266   | 254.217   | 144.316   | 0.568 | -0.817 | 0.006 | 0.042 |
| FBgn0025676 | 283.507   | 361.619   | 205.396   | 0.568 | -0.816 | 0.005 | 0.036 |
| FBgn0038349 | 1828.995  | 2332.655  | 1325.334  | 0.568 | -0.816 | 0.001 | 0.014 |
| FBgn0037019 | 228.617   | 291.468   | 165.767   | 0.569 | -0.814 | 0.004 | 0.031 |
| FBgn0036299 | 729.788   | 930.357   | 529.219   | 0.569 | -0.814 | 0.003 | 0.023 |
| FBgn0040322 | 710.337   | 905.089   | 515.584   | 0.570 | -0.812 | 0.002 | 0.016 |
| FBgn0040372 | 1064.936  | 1356.653  | 773.219   | 0.570 | -0.811 | 0.002 | 0.020 |
| FBgn0040323 | 334.979   | 426.606   | 243.353   | 0.570 | -0.810 | 0.003 | 0.027 |
| FBgn0046296 | 229.588   | 292.342   | 166.835   | 0.571 | -0.809 | 0.006 | 0.043 |
| FBgn0263199 | 2167.479  | 2759.651  | 1575.307  | 0.571 | -0.809 | 0.001 | 0.013 |
| FBgn0032938 | 1283.585  | 1633.827  | 933.344   | 0.571 | -0.808 | 0.005 | 0.035 |
| FBgn0001247 | 948.672   | 1207.504  | 689.841   | 0.571 | -0.808 | 0.002 | 0.018 |
| FBgn0034346 | 382.835   | 486.688   | 278.981   | 0.573 | -0.803 | 0.007 | 0.045 |
| FBgn0029899 | 2588.511  | 3290.677  | 1886.345  | 0.573 | -0.803 | 0.001 | 0.014 |
| FBgn0011232 | 751.848   | 955.194   | 548.502   | 0.574 | -0.800 | 0.004 | 0.033 |
| FBgn0036752 | 587.696   | 746.594   | 428.797   | 0.574 | -0.800 | 0.004 | 0.032 |
| FBgn0036262 | 6345.539  | 8060.142  | 4630.937  | 0.575 | -0.800 | 0.002 | 0.016 |
| FBgn0016081 | 7419.502  | 9414.318  | 5424.686  | 0.576 | -0.795 | 0.006 | 0.040 |
| FBgn0031573 | 175.843   | 223.116   | 128.570   | 0.576 | -0.795 | 0.007 | 0.049 |
| FBgn0030344 | 520.638   | 660.183   | 381.092   | 0.577 | -0.793 | 0.004 | 0.029 |
| FBgn0033434 | 671.221   | 850.804   | 491.639   | 0.578 | -0.791 | 0.005 | 0.035 |
| FBgn0036980 | 1785.782  | 2263.099  | 1308.464  | 0.578 | -0.790 | 0.001 | 0.015 |
| FBgn0015575 | 4051.854  | 5131.919  | 2971.790  | 0.579 | -0.788 | 0.002 | 0.018 |
| FBgn0015269 | 2407.056  | 3048.175  | 1765.937  | 0.579 | -0.788 | 0.002 | 0.018 |
| FBgn0036512 | 390.808   | 494.782   | 286.835   | 0.580 | -0.787 | 0.006 | 0.041 |
| FBgn0013984 | 1184.865  | 1499.567  | 870.162   | 0.580 | -0.785 | 0.002 | 0.019 |
| FBgn0032513 | 836.391   | 1058.441  | 614.342   | 0.580 | -0.785 | 0.002 | 0.020 |
| FBgn0032727 | 614.885   | 777.952   | 451.818   | 0.581 | -0.784 | 0.004 | 0.030 |
| FBgn0020503 | 5778.601  | 7309.811  | 4247.392  | 0.581 | -0.783 | 0.002 | 0.015 |
| FBgn0034572 | 566.517   | 716.498   | 416.536   | 0.581 | -0.783 | 0.003 | 0.026 |
| FBgn0086779 | 570.936   | 722.001   | 419.870   | 0.582 | -0.782 | 0.007 | 0.048 |
| FBgn0262109 | 68140.319 | 86131.056 | 50149.582 | 0.582 | -0.780 | 0.001 | 0.013 |



|             |           |           |          |       |        |       |       |
|-------------|-----------|-----------|----------|-------|--------|-------|-------|
| FBgn0053110 | 1022.051  | 1291.710  | 752.391  | 0.582 | -0.780 | 0.003 | 0.026 |
| FBgn0034543 | 590.719   | 746.175   | 435.264  | 0.583 | -0.778 | 0.007 | 0.048 |
| FBgn0034345 | 1741.843  | 2198.947  | 1284.739 | 0.584 | -0.775 | 0.003 | 0.024 |
| FBgn0031893 | 705.825   | 890.836   | 520.814  | 0.585 | -0.774 | 0.003 | 0.022 |
| FBgn0259680 | 1058.971  | 1336.124  | 781.819  | 0.585 | -0.773 | 0.005 | 0.035 |
| FBgn0033544 | 5122.775  | 6463.197  | 3782.354 | 0.585 | -0.773 | 0.003 | 0.027 |
| FBgn0015565 | 804.948   | 1015.368  | 594.528  | 0.586 | -0.772 | 0.003 | 0.026 |
| FBgn0085414 | 3727.203  | 4701.338  | 2753.068 | 0.586 | -0.772 | 0.002 | 0.021 |
| FBgn0037073 | 552.595   | 696.867   | 408.324  | 0.586 | -0.771 | 0.007 | 0.045 |
| FBgn0010741 | 547.564   | 688.971   | 406.157  | 0.590 | -0.762 | 0.008 | 0.049 |
| FBgn0040260 | 363.856   | 457.741   | 269.972  | 0.590 | -0.762 | 0.007 | 0.046 |
| FBgn0263133 | 561.822   | 706.484   | 417.160  | 0.590 | -0.760 | 0.006 | 0.042 |
| FBgn0027547 | 2313.720  | 2909.292  | 1718.148 | 0.591 | -0.760 | 0.004 | 0.029 |
| FBgn0033902 | 1742.901  | 2190.513  | 1295.289 | 0.591 | -0.758 | 0.005 | 0.037 |
| FBgn0033889 | 915.554   | 1150.053  | 681.055  | 0.592 | -0.756 | 0.004 | 0.033 |
| FBgn0032899 | 1244.178  | 1561.544  | 926.813  | 0.594 | -0.753 | 0.004 | 0.032 |
| FBgn0011589 | 1202.895  | 1509.708  | 896.083  | 0.594 | -0.753 | 0.007 | 0.045 |
| FBgn0263599 | 1042.609  | 1308.319  | 776.900  | 0.594 | -0.752 | 0.004 | 0.030 |
| FBgn0051414 | 627.960   | 787.858   | 468.063  | 0.594 | -0.751 | 0.004 | 0.028 |
| FBgn0036053 | 1682.785  | 2108.653  | 1256.917 | 0.596 | -0.746 | 0.003 | 0.026 |
| FBgn0037897 | 921.011   | 1153.946  | 688.076  | 0.596 | -0.746 | 0.005 | 0.034 |
| FBgn0041604 | 1000.159  | 1252.714  | 747.605  | 0.597 | -0.745 | 0.006 | 0.042 |
| FBgn0051195 | 1183.041  | 1480.532  | 885.550  | 0.598 | -0.741 | 0.005 | 0.036 |
| FBgn0015509 | 2990.690  | 3741.849  | 2239.532 | 0.599 | -0.741 | 0.003 | 0.023 |
| FBgn0035111 | 614.421   | 768.707   | 460.134  | 0.599 | -0.740 | 0.006 | 0.041 |
| FBgn0039321 | 4042.117  | 5055.172  | 3029.062 | 0.599 | -0.739 | 0.004 | 0.028 |
| FBgn0031914 | 1424.162  | 1780.299  | 1068.024 | 0.600 | -0.737 | 0.006 | 0.040 |
| FBgn0020497 | 1653.419  | 2066.760  | 1240.079 | 0.600 | -0.737 | 0.007 | 0.044 |
| FBgn0034184 | 3028.987  | 3780.739  | 2277.234 | 0.602 | -0.731 | 0.006 | 0.040 |
| FBgn0037138 | 10482.274 | 13080.464 | 7884.084 | 0.603 | -0.730 | 0.005 | 0.038 |
| FBgn0040273 | 1017.732  | 1268.784  | 766.680  | 0.604 | -0.727 | 0.004 | 0.030 |
| FBgn0022153 | 1218.562  | 1518.657  | 918.466  | 0.605 | -0.725 | 0.003 | 0.026 |
| FBgn0051344 | 1003.876  | 1250.433  | 757.319  | 0.606 | -0.723 | 0.005 | 0.039 |
| FBgn0033225 | 574.773   | 715.895   | 433.651  | 0.606 | -0.723 | 0.007 | 0.046 |

|             |           |           |           |       |        |       |       |
|-------------|-----------|-----------|-----------|-------|--------|-------|-------|
| FBgn0032222 | 1063.874  | 1324.951  | 802.796   | 0.606 | -0.723 | 0.007 | 0.048 |
| FBgn0259682 | 5676.746  | 7069.604  | 4283.887  | 0.606 | -0.723 | 0.004 | 0.029 |
| FBgn0005410 | 2782.031  | 3464.089  | 2099.973  | 0.606 | -0.722 | 0.003 | 0.026 |
| FBgn0037347 | 561.986   | 699.731   | 424.241   | 0.606 | -0.722 | 0.005 | 0.037 |
| FBgn0039081 | 2333.658  | 2905.574  | 1761.741  | 0.606 | -0.722 | 0.005 | 0.038 |
| FBgn0039466 | 1720.657  | 2140.015  | 1301.299  | 0.608 | -0.718 | 0.004 | 0.029 |
| FBgn0032167 | 558.697   | 694.634   | 422.759   | 0.609 | -0.716 | 0.006 | 0.040 |
| FBgn0016123 | 1646.888  | 2047.252  | 1246.525  | 0.609 | -0.716 | 0.007 | 0.047 |
| FBgn0032879 | 1452.003  | 1804.539  | 1099.467  | 0.609 | -0.715 | 0.007 | 0.045 |
| FBgn0263601 | 1203.109  | 1490.739  | 915.479   | 0.614 | -0.703 | 0.005 | 0.038 |
| FBgn0260942 | 1177.101  | 1454.006  | 900.196   | 0.619 | -0.692 | 0.006 | 0.044 |
| FBgn0052311 | 7501.335  | 9259.969  | 5742.702  | 0.620 | -0.689 | 0.005 | 0.037 |
| FBgn0000283 | 1918.496  | 2362.816  | 1474.175  | 0.624 | -0.681 | 0.006 | 0.044 |
| FBgn0005632 | 7277.980  | 8951.002  | 5604.959  | 0.626 | -0.675 | 0.006 | 0.041 |
| FBgn0001208 | 6406.709  | 7839.602  | 4973.815  | 0.634 | -0.656 | 0.006 | 0.041 |
| FBgn0010213 | 3848.844  | 3052.843  | 4644.846  | 1.521 | 0.605  | 0.007 | 0.044 |
| FBgn0000259 | 2743.792  | 2170.287  | 3317.297  | 1.529 | 0.612  | 0.008 | 0.049 |
| FBgn0037270 | 5877.202  | 4610.493  | 7143.911  | 1.549 | 0.632  | 0.004 | 0.029 |
| FBgn0030079 | 2173.846  | 1704.045  | 2643.647  | 1.551 | 0.634  | 0.006 | 0.042 |
| FBgn0086355 | 10353.527 | 8102.611  | 12604.442 | 1.556 | 0.637  | 0.007 | 0.047 |
| FBgn0031883 | 5925.796  | 4636.052  | 7215.539  | 1.556 | 0.638  | 0.007 | 0.047 |
| FBgn0001257 | 1908.269  | 1492.309  | 2324.230  | 1.557 | 0.639  | 0.007 | 0.044 |
| FBgn0024183 | 5106.722  | 3979.872  | 6233.572  | 1.566 | 0.647  | 0.008 | 0.049 |
| FBgn0038515 | 1116.699  | 869.587   | 1363.811  | 1.568 | 0.649  | 0.008 | 0.049 |
| FBgn0039561 | 2352.802  | 1831.777  | 2873.827  | 1.569 | 0.650  | 0.006 | 0.041 |
| FBgn0027057 | 2084.858  | 1618.843  | 2550.873  | 1.576 | 0.656  | 0.006 | 0.040 |
| FBgn0261642 | 6812.313  | 5289.225  | 8335.401  | 1.576 | 0.656  | 0.005 | 0.038 |
| FBgn0037892 | 683.099   | 529.207   | 836.991   | 1.582 | 0.661  | 0.005 | 0.038 |
| FBgn0036488 | 968.153   | 749.868   | 1186.437  | 1.582 | 0.662  | 0.005 | 0.035 |
| FBgn0051549 | 692.712   | 536.338   | 849.086   | 1.583 | 0.663  | 0.006 | 0.040 |
| FBgn0032059 | 732.973   | 567.250   | 898.695   | 1.584 | 0.664  | 0.006 | 0.044 |
| FBgn0003941 | 49557.922 | 38191.999 | 60923.844 | 1.595 | 0.674  | 0.003 | 0.022 |
| FBgn0000567 | 1568.287  | 1208.604  | 1927.971  | 1.595 | 0.674  | 0.004 | 0.032 |
| FBgn0003386 | 3256.176  | 2503.917  | 4008.435  | 1.601 | 0.679  | 0.006 | 0.040 |

|             |            |            |             |       |       |       |       |
|-------------|------------|------------|-------------|-------|-------|-------|-------|
| FBgn0039481 | 1730.349   | 1330.028   | 2130.671    | 1.602 | 0.680 | 0.006 | 0.041 |
| FBgn0030328 | 7262.642   | 5581.267   | 8944.017    | 1.603 | 0.680 | 0.003 | 0.024 |
| FBgn0002940 | 952097.829 | 730793.405 | 1173402.252 | 1.606 | 0.683 | 0.005 | 0.038 |
| FBgn0023167 | 894.966    | 686.750    | 1103.182    | 1.606 | 0.684 | 0.006 | 0.043 |
| FBgn0032651 | 563.194    | 432.010    | 694.378     | 1.607 | 0.685 | 0.007 | 0.047 |
| FBgn0026089 | 1112.411   | 852.224    | 1372.597    | 1.611 | 0.688 | 0.006 | 0.040 |
| FBgn0011766 | 2735.328   | 2095.139   | 3375.516    | 1.611 | 0.688 | 0.004 | 0.032 |
| FBgn0029937 | 999.670    | 765.166    | 1234.174    | 1.613 | 0.690 | 0.005 | 0.038 |
| FBgn0031818 | 1845.674   | 1412.698   | 2278.651    | 1.613 | 0.690 | 0.006 | 0.041 |
| FBgn0028703 | 6495.516   | 4971.325   | 8019.708    | 1.613 | 0.690 | 0.006 | 0.044 |
| FBgn0032420 | 731.956    | 560.074    | 903.837     | 1.614 | 0.690 | 0.004 | 0.033 |
| FBgn0030838 | 1964.756   | 1503.166   | 2426.346    | 1.614 | 0.691 | 0.003 | 0.026 |
| FBgn0040375 | 1007.799   | 770.179    | 1245.419    | 1.617 | 0.693 | 0.008 | 0.049 |
| FBgn0038774 | 2364.179   | 1805.146   | 2923.212    | 1.619 | 0.695 | 0.003 | 0.028 |
| FBgn0037102 | 1080.497   | 824.726    | 1336.267    | 1.620 | 0.696 | 0.005 | 0.037 |
| FBgn0031836 | 6014.229   | 4590.232   | 7438.226    | 1.620 | 0.696 | 0.002 | 0.021 |
| FBgn0030593 | 15598.272  | 11903.017  | 19293.528   | 1.621 | 0.697 | 0.005 | 0.037 |
| FBgn0036152 | 1477.455   | 1127.414   | 1827.497    | 1.621 | 0.697 | 0.002 | 0.021 |
| FBgn0022160 | 9495.287   | 7243.932   | 11746.643   | 1.622 | 0.697 | 0.006 | 0.042 |
| FBgn0005694 | 1697.496   | 1294.592   | 2100.400    | 1.622 | 0.698 | 0.005 | 0.036 |
| FBgn0031106 | 822.515    | 627.058    | 1017.971    | 1.623 | 0.699 | 0.006 | 0.042 |
| FBgn0036489 | 340.678    | 259.350    | 422.005     | 1.627 | 0.702 | 0.004 | 0.034 |
| FBgn0004362 | 1402.256   | 1067.074   | 1737.437    | 1.628 | 0.703 | 0.004 | 0.032 |
| FBgn0031011 | 1431.652   | 1089.356   | 1773.948    | 1.628 | 0.703 | 0.004 | 0.029 |
| FBgn0036111 | 3792.043   | 2882.974   | 4701.112    | 1.631 | 0.705 | 0.005 | 0.039 |
| FBgn0037130 | 1187.437   | 902.752    | 1472.122    | 1.631 | 0.705 | 0.008 | 0.049 |
| FBgn0033919 | 4268.953   | 3244.621   | 5293.285    | 1.631 | 0.706 | 0.006 | 0.043 |
| FBgn0030974 | 2931.276   | 2225.986   | 3636.565    | 1.634 | 0.708 | 0.005 | 0.037 |
| FBgn0030114 | 1161.145   | 881.153    | 1441.137    | 1.636 | 0.710 | 0.007 | 0.045 |
| FBgn0020496 | 4003.883   | 3038.088   | 4969.678    | 1.636 | 0.710 | 0.003 | 0.023 |
| FBgn0039102 | 3915.162   | 2970.709   | 4859.616    | 1.636 | 0.710 | 0.005 | 0.035 |
| FBgn0019947 | 1020.695   | 774.453    | 1266.938    | 1.636 | 0.710 | 0.007 | 0.049 |
| FBgn0035639 | 1028.915   | 780.679    | 1277.150    | 1.636 | 0.710 | 0.006 | 0.044 |
| FBgn0038948 | 620.816    | 470.743    | 770.890     | 1.638 | 0.712 | 0.004 | 0.029 |

|             |           |           |           |       |       |       |       |
|-------------|-----------|-----------|-----------|-------|-------|-------|-------|
| FBgn0062440 | 2342.803  | 1776.160  | 2909.446  | 1.638 | 0.712 | 0.002 | 0.015 |
| FBgn0004855 | 789.906   | 598.655   | 981.158   | 1.639 | 0.713 | 0.006 | 0.044 |
| FBgn0028991 | 2604.365  | 1973.156  | 3235.573  | 1.640 | 0.714 | 0.006 | 0.042 |
| FBgn0001114 | 23495.241 | 17797.349 | 29193.132 | 1.640 | 0.714 | 0.003 | 0.027 |
| FBgn0011205 | 1266.733  | 959.486   | 1573.979  | 1.640 | 0.714 | 0.004 | 0.031 |
| FBgn0083961 | 1212.565  | 918.356   | 1506.775  | 1.641 | 0.714 | 0.003 | 0.028 |
| FBgn0017566 | 14147.906 | 10712.520 | 17583.293 | 1.641 | 0.715 | 0.004 | 0.029 |
| FBgn0039966 | 994.850   | 752.509   | 1237.191  | 1.644 | 0.717 | 0.004 | 0.029 |
| FBgn0030329 | 2987.088  | 2258.600  | 3715.575  | 1.645 | 0.718 | 0.003 | 0.027 |
| FBgn0020910 | 33077.702 | 25010.119 | 41145.285 | 1.645 | 0.718 | 0.008 | 0.050 |
| FBgn0014869 | 10183.452 | 7694.888  | 12672.017 | 1.647 | 0.720 | 0.003 | 0.025 |
| FBgn0031791 | 422.966   | 319.488   | 526.445   | 1.648 | 0.721 | 0.007 | 0.045 |
| FBgn0040877 | 590.509   | 446.022   | 734.997   | 1.648 | 0.721 | 0.006 | 0.043 |
| FBgn0263993 | 4776.250  | 3605.833  | 5946.666  | 1.649 | 0.722 | 0.006 | 0.039 |
| FBgn0028420 | 2862.009  | 2158.085  | 3565.934  | 1.652 | 0.725 | 0.004 | 0.033 |
| FBgn0029504 | 4994.833  | 3765.867  | 6223.799  | 1.653 | 0.725 | 0.004 | 0.028 |
| FBgn0040340 | 2279.263  | 1718.125  | 2840.400  | 1.653 | 0.725 | 0.002 | 0.021 |
| FBgn0038771 | 1649.669  | 1243.124  | 2056.214  | 1.654 | 0.726 | 0.001 | 0.014 |
| FBgn0039494 | 1142.192  | 860.684   | 1423.699  | 1.654 | 0.726 | 0.007 | 0.046 |
| FBgn0033812 | 1967.729  | 1482.617  | 2452.841  | 1.654 | 0.726 | 0.007 | 0.044 |
| FBgn0037930 | 1040.803  | 783.974   | 1297.632  | 1.655 | 0.727 | 0.002 | 0.019 |
| FBgn0039186 | 1583.036  | 1192.229  | 1973.842  | 1.656 | 0.727 | 0.007 | 0.044 |
| FBgn0015321 | 1389.105  | 1045.989  | 1732.221  | 1.656 | 0.728 | 0.003 | 0.025 |
| FBgn0025335 | 918.575   | 691.282   | 1145.868  | 1.658 | 0.729 | 0.003 | 0.024 |
| FBgn0039451 | 2321.844  | 1747.083  | 2896.605  | 1.658 | 0.729 | 0.007 | 0.044 |
| FBgn0262114 | 6086.146  | 4577.548  | 7594.743  | 1.659 | 0.730 | 0.004 | 0.031 |
| FBgn0000286 | 2272.819  | 1709.298  | 2836.339  | 1.659 | 0.731 | 0.003 | 0.027 |
| FBgn0039767 | 1326.502  | 997.220   | 1655.783  | 1.660 | 0.732 | 0.005 | 0.034 |
| FBgn0034611 | 1314.207  | 987.772   | 1640.641  | 1.661 | 0.732 | 0.005 | 0.034 |
| FBgn0030584 | 2273.897  | 1708.638  | 2839.156  | 1.662 | 0.733 | 0.006 | 0.042 |
| FBgn0003475 | 6410.949  | 4816.932  | 8004.967  | 1.662 | 0.733 | 0.006 | 0.043 |
| FBgn0024362 | 1514.382  | 1137.700  | 1891.064  | 1.662 | 0.733 | 0.004 | 0.033 |
| FBgn0085410 | 585.027   | 439.418   | 730.636   | 1.663 | 0.734 | 0.007 | 0.047 |
| FBgn0031896 | 1243.299  | 933.581   | 1553.017  | 1.664 | 0.734 | 0.004 | 0.031 |

|             |           |           |           |       |       |       |       |
|-------------|-----------|-----------|-----------|-------|-------|-------|-------|
| FBgn0027493 | 4326.522  | 3248.569  | 5404.476  | 1.664 | 0.734 | 0.004 | 0.030 |
| FBgn0025638 | 1730.394  | 1298.929  | 2161.860  | 1.664 | 0.735 | 0.002 | 0.019 |
| FBgn0033814 | 2322.129  | 1741.958  | 2902.301  | 1.666 | 0.736 | 0.005 | 0.038 |
| FBgn0024983 | 581.452   | 436.096   | 726.808   | 1.667 | 0.737 | 0.003 | 0.027 |
| FBgn0033403 | 3120.234  | 2339.583  | 3900.886  | 1.667 | 0.738 | 0.004 | 0.030 |
| FBgn0041775 | 5342.180  | 4005.398  | 6678.961  | 1.667 | 0.738 | 0.003 | 0.025 |
| FBgn0030011 | 2862.762  | 2146.068  | 3579.457  | 1.668 | 0.738 | 0.003 | 0.022 |
| FBgn0024556 | 2927.205  | 2194.245  | 3660.166  | 1.668 | 0.738 | 0.004 | 0.029 |
| FBgn0011236 | 821.378   | 615.518   | 1027.239  | 1.669 | 0.739 | 0.005 | 0.035 |
| FBgn0038546 | 1083.332  | 811.762   | 1354.903  | 1.669 | 0.739 | 0.002 | 0.018 |
| FBgn0028862 | 1376.378  | 1031.344  | 1721.413  | 1.669 | 0.739 | 0.005 | 0.036 |
| FBgn0029148 | 776.857   | 582.082   | 971.633   | 1.669 | 0.739 | 0.004 | 0.030 |
| FBgn0030269 | 588.486   | 440.927   | 736.045   | 1.669 | 0.739 | 0.002 | 0.021 |
| FBgn0051855 | 469.470   | 351.632   | 587.309   | 1.670 | 0.740 | 0.007 | 0.044 |
| FBgn0040529 | 9413.537  | 7050.233  | 11776.841 | 1.670 | 0.740 | 0.002 | 0.021 |
| FBgn0052772 | 1096.394  | 821.043   | 1371.746  | 1.671 | 0.740 | 0.005 | 0.038 |
| FBgn0025373 | 474.436   | 355.252   | 593.620   | 1.671 | 0.741 | 0.006 | 0.042 |
| FBgn0014184 | 46350.328 | 34692.816 | 58007.840 | 1.672 | 0.742 | 0.003 | 0.024 |
| FBgn0030894 | 462.516   | 346.188   | 578.843   | 1.672 | 0.742 | 0.006 | 0.042 |
| FBgn0030658 | 698.767   | 522.953   | 874.582   | 1.672 | 0.742 | 0.003 | 0.026 |
| FBgn0000045 | 2406.265  | 1800.698  | 3011.833  | 1.673 | 0.742 | 0.003 | 0.024 |
| FBgn0052675 | 2724.909  | 2038.617  | 3411.200  | 1.673 | 0.743 | 0.002 | 0.018 |
| FBgn0030403 | 2131.837  | 1594.612  | 2669.061  | 1.674 | 0.743 | 0.006 | 0.039 |
| FBgn0014868 | 1583.679  | 1184.046  | 1983.311  | 1.675 | 0.744 | 0.002 | 0.018 |
| FBgn0041585 | 1346.446  | 1006.538  | 1686.353  | 1.675 | 0.745 | 0.003 | 0.024 |
| FBgn0250746 | 2042.763  | 1526.817  | 2558.709  | 1.676 | 0.745 | 0.002 | 0.019 |
| FBgn0035473 | 1878.755  | 1404.202  | 2353.308  | 1.676 | 0.745 | 0.006 | 0.040 |
| FBgn0015320 | 848.044   | 633.678   | 1062.410  | 1.677 | 0.746 | 0.002 | 0.018 |
| FBgn0024285 | 1766.269  | 1319.486  | 2213.051  | 1.677 | 0.746 | 0.004 | 0.032 |
| FBgn0034118 | 642.949   | 480.294   | 805.604   | 1.677 | 0.746 | 0.004 | 0.030 |
| FBgn0259938 | 1486.122  | 1109.937  | 1862.308  | 1.678 | 0.747 | 0.004 | 0.032 |
| FBgn0036106 | 9799.433  | 7314.881  | 12283.986 | 1.679 | 0.748 | 0.002 | 0.018 |
| FBgn0013720 | 912.586   | 681.071   | 1144.102  | 1.680 | 0.748 | 0.002 | 0.019 |
| FBgn0024360 | 397.852   | 296.910   | 498.794   | 1.680 | 0.748 | 0.008 | 0.050 |

|             |           |           |           |       |       |       |       |
|-------------|-----------|-----------|-----------|-------|-------|-------|-------|
| FBgn0263072 | 5484.712  | 4092.244  | 6877.179  | 1.681 | 0.749 | 0.002 | 0.021 |
| FBgn0027791 | 394.389   | 294.177   | 494.602   | 1.681 | 0.750 | 0.003 | 0.024 |
| FBgn0263995 | 9990.381  | 7449.961  | 12530.800 | 1.682 | 0.750 | 0.003 | 0.027 |
| FBgn0033083 | 508.940   | 379.467   | 638.412   | 1.682 | 0.751 | 0.006 | 0.043 |
| FBgn0020510 | 1012.546  | 754.240   | 1270.851  | 1.685 | 0.753 | 0.006 | 0.043 |
| FBgn0029715 | 1142.637  | 850.918   | 1434.357  | 1.686 | 0.753 | 0.002 | 0.021 |
| FBgn0041210 | 4055.562  | 3019.442  | 5091.681  | 1.686 | 0.754 | 0.004 | 0.032 |
| FBgn0039492 | 2855.363  | 2125.860  | 3584.866  | 1.686 | 0.754 | 0.005 | 0.036 |
| FBgn0038787 | 1615.688  | 1202.843  | 2028.534  | 1.686 | 0.754 | 0.003 | 0.026 |
| FBgn0261619 | 32802.482 | 24419.783 | 41185.181 | 1.687 | 0.754 | 0.002 | 0.022 |
| FBgn0038876 | 896.145   | 667.058   | 1125.232  | 1.687 | 0.754 | 0.005 | 0.036 |
| FBgn0013770 | 22583.259 | 16809.917 | 28356.601 | 1.687 | 0.754 | 0.003 | 0.023 |
| FBgn0001168 | 953.669   | 709.795   | 1197.544  | 1.687 | 0.755 | 0.002 | 0.019 |
| FBgn0038586 | 332.369   | 247.357   | 417.380   | 1.687 | 0.755 | 0.006 | 0.041 |
| FBgn0263773 | 4608.795  | 3428.552  | 5789.039  | 1.688 | 0.756 | 0.002 | 0.020 |
| FBgn0062442 | 3667.344  | 2727.762  | 4606.926  | 1.689 | 0.756 | 0.006 | 0.042 |
| FBgn0031534 | 1415.718  | 1052.951  | 1778.485  | 1.689 | 0.756 | 0.007 | 0.048 |
| FBgn0005771 | 1888.164  | 1404.254  | 2372.075  | 1.689 | 0.756 | 0.003 | 0.026 |
| FBgn0039019 | 529.301   | 393.634   | 664.968   | 1.689 | 0.756 | 0.002 | 0.021 |
| FBgn0031664 | 428.487   | 318.563   | 538.412   | 1.690 | 0.757 | 0.004 | 0.032 |
| FBgn0085188 | 1265.243  | 939.782   | 1590.703  | 1.693 | 0.759 | 0.002 | 0.018 |
| FBgn0034645 | 6200.765  | 4605.339  | 7796.191  | 1.693 | 0.759 | 0.001 | 0.013 |
| FBgn0016685 | 2146.360  | 1594.052  | 2698.667  | 1.693 | 0.760 | 0.002 | 0.015 |
| FBgn0037299 | 1092.171  | 810.987   | 1373.355  | 1.693 | 0.760 | 0.003 | 0.027 |
| FBgn0031971 | 5910.578  | 4387.732  | 7433.424  | 1.694 | 0.761 | 0.001 | 0.010 |
| FBgn0011701 | 1834.797  | 1362.063  | 2307.531  | 1.694 | 0.761 | 0.006 | 0.039 |
| FBgn0030266 | 4397.538  | 3264.307  | 5530.769  | 1.694 | 0.761 | 0.005 | 0.038 |
| FBgn0066114 | 824.812   | 612.196   | 1037.428  | 1.695 | 0.761 | 0.003 | 0.025 |
| FBgn0004926 | 2150.959  | 1595.371  | 2706.546  | 1.696 | 0.763 | 0.004 | 0.031 |
| FBgn0051057 | 3805.347  | 2822.023  | 4788.671  | 1.697 | 0.763 | 0.004 | 0.031 |
| FBgn0033886 | 2245.240  | 1664.206  | 2826.274  | 1.698 | 0.764 | 0.003 | 0.022 |
| FBgn0036643 | 1025.515  | 760.019   | 1291.010  | 1.699 | 0.764 | 0.004 | 0.029 |
| FBgn0039509 | 1297.947  | 961.452   | 1634.442  | 1.700 | 0.766 | 0.002 | 0.020 |
| FBgn0027621 | 11711.359 | 8673.867  | 14748.851 | 1.700 | 0.766 | 0.002 | 0.020 |

|             |           |           |           |       |       |       |       |
|-------------|-----------|-----------|-----------|-------|-------|-------|-------|
| FBgn0034138 | 32226.037 | 23860.175 | 40591.899 | 1.701 | 0.767 | 0.002 | 0.016 |
| FBgn0030966 | 764.768   | 566.117   | 963.418   | 1.702 | 0.767 | 0.002 | 0.019 |
| FBgn0035589 | 998.106   | 738.705   | 1257.508  | 1.702 | 0.767 | 0.002 | 0.015 |
| FBgn0030552 | 531.706   | 393.070   | 670.341   | 1.705 | 0.770 | 0.004 | 0.029 |
| FBgn0024234 | 1004.671  | 742.517   | 1266.825  | 1.706 | 0.771 | 0.003 | 0.026 |
| FBgn0259172 | 607.841   | 449.184   | 766.499   | 1.706 | 0.771 | 0.007 | 0.046 |
| FBgn0030243 | 2251.541  | 1663.656  | 2839.425  | 1.707 | 0.771 | 0.003 | 0.025 |
| FBgn0033079 | 1252.695  | 925.399   | 1579.991  | 1.707 | 0.772 | 0.004 | 0.028 |
| FBgn0021875 | 469.570   | 346.854   | 592.286   | 1.708 | 0.772 | 0.003 | 0.026 |
| FBgn0036514 | 178.279   | 131.667   | 224.890   | 1.708 | 0.772 | 0.008 | 0.049 |
| FBgn0030350 | 1708.096  | 1261.488  | 2154.704  | 1.708 | 0.772 | 0.002 | 0.015 |
| FBgn0039743 | 1640.927  | 1211.380  | 2070.474  | 1.709 | 0.773 | 0.008 | 0.050 |
| FBgn0033529 | 1726.370  | 1274.216  | 2178.525  | 1.710 | 0.774 | 0.001 | 0.010 |
| FBgn0033235 | 1188.709  | 877.016   | 1500.402  | 1.711 | 0.775 | 0.003 | 0.024 |
| FBgn0027560 | 29259.922 | 21581.914 | 36937.929 | 1.712 | 0.775 | 0.002 | 0.021 |
| FBgn0031713 | 1425.040  | 1050.893  | 1799.188  | 1.712 | 0.776 | 0.002 | 0.017 |
| FBgn0010441 | 528.552   | 389.770   | 667.333   | 1.712 | 0.776 | 0.007 | 0.045 |
| FBgn0040346 | 627.908   | 462.691   | 793.124   | 1.714 | 0.777 | 0.004 | 0.030 |
| FBgn0011818 | 1293.052  | 952.769   | 1633.334  | 1.714 | 0.778 | 0.002 | 0.015 |
| FBgn0000221 | 138.915   | 102.314   | 175.516   | 1.715 | 0.779 | 0.006 | 0.040 |
| FBgn0033342 | 2097.577  | 1544.716  | 2650.437  | 1.716 | 0.779 | 0.002 | 0.019 |
| FBgn0026409 | 25951.194 | 19105.088 | 32797.300 | 1.717 | 0.780 | 0.001 | 0.013 |
| FBgn0003044 | 1225.959  | 902.514   | 1549.404  | 1.717 | 0.780 | 0.004 | 0.029 |
| FBgn0030306 | 1838.463  | 1353.020  | 2323.906  | 1.718 | 0.780 | 0.002 | 0.020 |
| FBgn0037135 | 7978.873  | 5872.058  | 10085.689 | 1.718 | 0.780 | 0.003 | 0.023 |
| FBgn0040235 | 680.410   | 500.453   | 860.367   | 1.719 | 0.782 | 0.001 | 0.013 |
| FBgn0052638 | 1354.983  | 996.320   | 1713.645  | 1.720 | 0.782 | 0.002 | 0.015 |
| FBgn0026872 | 1012.092  | 744.086   | 1280.097  | 1.720 | 0.783 | 0.003 | 0.024 |
| FBgn0015766 | 35782.807 | 26288.973 | 45276.642 | 1.722 | 0.784 | 0.003 | 0.024 |
| FBgn0039136 | 1797.541  | 1319.590  | 2275.492  | 1.724 | 0.786 | 0.002 | 0.016 |
| FBgn0023211 | 1950.676  | 1431.271  | 2470.080  | 1.726 | 0.787 | 0.003 | 0.025 |
| FBgn0262567 | 246.726   | 180.931   | 312.522   | 1.727 | 0.789 | 0.003 | 0.023 |
| FBgn0261572 | 378.515   | 277.550   | 479.480   | 1.728 | 0.789 | 0.004 | 0.032 |
| FBgn0032656 | 1115.909  | 818.177   | 1413.641  | 1.728 | 0.789 | 0.002 | 0.018 |

|             |           |           |           |       |       |       |       |
|-------------|-----------|-----------|-----------|-------|-------|-------|-------|
| FBgn0033166 | 2851.165  | 2090.329  | 3612.001  | 1.728 | 0.789 | 0.002 | 0.015 |
| FBgn0035294 | 640.584   | 469.537   | 811.631   | 1.729 | 0.790 | 0.004 | 0.033 |
| FBgn0038113 | 374.638   | 274.593   | 474.683   | 1.729 | 0.790 | 0.007 | 0.045 |
| FBgn0031051 | 1200.808  | 880.132   | 1521.484  | 1.729 | 0.790 | 0.002 | 0.020 |
| FBgn0011640 | 2483.417  | 1820.204  | 3146.629  | 1.729 | 0.790 | 0.001 | 0.010 |
| FBgn0002930 | 5940.163  | 4352.185  | 7528.140  | 1.730 | 0.791 | 0.001 | 0.010 |
| FBgn0003963 | 671.768   | 492.160   | 851.376   | 1.730 | 0.791 | 0.006 | 0.044 |
| FBgn0261444 | 6192.614  | 4535.482  | 7849.747  | 1.731 | 0.791 | 0.002 | 0.016 |
| FBgn0051075 | 890.535   | 652.051   | 1129.018  | 1.731 | 0.792 | 0.006 | 0.040 |
| FBgn0020545 | 2241.819  | 1641.335  | 2842.302  | 1.732 | 0.792 | 0.006 | 0.042 |
| FBgn0031080 | 157.319   | 115.169   | 199.469   | 1.732 | 0.792 | 0.006 | 0.042 |
| FBgn0039562 | 4884.531  | 3574.848  | 6194.214  | 1.733 | 0.793 | 0.003 | 0.024 |
| FBgn0020389 | 1439.302  | 1052.615  | 1825.988  | 1.735 | 0.795 | 0.006 | 0.039 |
| FBgn0024364 | 375.785   | 274.818   | 476.751   | 1.735 | 0.795 | 0.005 | 0.035 |
| FBgn0003997 | 496.315   | 362.876   | 629.753   | 1.735 | 0.795 | 0.003 | 0.024 |
| FBgn0261461 | 3265.815  | 2386.920  | 4144.710  | 1.736 | 0.796 | 0.001 | 0.014 |
| FBgn0039977 | 273.050   | 199.542   | 346.557   | 1.737 | 0.796 | 0.007 | 0.045 |
| FBgn0030052 | 1923.072  | 1405.300  | 2440.843  | 1.737 | 0.797 | 0.005 | 0.037 |
| FBgn0041188 | 6493.494  | 4743.798  | 8243.191  | 1.738 | 0.797 | 0.004 | 0.029 |
| FBgn0028543 | 5959.652  | 4353.676  | 7565.629  | 1.738 | 0.797 | 0.001 | 0.012 |
| FBgn0001123 | 1521.096  | 1111.088  | 1931.103  | 1.738 | 0.797 | 0.001 | 0.013 |
| FBgn0031913 | 3185.740  | 2324.291  | 4047.188  | 1.741 | 0.800 | 0.001 | 0.013 |
| FBgn0004856 | 1302.549  | 950.300   | 1654.798  | 1.741 | 0.800 | 0.001 | 0.014 |
| FBgn0030000 | 390.773   | 285.042   | 496.504   | 1.742 | 0.801 | 0.002 | 0.020 |
| FBgn0032405 | 923.892   | 673.542   | 1174.242  | 1.743 | 0.802 | 0.001 | 0.013 |
| FBgn0259166 | 2113.833  | 1540.752  | 2686.913  | 1.744 | 0.802 | 0.002 | 0.015 |
| FBgn0001145 | 41417.680 | 30187.813 | 52647.547 | 1.744 | 0.802 | 0.002 | 0.017 |
| FBgn0033972 | 1135.155  | 827.350   | 1442.959  | 1.744 | 0.802 | 0.002 | 0.020 |
| FBgn0034918 | 320.526   | 233.581   | 407.471   | 1.744 | 0.803 | 0.005 | 0.037 |
| FBgn0005648 | 1031.427  | 751.454   | 1311.401  | 1.745 | 0.803 | 0.001 | 0.013 |
| FBgn0000180 | 300.765   | 218.913   | 382.617   | 1.748 | 0.806 | 0.007 | 0.045 |
| FBgn0030304 | 5619.016  | 4089.094  | 7148.938  | 1.748 | 0.806 | 0.002 | 0.016 |
| FBgn0015359 | 658.398   | 479.114   | 837.681   | 1.748 | 0.806 | 0.002 | 0.017 |
| FBgn0029838 | 340.829   | 247.834   | 433.824   | 1.750 | 0.808 | 0.005 | 0.038 |



|             |           |           |           |       |       |       |       |
|-------------|-----------|-----------|-----------|-------|-------|-------|-------|
| FBgn0035318 | 859.868   | 625.064   | 1094.672  | 1.751 | 0.808 | 0.001 | 0.014 |
| FBgn0039175 | 642.600   | 466.955   | 818.244   | 1.752 | 0.809 | 0.006 | 0.040 |
| FBgn0030926 | 1291.327  | 938.363   | 1644.292  | 1.752 | 0.809 | 0.003 | 0.024 |
| FBgn0034693 | 8598.554  | 6243.881  | 10953.226 | 1.754 | 0.811 | 0.001 | 0.011 |
| FBgn0050127 | 1486.450  | 1079.008  | 1893.892  | 1.755 | 0.812 | 0.004 | 0.032 |
| FBgn0016041 | 2451.315  | 1779.323  | 3123.306  | 1.755 | 0.812 | 0.001 | 0.007 |
| FBgn0243516 | 2518.142  | 1827.185  | 3209.099  | 1.756 | 0.813 | 0.003 | 0.022 |
| FBgn0011642 | 188.036   | 136.376   | 239.697   | 1.758 | 0.814 | 0.003 | 0.025 |
| FBgn0033649 | 496.222   | 359.863   | 632.582   | 1.758 | 0.814 | 0.007 | 0.047 |
| FBgn0002932 | 193.227   | 140.102   | 246.353   | 1.758 | 0.814 | 0.007 | 0.046 |
| FBgn0031381 | 9155.207  | 6635.311  | 11675.103 | 1.760 | 0.815 | 0.001 | 0.007 |
| FBgn0030347 | 1483.703  | 1074.832  | 1892.574  | 1.761 | 0.816 | 0.001 | 0.011 |
| FBgn0263392 | 8869.419  | 6424.741  | 11314.097 | 1.761 | 0.816 | 0.003 | 0.026 |
| FBgn0030648 | 2826.774  | 2047.592  | 3605.957  | 1.761 | 0.816 | 0.001 | 0.011 |
| FBgn0029176 | 24938.852 | 18059.285 | 31818.418 | 1.762 | 0.817 | 0.003 | 0.023 |
| FBgn0033349 | 1168.501  | 845.829   | 1491.173  | 1.763 | 0.818 | 0.002 | 0.016 |
| FBgn0030096 | 499.709   | 361.632   | 637.787   | 1.764 | 0.819 | 0.003 | 0.026 |
| FBgn0061515 | 3278.911  | 2372.244  | 4185.578  | 1.764 | 0.819 | 0.001 | 0.009 |
| FBgn0025634 | 553.367   | 400.345   | 706.389   | 1.764 | 0.819 | 0.003 | 0.027 |
| FBgn0029858 | 168.364   | 121.804   | 214.924   | 1.765 | 0.819 | 0.007 | 0.046 |
| FBgn0025620 | 4944.856  | 3577.242  | 6312.470  | 1.765 | 0.819 | 0.002 | 0.021 |
| FBgn0262782 | 15643.239 | 11316.420 | 19970.058 | 1.765 | 0.819 | 0.001 | 0.009 |
| FBgn0038930 | 10694.507 | 7735.556  | 13653.459 | 1.765 | 0.820 | 0.000 | 0.004 |
| FBgn0000964 | 446.535   | 322.922   | 570.149   | 1.766 | 0.820 | 0.003 | 0.024 |
| FBgn0040918 | 1376.995  | 995.762   | 1758.228  | 1.766 | 0.820 | 0.001 | 0.009 |
| FBgn0030530 | 819.935   | 592.766   | 1047.103  | 1.766 | 0.821 | 0.002 | 0.020 |
| FBgn0034718 | 2422.815  | 1751.317  | 3094.313  | 1.767 | 0.821 | 0.002 | 0.015 |
| FBgn0038312 | 305.201   | 220.573   | 389.829   | 1.767 | 0.822 | 0.002 | 0.018 |
| FBgn0034646 | 536.178   | 387.418   | 684.938   | 1.768 | 0.822 | 0.002 | 0.018 |
| FBgn0034789 | 7887.482  | 5699.017  | 10075.947 | 1.768 | 0.822 | 0.001 | 0.010 |
| FBgn0000527 | 4973.456  | 3592.868  | 6354.043  | 1.769 | 0.823 | 0.003 | 0.024 |
| FBgn0011297 | 486.325   | 351.281   | 621.368   | 1.769 | 0.823 | 0.002 | 0.017 |
| FBgn0264339 | 1864.055  | 1346.410  | 2381.700  | 1.769 | 0.823 | 0.002 | 0.018 |
| FBgn0039757 | 29745.553 | 21463.434 | 38027.673 | 1.772 | 0.825 | 0.001 | 0.006 |

|             |           |           |           |       |       |       |       |
|-------------|-----------|-----------|-----------|-------|-------|-------|-------|
| FBgn0032751 | 231.452   | 166.974   | 295.930   | 1.772 | 0.826 | 0.001 | 0.011 |
| FBgn0036641 | 264.211   | 190.523   | 337.900   | 1.774 | 0.827 | 0.003 | 0.024 |
| FBgn0031093 | 749.918   | 540.493   | 959.342   | 1.775 | 0.828 | 0.003 | 0.027 |
| FBgn0030056 | 773.198   | 557.125   | 989.272   | 1.776 | 0.828 | 0.002 | 0.016 |
| FBgn0038950 | 1029.867  | 742.023   | 1317.711  | 1.776 | 0.828 | 0.001 | 0.011 |
| FBgn0002579 | 48171.467 | 34700.637 | 61642.298 | 1.776 | 0.829 | 0.005 | 0.038 |
| FBgn0030092 | 271.855   | 195.775   | 347.934   | 1.777 | 0.830 | 0.002 | 0.015 |
| FBgn0033485 | 875.555   | 630.427   | 1120.683  | 1.778 | 0.830 | 0.001 | 0.011 |
| FBgn0031285 | 22552.978 | 16238.794 | 28867.162 | 1.778 | 0.830 | 0.001 | 0.009 |
| FBgn0029824 | 961.262   | 692.092   | 1230.431  | 1.778 | 0.830 | 0.004 | 0.033 |
| FBgn0037342 | 889.452   | 640.328   | 1138.575  | 1.778 | 0.830 | 0.003 | 0.023 |
| FBgn0035251 | 2312.425  | 1664.447  | 2960.402  | 1.779 | 0.831 | 0.005 | 0.034 |
| FBgn0015919 | 308.958   | 222.333   | 395.583   | 1.779 | 0.831 | 0.006 | 0.039 |
| FBgn0028274 | 615.162   | 442.620   | 787.705   | 1.780 | 0.832 | 0.002 | 0.018 |
| FBgn0037956 | 1568.273  | 1128.086  | 2008.460  | 1.780 | 0.832 | 0.001 | 0.007 |
| FBgn0032022 | 3140.018  | 2258.542  | 4021.493  | 1.781 | 0.832 | 0.001 | 0.014 |
| FBgn0030511 | 402.765   | 289.625   | 515.904   | 1.781 | 0.833 | 0.001 | 0.011 |
| FBgn0260855 | 1955.120  | 1405.467  | 2504.773  | 1.782 | 0.834 | 0.001 | 0.009 |
| FBgn0031042 | 280.828   | 201.792   | 359.863   | 1.783 | 0.835 | 0.006 | 0.041 |
| FBgn0034817 | 338.396   | 243.104   | 433.688   | 1.784 | 0.835 | 0.003 | 0.025 |
| FBgn0036958 | 2774.412  | 1992.971  | 3555.853  | 1.784 | 0.835 | 0.001 | 0.012 |
| FBgn0032773 | 12512.045 | 8985.340  | 16038.750 | 1.785 | 0.836 | 0.002 | 0.015 |
| FBgn0016794 | 1428.320  | 1025.483  | 1831.156  | 1.786 | 0.836 | 0.002 | 0.019 |
| FBgn0042696 | 324.415   | 232.814   | 416.016   | 1.787 | 0.837 | 0.006 | 0.043 |
| FBgn0022959 | 5746.957  | 4122.580  | 7371.334  | 1.788 | 0.838 | 0.001 | 0.013 |
| FBgn0032140 | 3257.762  | 2336.250  | 4179.275  | 1.789 | 0.839 | 0.003 | 0.025 |
| FBgn0058263 | 125.547   | 90.008    | 161.086   | 1.790 | 0.840 | 0.005 | 0.038 |
| FBgn0033188 | 5206.401  | 3732.054  | 6680.749  | 1.790 | 0.840 | 0.000 | 0.006 |
| FBgn0042650 | 1794.822  | 1286.251  | 2303.394  | 1.791 | 0.841 | 0.001 | 0.013 |
| FBgn0037121 | 348.408   | 249.660   | 447.156   | 1.791 | 0.841 | 0.001 | 0.011 |
| FBgn0031895 | 518.697   | 371.628   | 665.765   | 1.791 | 0.841 | 0.003 | 0.024 |
| FBgn0052479 | 2834.603  | 2029.874  | 3639.331  | 1.793 | 0.842 | 0.005 | 0.036 |
| FBgn0035141 | 226.543   | 162.224   | 290.861   | 1.793 | 0.842 | 0.002 | 0.017 |
| FBgn0029580 | 289.005   | 206.885   | 371.126   | 1.794 | 0.843 | 0.003 | 0.026 |

|             |           |           |           |       |       |       |       |
|-------------|-----------|-----------|-----------|-------|-------|-------|-------|
| FBgn0024509 | 1842.561  | 1318.790  | 2366.331  | 1.794 | 0.843 | 0.001 | 0.011 |
| FBgn0031391 | 662.731   | 474.290   | 851.173   | 1.795 | 0.844 | 0.002 | 0.019 |
| FBgn0030878 | 1051.661  | 752.268   | 1351.055  | 1.796 | 0.845 | 0.001 | 0.009 |
| FBgn0034588 | 9565.836  | 6841.264  | 12290.409 | 1.797 | 0.845 | 0.001 | 0.008 |
| FBgn0051232 | 682.542   | 488.063   | 877.020   | 1.797 | 0.846 | 0.005 | 0.035 |
| FBgn0035529 | 706.740   | 504.879   | 908.600   | 1.800 | 0.848 | 0.001 | 0.007 |
| FBgn0027950 | 1358.474  | 970.316   | 1746.632  | 1.800 | 0.848 | 0.001 | 0.008 |
| FBgn0040850 | 612.941   | 437.628   | 788.255   | 1.801 | 0.849 | 0.002 | 0.016 |
| FBgn0027343 | 186.739   | 133.318   | 240.160   | 1.801 | 0.849 | 0.006 | 0.043 |
| FBgn0259715 | 6875.268  | 4905.342  | 8845.193  | 1.803 | 0.851 | 0.001 | 0.008 |
| FBgn0260648 | 168.807   | 120.405   | 217.208   | 1.804 | 0.851 | 0.004 | 0.029 |
| FBgn0038819 | 244.086   | 173.960   | 314.213   | 1.806 | 0.853 | 0.007 | 0.046 |
| FBgn0030057 | 258.057   | 183.871   | 332.243   | 1.807 | 0.854 | 0.004 | 0.029 |
| FBgn0036285 | 419.674   | 298.614   | 540.733   | 1.811 | 0.857 | 0.001 | 0.011 |
| FBgn0016693 | 4048.771  | 2880.759  | 5216.782  | 1.811 | 0.857 | 0.001 | 0.007 |
| FBgn0085212 | 160.529   | 114.199   | 206.860   | 1.811 | 0.857 | 0.002 | 0.021 |
| FBgn0030581 | 5738.532  | 4078.510  | 7398.554  | 1.814 | 0.859 | 0.000 | 0.006 |
| FBgn0021944 | 411.843   | 292.480   | 531.206   | 1.816 | 0.861 | 0.002 | 0.018 |
| FBgn0032694 | 1100.957  | 781.813   | 1420.100  | 1.816 | 0.861 | 0.002 | 0.016 |
| FBgn0031682 | 484.329   | 343.932   | 624.727   | 1.816 | 0.861 | 0.005 | 0.039 |
| FBgn0025678 | 1318.571  | 936.271   | 1700.871  | 1.817 | 0.861 | 0.002 | 0.016 |
| FBgn0035404 | 5922.359  | 4204.440  | 7640.277  | 1.817 | 0.862 | 0.000 | 0.003 |
| FBgn0033520 | 229.832   | 163.098   | 296.566   | 1.818 | 0.863 | 0.001 | 0.009 |
| FBgn0010877 | 2051.395  | 1455.587  | 2647.202  | 1.819 | 0.863 | 0.001 | 0.011 |
| FBgn0026879 | 4049.182  | 2872.719  | 5225.645  | 1.819 | 0.863 | 0.003 | 0.024 |
| FBgn0030638 | 919.948   | 652.430   | 1187.466  | 1.820 | 0.864 | 0.004 | 0.029 |
| FBgn0002622 | 49563.673 | 35134.075 | 63993.271 | 1.821 | 0.865 | 0.000 | 0.005 |
| FBgn0003978 | 349.441   | 247.701   | 451.182   | 1.821 | 0.865 | 0.002 | 0.019 |
| FBgn0010387 | 3950.188  | 2799.235  | 5101.141  | 1.822 | 0.866 | 0.005 | 0.035 |
| FBgn0052085 | 1886.966  | 1337.078  | 2436.853  | 1.823 | 0.866 | 0.001 | 0.014 |
| FBgn0040382 | 15916.491 | 11277.071 | 20555.910 | 1.823 | 0.866 | 0.000 | 0.004 |
| FBgn0037374 | 1424.739  | 1008.519  | 1840.959  | 1.825 | 0.868 | 0.000 | 0.003 |
| FBgn0015221 | 15571.646 | 11020.487 | 20122.804 | 1.826 | 0.869 | 0.005 | 0.035 |
| FBgn0034753 | 9388.376  | 6644.282  | 12132.470 | 1.826 | 0.869 | 0.001 | 0.010 |

|             |           |           |           |       |       |       |       |
|-------------|-----------|-----------|-----------|-------|-------|-------|-------|
| FBgn0029594 | 1226.112  | 867.477   | 1584.747  | 1.827 | 0.869 | 0.002 | 0.015 |
| FBgn0040900 | 142.016   | 100.456   | 183.575   | 1.827 | 0.870 | 0.006 | 0.044 |
| FBgn0261592 | 37508.772 | 26514.679 | 48502.865 | 1.829 | 0.871 | 0.001 | 0.011 |
| FBgn0037024 | 1208.497  | 853.894   | 1563.100  | 1.831 | 0.872 | 0.000 | 0.005 |
| FBgn0003068 | 1001.513  | 707.446   | 1295.580  | 1.831 | 0.873 | 0.002 | 0.015 |
| FBgn0030532 | 1167.564  | 824.538   | 1510.590  | 1.832 | 0.873 | 0.001 | 0.014 |
| FBgn0003651 | 2482.050  | 1751.990  | 3212.110  | 1.833 | 0.875 | 0.001 | 0.009 |
| FBgn0022774 | 1855.659  | 1309.253  | 2402.064  | 1.835 | 0.876 | 0.001 | 0.012 |
| FBgn0033101 | 1256.780  | 886.457   | 1627.102  | 1.836 | 0.876 | 0.001 | 0.008 |
| FBgn0031805 | 1280.903  | 903.161   | 1658.644  | 1.836 | 0.877 | 0.001 | 0.012 |
| FBgn0250837 | 202.974   | 143.103   | 262.845   | 1.837 | 0.877 | 0.005 | 0.034 |
| FBgn0038815 | 971.547   | 684.740   | 1258.354  | 1.838 | 0.878 | 0.001 | 0.008 |
| FBgn0087002 | 6537.083  | 4605.445  | 8468.721  | 1.839 | 0.879 | 0.002 | 0.017 |
| FBgn0015737 | 6008.437  | 4231.073  | 7785.802  | 1.840 | 0.880 | 0.004 | 0.029 |
| FBgn0026428 | 9434.629  | 6643.720  | 12225.538 | 1.840 | 0.880 | 0.000 | 0.005 |
| FBgn0000097 | 2464.013  | 1732.022  | 3196.003  | 1.845 | 0.884 | 0.005 | 0.039 |
| FBgn0030026 | 529.353   | 372.077   | 686.629   | 1.845 | 0.884 | 0.001 | 0.012 |
| FBgn0036997 | 555.616   | 390.504   | 720.728   | 1.846 | 0.884 | 0.001 | 0.011 |
| FBgn0031395 | 1137.118  | 799.026   | 1475.211  | 1.846 | 0.885 | 0.000 | 0.004 |
| FBgn0039710 | 702.637   | 493.539   | 911.735   | 1.847 | 0.885 | 0.000 | 0.004 |
| FBgn0039238 | 1247.765  | 876.166   | 1619.364  | 1.848 | 0.886 | 0.000 | 0.003 |
| FBgn0033925 | 645.132   | 452.959   | 837.306   | 1.849 | 0.886 | 0.000 | 0.006 |
| FBgn0029529 | 1102.054  | 773.583   | 1430.524  | 1.849 | 0.887 | 0.004 | 0.031 |
| FBgn0014388 | 2947.371  | 2068.865  | 3825.876  | 1.849 | 0.887 | 0.000 | 0.004 |
| FBgn0036342 | 353.399   | 248.003   | 458.795   | 1.850 | 0.887 | 0.000 | 0.005 |
| FBgn0039525 | 741.079   | 519.733   | 962.424   | 1.852 | 0.889 | 0.000 | 0.002 |
| FBgn0025682 | 4312.991  | 3023.325  | 5602.657  | 1.853 | 0.890 | 0.002 | 0.017 |
| FBgn0041607 | 2401.507  | 1683.283  | 3119.731  | 1.853 | 0.890 | 0.001 | 0.009 |
| FBgn0010333 | 2558.141  | 1792.929  | 3323.353  | 1.854 | 0.890 | 0.002 | 0.020 |
| FBgn0029905 | 948.427   | 664.189   | 1232.664  | 1.856 | 0.892 | 0.007 | 0.049 |
| FBgn0026753 | 7142.050  | 5001.033  | 9283.067  | 1.856 | 0.892 | 0.000 | 0.002 |
| FBgn0015527 | 752.929   | 527.072   | 978.787   | 1.857 | 0.893 | 0.001 | 0.009 |
| FBgn0000568 | 7548.920  | 5284.332  | 9813.509  | 1.857 | 0.893 | 0.001 | 0.012 |
| FBgn0026721 | 4588.413  | 3211.425  | 5965.401  | 1.858 | 0.893 | 0.000 | 0.006 |

|             |           |           |           |       |       |       |       |
|-------------|-----------|-----------|-----------|-------|-------|-------|-------|
| FBgn0031059 | 298.959   | 209.052   | 388.867   | 1.860 | 0.895 | 0.002 | 0.017 |
| FBgn0039802 | 1241.163  | 867.114   | 1615.211  | 1.863 | 0.897 | 0.000 | 0.002 |
| FBgn0033926 | 5252.047  | 3669.056  | 6835.038  | 1.863 | 0.898 | 0.000 | 0.003 |
| FBgn0053558 | 7538.281  | 5259.722  | 9816.841  | 1.866 | 0.900 | 0.001 | 0.006 |
| FBgn0034919 | 811.772   | 566.393   | 1057.151  | 1.866 | 0.900 | 0.001 | 0.011 |
| FBgn0013303 | 111.399   | 77.654    | 145.144   | 1.869 | 0.902 | 0.005 | 0.038 |
| FBgn0030773 | 12573.709 | 8763.495  | 16383.923 | 1.870 | 0.903 | 0.000 | 0.001 |
| FBgn0000617 | 263.187   | 183.368   | 343.006   | 1.871 | 0.903 | 0.002 | 0.021 |
| FBgn0029939 | 835.338   | 581.954   | 1088.721  | 1.871 | 0.904 | 0.002 | 0.015 |
| FBgn0014857 | 3145.891  | 2191.564  | 4100.217  | 1.871 | 0.904 | 0.000 | 0.002 |
| FBgn0011272 | 29723.705 | 20699.884 | 38747.525 | 1.872 | 0.904 | 0.007 | 0.049 |
| FBgn0023215 | 4501.925  | 3133.961  | 5869.888  | 1.873 | 0.905 | 0.002 | 0.017 |
| FBgn0030479 | 10284.467 | 7151.146  | 13417.788 | 1.876 | 0.908 | 0.007 | 0.044 |
| FBgn0031061 | 1001.201  | 696.112   | 1306.289  | 1.877 | 0.908 | 0.001 | 0.008 |
| FBgn0032781 | 537.067   | 373.371   | 700.763   | 1.877 | 0.908 | 0.002 | 0.015 |
| FBgn0051548 | 1629.074  | 1132.319  | 2125.829  | 1.877 | 0.909 | 0.000 | 0.003 |
| FBgn0010774 | 1928.628  | 1340.014  | 2517.242  | 1.879 | 0.910 | 0.000 | 0.004 |
| FBgn0038834 | 36890.560 | 25628.929 | 48152.191 | 1.879 | 0.910 | 0.000 | 0.001 |
| FBgn0039698 | 820.197   | 569.549   | 1070.844  | 1.880 | 0.911 | 0.001 | 0.013 |
| FBgn0033351 | 521.048   | 361.684   | 680.412   | 1.881 | 0.912 | 0.004 | 0.032 |
| FBgn0261394 | 1804.778  | 1251.945  | 2357.610  | 1.883 | 0.913 | 0.000 | 0.004 |
| FBgn0023212 | 3423.695  | 2374.925  | 4472.466  | 1.883 | 0.913 | 0.000 | 0.003 |
| FBgn0037354 | 1109.605  | 768.734   | 1450.475  | 1.887 | 0.916 | 0.000 | 0.002 |
| FBgn0014859 | 697.977   | 483.453   | 912.500   | 1.887 | 0.916 | 0.001 | 0.011 |
| FBgn0010531 | 380.768   | 263.686   | 497.850   | 1.888 | 0.917 | 0.001 | 0.013 |
| FBgn0038829 | 2166.801  | 1499.891  | 2833.712  | 1.889 | 0.918 | 0.007 | 0.045 |
| FBgn0260944 | 2566.544  | 1775.734  | 3357.354  | 1.891 | 0.919 | 0.002 | 0.018 |
| FBgn0030935 | 74.954    | 51.853    | 98.055    | 1.891 | 0.919 | 0.007 | 0.046 |
| FBgn0031099 | 1654.960  | 1144.851  | 2165.068  | 1.891 | 0.919 | 0.000 | 0.002 |
| FBgn0259144 | 329.649   | 227.758   | 431.539   | 1.895 | 0.922 | 0.000 | 0.002 |
| FBgn0030802 | 1220.329  | 842.634   | 1598.023  | 1.896 | 0.923 | 0.001 | 0.014 |
| FBgn0004867 | 26189.128 | 18080.776 | 34297.481 | 1.897 | 0.924 | 0.001 | 0.009 |
| FBgn0035267 | 1680.334  | 1159.324  | 2201.345  | 1.899 | 0.925 | 0.000 | 0.006 |
| FBgn0034970 | 1013.475  | 698.435   | 1328.516  | 1.902 | 0.928 | 0.000 | 0.004 |

|             |           |           |           |       |       |       |       |
|-------------|-----------|-----------|-----------|-------|-------|-------|-------|
| FBgn0040532 | 17020.002 | 11720.734 | 22319.269 | 1.904 | 0.929 | 0.000 | 0.003 |
| FBgn0024814 | 3395.424  | 2338.146  | 4452.702  | 1.904 | 0.929 | 0.000 | 0.002 |
| FBgn0019624 | 19871.978 | 13679.928 | 26064.028 | 1.905 | 0.930 | 0.000 | 0.006 |
| FBgn0035147 | 2597.888  | 1787.726  | 3408.050  | 1.906 | 0.931 | 0.001 | 0.007 |
| FBgn0035035 | 254.299   | 174.984   | 333.614   | 1.907 | 0.931 | 0.002 | 0.020 |
| FBgn0001149 | 16973.596 | 11679.388 | 22267.805 | 1.907 | 0.931 | 0.000 | 0.005 |
| FBgn0037110 | 982.417   | 675.571   | 1289.264  | 1.908 | 0.932 | 0.003 | 0.026 |
| FBgn0039654 | 397.476   | 273.311   | 521.641   | 1.909 | 0.933 | 0.001 | 0.014 |
| FBgn0025382 | 667.727   | 458.970   | 876.484   | 1.910 | 0.933 | 0.001 | 0.008 |
| FBgn0000308 | 7662.382  | 5262.207  | 10062.556 | 1.912 | 0.935 | 0.006 | 0.040 |
| FBgn0011837 | 2249.492  | 1544.509  | 2954.475  | 1.913 | 0.936 | 0.001 | 0.007 |
| FBgn0000150 | 14425.443 | 9903.791  | 18947.095 | 1.913 | 0.936 | 0.000 | 0.006 |
| FBgn0030012 | 208.290   | 142.984   | 273.596   | 1.913 | 0.936 | 0.004 | 0.032 |
| FBgn0028906 | 506.442   | 347.379   | 665.505   | 1.916 | 0.938 | 0.008 | 0.050 |
| FBgn0036732 | 1344.577  | 921.645   | 1767.509  | 1.918 | 0.939 | 0.000 | 0.004 |
| FBgn0016120 | 15499.866 | 10624.054 | 20375.678 | 1.918 | 0.940 | 0.000 | 0.001 |
| FBgn0029897 | 23755.632 | 16269.318 | 31241.946 | 1.920 | 0.941 | 0.002 | 0.015 |
| FBgn0031020 | 2107.453  | 1442.775  | 2772.131  | 1.921 | 0.942 | 0.000 | 0.006 |
| FBgn0031489 | 866.209   | 592.913   | 1139.504  | 1.922 | 0.943 | 0.002 | 0.022 |
| FBgn0011758 | 249.639   | 170.826   | 328.451   | 1.923 | 0.943 | 0.008 | 0.049 |
| FBgn0036157 | 579.644   | 396.641   | 762.647   | 1.923 | 0.943 | 0.006 | 0.043 |
| FBgn0039406 | 4826.463  | 3301.687  | 6351.240  | 1.924 | 0.944 | 0.001 | 0.007 |
| FBgn0041629 | 3714.388  | 2540.466  | 4888.310  | 1.924 | 0.944 | 0.000 | 0.002 |
| FBgn0038769 | 259.620   | 177.481   | 341.759   | 1.926 | 0.945 | 0.000 | 0.005 |
| FBgn0035734 | 1426.914  | 975.424   | 1878.404  | 1.926 | 0.945 | 0.000 | 0.004 |
| FBgn0030305 | 686.106   | 468.849   | 903.363   | 1.927 | 0.946 | 0.000 | 0.006 |
| FBgn0038868 | 938.804   | 641.217   | 1236.390  | 1.928 | 0.947 | 0.000 | 0.006 |
| FBgn0013764 | 1640.165  | 1120.171  | 2160.159  | 1.928 | 0.947 | 0.000 | 0.004 |
| FBgn0029755 | 557.172   | 380.453   | 733.891   | 1.929 | 0.948 | 0.000 | 0.004 |
| FBgn0029854 | 1473.061  | 1005.799  | 1940.323  | 1.929 | 0.948 | 0.000 | 0.004 |
| FBgn0010409 | 27498.929 | 18774.578 | 36223.281 | 1.929 | 0.948 | 0.007 | 0.047 |
| FBgn0036314 | 606.937   | 413.952   | 799.923   | 1.932 | 0.950 | 0.000 | 0.004 |
| FBgn0026401 | 369.479   | 251.895   | 487.063   | 1.934 | 0.951 | 0.001 | 0.007 |
| FBgn0063670 | 150.683   | 102.726   | 198.641   | 1.934 | 0.951 | 0.003 | 0.022 |

|             |           |           |           |       |       |       |       |
|-------------|-----------|-----------|-----------|-------|-------|-------|-------|
| FBgn0050410 | 1764.102  | 1202.449  | 2325.754  | 1.934 | 0.952 | 0.000 | 0.002 |
| FBgn0032884 | 2914.629  | 1986.147  | 3843.110  | 1.935 | 0.952 | 0.004 | 0.030 |
| FBgn0020279 | 10641.299 | 7243.462  | 14039.135 | 1.938 | 0.955 | 0.000 | 0.003 |
| FBgn0052549 | 8837.348  | 6011.750  | 11662.946 | 1.940 | 0.956 | 0.000 | 0.003 |
| FBgn0004132 | 971.606   | 660.881   | 1282.332  | 1.940 | 0.956 | 0.000 | 0.002 |
| FBgn0039305 | 743.133   | 505.310   | 980.955   | 1.941 | 0.957 | 0.000 | 0.001 |
| FBgn0058470 | 57.611    | 39.162    | 76.060    | 1.942 | 0.958 | 0.006 | 0.044 |
| FBgn0003330 | 514.754   | 349.900   | 679.608   | 1.942 | 0.958 | 0.000 | 0.006 |
| FBgn0021765 | 5840.431  | 3969.394  | 7711.468  | 1.943 | 0.958 | 0.002 | 0.020 |
| FBgn0030400 | 4469.066  | 3036.789  | 5901.343  | 1.943 | 0.958 | 0.002 | 0.017 |
| FBgn0034330 | 112.111   | 76.047    | 148.175   | 1.948 | 0.962 | 0.000 | 0.006 |
| FBgn0261602 | 29769.531 | 20189.625 | 39349.437 | 1.949 | 0.963 | 0.001 | 0.007 |
| FBgn0038043 | 1167.657  | 791.632   | 1543.682  | 1.950 | 0.963 | 0.000 | 0.002 |
| FBgn0000053 | 3005.545  | 2034.224  | 3976.866  | 1.955 | 0.967 | 0.001 | 0.009 |
| FBgn0261597 | 33581.109 | 22710.698 | 44451.521 | 1.957 | 0.969 | 0.006 | 0.040 |
| FBgn0028480 | 14560.382 | 9843.457  | 19277.307 | 1.958 | 0.970 | 0.000 | 0.001 |
| FBgn0038806 | 598.671   | 404.174   | 793.168   | 1.962 | 0.973 | 0.000 | 0.005 |
| FBgn0036373 | 980.377   | 661.859   | 1298.896  | 1.962 | 0.973 | 0.001 | 0.007 |
| FBgn0002941 | 197.991   | 133.662   | 262.321   | 1.963 | 0.973 | 0.002 | 0.020 |
| FBgn0029799 | 1384.186  | 934.265   | 1834.106  | 1.963 | 0.973 | 0.000 | 0.003 |
| FBgn0263997 | 1438.088  | 969.702   | 1906.474  | 1.966 | 0.975 | 0.000 | 0.005 |
| FBgn0013954 | 9864.053  | 6648.453  | 13079.652 | 1.967 | 0.976 | 0.001 | 0.006 |
| FBgn0010038 | 163.684   | 110.320   | 217.048   | 1.967 | 0.976 | 0.003 | 0.023 |
| FBgn0039635 | 7767.896  | 5229.913  | 10305.879 | 1.971 | 0.979 | 0.000 | 0.001 |
| FBgn0030177 | 612.249   | 412.151   | 812.347   | 1.971 | 0.979 | 0.000 | 0.006 |
| FBgn0000157 | 520.085   | 350.083   | 690.087   | 1.971 | 0.979 | 0.000 | 0.002 |
| FBgn0262601 | 183.808   | 123.726   | 243.890   | 1.971 | 0.979 | 0.000 | 0.004 |
| FBgn0052267 | 1197.083  | 805.388   | 1588.777  | 1.973 | 0.980 | 0.002 | 0.016 |
| FBgn0036341 | 1526.973  | 1027.334  | 2026.611  | 1.973 | 0.980 | 0.000 | 0.002 |
| FBgn0037312 | 1107.075  | 744.412   | 1469.737  | 1.974 | 0.981 | 0.000 | 0.004 |
| FBgn0033987 | 3185.318  | 2139.822  | 4230.814  | 1.977 | 0.983 | 0.000 | 0.002 |
| FBgn0000153 | 2525.433  | 1696.436  | 3354.430  | 1.977 | 0.984 | 0.000 | 0.005 |
| FBgn0085369 | 593.390   | 398.583   | 788.197   | 1.977 | 0.984 | 0.004 | 0.033 |
| FBgn0030218 | 861.526   | 578.629   | 1144.424  | 1.978 | 0.984 | 0.000 | 0.004 |

|             |           |           |           |       |       |       |       |
|-------------|-----------|-----------|-----------|-------|-------|-------|-------|
| FBgn0031022 | 208.243   | 139.833   | 276.653   | 1.978 | 0.984 | 0.000 | 0.004 |
| FBgn0051997 | 161.441   | 108.347   | 214.535   | 1.980 | 0.986 | 0.001 | 0.011 |
| FBgn0030839 | 341.222   | 228.879   | 453.564   | 1.982 | 0.987 | 0.007 | 0.047 |
| FBgn0041184 | 1184.340  | 794.239   | 1574.442  | 1.982 | 0.987 | 0.000 | 0.006 |
| FBgn0031053 | 245.017   | 164.126   | 325.908   | 1.986 | 0.990 | 0.001 | 0.014 |
| FBgn0004396 | 761.235   | 509.463   | 1013.006  | 1.988 | 0.992 | 0.007 | 0.046 |
| FBgn0039332 | 2820.964  | 1887.872  | 3754.055  | 1.989 | 0.992 | 0.001 | 0.010 |
| FBgn0029969 | 2497.228  | 1671.108  | 3323.348  | 1.989 | 0.992 | 0.001 | 0.008 |
| FBgn0264490 | 11240.436 | 7514.742  | 14966.130 | 1.992 | 0.994 | 0.004 | 0.032 |
| FBgn0027087 | 1720.730  | 1149.759  | 2291.700  | 1.993 | 0.995 | 0.000 | 0.003 |
| FBgn0004854 | 240.720   | 160.677   | 320.764   | 1.996 | 0.997 | 0.001 | 0.009 |
| FBgn0039970 | 304.126   | 202.734   | 405.519   | 2.000 | 1.000 | 0.000 | 0.002 |
| FBgn0085257 | 150.467   | 100.212   | 200.722   | 2.003 | 1.002 | 0.001 | 0.011 |
| FBgn0030877 | 238.436   | 158.700   | 318.172   | 2.005 | 1.004 | 0.001 | 0.008 |
| FBgn0035993 | 738.604   | 491.532   | 985.677   | 2.005 | 1.004 | 0.000 | 0.001 |
| FBgn0000179 | 1482.363  | 985.672   | 1979.054  | 2.008 | 1.006 | 0.000 | 0.001 |
| FBgn0046214 | 1996.929  | 1327.235  | 2666.623  | 2.009 | 1.007 | 0.000 | 0.001 |
| FBgn0023214 | 364.451   | 242.172   | 486.729   | 2.010 | 1.007 | 0.000 | 0.004 |
| FBgn0031315 | 514.480   | 341.781   | 687.179   | 2.011 | 1.008 | 0.000 | 0.002 |
| FBgn0026238 | 115.761   | 76.888    | 154.634   | 2.011 | 1.008 | 0.005 | 0.036 |
| FBgn0036825 | 29432.146 | 19521.798 | 39342.494 | 2.015 | 1.011 | 0.001 | 0.011 |
| FBgn0052521 | 19809.884 | 13139.162 | 26480.606 | 2.015 | 1.011 | 0.000 | 0.001 |
| FBgn0030993 | 839.342   | 556.687   | 1121.996  | 2.015 | 1.011 | 0.000 | 0.004 |
| FBgn0262734 | 7886.638  | 5229.717  | 10543.559 | 2.016 | 1.012 | 0.000 | 0.003 |
| FBgn0032871 | 192.755   | 127.523   | 257.987   | 2.023 | 1.017 | 0.000 | 0.004 |
| FBgn0002174 | 1103.515  | 729.892   | 1477.137  | 2.024 | 1.017 | 0.000 | 0.001 |
| FBgn0029857 | 755.453   | 499.486   | 1011.419  | 2.025 | 1.018 | 0.000 | 0.001 |
| FBgn0037166 | 499.984   | 330.573   | 669.395   | 2.025 | 1.018 | 0.001 | 0.013 |
| FBgn0086472 | 72004.464 | 47602.103 | 96406.825 | 2.025 | 1.018 | 0.000 | 0.001 |
| FBgn0035348 | 5908.982  | 3904.234  | 7913.729  | 2.027 | 1.019 | 0.000 | 0.002 |
| FBgn0004606 | 1469.678  | 970.583   | 1968.773  | 2.028 | 1.020 | 0.000 | 0.002 |
| FBgn0030828 | 2338.755  | 1542.461  | 3135.049  | 2.032 | 1.023 | 0.000 | 0.001 |
| FBgn0002031 | 1781.353  | 1174.102  | 2388.605  | 2.034 | 1.025 | 0.000 | 0.001 |
| FBgn0261285 | 4699.503  | 3093.245  | 6305.761  | 2.039 | 1.028 | 0.000 | 0.001 |



|             |           |           |           |       |       |       |       |
|-------------|-----------|-----------|-----------|-------|-------|-------|-------|
| FBgn0028542 | 592.072   | 389.419   | 794.724   | 2.041 | 1.029 | 0.000 | 0.003 |
| FBgn0034242 | 1589.411  | 1044.813  | 2134.009  | 2.042 | 1.030 | 0.000 | 0.000 |
| FBgn0000181 | 17251.579 | 11338.200 | 23164.958 | 2.043 | 1.031 | 0.000 | 0.000 |
| FBgn0250814 | 16226.571 | 10657.910 | 21795.232 | 2.045 | 1.032 | 0.000 | 0.003 |
| FBgn0036039 | 1622.499  | 1065.495  | 2179.504  | 2.046 | 1.032 | 0.000 | 0.001 |
| FBgn0023519 | 625.029   | 410.214   | 839.843   | 2.047 | 1.034 | 0.000 | 0.001 |
| FBgn0037351 | 46736.680 | 30668.455 | 62804.906 | 2.048 | 1.034 | 0.001 | 0.008 |
| FBgn0030669 | 1609.305  | 1055.781  | 2162.829  | 2.049 | 1.035 | 0.000 | 0.000 |
| FBgn0034915 | 705.092   | 462.438   | 947.747   | 2.049 | 1.035 | 0.000 | 0.001 |
| FBgn0013263 | 327.271   | 214.482   | 440.060   | 2.052 | 1.037 | 0.006 | 0.041 |
| FBgn0053993 | 934.534   | 611.512   | 1257.557  | 2.056 | 1.040 | 0.000 | 0.004 |
| FBgn0034885 | 9786.135  | 6398.410  | 13173.860 | 2.059 | 1.042 | 0.000 | 0.006 |
| FBgn0021906 | 13529.054 | 8844.172  | 18213.936 | 2.059 | 1.042 | 0.000 | 0.004 |
| FBgn0030963 | 105.447   | 68.900    | 141.994   | 2.061 | 1.043 | 0.005 | 0.039 |
| FBgn0034743 | 19426.458 | 12692.266 | 26160.649 | 2.061 | 1.043 | 0.000 | 0.000 |
| FBgn0002525 | 1403.310  | 914.802   | 1891.817  | 2.068 | 1.048 | 0.000 | 0.001 |
| FBgn0003714 | 849.656   | 553.813   | 1145.499  | 2.068 | 1.049 | 0.000 | 0.001 |
| FBgn0033907 | 809.123   | 527.328   | 1090.919  | 2.069 | 1.049 | 0.002 | 0.015 |
| FBgn0052230 | 579.559   | 377.440   | 781.678   | 2.071 | 1.050 | 0.005 | 0.038 |
| FBgn0020618 | 58287.473 | 37923.347 | 78651.598 | 2.074 | 1.052 | 0.002 | 0.016 |
| FBgn0035553 | 2216.496  | 1442.022  | 2990.971  | 2.074 | 1.053 | 0.000 | 0.001 |
| FBgn0004654 | 4773.003  | 3103.405  | 6442.602  | 2.076 | 1.054 | 0.006 | 0.044 |
| FBgn0032538 | 4107.823  | 2670.343  | 5545.304  | 2.077 | 1.054 | 0.003 | 0.026 |
| FBgn0263512 | 401.061   | 260.464   | 541.659   | 2.080 | 1.056 | 0.001 | 0.007 |
| FBgn0001297 | 5252.815  | 3411.243  | 7094.386  | 2.080 | 1.056 | 0.000 | 0.001 |
| FBgn0263390 | 2398.466  | 1556.862  | 3240.071  | 2.081 | 1.057 | 0.007 | 0.046 |
| FBgn0034069 | 733.194   | 475.871   | 990.517   | 2.081 | 1.058 | 0.000 | 0.002 |
| FBgn0034501 | 14265.456 | 9257.722  | 19273.191 | 2.082 | 1.058 | 0.000 | 0.003 |
| FBgn0002590 | 25995.151 | 16869.364 | 35120.937 | 2.082 | 1.058 | 0.000 | 0.005 |
| FBgn0003137 | 14319.746 | 9287.196  | 19352.297 | 2.084 | 1.059 | 0.000 | 0.002 |
| FBgn0021967 | 10173.925 | 6596.445  | 13751.404 | 2.085 | 1.060 | 0.000 | 0.000 |
| FBgn0051390 | 882.941   | 572.442   | 1193.440  | 2.085 | 1.060 | 0.000 | 0.001 |
| FBgn0086357 | 5823.117  | 3774.969  | 7871.265  | 2.085 | 1.060 | 0.000 | 0.001 |
| FBgn0034758 | 175.775   | 113.940   | 237.609   | 2.085 | 1.060 | 0.000 | 0.001 |

|             |           |           |           |       |       |       |       |
|-------------|-----------|-----------|-----------|-------|-------|-------|-------|
| FBgn0039212 | 692.164   | 448.461   | 935.867   | 2.087 | 1.061 | 0.000 | 0.001 |
| FBgn0031376 | 2977.804  | 1927.580  | 4028.028  | 2.090 | 1.063 | 0.000 | 0.003 |
| FBgn0040653 | 59868.478 | 38733.756 | 81003.199 | 2.091 | 1.064 | 0.007 | 0.046 |
| FBgn0000529 | 198.534   | 128.418   | 268.650   | 2.092 | 1.065 | 0.000 | 0.005 |
| FBgn0031060 | 294.234   | 190.298   | 398.171   | 2.092 | 1.065 | 0.003 | 0.022 |
| FBgn0029131 | 1244.899  | 805.081   | 1684.717  | 2.093 | 1.065 | 0.000 | 0.001 |
| FBgn0029929 | 524.518   | 338.875   | 710.161   | 2.096 | 1.067 | 0.000 | 0.001 |
| FBgn0053481 | 140.180   | 90.549    | 189.812   | 2.096 | 1.068 | 0.001 | 0.011 |
| FBgn0086446 | 989.305   | 638.646   | 1339.965  | 2.098 | 1.069 | 0.000 | 0.002 |
| FBgn0015019 | 1516.110  | 978.724   | 2053.496  | 2.098 | 1.069 | 0.000 | 0.001 |
| FBgn0261534 | 1407.770  | 908.312   | 1907.227  | 2.100 | 1.070 | 0.004 | 0.029 |
| FBgn0263970 | 54.823    | 35.365    | 74.282    | 2.100 | 1.071 | 0.004 | 0.031 |
| FBgn0261881 | 483.195   | 311.196   | 655.195   | 2.105 | 1.074 | 0.000 | 0.000 |
| FBgn0013305 | 5726.233  | 3683.369  | 7769.096  | 2.109 | 1.077 | 0.001 | 0.010 |
| FBgn0040660 | 4280.678  | 2751.198  | 5810.159  | 2.112 | 1.079 | 0.000 | 0.000 |
| FBgn0261792 | 636.822   | 408.873   | 864.771   | 2.115 | 1.081 | 0.000 | 0.000 |
| FBgn0052484 | 1572.817  | 1009.350  | 2136.285  | 2.116 | 1.082 | 0.001 | 0.007 |
| FBgn0030196 | 418.628   | 268.465   | 568.791   | 2.119 | 1.083 | 0.001 | 0.012 |
| FBgn0035534 | 702.293   | 450.096   | 954.490   | 2.121 | 1.084 | 0.000 | 0.000 |
| FBgn0003002 | 206.351   | 131.290   | 281.413   | 2.143 | 1.100 | 0.002 | 0.015 |
| FBgn0031800 | 1282.661  | 814.924   | 1750.399  | 2.148 | 1.103 | 0.000 | 0.000 |
| FBgn0263239 | 257.533   | 163.619   | 351.447   | 2.148 | 1.103 | 0.000 | 0.002 |
| FBgn0038808 | 1055.950  | 670.223   | 1441.676  | 2.151 | 1.105 | 0.001 | 0.008 |
| FBgn0013469 | 185.884   | 117.870   | 253.898   | 2.154 | 1.107 | 0.000 | 0.002 |
| FBgn0032803 | 1064.909  | 674.341   | 1455.476  | 2.158 | 1.110 | 0.000 | 0.002 |
| FBgn0028926 | 472.103   | 298.849   | 645.358   | 2.159 | 1.111 | 0.000 | 0.000 |
| FBgn0086680 | 2726.534  | 1720.481  | 3732.587  | 2.170 | 1.117 | 0.000 | 0.002 |
| FBgn0040337 | 459.677   | 289.435   | 629.920   | 2.176 | 1.122 | 0.000 | 0.002 |
| FBgn0013680 | 190.511   | 119.934   | 261.087   | 2.177 | 1.122 | 0.000 | 0.000 |
| FBgn0005670 | 56.250    | 35.372    | 77.129    | 2.181 | 1.125 | 0.002 | 0.019 |
| FBgn0011787 | 1608.713  | 1010.918  | 2206.508  | 2.183 | 1.126 | 0.001 | 0.007 |
| FBgn0034010 | 1068.746  | 671.409   | 1466.082  | 2.184 | 1.127 | 0.000 | 0.001 |
| FBgn0033162 | 1394.735  | 874.759   | 1914.712  | 2.189 | 1.130 | 0.000 | 0.000 |
| FBgn0262124 | 105.671   | 66.143    | 145.199   | 2.195 | 1.134 | 0.002 | 0.017 |

|             |           |           |           |       |       |       |       |
|-------------|-----------|-----------|-----------|-------|-------|-------|-------|
| FBgn0039665 | 404.089   | 252.558   | 555.620   | 2.200 | 1.137 | 0.000 | 0.006 |
| FBgn0033480 | 1142.506  | 713.878   | 1571.134  | 2.201 | 1.138 | 0.000 | 0.005 |
| FBgn0030915 | 464.371   | 290.071   | 638.670   | 2.202 | 1.139 | 0.000 | 0.001 |
| FBgn0263083 | 54.268    | 33.895    | 74.640    | 2.202 | 1.139 | 0.001 | 0.011 |
| FBgn0003462 | 12531.430 | 7808.292  | 17254.569 | 2.210 | 1.144 | 0.000 | 0.002 |
| FBgn0030272 | 16099.793 | 10003.525 | 22196.061 | 2.219 | 1.150 | 0.000 | 0.002 |
| FBgn0026878 | 171.769   | 106.707   | 236.832   | 2.219 | 1.150 | 0.000 | 0.003 |
| FBgn0026268 | 5752.192  | 3572.460  | 7931.924  | 2.220 | 1.151 | 0.001 | 0.013 |
| FBgn0036919 | 1513.308  | 938.831   | 2087.784  | 2.224 | 1.153 | 0.000 | 0.000 |
| FBgn0030310 | 557.664   | 345.895   | 769.432   | 2.224 | 1.153 | 0.000 | 0.001 |
| FBgn0260747 | 11866.031 | 7358.389  | 16373.672 | 2.225 | 1.154 | 0.000 | 0.002 |
| FBgn0036576 | 777.386   | 481.334   | 1073.438  | 2.230 | 1.157 | 0.001 | 0.010 |
| FBgn0002985 | 57.603    | 35.627    | 79.580    | 2.234 | 1.159 | 0.005 | 0.036 |
| FBgn0044030 | 535.829   | 331.313   | 740.345   | 2.235 | 1.160 | 0.001 | 0.009 |
| FBgn0010078 | 53904.433 | 33303.796 | 74505.069 | 2.237 | 1.162 | 0.000 | 0.003 |
| FBgn0040239 | 2323.085  | 1434.429  | 3211.741  | 2.239 | 1.163 | 0.007 | 0.045 |
| FBgn0000413 | 2476.983  | 1529.073  | 3424.893  | 2.240 | 1.163 | 0.002 | 0.021 |
| FBgn0028993 | 99.733    | 61.424    | 138.042   | 2.247 | 1.168 | 0.001 | 0.007 |
| FBgn0030239 | 1652.406  | 1016.630  | 2288.182  | 2.251 | 1.170 | 0.001 | 0.009 |
| FBgn0033949 | 438.516   | 269.358   | 607.675   | 2.256 | 1.174 | 0.000 | 0.001 |
| FBgn0016075 | 10663.732 | 6550.079  | 14777.384 | 2.256 | 1.174 | 0.000 | 0.000 |
| FBgn0003507 | 3727.919  | 2288.795  | 5167.044  | 2.258 | 1.175 | 0.000 | 0.000 |
| FBgn0034650 | 475.686   | 291.874   | 659.497   | 2.260 | 1.176 | 0.001 | 0.013 |
| FBgn0037164 | 476.962   | 292.642   | 661.282   | 2.260 | 1.176 | 0.000 | 0.006 |
| FBgn0264005 | 321.039   | 196.300   | 445.778   | 2.271 | 1.183 | 0.000 | 0.001 |
| FBgn0032285 | 70805.293 | 43183.524 | 98427.061 | 2.279 | 1.189 | 0.002 | 0.017 |
| FBgn0030995 | 100.171   | 61.046    | 139.296   | 2.282 | 1.190 | 0.000 | 0.006 |
| FBgn0031312 | 382.663   | 233.046   | 532.281   | 2.284 | 1.192 | 0.000 | 0.000 |
| FBgn0029823 | 5259.924  | 3202.511  | 7317.337  | 2.285 | 1.192 | 0.000 | 0.001 |
| FBgn0032299 | 151.994   | 92.454    | 211.534   | 2.288 | 1.194 | 0.000 | 0.006 |
| FBgn0037328 | 17035.924 | 10361.481 | 23710.368 | 2.288 | 1.194 | 0.002 | 0.018 |
| FBgn0033341 | 1088.687  | 662.065   | 1515.308  | 2.289 | 1.195 | 0.000 | 0.000 |
| FBgn0033122 | 690.291   | 418.958   | 961.625   | 2.295 | 1.199 | 0.000 | 0.005 |
| FBgn0032812 | 644.911   | 391.319   | 898.502   | 2.296 | 1.199 | 0.000 | 0.000 |

|             |           |           |           |       |       |       |       |
|-------------|-----------|-----------|-----------|-------|-------|-------|-------|
| FBgn0052667 | 6851.280  | 4156.545  | 9546.015  | 2.297 | 1.200 | 0.001 | 0.007 |
| FBgn0025629 | 481.699   | 291.718   | 671.681   | 2.302 | 1.203 | 0.000 | 0.000 |
| FBgn0031418 | 2685.433  | 1622.634  | 3748.231  | 2.310 | 1.208 | 0.000 | 0.000 |
| FBgn0023549 | 1081.547  | 653.097   | 1509.998  | 2.312 | 1.209 | 0.000 | 0.000 |
| FBgn0034139 | 155.438   | 93.816    | 217.060   | 2.314 | 1.210 | 0.000 | 0.005 |
| FBgn0032350 | 7899.993  | 4767.857  | 11032.128 | 2.314 | 1.210 | 0.000 | 0.006 |
| FBgn0039759 | 67.581    | 40.775    | 94.387    | 2.315 | 1.211 | 0.003 | 0.028 |
| FBgn0025558 | 1134.173  | 684.141   | 1584.205  | 2.316 | 1.211 | 0.000 | 0.000 |
| FBgn0250874 | 1571.302  | 946.972   | 2195.632  | 2.319 | 1.213 | 0.000 | 0.000 |
| FBgn0011746 | 704.903   | 424.672   | 985.133   | 2.320 | 1.214 | 0.000 | 0.000 |
| FBgn0038533 | 1329.117  | 800.274   | 1857.961  | 2.322 | 1.215 | 0.000 | 0.002 |
| FBgn0030326 | 81.731    | 49.192    | 114.270   | 2.323 | 1.216 | 0.002 | 0.016 |
| FBgn0034761 | 6977.372  | 4199.318  | 9755.426  | 2.323 | 1.216 | 0.000 | 0.000 |
| FBgn0085320 | 1827.673  | 1099.047  | 2556.299  | 2.326 | 1.218 | 0.001 | 0.011 |
| FBgn0030645 | 607.100   | 363.861   | 850.340   | 2.337 | 1.225 | 0.000 | 0.000 |
| FBgn0016660 | 39.687    | 23.776    | 55.597    | 2.338 | 1.225 | 0.006 | 0.042 |
| FBgn0037222 | 78.694    | 47.144    | 110.244   | 2.338 | 1.226 | 0.004 | 0.034 |
| FBgn0023130 | 717.617   | 429.897   | 1005.336  | 2.339 | 1.226 | 0.002 | 0.017 |
| FBgn0031097 | 815.719   | 488.001   | 1143.437  | 2.343 | 1.228 | 0.000 | 0.000 |
| FBgn0030362 | 5939.406  | 3551.523  | 8327.289  | 2.345 | 1.229 | 0.001 | 0.007 |
| FBgn0039407 | 102.302   | 61.172    | 143.433   | 2.345 | 1.229 | 0.000 | 0.004 |
| FBgn0052695 | 659.381   | 394.192   | 924.570   | 2.345 | 1.230 | 0.001 | 0.011 |
| FBgn0020653 | 7030.004  | 4193.176  | 9866.832  | 2.353 | 1.235 | 0.000 | 0.001 |
| FBgn0039118 | 643.917   | 383.729   | 904.104   | 2.356 | 1.236 | 0.000 | 0.000 |
| FBgn0014455 | 1496.234  | 891.578   | 2100.889  | 2.356 | 1.237 | 0.000 | 0.000 |
| FBgn0040398 | 17493.265 | 10397.556 | 24588.973 | 2.365 | 1.242 | 0.001 | 0.009 |
| FBgn0039820 | 55.733    | 33.048    | 78.419    | 2.373 | 1.247 | 0.003 | 0.023 |
| FBgn0033000 | 123.630   | 73.101    | 174.158   | 2.382 | 1.252 | 0.000 | 0.001 |
| FBgn0030251 | 10681.230 | 6303.945  | 15058.515 | 2.389 | 1.256 | 0.000 | 0.001 |
| FBgn0013689 | 14.285    | 8.428     | 20.142    | 2.390 | 1.257 | 0.000 | 0.003 |
| FBgn0030737 | 784.985   | 461.138   | 1108.833  | 2.405 | 1.266 | 0.000 | 0.000 |
| FBgn0003062 | 1457.987  | 855.264   | 2060.710  | 2.409 | 1.269 | 0.000 | 0.000 |
| FBgn0031817 | 1251.707  | 733.883   | 1769.530  | 2.411 | 1.270 | 0.000 | 0.000 |
| FBgn0033340 | 1664.584  | 972.209   | 2356.959  | 2.424 | 1.278 | 0.000 | 0.000 |

|             |            |            |            |       |       |       |       |
|-------------|------------|------------|------------|-------|-------|-------|-------|
| FBgn0030927 | 304.756    | 177.801    | 431.711    | 2.428 | 1.280 | 0.002 | 0.016 |
| FBgn0263402 | 47.488     | 27.696     | 67.280     | 2.429 | 1.281 | 0.001 | 0.011 |
| FBgn0039733 | 1275.666   | 742.461    | 1808.871   | 2.436 | 1.285 | 0.001 | 0.009 |
| FBgn0039827 | 525.073    | 305.455    | 744.691    | 2.438 | 1.286 | 0.000 | 0.000 |
| FBgn0046706 | 55.535     | 32.292     | 78.777     | 2.440 | 1.287 | 0.001 | 0.010 |
| FBgn0010385 | 342.626    | 199.204    | 486.048    | 2.440 | 1.287 | 0.000 | 0.000 |
| FBgn0085256 | 3144.317   | 1824.161   | 4464.473   | 2.447 | 1.291 | 0.002 | 0.016 |
| FBgn0039678 | 6713.005   | 3890.727   | 9535.283   | 2.451 | 1.293 | 0.000 | 0.005 |
| FBgn0031068 | 593.352    | 342.797    | 843.908    | 2.462 | 1.300 | 0.000 | 0.000 |
| FBgn0039159 | 572.059    | 330.425    | 813.693    | 2.463 | 1.300 | 0.000 | 0.000 |
| FBgn0020385 | 8837.277   | 5082.636   | 12591.917  | 2.477 | 1.309 | 0.000 | 0.000 |
| FBgn0026562 | 17232.261  | 9905.366   | 24559.156  | 2.479 | 1.310 | 0.000 | 0.000 |
| FBgn0039664 | 205.288    | 117.962    | 292.614    | 2.481 | 1.311 | 0.000 | 0.000 |
| FBgn0000358 | 125.863    | 72.295     | 179.431    | 2.482 | 1.311 | 0.003 | 0.026 |
| FBgn0001995 | 921.520    | 527.140    | 1315.900   | 2.496 | 1.320 | 0.003 | 0.023 |
| FBgn0024841 | 3904.243   | 2222.866   | 5585.620   | 2.513 | 1.329 | 0.000 | 0.000 |
| FBgn0262538 | 61.768     | 35.157     | 88.379     | 2.514 | 1.330 | 0.000 | 0.004 |
| FBgn0010638 | 1890.344   | 1072.999   | 2707.690   | 2.523 | 1.335 | 0.000 | 0.000 |
| FBgn0044810 | 140.044    | 79.371     | 200.716    | 2.529 | 1.338 | 0.007 | 0.048 |
| FBgn0044048 | 749.620    | 424.464    | 1074.775   | 2.532 | 1.340 | 0.000 | 0.003 |
| FBgn0005391 | 331064.518 | 186817.403 | 475311.633 | 2.544 | 1.347 | 0.000 | 0.004 |
| FBgn0051465 | 91.411     | 51.349     | 131.472    | 2.560 | 1.356 | 0.000 | 0.001 |
| FBgn0031148 | 1841.387   | 1034.366   | 2648.408   | 2.560 | 1.356 | 0.003 | 0.023 |
| FBgn0051313 | 6062.653   | 3402.279   | 8723.026   | 2.564 | 1.358 | 0.000 | 0.001 |
| FBgn0033879 | 9454.320   | 5302.928   | 13605.712  | 2.566 | 1.359 | 0.000 | 0.001 |
| FBgn0050269 | 330.640    | 185.153    | 476.127    | 2.572 | 1.363 | 0.000 | 0.000 |
| FBgn0035806 | 323.097    | 180.612    | 465.581    | 2.578 | 1.366 | 0.000 | 0.003 |
| FBgn0030160 | 22204.929  | 12393.211  | 32016.646  | 2.583 | 1.369 | 0.000 | 0.000 |
| FBgn0030292 | 7013.277   | 3912.644   | 10113.911  | 2.585 | 1.370 | 0.001 | 0.011 |
| FBgn0033566 | 601.230    | 334.904    | 867.556    | 2.590 | 1.373 | 0.000 | 0.000 |
| FBgn0053198 | 89.917     | 50.029     | 129.805    | 2.595 | 1.376 | 0.000 | 0.001 |
| FBgn0000299 | 16876.376  | 9385.104   | 24367.649  | 2.596 | 1.377 | 0.000 | 0.000 |
| FBgn0013949 | 5594.523   | 3110.247   | 8078.799   | 2.597 | 1.377 | 0.000 | 0.000 |
| FBgn0032293 | 945.491    | 524.017    | 1366.966   | 2.609 | 1.383 | 0.000 | 0.002 |

|             |           |           |           |       |       |       |       |
|-------------|-----------|-----------|-----------|-------|-------|-------|-------|
| FBgn0040007 | 528.482   | 292.033   | 764.931   | 2.619 | 1.389 | 0.000 | 0.000 |
| FBgn0025640 | 1775.467  | 981.067   | 2569.866  | 2.619 | 1.389 | 0.000 | 0.001 |
| FBgn0003117 | 190.354   | 105.112   | 275.596   | 2.622 | 1.391 | 0.000 | 0.000 |
| FBgn0033777 | 1120.640  | 618.575   | 1622.705  | 2.623 | 1.391 | 0.000 | 0.000 |
| FBgn0033140 | 48.387    | 26.685    | 70.089    | 2.627 | 1.393 | 0.001 | 0.009 |
| FBgn0052174 | 23.282    | 12.813    | 33.751    | 2.634 | 1.397 | 0.006 | 0.043 |
| FBgn0037715 | 4484.084  | 2467.368  | 6500.799  | 2.635 | 1.398 | 0.000 | 0.001 |
| FBgn0031049 | 2252.540  | 1235.988  | 3269.091  | 2.645 | 1.403 | 0.001 | 0.011 |
| FBgn0000078 | 527.964   | 288.988   | 766.939   | 2.654 | 1.408 | 0.000 | 0.000 |
| FBgn0041709 | 134.235   | 72.860    | 195.609   | 2.685 | 1.425 | 0.000 | 0.001 |
| FBgn0261068 | 543.342   | 293.789   | 792.896   | 2.699 | 1.432 | 0.000 | 0.000 |
| FBgn0030786 | 2925.160  | 1581.622  | 4268.698  | 2.699 | 1.432 | 0.000 | 0.002 |
| FBgn0032191 | 3812.797  | 2061.557  | 5564.036  | 2.699 | 1.432 | 0.000 | 0.000 |
| FBgn0004959 | 50.249    | 27.155    | 73.343    | 2.701 | 1.433 | 0.003 | 0.025 |
| FBgn0030482 | 2815.779  | 1521.109  | 4110.450  | 2.702 | 1.434 | 0.000 | 0.000 |
| FBgn0030120 | 41.948    | 22.643    | 61.253    | 2.705 | 1.436 | 0.004 | 0.030 |
| FBgn0035181 | 2356.567  | 1271.810  | 3441.325  | 2.706 | 1.436 | 0.000 | 0.001 |
| FBgn0030060 | 1844.086  | 994.783   | 2693.389  | 2.708 | 1.437 | 0.000 | 0.000 |
| FBgn0027334 | 879.372   | 473.775   | 1284.968  | 2.712 | 1.439 | 0.000 | 0.000 |
| FBgn0023535 | 114.827   | 61.676    | 167.977   | 2.724 | 1.445 | 0.000 | 0.000 |
| FBgn0030270 | 212.574   | 113.417   | 311.731   | 2.749 | 1.459 | 0.000 | 0.000 |
| FBgn0085249 | 450.549   | 239.261   | 661.837   | 2.766 | 1.468 | 0.000 | 0.002 |
| FBgn0050181 | 34.138    | 18.125    | 50.151    | 2.767 | 1.468 | 0.002 | 0.016 |
| FBgn0031702 | 3555.672  | 1881.094  | 5230.250  | 2.780 | 1.475 | 0.000 | 0.000 |
| FBgn0040793 | 46931.477 | 24793.529 | 69069.424 | 2.786 | 1.478 | 0.001 | 0.013 |
| FBgn0085485 | 205.374   | 108.211   | 302.537   | 2.796 | 1.483 | 0.001 | 0.013 |
| FBgn0045823 | 27292.919 | 14339.287 | 40246.551 | 2.807 | 1.489 | 0.004 | 0.029 |
| FBgn0053926 | 5218.113  | 2730.787  | 7705.439  | 2.822 | 1.497 | 0.000 | 0.000 |
| FBgn0037906 | 571.633   | 296.457   | 846.810   | 2.856 | 1.514 | 0.000 | 0.000 |
| FBgn0030955 | 606.736   | 313.399   | 900.073   | 2.872 | 1.522 | 0.000 | 0.005 |
| FBgn0054003 | 664.513   | 342.689   | 986.338   | 2.878 | 1.525 | 0.000 | 0.000 |
| FBgn0051715 | 41.659    | 21.374    | 61.945    | 2.898 | 1.535 | 0.001 | 0.008 |
| FBgn0034879 | 495.718   | 251.940   | 739.497   | 2.935 | 1.553 | 0.000 | 0.000 |
| FBgn0011824 | 1238.141  | 622.607   | 1853.676  | 2.977 | 1.574 | 0.000 | 0.001 |

|             |          |          |           |       |       |       |       |
|-------------|----------|----------|-----------|-------|-------|-------|-------|
| FBgn0085483 | 35.459   | 17.829   | 53.090    | 2.978 | 1.574 | 0.000 | 0.004 |
| FBgn0052817 | 33.446   | 16.740   | 50.151    | 2.996 | 1.583 | 0.007 | 0.045 |
| FBgn0003060 | 222.954  | 111.331  | 334.577   | 3.005 | 1.587 | 0.001 | 0.010 |
| FBgn0031313 | 4996.562 | 2490.536 | 7502.588  | 3.012 | 1.591 | 0.000 | 0.000 |
| FBgn0003888 | 657.814  | 318.843  | 996.784   | 3.126 | 1.644 | 0.000 | 0.002 |
| FBgn0262838 | 30.450   | 14.249   | 46.650    | 3.274 | 1.711 | 0.001 | 0.012 |
| FBgn0033367 | 4868.901 | 2229.163 | 7508.640  | 3.368 | 1.752 | 0.000 | 0.001 |
| FBgn0037167 | 1266.345 | 575.819  | 1956.872  | 3.398 | 1.765 | 0.000 | 0.002 |
| FBgn0052368 | 255.912  | 115.704  | 396.121   | 3.424 | 1.776 | 0.000 | 0.000 |
| FBgn0034328 | 1265.543 | 570.986  | 1960.101  | 3.433 | 1.779 | 0.000 | 0.004 |
| FBgn0037999 | 718.573  | 324.011  | 1113.135  | 3.435 | 1.781 | 0.000 | 0.000 |
| FBgn0013672 | 44.844   | 20.142   | 69.546    | 3.453 | 1.788 | 0.000 | 0.000 |
| FBgn0010222 | 5793.918 | 2600.023 | 8987.813  | 3.457 | 1.789 | 0.000 | 0.000 |
| FBgn0035189 | 1141.771 | 511.568  | 1771.974  | 3.464 | 1.792 | 0.000 | 0.000 |
| FBgn0085411 | 47.820   | 21.211   | 74.430    | 3.509 | 1.811 | 0.001 | 0.007 |
| FBgn0040735 | 139.516  | 61.454   | 217.578   | 3.540 | 1.824 | 0.000 | 0.000 |
| FBgn0036607 | 92.124   | 40.557   | 143.692   | 3.543 | 1.825 | 0.003 | 0.022 |
| FBgn0040733 | 547.063  | 240.384  | 853.743   | 3.552 | 1.828 | 0.000 | 0.000 |
| FBgn0039027 | 113.609  | 49.336   | 177.882   | 3.606 | 1.850 | 0.000 | 0.000 |
| FBgn0033307 | 228.950  | 99.402   | 358.499   | 3.607 | 1.851 | 0.000 | 0.001 |
| FBgn0262886 | 16.547   | 7.165    | 25.928    | 3.618 | 1.855 | 0.002 | 0.022 |
| FBgn0034201 | 23.719   | 10.241   | 37.197    | 3.632 | 1.861 | 0.001 | 0.010 |
| FBgn0031261 | 1854.494 | 797.425  | 2911.564  | 3.651 | 1.868 | 0.000 | 0.000 |
| FBgn0014033 | 978.169  | 420.546  | 1535.791  | 3.652 | 1.869 | 0.000 | 0.000 |
| FBgn0039031 | 8320.553 | 3576.538 | 13064.568 | 3.653 | 1.869 | 0.001 | 0.007 |
| FBgn0031040 | 1028.475 | 441.762  | 1615.188  | 3.656 | 1.870 | 0.000 | 0.000 |
| FBgn0030653 | 65.780   | 27.947   | 103.612   | 3.707 | 1.890 | 0.000 | 0.002 |
| FBgn0032281 | 270.547  | 114.562  | 426.531   | 3.723 | 1.897 | 0.000 | 0.000 |
| FBgn0259936 | 12.257   | 5.100    | 19.413    | 3.806 | 1.928 | 0.001 | 0.012 |
| FBgn0085195 | 2801.648 | 1153.027 | 4450.268  | 3.860 | 1.948 | 0.000 | 0.000 |
| FBgn0010381 | 2892.685 | 1190.347 | 4595.022  | 3.860 | 1.949 | 0.000 | 0.001 |
| FBgn0002531 | 64.675   | 26.348   | 103.001   | 3.909 | 1.967 | 0.000 | 0.000 |
| FBgn0040349 | 862.912  | 350.294  | 1375.530  | 3.927 | 1.973 | 0.000 | 0.002 |
| FBgn0051922 | 15.777   | 6.281    | 25.273    | 4.024 | 2.009 | 0.004 | 0.031 |

|             |          |         |          |       |         |       |       |
|-------------|----------|---------|----------|-------|---------|-------|-------|
| FBgn0053217 | 15.507   | 6.155   | 24.859   | 4.039 | 2.014   | 0.003 | 0.027 |
| FBgn0261989 | 54.270   | 20.408  | 88.132   | 4.319 | 2.111   | 0.000 | 0.000 |
| FBgn0040907 | 224.007  | 82.563  | 365.451  | 4.426 | 2.146   | 0.000 | 0.000 |
| FBgn0040734 | 83.911   | 30.738  | 137.085  | 4.460 | 2.157   | 0.000 | 0.000 |
| FBgn0262142 | 11.129   | 4.005   | 18.253   | 4.558 | 2.188   | 0.003 | 0.026 |
| FBgn0038530 | 492.230  | 168.587 | 815.872  | 4.839 | 2.275   | 0.000 | 0.000 |
| FBgn0053192 | 219.030  | 73.363  | 364.697  | 4.971 | 2.314   | 0.000 | 0.000 |
| FBgn0262146 | 147.653  | 47.464  | 247.842  | 5.222 | 2.385   | 0.000 | 0.000 |
| FBgn0062961 | 30.848   | 9.823   | 51.874   | 5.281 | 2.401   | 0.000 | 0.000 |
| FBgn0261628 | 14.634   | 4.427   | 24.841   | 5.612 | 2.488   | 0.003 | 0.023 |
| FBgn0004431 | 1587.883 | 463.799 | 2711.967 | 5.847 | 2.548   | 0.000 | 0.001 |
| FBgn0031674 | 8.117    | 16.233  | 0.000    | 0.000 | #DIV/0! | 0.000 | 0.001 |
| FBgn0034372 | 4.280    | 8.561   | 0.000    | 0.000 | #DIV/0! | 0.007 | 0.045 |
| FBgn0038054 | 5.987    | 11.973  | 0.000    | 0.000 | #DIV/0! | 0.001 | 0.010 |
| FBgn0038484 | 6.492    | 12.984  | 0.000    | 0.000 | #DIV/0! | 0.001 | 0.007 |
| FBgn0050053 | 7.717    | 15.434  | 0.000    | 0.000 | #DIV/0! | 0.000 | 0.002 |
| FBgn0262607 | 6.031    | 12.062  | 0.000    | 0.000 | #DIV/0! | 0.001 | 0.012 |



**Table S2.2: Genes with altered expression in 10d Spd<sup>5mM+</sup> as compared to Spd<sup>-</sup> flies.**

| <b>id</b>   | <b>baseMean</b> | <b>baseMeanA</b> | <b>baseMeanB</b> | <b>foldChange</b> | <b>log2FoldChange</b> | <b>p-value</b> | <b>padj</b> |
|-------------|-----------------|------------------|------------------|-------------------|-----------------------|----------------|-------------|
| FBgn0000182 | 91.541          | 182.518          | 0.565            | 0.003             | -8.335                | 0.000          | 0.000       |
| FBgn0000277 | 304.436         | 606.412          | 2.460            | 0.004             | -7.945                | 0.000          | 0.001       |
| FBgn0264353 | 60.566          | 120.499          | 0.632            | 0.005             | -7.576                | 0.000          | 0.000       |
| FBgn0263650 | 55.502          | 110.372          | 0.632            | 0.006             | -7.449                | 0.000          | 0.000       |
| FBgn0261987 | 44.948          | 89.331           | 0.565            | 0.006             | -7.304                | 0.000          | 0.000       |
| FBgn0262881 | 882.425         | 1753.512         | 11.338           | 0.006             | -7.273                | 0.000          | 0.000       |
| FBgn0035159 | 42.932          | 85.300           | 0.565            | 0.007             | -7.237                | 0.000          | 0.000       |
| FBgn0085209 | 608.755         | 1208.632         | 8.877            | 0.007             | -7.089                | 0.000          | 0.000       |
| FBgn0034199 | 3080.616        | 6111.793         | 49.440           | 0.008             | -6.950                | 0.000          | 0.000       |
| FBgn0031610 | 38.864          | 77.096           | 0.632            | 0.008             | -6.931                | 0.000          | 0.000       |
| FBgn0011761 | 133.500         | 264.739          | 2.261            | 0.009             | -6.871                | 0.000          | 0.000       |
| FBgn0085334 | 169.006         | 334.920          | 3.092            | 0.009             | -6.759                | 0.000          | 0.000       |
| FBgn0085271 | 806.430         | 1595.272         | 17.587           | 0.011             | -6.503                | 0.000          | 0.000       |
| FBgn0034329 | 9598.768        | 18938.905        | 258.631          | 0.014             | -6.194                | 0.000          | 0.000       |
| FBgn0033523 | 243.864         | 480.547          | 7.181            | 0.015             | -6.064                | 0.000          | 0.000       |
| FBgn0050172 | 1824.416        | 3591.678         | 57.155           | 0.016             | -5.974                | 0.000          | 0.000       |
| FBgn0011227 | 3645.346        | 7173.628         | 117.064          | 0.016             | -5.937                | 0.000          | 0.000       |
| FBgn0085203 | 36.249          | 71.301           | 1.197            | 0.017             | -5.897                | 0.000          | 0.000       |
| FBgn0063494 | 1080.117        | 2121.134         | 39.100           | 0.018             | -5.762                | 0.000          | 0.000       |
| FBgn0032244 | 32.551          | 63.905           | 1.197            | 0.019             | -5.739                | 0.000          | 0.000       |
| FBgn0264393 | 93.522          | 183.586          | 3.458            | 0.019             | -5.730                | 0.000          | 0.001       |
| FBgn0033357 | 2863.565        | 5612.226         | 114.904          | 0.020             | -5.610                | 0.000          | 0.000       |
| FBgn0004106 | 15.068          | 29.505           | 0.632            | 0.021             | -5.546                | 0.000          | 0.000       |
| FBgn0066084 | 63490.475       | 124284.216       | 2696.733         | 0.022             | -5.526                | 0.000          | 0.000       |
| FBgn0010039 | 439.063         | 859.041          | 19.084           | 0.022             | -5.492                | 0.000          | 0.000       |
| FBgn0023395 | 14.475          | 28.318           | 0.632            | 0.022             | -5.487                | 0.000          | 0.000       |
| FBgn0032847 | 335.619         | 656.442          | 14.796           | 0.023             | -5.471                | 0.000          | 0.000       |
| FBgn0000276 | 1500.866        | 2932.602         | 69.130           | 0.024             | -5.407                | 0.000          | 0.001       |
| FBgn0264350 | 12.236          | 23.907           | 0.565            | 0.024             | -5.402                | 0.000          | 0.001       |
| FBgn0022224 | 327.122         | 638.949          | 15.295           | 0.024             | -5.385                | 0.000          | 0.000       |

|             |           |           |         |       |        |       |       |
|-------------|-----------|-----------|---------|-------|--------|-------|-------|
| FBgn0085284 | 227.483   | 444.327   | 10.640  | 0.024 | -5.384 | 0.000 | 0.000 |
| FBgn0085279 | 323.419   | 631.579   | 15.260  | 0.024 | -5.371 | 0.000 | 0.000 |
| FBgn0032929 | 11.883    | 23.200    | 0.565   | 0.024 | -5.359 | 0.000 | 0.000 |
| FBgn0034627 | 26.277    | 51.291    | 1.263   | 0.025 | -5.343 | 0.000 | 0.000 |
| FBgn0053307 | 1187.880  | 2317.478  | 58.282  | 0.025 | -5.313 | 0.000 | 0.000 |
| FBgn0004649 | 58.581    | 114.269   | 2.893   | 0.025 | -5.304 | 0.000 | 0.000 |
| FBgn0262481 | 291.665   | 568.835   | 14.496  | 0.025 | -5.294 | 0.000 | 0.000 |
| FBgn0029942 | 454.817   | 886.924   | 22.710  | 0.026 | -5.287 | 0.000 | 0.000 |
| FBgn0036255 | 188.277   | 367.112   | 9.443   | 0.026 | -5.281 | 0.000 | 0.000 |
| FBgn0039355 | 22.349    | 43.567    | 1.131   | 0.026 | -5.268 | 0.000 | 0.000 |
| FBgn0035355 | 72.204    | 140.752   | 3.657   | 0.026 | -5.266 | 0.000 | 0.000 |
| FBgn0067905 | 2824.534  | 5505.774  | 143.295 | 0.026 | -5.264 | 0.000 | 0.000 |
| FBgn0034187 | 21.947    | 42.763    | 1.131   | 0.026 | -5.241 | 0.000 | 0.000 |
| FBgn0036145 | 2859.181  | 5567.554  | 150.808 | 0.027 | -5.206 | 0.000 | 0.000 |
| FBgn0034326 | 21.320    | 41.509    | 1.131   | 0.027 | -5.198 | 0.000 | 0.000 |
| FBgn0031561 | 15598.177 | 30356.991 | 839.362 | 0.028 | -5.177 | 0.000 | 0.000 |
| FBgn0030085 | 20.724    | 40.318    | 1.131   | 0.028 | -5.156 | 0.000 | 0.000 |
| FBgn0026417 | 21.820    | 42.443    | 1.197   | 0.028 | -5.148 | 0.000 | 0.000 |
| FBgn0034299 | 44.669    | 86.878    | 2.460   | 0.028 | -5.142 | 0.000 | 0.000 |
| FBgn0260477 | 9.936     | 19.307    | 0.565   | 0.029 | -5.094 | 0.000 | 0.001 |
| FBgn0263981 | 11.095    | 21.558    | 0.632   | 0.029 | -5.093 | 0.000 | 0.001 |
| FBgn0034512 | 11484.731 | 22314.278 | 655.184 | 0.029 | -5.090 | 0.000 | 0.000 |
| FBgn0050053 | 9.791     | 19.016    | 0.565   | 0.030 | -5.072 | 0.000 | 0.001 |
| FBgn0032494 | 2784.955  | 5408.891  | 161.018 | 0.030 | -5.070 | 0.000 | 0.000 |
| FBgn0037009 | 342.895   | 665.874   | 19.915  | 0.030 | -5.063 | 0.000 | 0.000 |
| FBgn0085322 | 389.609   | 756.577   | 22.640  | 0.030 | -5.063 | 0.000 | 0.000 |
| FBgn0036777 | 19.436    | 37.742    | 1.131   | 0.030 | -5.061 | 0.000 | 0.000 |
| FBgn0034165 | 122.440   | 237.698   | 7.181   | 0.030 | -5.049 | 0.000 | 0.000 |
| FBgn0085229 | 3214.949  | 6241.117  | 188.781 | 0.030 | -5.047 | 0.000 | 0.000 |
| FBgn0033547 | 386.160   | 749.379   | 22.940  | 0.031 | -5.030 | 0.000 | 0.000 |
| FBgn0040972 | 772.547   | 1498.746  | 46.348  | 0.031 | -5.015 | 0.000 | 0.000 |
| FBgn0033548 | 384.429   | 745.650   | 23.209  | 0.031 | -5.006 | 0.000 | 0.000 |
| FBgn0031674 | 9.260     | 17.955    | 0.565   | 0.031 | -4.989 | 0.000 | 0.001 |
| FBgn0034945 | 117.033   | 226.885   | 7.181   | 0.032 | -4.982 | 0.000 | 0.000 |

|             |          |           |         |       |        |       |       |
|-------------|----------|-----------|---------|-------|--------|-------|-------|
| FBgn0039835 | 161.178  | 312.348   | 10.008  | 0.032 | -4.964 | 0.000 | 0.000 |
| FBgn0262539 | 684.520  | 1326.384  | 42.656  | 0.032 | -4.959 | 0.000 | 0.000 |
| FBgn0038420 | 951.351  | 1843.353  | 59.350  | 0.032 | -4.957 | 0.000 | 0.000 |
| FBgn0050197 | 5726.772 | 11086.923 | 366.622 | 0.033 | -4.918 | 0.000 | 0.000 |
| FBgn0031753 | 256.283  | 496.109   | 16.457  | 0.033 | -4.914 | 0.000 | 0.000 |
| FBgn0023170 | 3421.142 | 6620.292  | 221.991 | 0.034 | -4.898 | 0.000 | 0.000 |
| FBgn0085468 | 1473.435 | 2851.082  | 95.788  | 0.034 | -4.896 | 0.000 | 0.000 |
| FBgn0037345 | 73.927   | 143.000   | 4.854   | 0.034 | -4.881 | 0.000 | 0.000 |
| FBgn0039218 | 576.881  | 1115.758  | 38.004  | 0.034 | -4.876 | 0.000 | 0.000 |
| FBgn0031560 | 1132.727 | 2190.649  | 74.806  | 0.034 | -4.872 | 0.000 | 0.000 |
| FBgn0052450 | 8.520    | 16.474    | 0.565   | 0.034 | -4.865 | 0.001 | 0.003 |
| FBgn0039083 | 9.519    | 18.406    | 0.632   | 0.034 | -4.865 | 0.000 | 0.000 |
| FBgn0051189 | 73.636   | 142.352   | 4.920   | 0.035 | -4.855 | 0.000 | 0.000 |
| FBgn0031564 | 53.763   | 103.869   | 3.657   | 0.035 | -4.828 | 0.000 | 0.000 |
| FBgn0002899 | 24.837   | 47.978    | 1.696   | 0.035 | -4.822 | 0.000 | 0.000 |
| FBgn0259831 | 18.425   | 35.587    | 1.263   | 0.035 | -4.816 | 0.000 | 0.000 |
| FBgn0040588 | 303.431  | 585.950   | 20.913  | 0.036 | -4.808 | 0.000 | 0.000 |
| FBgn0037008 | 128.849  | 248.622   | 9.076   | 0.037 | -4.776 | 0.000 | 0.000 |
| FBgn0037708 | 107.708  | 207.802   | 7.614   | 0.037 | -4.770 | 0.000 | 0.000 |
| FBgn0034245 | 6839.928 | 13195.793 | 484.063 | 0.037 | -4.769 | 0.000 | 0.000 |
| FBgn0036532 | 7.892    | 15.220    | 0.565   | 0.037 | -4.751 | 0.004 | 0.015 |
| FBgn0038665 | 1529.656 | 2949.559  | 109.753 | 0.037 | -4.748 | 0.000 | 0.000 |
| FBgn0035674 | 185.157  | 356.980   | 13.333  | 0.037 | -4.743 | 0.000 | 0.000 |
| FBgn0042137 | 8.730    | 16.828    | 0.632   | 0.038 | -4.736 | 0.001 | 0.004 |
| FBgn0000278 | 49.576   | 95.561    | 3.591   | 0.038 | -4.734 | 0.000 | 0.000 |
| FBgn0262003 | 269.975  | 520.366   | 19.583  | 0.038 | -4.732 | 0.000 | 0.000 |
| FBgn0035998 | 154.721  | 298.171   | 11.271  | 0.038 | -4.725 | 0.000 | 0.000 |
| FBgn0040786 | 328.346  | 632.721   | 23.970  | 0.038 | -4.722 | 0.000 | 0.000 |
| FBgn0085244 | 363.754  | 700.843   | 26.664  | 0.038 | -4.716 | 0.000 | 0.000 |
| FBgn0033962 | 260.685  | 502.250   | 19.119  | 0.038 | -4.715 | 0.000 | 0.000 |
| FBgn0027073 | 439.423  | 846.296   | 32.550  | 0.038 | -4.700 | 0.000 | 0.000 |
| FBgn0030711 | 453.336  | 872.894   | 33.779  | 0.039 | -4.692 | 0.000 | 0.000 |
| FBgn0031403 | 90.862   | 174.909   | 6.815   | 0.039 | -4.682 | 0.000 | 0.000 |
| FBgn0032205 | 154.384  | 297.099   | 11.669  | 0.039 | -4.670 | 0.000 | 0.000 |

|             |           |           |          |       |        |       |       |
|-------------|-----------|-----------|----------|-------|--------|-------|-------|
| FBgn0037661 | 16.447    | 31.630    | 1.263    | 0.040 | -4.646 | 0.000 | 0.000 |
| FBgn0031361 | 174.244   | 335.057   | 13.431   | 0.040 | -4.641 | 0.000 | 0.000 |
| FBgn0033778 | 7.314     | 14.062    | 0.565    | 0.040 | -4.637 | 0.001 | 0.004 |
| FBgn0034523 | 14.531    | 27.931    | 1.131    | 0.040 | -4.627 | 0.000 | 0.000 |
| FBgn0050279 | 7.249     | 13.932    | 0.565    | 0.041 | -4.623 | 0.005 | 0.020 |
| FBgn0034264 | 38.421    | 73.817    | 3.025    | 0.041 | -4.609 | 0.000 | 0.000 |
| FBgn0038395 | 31.074    | 59.688    | 2.460    | 0.041 | -4.601 | 0.000 | 0.000 |
| FBgn0085339 | 161.385   | 309.970   | 12.800   | 0.041 | -4.598 | 0.000 | 0.000 |
| FBgn0000500 | 1427.460  | 2740.949  | 113.972  | 0.042 | -4.588 | 0.000 | 0.000 |
| FBgn0025583 | 14380.395 | 27610.714 | 1150.076 | 0.042 | -4.585 | 0.000 | 0.000 |
| FBgn0052068 | 1572.344  | 3018.683  | 126.005  | 0.042 | -4.582 | 0.000 | 0.000 |
| FBgn0033134 | 904.072   | 1735.632  | 72.513   | 0.042 | -4.581 | 0.000 | 0.000 |
| FBgn0038083 | 85.720    | 164.525   | 6.916    | 0.042 | -4.572 | 0.000 | 0.000 |
| FBgn0030694 | 211.311   | 405.565   | 17.057   | 0.042 | -4.572 | 0.000 | 0.000 |
| FBgn0263852 | 327.224   | 627.984   | 26.465   | 0.042 | -4.569 | 0.000 | 0.000 |
| FBgn0039313 | 70.496    | 135.273   | 5.719    | 0.042 | -4.564 | 0.000 | 0.000 |
| FBgn0262035 | 635.177   | 1218.820  | 51.534   | 0.042 | -4.564 | 0.000 | 0.000 |
| FBgn0032973 | 75.314    | 144.511   | 6.117    | 0.042 | -4.562 | 0.000 | 0.000 |
| FBgn0053108 | 205.918   | 394.748   | 17.088   | 0.043 | -4.530 | 0.000 | 0.000 |
| FBgn0033686 | 71.157    | 136.397   | 5.918    | 0.043 | -4.526 | 0.000 | 0.000 |
| FBgn0037762 | 15.144    | 29.025    | 1.263    | 0.044 | -4.522 | 0.000 | 0.000 |
| FBgn0033555 | 3198.780  | 6128.013  | 269.548  | 0.044 | -4.507 | 0.000 | 0.000 |
| FBgn0259791 | 7.492     | 14.352    | 0.632    | 0.044 | -4.506 | 0.015 | 0.047 |
| FBgn0032193 | 274.524   | 525.808   | 23.240   | 0.044 | -4.500 | 0.000 | 0.000 |
| FBgn0030684 | 6.670     | 12.774    | 0.565    | 0.044 | -4.498 | 0.002 | 0.010 |
| FBgn0034774 | 6.670     | 12.774    | 0.565    | 0.044 | -4.498 | 0.002 | 0.009 |
| FBgn0037646 | 205.656   | 393.822   | 17.489   | 0.044 | -4.493 | 0.000 | 0.000 |
| FBgn0031558 | 859.808   | 1646.204  | 73.413   | 0.045 | -4.487 | 0.000 | 0.000 |
| FBgn0040512 | 837.574   | 1603.068  | 72.080   | 0.045 | -4.475 | 0.000 | 0.000 |
| FBgn0036820 | 1083.240  | 2073.053  | 93.426   | 0.045 | -4.472 | 0.000 | 0.000 |
| FBgn0033683 | 402.366   | 769.986   | 34.745   | 0.045 | -4.470 | 0.000 | 0.000 |
| FBgn0036667 | 160.523   | 307.115   | 13.930   | 0.045 | -4.462 | 0.000 | 0.000 |
| FBgn0036509 | 591.921   | 1132.173  | 51.669   | 0.046 | -4.454 | 0.000 | 0.000 |
| FBgn0050033 | 701.015   | 1340.753  | 61.276   | 0.046 | -4.452 | 0.000 | 0.000 |

|             |          |          |         |       |        |       |       |
|-------------|----------|----------|---------|-------|--------|-------|-------|
| FBgn0034027 | 201.147  | 384.672  | 17.622  | 0.046 | -4.448 | 0.000 | 0.000 |
| FBgn0038919 | 40.184   | 76.843   | 3.524   | 0.046 | -4.446 | 0.000 | 0.000 |
| FBgn0053170 | 946.206  | 1808.928 | 83.484  | 0.046 | -4.437 | 0.000 | 0.000 |
| FBgn0037309 | 181.463  | 346.867  | 16.059  | 0.046 | -4.433 | 0.000 | 0.000 |
| FBgn0036696 | 59.389   | 113.491  | 5.287   | 0.047 | -4.424 | 0.000 | 0.000 |
| FBgn0029950 | 274.000  | 523.563  | 24.437  | 0.047 | -4.421 | 0.000 | 0.000 |
| FBgn0039172 | 1111.523 | 2123.830 | 99.217  | 0.047 | -4.420 | 0.000 | 0.000 |
| FBgn0031925 | 33.077   | 63.194   | 2.959   | 0.047 | -4.417 | 0.000 | 0.000 |
| FBgn0061198 | 829.155  | 1584.069 | 74.240  | 0.047 | -4.415 | 0.000 | 0.000 |
| FBgn0036536 | 32.982   | 63.004   | 2.959   | 0.047 | -4.412 | 0.000 | 0.000 |
| FBgn0000140 | 31.257   | 59.688   | 2.826   | 0.047 | -4.400 | 0.000 | 0.000 |
| FBgn0031873 | 262.641  | 501.476  | 23.806  | 0.047 | -4.397 | 0.000 | 0.000 |
| FBgn0016053 | 12.407   | 23.684   | 1.131   | 0.048 | -4.389 | 0.000 | 0.002 |
| FBgn0035907 | 121.831  | 232.524  | 11.139  | 0.048 | -4.384 | 0.000 | 0.000 |
| FBgn0031563 | 516.388  | 984.933  | 47.842  | 0.049 | -4.364 | 0.000 | 0.000 |
| FBgn0028380 | 339.515  | 647.513  | 31.518  | 0.049 | -4.361 | 0.000 | 0.000 |
| FBgn0262537 | 343.578  | 655.206  | 31.950  | 0.049 | -4.358 | 0.000 | 0.000 |
| FBgn0042206 | 82.129   | 156.578  | 7.680   | 0.049 | -4.350 | 0.000 | 0.000 |
| FBgn0032725 | 705.034  | 1343.802 | 66.266  | 0.049 | -4.342 | 0.000 | 0.000 |
| FBgn0263606 | 31.872   | 60.719   | 3.025   | 0.050 | -4.327 | 0.000 | 0.000 |
| FBgn0028664 | 482.305  | 918.828  | 45.783  | 0.050 | -4.327 | 0.000 | 0.000 |
| FBgn0013771 | 311.321  | 593.051  | 29.591  | 0.050 | -4.325 | 0.000 | 0.000 |
| FBgn0039108 | 11.892   | 22.653   | 1.131   | 0.050 | -4.325 | 0.000 | 0.000 |
| FBgn0035805 | 246.854  | 470.136  | 23.572  | 0.050 | -4.318 | 0.000 | 0.000 |
| FBgn0264675 | 6.575    | 12.517   | 0.632   | 0.050 | -4.309 | 0.015 | 0.047 |
| FBgn0261638 | 5.866    | 11.166   | 0.565   | 0.051 | -4.304 | 0.013 | 0.043 |
| FBgn0032192 | 5.849    | 11.133   | 0.565   | 0.051 | -4.300 | 0.003 | 0.014 |
| FBgn0022246 | 141.672  | 269.645  | 13.700  | 0.051 | -4.299 | 0.000 | 0.000 |
| FBgn0032836 | 3845.616 | 7319.072 | 372.160 | 0.051 | -4.298 | 0.000 | 0.000 |
| FBgn0037305 | 491.127  | 934.476  | 47.779  | 0.051 | -4.290 | 0.000 | 0.000 |
| FBgn0053178 | 1724.442 | 3280.941 | 167.943 | 0.051 | -4.288 | 0.000 | 0.000 |
| FBgn0039335 | 151.781  | 288.732  | 14.830  | 0.051 | -4.283 | 0.000 | 0.000 |
| FBgn0038001 | 6.446    | 12.261   | 0.632   | 0.052 | -4.279 | 0.003 | 0.013 |
| FBgn0027864 | 94.890   | 180.470  | 9.310   | 0.052 | -4.277 | 0.000 | 0.000 |

|             |         |         |        |       |        |       |       |
|-------------|---------|---------|--------|-------|--------|-------|-------|
| FBgn0004107 | 152.889 | 290.682 | 15.096 | 0.052 | -4.267 | 0.000 | 0.000 |
| FBgn0263604 | 371.316 | 705.960 | 36.672 | 0.052 | -4.267 | 0.000 | 0.000 |
| FBgn0038902 | 11.393  | 21.655  | 1.131  | 0.052 | -4.260 | 0.000 | 0.001 |
| FBgn0000405 | 172.897 | 328.573 | 17.221 | 0.052 | -4.254 | 0.000 | 0.000 |
| FBgn0026190 | 37.240  | 70.757  | 3.723  | 0.053 | -4.248 | 0.000 | 0.000 |
| FBgn0040255 | 12.617  | 23.970  | 1.263  | 0.053 | -4.246 | 0.000 | 0.000 |
| FBgn0032746 | 455.103 | 864.389 | 45.817 | 0.053 | -4.238 | 0.000 | 0.000 |
| FBgn0032791 | 42.591  | 80.893  | 4.289  | 0.053 | -4.237 | 0.000 | 0.000 |
| FBgn0026570 | 160.663 | 305.135 | 16.192 | 0.053 | -4.236 | 0.000 | 0.000 |
| FBgn0051248 | 504.338 | 957.707 | 50.968 | 0.053 | -4.232 | 0.000 | 0.000 |
| FBgn0037670 | 94.624  | 179.674 | 9.575  | 0.053 | -4.230 | 0.000 | 0.000 |
| FBgn0034888 | 179.279 | 340.406 | 18.153 | 0.053 | -4.229 | 0.000 | 0.000 |
| FBgn0039356 | 45.832  | 87.008  | 4.655  | 0.054 | -4.224 | 0.000 | 0.000 |
| FBgn0036192 | 64.671  | 122.725 | 6.616  | 0.054 | -4.213 | 0.000 | 0.000 |
| FBgn0034963 | 368.294 | 698.751 | 37.837 | 0.054 | -4.207 | 0.000 | 0.000 |
| FBgn0044050 | 327.223 | 620.762 | 33.684 | 0.054 | -4.204 | 0.000 | 0.000 |
| FBgn0036359 | 334.618 | 634.556 | 34.679 | 0.055 | -4.194 | 0.000 | 0.000 |
| FBgn0086447 | 170.810 | 323.831 | 17.789 | 0.055 | -4.186 | 0.000 | 0.000 |
| FBgn0027074 | 51.892  | 98.364  | 5.419  | 0.055 | -4.182 | 0.000 | 0.000 |
| FBgn0032004 | 16.116  | 30.536  | 1.696  | 0.056 | -4.170 | 0.000 | 0.000 |
| FBgn0037228 | 338.577 | 641.479 | 35.674 | 0.056 | -4.168 | 0.000 | 0.000 |
| FBgn0052706 | 27.365  | 51.838  | 2.893  | 0.056 | -4.163 | 0.000 | 0.000 |
| FBgn0264718 | 209.562 | 396.881 | 22.242 | 0.056 | -4.157 | 0.000 | 0.000 |
| FBgn0063493 | 176.576 | 334.398 | 18.753 | 0.056 | -4.156 | 0.000 | 0.000 |
| FBgn0000564 | 5.931   | 11.230  | 0.632  | 0.056 | -4.152 | 0.001 | 0.005 |
| FBgn0033799 | 382.096 | 723.496 | 40.695 | 0.056 | -4.152 | 0.000 | 0.000 |
| FBgn0031270 | 74.199  | 140.387 | 8.012  | 0.057 | -4.131 | 0.000 | 0.000 |
| FBgn0029672 | 74.748  | 141.418 | 8.078  | 0.057 | -4.130 | 0.000 | 0.000 |
| FBgn0028894 | 138.496 | 261.932 | 15.061 | 0.057 | -4.120 | 0.000 | 0.001 |
| FBgn0037376 | 163.743 | 309.664 | 17.821 | 0.058 | -4.119 | 0.000 | 0.000 |
| FBgn0046999 | 202.220 | 382.428 | 22.012 | 0.058 | -4.119 | 0.000 | 0.000 |
| FBgn0063492 | 110.278 | 208.487 | 12.070 | 0.058 | -4.110 | 0.000 | 0.000 |
| FBgn0035335 | 380.851 | 719.841 | 41.860 | 0.058 | -4.104 | 0.000 | 0.000 |
| FBgn0036094 | 149.373 | 282.288 | 16.457 | 0.058 | -4.100 | 0.000 | 0.000 |

|             |           |           |          |       |        |       |       |
|-------------|-----------|-----------|----------|-------|--------|-------|-------|
| FBgn0010431 | 26.820    | 50.680    | 2.959    | 0.058 | -4.098 | 0.000 | 0.000 |
| FBgn0036911 | 447.967   | 846.292   | 49.642   | 0.059 | -4.092 | 0.000 | 0.000 |
| FBgn0037635 | 363.611   | 686.558   | 40.663   | 0.059 | -4.078 | 0.000 | 0.000 |
| FBgn0037818 | 102.218   | 192.965   | 11.470   | 0.059 | -4.072 | 0.000 | 0.000 |
| FBgn0028956 | 10.073    | 19.016    | 1.131    | 0.059 | -4.072 | 0.001 | 0.006 |
| FBgn0010217 | 13303.230 | 25109.402 | 1497.057 | 0.060 | -4.068 | 0.000 | 0.000 |
| FBgn0039622 | 20.679    | 39.030    | 2.327    | 0.060 | -4.068 | 0.000 | 0.000 |
| FBgn0010198 | 7576.195  | 14287.854 | 864.535  | 0.061 | -4.047 | 0.000 | 0.000 |
| FBgn0032085 | 5.529     | 10.426    | 0.632    | 0.061 | -4.045 | 0.014 | 0.045 |
| FBgn0260004 | 147.998   | 279.073   | 16.924   | 0.061 | -4.043 | 0.000 | 0.000 |
| FBgn0034232 | 132.787   | 250.279   | 15.295   | 0.061 | -4.032 | 0.000 | 0.000 |
| FBgn0034198 | 814.521   | 1535.117  | 93.925   | 0.061 | -4.031 | 0.000 | 0.000 |
| FBgn0260874 | 39.926    | 75.198    | 4.655    | 0.062 | -4.014 | 0.000 | 0.000 |
| FBgn0037061 | 249.096   | 469.134   | 29.058   | 0.062 | -4.013 | 0.000 | 0.000 |
| FBgn0032248 | 122.424   | 230.551   | 14.297   | 0.062 | -4.011 | 0.000 | 0.000 |
| FBgn0003655 | 21.633    | 40.739    | 2.526    | 0.062 | -4.011 | 0.000 | 0.000 |
| FBgn0040773 | 4643.789  | 8743.194  | 544.383  | 0.062 | -4.005 | 0.000 | 0.000 |
| FBgn0033527 | 87.527    | 164.782   | 10.273   | 0.062 | -4.004 | 0.000 | 0.000 |
| FBgn0014469 | 879.122   | 1654.477  | 103.768  | 0.063 | -3.995 | 0.000 | 0.000 |
| FBgn0001120 | 35.755    | 67.221    | 4.289    | 0.064 | -3.970 | 0.000 | 0.000 |
| FBgn0040392 | 24.566    | 46.173    | 2.959    | 0.064 | -3.964 | 0.000 | 0.000 |
| FBgn0037685 | 4.692     | 8.818     | 0.565    | 0.064 | -3.963 | 0.010 | 0.036 |
| FBgn0063495 | 85.985    | 161.595   | 10.374   | 0.064 | -3.961 | 0.000 | 0.000 |
| FBgn0032034 | 177.076   | 332.771   | 21.380   | 0.064 | -3.960 | 0.000 | 0.000 |
| FBgn0034191 | 149.448   | 280.841   | 18.055   | 0.064 | -3.959 | 0.000 | 0.000 |
| FBgn0038914 | 6265.496  | 11773.529 | 757.463  | 0.064 | -3.958 | 0.000 | 0.000 |
| FBgn0065055 | 14.024    | 26.353    | 1.696    | 0.064 | -3.958 | 0.002 | 0.009 |
| FBgn0047000 | 14.461    | 27.160    | 1.762    | 0.065 | -3.946 | 0.010 | 0.036 |
| FBgn0035109 | 110.118   | 206.804   | 13.431   | 0.065 | -3.945 | 0.000 | 0.000 |
| FBgn0032634 | 77.814    | 146.119   | 9.509    | 0.065 | -3.942 | 0.000 | 0.000 |
| FBgn0002869 | 41.544    | 78.001    | 5.088    | 0.065 | -3.938 | 0.001 | 0.006 |
| FBgn0264678 | 88.387    | 165.935   | 10.839   | 0.065 | -3.936 | 0.000 | 0.000 |
| FBgn0036331 | 57.437    | 107.826   | 7.049    | 0.065 | -3.935 | 0.000 | 0.000 |
| FBgn0034033 | 390.990   | 733.933   | 48.047   | 0.065 | -3.933 | 0.000 | 0.000 |

|             |          |           |         |       |        |       |       |
|-------------|----------|-----------|---------|-------|--------|-------|-------|
| FBgn0036306 | 123.527  | 231.861   | 15.194  | 0.066 | -3.932 | 0.000 | 0.000 |
| FBgn0038850 | 46.784   | 87.782    | 5.786   | 0.066 | -3.923 | 0.000 | 0.000 |
| FBgn0036550 | 107.364  | 201.429   | 13.299  | 0.066 | -3.921 | 0.000 | 0.000 |
| FBgn0032834 | 179.974  | 337.569   | 22.378  | 0.066 | -3.915 | 0.000 | 0.000 |
| FBgn0083983 | 217.642  | 408.152   | 27.131  | 0.066 | -3.911 | 0.000 | 0.000 |
| FBgn0054039 | 203.046  | 380.757   | 25.334  | 0.067 | -3.910 | 0.000 | 0.000 |
| FBgn0028952 | 4.498    | 8.431     | 0.565   | 0.067 | -3.899 | 0.013 | 0.043 |
| FBgn0050055 | 650.744  | 1219.530  | 81.958  | 0.067 | -3.895 | 0.000 | 0.000 |
| FBgn0013746 | 544.718  | 1020.577  | 68.859  | 0.067 | -3.890 | 0.000 | 0.000 |
| FBgn0040922 | 42.241   | 79.128    | 5.353   | 0.068 | -3.886 | 0.013 | 0.044 |
| FBgn0040508 | 4.981    | 9.331     | 0.632   | 0.068 | -3.885 | 0.006 | 0.022 |
| FBgn0032896 | 426.440  | 798.750   | 54.129  | 0.068 | -3.883 | 0.000 | 0.000 |
| FBgn0028697 | 6036.705 | 11300.570 | 772.840 | 0.068 | -3.870 | 0.000 | 0.000 |
| FBgn0039732 | 167.973  | 314.433   | 21.513  | 0.068 | -3.869 | 0.000 | 0.000 |
| FBgn0028546 | 594.750  | 1112.826  | 76.675  | 0.069 | -3.859 | 0.000 | 0.000 |
| FBgn0010423 | 4.370    | 8.174     | 0.565   | 0.069 | -3.854 | 0.013 | 0.043 |
| FBgn0058045 | 856.064  | 1601.181  | 110.947 | 0.069 | -3.851 | 0.000 | 0.000 |
| FBgn0004911 | 13.075   | 24.454    | 1.696   | 0.069 | -3.850 | 0.000 | 0.000 |
| FBgn0050099 | 9.738    | 18.212    | 1.263   | 0.069 | -3.850 | 0.001 | 0.006 |
| FBgn0011823 | 89.368   | 167.134   | 11.603  | 0.069 | -3.848 | 0.000 | 0.000 |
| FBgn0050187 | 14.027   | 26.226    | 1.829   | 0.070 | -3.842 | 0.000 | 0.001 |
| FBgn0033742 | 27.537   | 51.484    | 3.591   | 0.070 | -3.842 | 0.000 | 0.000 |
| FBgn0029714 | 205.323  | 383.846   | 26.799  | 0.070 | -3.840 | 0.000 | 0.000 |
| FBgn0036887 | 907.767  | 1696.768  | 118.766 | 0.070 | -3.837 | 0.000 | 0.000 |
| FBgn0032434 | 8.626    | 16.120    | 1.131   | 0.070 | -3.834 | 0.003 | 0.014 |
| FBgn0040551 | 548.606  | 1025.163  | 72.048  | 0.070 | -3.831 | 0.000 | 0.000 |
| FBgn0034443 | 475.939  | 889.338   | 62.540  | 0.070 | -3.830 | 0.000 | 0.000 |
| FBgn0083972 | 351.104  | 655.992   | 46.215  | 0.070 | -3.827 | 0.000 | 0.000 |
| FBgn0035528 | 509.454  | 951.550   | 67.359  | 0.071 | -3.820 | 0.000 | 0.000 |
| FBgn0031986 | 13.785   | 25.742    | 1.829   | 0.071 | -3.815 | 0.000 | 0.000 |
| FBgn0041147 | 46.710   | 87.202    | 6.218   | 0.071 | -3.810 | 0.000 | 0.000 |
| FBgn0031904 | 338.319  | 631.389   | 45.249  | 0.072 | -3.803 | 0.000 | 0.000 |
| FBgn0027093 | 183.741  | 342.877   | 24.605  | 0.072 | -3.801 | 0.000 | 0.000 |
| FBgn0039135 | 801.331  | 1495.268  | 107.394 | 0.072 | -3.799 | 0.000 | 0.000 |



|             |           |           |          |       |        |       |       |
|-------------|-----------|-----------|----------|-------|--------|-------|-------|
| FBgn0039006 | 84.068    | 156.865   | 11.271   | 0.072 | -3.799 | 0.000 | 0.000 |
| FBgn0261020 | 240.952   | 449.553   | 32.351   | 0.072 | -3.797 | 0.000 | 0.000 |
| FBgn0040813 | 51792.518 | 96616.439 | 6968.597 | 0.072 | -3.793 | 0.000 | 0.000 |
| FBgn0035636 | 12.560    | 23.423    | 1.696    | 0.072 | -3.788 | 0.000 | 0.001 |
| FBgn0030704 | 215.963   | 402.732   | 29.193   | 0.072 | -3.786 | 0.000 | 0.000 |
| FBgn0032986 | 400.902   | 747.510   | 54.294   | 0.073 | -3.783 | 0.000 | 0.000 |
| FBgn0039779 | 9.319     | 17.375    | 1.263    | 0.073 | -3.782 | 0.005 | 0.018 |
| FBgn0040256 | 174.915   | 326.023   | 23.806   | 0.073 | -3.776 | 0.000 | 0.000 |
| FBgn0261386 | 17.061    | 31.794    | 2.327    | 0.073 | -3.772 | 0.009 | 0.032 |
| FBgn0053635 | 98.711    | 183.924   | 13.498   | 0.073 | -3.768 | 0.000 | 0.000 |
| FBgn0040754 | 1573.384  | 2930.443  | 216.325  | 0.074 | -3.760 | 0.002 | 0.008 |
| FBgn0038795 | 354.173   | 659.305   | 49.042   | 0.074 | -3.749 | 0.000 | 0.000 |
| FBgn0259992 | 331.485   | 616.754   | 46.215   | 0.075 | -3.738 | 0.000 | 0.000 |
| FBgn0050054 | 184.535   | 343.268   | 25.801   | 0.075 | -3.734 | 0.000 | 0.000 |
| FBgn0036587 | 372.909   | 693.589   | 52.229   | 0.075 | -3.731 | 0.000 | 0.000 |
| FBgn0033439 | 119.036   | 221.250   | 16.823   | 0.076 | -3.717 | 0.000 | 0.000 |
| FBgn0037017 | 48.764    | 90.611    | 6.916    | 0.076 | -3.712 | 0.000 | 0.000 |
| FBgn0033467 | 73.547    | 136.586   | 10.507   | 0.077 | -3.700 | 0.000 | 0.000 |
| FBgn0032247 | 91.546    | 169.992   | 13.100   | 0.077 | -3.698 | 0.000 | 0.000 |
| FBgn0039735 | 809.389   | 1502.608  | 116.170  | 0.077 | -3.693 | 0.000 | 0.000 |
| FBgn0032017 | 111.331   | 206.670   | 15.993   | 0.077 | -3.692 | 0.000 | 0.000 |
| FBgn0050151 | 324.567   | 602.420   | 46.714   | 0.078 | -3.689 | 0.000 | 0.000 |
| FBgn0040099 | 852.399   | 1581.551  | 123.247  | 0.078 | -3.682 | 0.001 | 0.003 |
| FBgn0033303 | 65.083    | 120.723   | 9.443    | 0.078 | -3.676 | 0.001 | 0.005 |
| FBgn0085285 | 8.225     | 15.253    | 1.197    | 0.078 | -3.672 | 0.003 | 0.014 |
| FBgn0262825 | 32.850    | 60.912    | 4.788    | 0.079 | -3.669 | 0.000 | 0.000 |
| FBgn0033261 | 208.259   | 386.162   | 30.355   | 0.079 | -3.669 | 0.000 | 0.000 |
| FBgn0262307 | 15.870    | 29.412    | 2.327    | 0.079 | -3.660 | 0.003 | 0.014 |
| FBgn0044812 | 53.684    | 99.488    | 7.879    | 0.079 | -3.658 | 0.000 | 0.000 |
| FBgn0035209 | 16.738    | 31.016    | 2.460    | 0.079 | -3.656 | 0.010 | 0.035 |
| FBgn0034001 | 784.566   | 1453.527  | 115.605  | 0.080 | -3.652 | 0.001 | 0.005 |
| FBgn0086602 | 7.628     | 14.125    | 1.131    | 0.080 | -3.643 | 0.007 | 0.026 |
| FBgn0032002 | 114.991   | 212.726   | 17.256   | 0.081 | -3.624 | 0.000 | 0.000 |
| FBgn0038959 | 274.604   | 507.979   | 41.229   | 0.081 | -3.623 | 0.000 | 0.000 |

|             |          |          |         |       |        |       |       |
|-------------|----------|----------|---------|-------|--------|-------|-------|
| FBgn0051860 | 15.918   | 29.442   | 2.394   | 0.081 | -3.620 | 0.000 | 0.000 |
| FBgn0020416 | 764.764  | 1414.324 | 115.204 | 0.081 | -3.618 | 0.000 | 0.000 |
| FBgn0033906 | 1834.310 | 3390.078 | 278.542 | 0.082 | -3.605 | 0.000 | 0.000 |
| FBgn0025334 | 14.871   | 27.480   | 2.261   | 0.082 | -3.603 | 0.000 | 0.000 |
| FBgn0047135 | 3252.846 | 6010.931 | 494.761 | 0.082 | -3.603 | 0.000 | 0.000 |
| FBgn0030170 | 7.354    | 13.578   | 1.131   | 0.083 | -3.586 | 0.007 | 0.027 |
| FBgn0002939 | 58.466   | 107.923  | 9.010   | 0.083 | -3.582 | 0.000 | 0.000 |
| FBgn0037100 | 8.193    | 15.123   | 1.263   | 0.084 | -3.582 | 0.004 | 0.017 |
| FBgn0042205 | 41.046   | 75.741   | 6.351   | 0.084 | -3.576 | 0.000 | 0.000 |
| FBgn0052196 | 26.726   | 49.296   | 4.156   | 0.084 | -3.568 | 0.000 | 0.000 |
| FBgn0042213 | 196.367  | 362.079  | 30.655  | 0.085 | -3.562 | 0.000 | 0.000 |
| FBgn0259713 | 70.067   | 129.195  | 10.940  | 0.085 | -3.562 | 0.000 | 0.000 |
| FBgn0031389 | 297.392  | 548.304  | 46.481  | 0.085 | -3.560 | 0.000 | 0.000 |
| FBgn0032250 | 151.598  | 279.456  | 23.739  | 0.085 | -3.557 | 0.000 | 0.000 |
| FBgn0032922 | 129.415  | 238.513  | 20.316  | 0.085 | -3.553 | 0.000 | 0.000 |
| FBgn0032215 | 145.626  | 268.379  | 22.874  | 0.085 | -3.552 | 0.000 | 0.000 |
| FBgn0065032 | 80.810   | 148.918  | 12.702  | 0.085 | -3.551 | 0.000 | 0.000 |
| FBgn0027259 | 47.922   | 88.296   | 7.548   | 0.085 | -3.548 | 0.000 | 0.000 |
| FBgn0037696 | 114.923  | 211.658  | 18.187  | 0.086 | -3.541 | 0.000 | 0.000 |
| FBgn0034951 | 844.220  | 1554.512 | 133.928 | 0.086 | -3.537 | 0.000 | 0.000 |
| FBgn0026314 | 853.311  | 1570.637 | 135.984 | 0.087 | -3.530 | 0.000 | 0.000 |
| FBgn0039045 | 49.019   | 90.224   | 7.813   | 0.087 | -3.530 | 0.000 | 0.000 |
| FBgn0052373 | 11.050   | 20.338   | 1.762   | 0.087 | -3.529 | 0.000 | 0.002 |
| FBgn0033131 | 68.440   | 125.941  | 10.940  | 0.087 | -3.525 | 0.000 | 0.000 |
| FBgn0002466 | 26.325   | 48.428   | 4.222   | 0.087 | -3.520 | 0.000 | 0.000 |
| FBgn0010607 | 331.667  | 609.867  | 53.466  | 0.088 | -3.512 | 0.000 | 0.000 |
| FBgn0032637 | 22.678   | 41.699   | 3.657   | 0.088 | -3.511 | 0.001 | 0.004 |
| FBgn0027780 | 238.184  | 437.798  | 38.570  | 0.088 | -3.505 | 0.000 | 0.000 |
| FBgn0002791 | 148.690  | 273.244  | 24.137  | 0.088 | -3.501 | 0.000 | 0.000 |
| FBgn0062449 | 128.725  | 236.536  | 20.913  | 0.088 | -3.500 | 0.000 | 0.000 |
| FBgn0032648 | 6.904    | 12.677   | 1.131   | 0.089 | -3.487 | 0.009 | 0.033 |
| FBgn0033615 | 68.813   | 126.354  | 11.271  | 0.089 | -3.487 | 0.000 | 0.000 |
| FBgn0003124 | 30.439   | 55.891   | 4.987   | 0.089 | -3.486 | 0.000 | 0.000 |
| FBgn0035855 | 24.488   | 44.952   | 4.023   | 0.090 | -3.482 | 0.000 | 0.000 |

|             |           |           |          |       |        |       |       |
|-------------|-----------|-----------|----------|-------|--------|-------|-------|
| FBgn0039836 | 22.133    | 40.608    | 3.657    | 0.090 | -3.473 | 0.000 | 0.000 |
| FBgn0033453 | 261.284   | 479.147   | 43.421   | 0.091 | -3.464 | 0.000 | 0.000 |
| FBgn0015034 | 7.598     | 13.932    | 1.263    | 0.091 | -3.463 | 0.010 | 0.035 |
| FBgn0037662 | 7.162     | 13.128    | 1.197    | 0.091 | -3.455 | 0.006 | 0.022 |
| FBgn0034481 | 6.759     | 12.387    | 1.131    | 0.091 | -3.454 | 0.004 | 0.017 |
| FBgn0032032 | 130.521   | 239.197   | 21.844   | 0.091 | -3.453 | 0.000 | 0.000 |
| FBgn0035838 | 35.297    | 64.675    | 5.918    | 0.092 | -3.450 | 0.000 | 0.000 |
| FBgn0052221 | 209.157   | 383.203   | 35.111   | 0.092 | -3.448 | 0.000 | 0.000 |
| FBgn0053260 | 25.939    | 47.524    | 4.355    | 0.092 | -3.448 | 0.000 | 0.000 |
| FBgn0017545 | 11603.727 | 21258.880 | 1948.573 | 0.092 | -3.448 | 0.000 | 0.000 |
| FBgn0051785 | 43.929    | 80.442    | 7.415    | 0.092 | -3.439 | 0.000 | 0.000 |
| FBgn0036116 | 1080.962  | 1979.422  | 182.502  | 0.092 | -3.439 | 0.000 | 0.000 |
| FBgn0034475 | 568.322   | 1040.684  | 95.961   | 0.092 | -3.439 | 0.000 | 0.000 |
| FBgn0085351 | 105.455   | 193.088   | 17.821   | 0.092 | -3.438 | 0.000 | 0.000 |
| FBgn0034266 | 7.469     | 13.675    | 1.263    | 0.092 | -3.436 | 0.004 | 0.015 |
| FBgn0263379 | 7.438     | 13.612    | 1.263    | 0.093 | -3.430 | 0.007 | 0.026 |
| FBgn0000404 | 69.907    | 127.910   | 11.903   | 0.093 | -3.426 | 0.000 | 0.000 |
| FBgn0037950 | 191.144   | 349.737   | 32.550   | 0.093 | -3.426 | 0.000 | 0.000 |
| FBgn0051111 | 44.994    | 82.307    | 7.680    | 0.093 | -3.422 | 0.000 | 0.000 |
| FBgn0003374 | 6.986     | 12.774    | 1.197    | 0.094 | -3.416 | 0.010 | 0.036 |
| FBgn0040968 | 91.071    | 166.516   | 15.626   | 0.094 | -3.414 | 0.000 | 0.000 |
| FBgn0037960 | 137.262   | 250.852   | 23.673   | 0.094 | -3.406 | 0.000 | 0.000 |
| FBgn0260720 | 38.236    | 69.857    | 6.616    | 0.095 | -3.400 | 0.000 | 0.000 |
| FBgn0015299 | 192.294   | 351.274   | 33.315   | 0.095 | -3.398 | 0.000 | 0.000 |
| FBgn0026634 | 219.291   | 400.544   | 38.039   | 0.095 | -3.396 | 0.000 | 0.000 |
| FBgn0052407 | 284.949   | 520.291   | 49.607   | 0.095 | -3.391 | 0.000 | 0.000 |
| FBgn0037934 | 150.968   | 275.503   | 26.433   | 0.096 | -3.382 | 0.000 | 0.000 |
| FBgn0033041 | 7.212     | 13.161    | 1.263    | 0.096 | -3.381 | 0.014 | 0.046 |
| FBgn0036745 | 883.128   | 1611.112  | 155.144  | 0.096 | -3.376 | 0.000 | 0.000 |
| FBgn0264266 | 6.760     | 12.324    | 1.197    | 0.097 | -3.364 | 0.015 | 0.047 |
| FBgn0259991 | 34.867    | 63.551    | 6.184    | 0.097 | -3.361 | 0.000 | 0.000 |
| FBgn0012042 | 1376.036  | 2507.928  | 244.145  | 0.097 | -3.361 | 0.000 | 0.000 |
| FBgn0032613 | 114.087   | 207.928   | 20.247   | 0.097 | -3.360 | 0.000 | 0.000 |
| FBgn0000229 | 775.296   | 1412.749  | 137.844  | 0.098 | -3.357 | 0.000 | 0.000 |

|             |           |           |          |       |        |       |       |
|-------------|-----------|-----------|----------|-------|--------|-------|-------|
| FBgn0034293 | 34.029    | 62.007    | 6.051    | 0.098 | -3.357 | 0.000 | 0.000 |
| FBgn0039116 | 112.043   | 204.135   | 19.950   | 0.098 | -3.355 | 0.000 | 0.000 |
| FBgn0033215 | 19.039    | 34.686    | 3.392    | 0.098 | -3.354 | 0.000 | 0.000 |
| FBgn0032873 | 135.435   | 246.698   | 24.172   | 0.098 | -3.351 | 0.000 | 0.000 |
| FBgn0031707 | 10.214    | 18.599    | 1.829    | 0.098 | -3.346 | 0.002 | 0.010 |
| FBgn0033032 | 298.214   | 542.996   | 53.431   | 0.098 | -3.345 | 0.000 | 0.000 |
| FBgn0050195 | 12.585    | 22.910    | 2.261    | 0.099 | -3.341 | 0.000 | 0.001 |
| FBgn0039911 | 1196.301  | 2177.653  | 214.949  | 0.099 | -3.341 | 0.000 | 0.000 |
| FBgn0086681 | 7.019     | 12.774    | 1.263    | 0.099 | -3.338 | 0.006 | 0.023 |
| FBgn0038074 | 181.880   | 330.977   | 32.784   | 0.099 | -3.336 | 0.000 | 0.002 |
| FBgn0051278 | 148.430   | 269.927   | 26.932   | 0.100 | -3.325 | 0.000 | 0.000 |
| FBgn0033754 | 37.177    | 67.605    | 6.749    | 0.100 | -3.324 | 0.000 | 0.000 |
| FBgn0032018 | 625.449   | 1137.183  | 113.716  | 0.100 | -3.322 | 0.000 | 0.000 |
| FBgn0032596 | 825.504   | 1500.849  | 150.160  | 0.100 | -3.321 | 0.000 | 0.000 |
| FBgn0028526 | 2257.714  | 4103.057  | 412.370  | 0.101 | -3.315 | 0.000 | 0.000 |
| FBgn0031662 | 412.462   | 749.548   | 75.377   | 0.101 | -3.314 | 0.000 | 0.000 |
| FBgn0040571 | 303.598   | 551.639   | 55.557   | 0.101 | -3.312 | 0.000 | 0.000 |
| FBgn0038631 | 211.151   | 383.400   | 38.901   | 0.101 | -3.301 | 0.000 | 0.002 |
| FBgn0261882 | 41.662    | 75.644    | 7.680    | 0.102 | -3.300 | 0.000 | 0.000 |
| FBgn0066292 | 68.728    | 124.754   | 12.702   | 0.102 | -3.296 | 0.000 | 0.000 |
| FBgn0036105 | 61.257    | 111.176   | 11.338   | 0.102 | -3.294 | 0.000 | 0.000 |
| FBgn0264369 | 6.825     | 12.387    | 1.263    | 0.102 | -3.294 | 0.005 | 0.020 |
| FBgn0039325 | 497.319   | 902.407   | 92.232   | 0.102 | -3.290 | 0.000 | 0.000 |
| FBgn0034538 | 413.028   | 749.447   | 76.609   | 0.102 | -3.290 | 0.000 | 0.003 |
| FBgn0014092 | 500.275   | 907.720   | 92.829   | 0.102 | -3.290 | 0.000 | 0.001 |
| FBgn0031689 | 1335.058  | 2422.182  | 247.935  | 0.102 | -3.288 | 0.000 | 0.000 |
| FBgn0004378 | 10.199    | 18.503    | 1.895    | 0.102 | -3.288 | 0.005 | 0.019 |
| FBgn0032047 | 42.392    | 76.869    | 7.914    | 0.103 | -3.280 | 0.000 | 0.000 |
| FBgn0015037 | 679.444   | 1232.014  | 126.873  | 0.103 | -3.280 | 0.000 | 0.000 |
| FBgn0027341 | 1023.435  | 1854.123  | 192.747  | 0.104 | -3.266 | 0.000 | 0.000 |
| FBgn0037611 | 44.459    | 80.539    | 8.378    | 0.104 | -3.265 | 0.000 | 0.000 |
| FBgn0085302 | 15.943    | 28.861    | 3.025    | 0.105 | -3.254 | 0.000 | 0.000 |
| FBgn0037936 | 209.487   | 379.175   | 39.798   | 0.105 | -3.252 | 0.000 | 0.000 |
| FBgn0032987 | 16932.844 | 30641.795 | 3223.893 | 0.105 | -3.249 | 0.000 | 0.000 |

|             |           |           |          |       |        |       |       |
|-------------|-----------|-----------|----------|-------|--------|-------|-------|
| FBgn0050005 | 75.754    | 137.078   | 14.429   | 0.105 | -3.248 | 0.000 | 0.000 |
| FBgn0040736 | 36381.232 | 65831.357 | 6931.107 | 0.105 | -3.248 | 0.001 | 0.006 |
| FBgn0034729 | 25.757    | 46.593    | 4.920    | 0.106 | -3.243 | 0.000 | 0.000 |
| FBgn0032404 | 1239.190  | 2241.243  | 237.137  | 0.106 | -3.241 | 0.000 | 0.000 |
| FBgn0030291 | 156.767   | 283.476   | 30.059   | 0.106 | -3.237 | 0.000 | 0.000 |
| FBgn0038849 | 136.242   | 246.352   | 26.133   | 0.106 | -3.237 | 0.000 | 0.000 |
| FBgn0053987 | 44.979    | 81.280    | 8.678    | 0.107 | -3.227 | 0.000 | 0.000 |
| FBgn0260467 | 13.040    | 23.554    | 2.526    | 0.107 | -3.221 | 0.001 | 0.003 |
| FBgn0051205 | 149.379   | 269.801   | 28.957   | 0.107 | -3.220 | 0.000 | 0.000 |
| FBgn0260399 | 34.620    | 62.491    | 6.749    | 0.108 | -3.211 | 0.000 | 0.000 |
| FBgn0039766 | 123.480   | 222.854   | 24.106   | 0.108 | -3.209 | 0.000 | 0.000 |
| FBgn0259184 | 9.345     | 16.861    | 1.829    | 0.108 | -3.205 | 0.001 | 0.005 |
| FBgn0028433 | 693.969   | 1251.288  | 136.650  | 0.109 | -3.195 | 0.000 | 0.000 |
| FBgn0033821 | 521.560   | 940.350   | 102.770  | 0.109 | -3.194 | 0.000 | 0.000 |
| FBgn0050285 | 406.966   | 733.568   | 80.364   | 0.110 | -3.190 | 0.000 | 0.000 |
| FBgn0035089 | 418.818   | 754.714   | 82.922   | 0.110 | -3.186 | 0.000 | 0.000 |
| FBgn0037552 | 118.241   | 213.042   | 23.439   | 0.110 | -3.184 | 0.000 | 0.000 |
| FBgn0038020 | 677.670   | 1220.845  | 134.496  | 0.110 | -3.182 | 0.000 | 0.000 |
| FBgn0042129 | 255.486   | 460.235   | 50.738   | 0.110 | -3.181 | 0.000 | 0.000 |
| FBgn0011762 | 26.197    | 47.174    | 5.220    | 0.111 | -3.176 | 0.000 | 0.000 |
| FBgn0037105 | 57.959    | 104.316   | 11.603   | 0.111 | -3.168 | 0.000 | 0.000 |
| FBgn0037076 | 90.214    | 162.306   | 18.121   | 0.112 | -3.163 | 0.000 | 0.000 |
| FBgn0034246 | 447.164   | 804.489   | 89.838   | 0.112 | -3.163 | 0.000 | 0.000 |
| FBgn0259990 | 14.687    | 26.416    | 2.959    | 0.112 | -3.158 | 0.000 | 0.000 |
| FBgn0032153 | 165.057   | 296.730   | 33.384   | 0.113 | -3.152 | 0.001 | 0.005 |
| FBgn0263607 | 206.962   | 372.032   | 41.892   | 0.113 | -3.151 | 0.000 | 0.000 |
| FBgn0041336 | 16.739    | 30.086    | 3.392    | 0.113 | -3.149 | 0.000 | 0.000 |
| FBgn0037935 | 249.170   | 447.606   | 50.735   | 0.113 | -3.141 | 0.000 | 0.000 |
| FBgn0038346 | 440.019   | 790.326   | 89.711   | 0.114 | -3.139 | 0.000 | 0.000 |
| FBgn0262477 | 467.811   | 840.102   | 95.519   | 0.114 | -3.137 | 0.000 | 0.000 |
| FBgn0061197 | 11.396    | 20.464    | 2.327    | 0.114 | -3.136 | 0.001 | 0.005 |
| FBgn0035423 | 2234.486  | 4011.688  | 457.283  | 0.114 | -3.133 | 0.000 | 0.000 |
| FBgn0051974 | 474.070   | 851.083   | 97.057   | 0.114 | -3.132 | 0.000 | 0.000 |
| FBgn0031907 | 579.660   | 1040.587  | 118.734  | 0.114 | -3.132 | 0.000 | 0.000 |

|             |          |          |         |       |        |       |       |
|-------------|----------|----------|---------|-------|--------|-------|-------|
| FBgn0031701 | 137.218  | 246.210  | 28.227  | 0.115 | -3.125 | 0.000 | 0.000 |
| FBgn0032033 | 179.361  | 321.747  | 36.975  | 0.115 | -3.121 | 0.000 | 0.000 |
| FBgn0066293 | 11.606   | 20.818   | 2.394   | 0.115 | -3.120 | 0.002 | 0.010 |
| FBgn0038893 | 91.671   | 164.391  | 18.952  | 0.115 | -3.117 | 0.000 | 0.000 |
| FBgn0085757 | 11.253   | 20.178   | 2.327   | 0.115 | -3.116 | 0.013 | 0.042 |
| FBgn0033773 | 20.082   | 36.008   | 4.156   | 0.115 | -3.115 | 0.000 | 0.001 |
| FBgn0033900 | 203.071  | 364.082  | 42.059  | 0.116 | -3.114 | 0.000 | 0.000 |
| FBgn0011509 | 495.384  | 888.159  | 102.609 | 0.116 | -3.114 | 0.000 | 0.000 |
| FBgn0260474 | 162.656  | 291.531  | 33.782  | 0.116 | -3.109 | 0.000 | 0.000 |
| FBgn0038363 | 187.672  | 336.341  | 39.002  | 0.116 | -3.108 | 0.000 | 0.000 |
| FBgn0032196 | 201.573  | 361.253  | 41.892  | 0.116 | -3.108 | 0.000 | 0.000 |
| FBgn0039024 | 1440.945 | 2581.686 | 300.204 | 0.116 | -3.104 | 0.000 | 0.000 |
| FBgn0040732 | 1002.020 | 1794.564 | 209.475 | 0.117 | -3.099 | 0.000 | 0.000 |
| FBgn0038472 | 232.663  | 416.682  | 48.644  | 0.117 | -3.099 | 0.000 | 0.000 |
| FBgn0034965 | 11.752   | 21.045   | 2.460   | 0.117 | -3.097 | 0.001 | 0.004 |
| FBgn0085218 | 40.195   | 71.945   | 8.445   | 0.117 | -3.091 | 0.000 | 0.000 |
| FBgn0032189 | 112.068  | 200.529  | 23.607  | 0.118 | -3.087 | 0.000 | 0.000 |
| FBgn0039052 | 31.190   | 55.765   | 6.616   | 0.119 | -3.075 | 0.000 | 0.000 |
| FBgn0036723 | 41.504   | 74.196   | 8.811   | 0.119 | -3.074 | 0.000 | 0.000 |
| FBgn0039065 | 86.529   | 154.672  | 18.386  | 0.119 | -3.073 | 0.000 | 0.000 |
| FBgn0031834 | 156.915  | 280.450  | 33.381  | 0.119 | -3.071 | 0.000 | 0.000 |
| FBgn0038858 | 551.608  | 985.209  | 118.008 | 0.120 | -3.062 | 0.000 | 0.000 |
| FBgn0037885 | 102.406  | 182.901  | 21.911  | 0.120 | -3.061 | 0.000 | 0.000 |
| FBgn0052284 | 8.831    | 15.767   | 1.895   | 0.120 | -3.057 | 0.015 | 0.047 |
| FBgn0031655 | 122.838  | 219.310  | 26.367  | 0.120 | -3.056 | 0.000 | 0.000 |
| FBgn0053180 | 976.008  | 1742.383 | 209.633 | 0.120 | -3.055 | 0.000 | 0.000 |
| FBgn0039782 | 8.492    | 15.156   | 1.829   | 0.121 | -3.051 | 0.012 | 0.040 |
| FBgn0000594 | 11.382   | 20.304   | 2.460   | 0.121 | -3.045 | 0.001 | 0.004 |
| FBgn0039053 | 8.766    | 15.637   | 1.895   | 0.121 | -3.045 | 0.002 | 0.010 |
| FBgn0082995 | 36.101   | 64.389   | 7.813   | 0.121 | -3.043 | 0.000 | 0.000 |
| FBgn0035611 | 18.568   | 33.112   | 4.023   | 0.122 | -3.041 | 0.000 | 0.001 |
| FBgn0027844 | 1592.864 | 2838.557 | 347.171 | 0.122 | -3.031 | 0.000 | 0.000 |
| FBgn0039914 | 313.715  | 559.038  | 68.391  | 0.122 | -3.031 | 0.000 | 0.000 |
| FBgn0042174 | 1694.642 | 3019.265 | 370.020 | 0.123 | -3.029 | 0.000 | 0.000 |

|             |          |          |         |       |        |       |       |
|-------------|----------|----------|---------|-------|--------|-------|-------|
| FBgn0037824 | 18.696   | 33.302   | 4.090   | 0.123 | -3.026 | 0.000 | 0.000 |
| FBgn0031693 | 205.164  | 365.411  | 44.917  | 0.123 | -3.024 | 0.000 | 0.000 |
| FBgn0035120 | 239.769  | 427.034  | 52.503  | 0.123 | -3.024 | 0.000 | 0.000 |
| FBgn0031974 | 44.626   | 79.478   | 9.774   | 0.123 | -3.023 | 0.000 | 0.000 |
| FBgn0262828 | 57.882   | 103.061  | 12.702  | 0.123 | -3.020 | 0.000 | 0.001 |
| FBgn0262993 | 14.047   | 25.001   | 3.092   | 0.124 | -3.016 | 0.000 | 0.003 |
| FBgn0050423 | 901.572  | 1604.285 | 198.858 | 0.124 | -3.012 | 0.000 | 0.000 |
| FBgn0051776 | 5.699    | 10.135   | 1.263   | 0.125 | -3.004 | 0.005 | 0.018 |
| FBgn0051286 | 13.046   | 23.200   | 2.893   | 0.125 | -3.004 | 0.002 | 0.009 |
| FBgn0037263 | 18.972   | 33.722   | 4.222   | 0.125 | -2.998 | 0.000 | 0.001 |
| FBgn0259711 | 83.461   | 148.337  | 18.585  | 0.125 | -2.997 | 0.000 | 0.000 |
| FBgn0035960 | 63.892   | 113.554  | 14.230  | 0.125 | -2.996 | 0.000 | 0.000 |
| FBgn0038446 | 401.270  | 713.163  | 89.377  | 0.125 | -2.996 | 0.000 | 0.000 |
| FBgn0052442 | 84.333   | 149.882  | 18.784  | 0.125 | -2.996 | 0.000 | 0.000 |
| FBgn0262679 | 13.273   | 23.587   | 2.959   | 0.125 | -2.995 | 0.002 | 0.008 |
| FBgn0034614 | 13.563   | 24.101   | 3.025   | 0.126 | -2.994 | 0.001 | 0.006 |
| FBgn0036818 | 56.871   | 101.041  | 12.702  | 0.126 | -2.992 | 0.000 | 0.000 |
| FBgn0020633 | 52.480   | 93.191   | 11.770  | 0.126 | -2.985 | 0.000 | 0.000 |
| FBgn0038002 | 11.222   | 19.917   | 2.526   | 0.127 | -2.979 | 0.005 | 0.021 |
| FBgn0051812 | 34.344   | 60.942   | 7.747   | 0.127 | -2.976 | 0.000 | 0.000 |
| FBgn0037150 | 138.980  | 246.575  | 31.385  | 0.127 | -2.974 | 0.000 | 0.000 |
| FBgn0038582 | 92.252   | 163.658  | 20.847  | 0.127 | -2.973 | 0.000 | 0.000 |
| FBgn0038194 | 2520.926 | 4472.132 | 569.720 | 0.127 | -2.973 | 0.000 | 0.000 |
| FBgn0024733 | 4398.965 | 7801.275 | 996.654 | 0.128 | -2.969 | 0.000 | 0.000 |
| FBgn0036787 | 45.278   | 80.282   | 10.273  | 0.128 | -2.966 | 0.000 | 0.000 |
| FBgn0036062 | 155.452  | 275.563  | 35.342  | 0.128 | -2.963 | 0.000 | 0.000 |
| FBgn0036300 | 395.589  | 701.175  | 90.002  | 0.128 | -2.962 | 0.000 | 0.000 |
| FBgn0036117 | 122.527  | 217.159  | 27.895  | 0.128 | -2.961 | 0.000 | 0.000 |
| FBgn0050357 | 40.804   | 72.298   | 9.310   | 0.129 | -2.957 | 0.000 | 0.000 |
| FBgn0025827 | 631.363  | 1118.516 | 144.210 | 0.129 | -2.955 | 0.000 | 0.000 |
| FBgn0039251 | 10.755   | 19.050   | 2.460   | 0.129 | -2.953 | 0.008 | 0.028 |
| FBgn0259985 | 1054.419 | 1867.021 | 241.817 | 0.130 | -2.949 | 0.000 | 0.000 |
| FBgn0026144 | 60.056   | 106.315  | 13.798  | 0.130 | -2.946 | 0.000 | 0.000 |
| FBgn0261990 | 897.397  | 1588.217 | 206.576 | 0.130 | -2.943 | 0.002 | 0.011 |

|             |          |          |         |       |        |       |       |
|-------------|----------|----------|---------|-------|--------|-------|-------|
| FBgn0264541 | 167.082  | 295.628  | 38.535  | 0.130 | -2.940 | 0.001 | 0.004 |
| FBgn0041191 | 1608.890 | 2846.513 | 371.266 | 0.130 | -2.939 | 0.000 | 0.000 |
| FBgn0033388 | 63.467   | 112.270  | 14.663  | 0.131 | -2.937 | 0.000 | 0.000 |
| FBgn0028707 | 25.322   | 44.792   | 5.852   | 0.131 | -2.936 | 0.000 | 0.000 |
| FBgn0003278 | 155.208  | 274.506  | 35.910  | 0.131 | -2.934 | 0.000 | 0.000 |
| FBgn0035906 | 1669.897 | 2953.171 | 386.624 | 0.131 | -2.933 | 0.000 | 0.000 |
| FBgn0032478 | 33.122   | 58.564   | 7.680   | 0.131 | -2.931 | 0.000 | 0.000 |
| FBgn0035356 | 122.815  | 217.036  | 28.593  | 0.132 | -2.924 | 0.000 | 0.000 |
| FBgn0039958 | 245.371  | 433.522  | 57.221  | 0.132 | -2.921 | 0.000 | 0.000 |
| FBgn0030813 | 63.129   | 111.529  | 14.729  | 0.132 | -2.921 | 0.000 | 0.000 |
| FBgn0040070 | 3920.751 | 6926.612 | 914.891 | 0.132 | -2.920 | 0.000 | 0.000 |
| FBgn0263338 | 7.542    | 13.321   | 1.762   | 0.132 | -2.918 | 0.008 | 0.030 |
| FBgn0036656 | 61.808   | 109.151  | 14.464  | 0.133 | -2.916 | 0.002 | 0.009 |
| FBgn0030309 | 2948.700 | 5202.089 | 695.310 | 0.134 | -2.903 | 0.009 | 0.033 |
| FBgn0047178 | 182.444  | 321.799  | 43.089  | 0.134 | -2.901 | 0.000 | 0.000 |
| FBgn0027507 | 267.762  | 472.153  | 63.370  | 0.134 | -2.897 | 0.000 | 0.000 |
| FBgn0260749 | 452.671  | 798.151  | 107.192 | 0.134 | -2.896 | 0.000 | 0.000 |
| FBgn0037921 | 56.864   | 100.262  | 13.466  | 0.134 | -2.896 | 0.000 | 0.000 |
| FBgn0037879 | 41.928   | 73.914   | 9.942   | 0.135 | -2.894 | 0.000 | 0.000 |
| FBgn0034061 | 922.497  | 1626.237 | 218.756 | 0.135 | -2.894 | 0.000 | 0.001 |
| FBgn0033993 | 12.467   | 21.975   | 2.959   | 0.135 | -2.893 | 0.001 | 0.006 |
| FBgn0015035 | 258.261  | 455.177  | 61.346  | 0.135 | -2.891 | 0.000 | 0.000 |
| FBgn0038037 | 1809.316 | 3188.748 | 429.883 | 0.135 | -2.891 | 0.000 | 0.000 |
| FBgn0263745 | 42.266   | 74.457   | 10.074  | 0.135 | -2.886 | 0.000 | 0.000 |
| FBgn0038034 | 158.778  | 279.653  | 37.903  | 0.136 | -2.883 | 0.000 | 0.000 |
| FBgn0032644 | 218.245  | 384.189  | 52.301  | 0.136 | -2.877 | 0.000 | 0.000 |
| FBgn0051800 | 220.153  | 387.539  | 52.768  | 0.136 | -2.877 | 0.000 | 0.000 |
| FBgn0063497 | 866.106  | 1524.063 | 208.148 | 0.137 | -2.872 | 0.000 | 0.000 |
| FBgn0085823 | 19.914   | 35.040   | 4.788   | 0.137 | -2.872 | 0.000 | 0.001 |
| FBgn0011596 | 12.566   | 22.106   | 3.025   | 0.137 | -2.869 | 0.001 | 0.005 |
| FBgn0039145 | 253.967  | 446.720  | 61.213  | 0.137 | -2.867 | 0.000 | 0.000 |
| FBgn0039415 | 21.933   | 38.580   | 5.287   | 0.137 | -2.867 | 0.000 | 0.000 |
| FBgn0262107 | 61.326   | 107.856  | 14.796  | 0.137 | -2.866 | 0.000 | 0.000 |
| FBgn0034967 | 2365.533 | 4158.449 | 572.618 | 0.138 | -2.860 | 0.000 | 0.000 |



|             |          |          |         |       |        |       |       |
|-------------|----------|----------|---------|-------|--------|-------|-------|
| FBgn0051467 | 9.884    | 17.375   | 2.394   | 0.138 | -2.860 | 0.002 | 0.010 |
| FBgn0031688 | 29.880   | 52.511   | 7.248   | 0.138 | -2.857 | 0.000 | 0.000 |
| FBgn0028396 | 95.310   | 167.480  | 23.139  | 0.138 | -2.856 | 0.000 | 0.000 |
| FBgn0046322 | 39.072   | 68.636   | 9.509   | 0.139 | -2.852 | 0.000 | 0.000 |
| FBgn0263967 | 19.657   | 34.526   | 4.788   | 0.139 | -2.850 | 0.000 | 0.001 |
| FBgn0015025 | 59.873   | 105.149  | 14.597  | 0.139 | -2.849 | 0.000 | 0.000 |
| FBgn0039154 | 9.546    | 16.764   | 2.327   | 0.139 | -2.849 | 0.005 | 0.021 |
| FBgn0037551 | 655.978  | 1151.858 | 160.099 | 0.139 | -2.847 | 0.000 | 0.000 |
| FBgn0036036 | 48.650   | 85.396   | 11.903  | 0.139 | -2.843 | 0.000 | 0.000 |
| FBgn0053995 | 124.471  | 218.454  | 30.488  | 0.140 | -2.841 | 0.000 | 0.000 |
| FBgn0027500 | 33.907   | 59.502   | 8.312   | 0.140 | -2.840 | 0.010 | 0.036 |
| FBgn0032105 | 19.755   | 34.657   | 4.854   | 0.140 | -2.836 | 0.000 | 0.001 |
| FBgn0030163 | 448.576  | 786.698  | 110.454 | 0.140 | -2.832 | 0.000 | 0.000 |
| FBgn0263047 | 19.173   | 33.626   | 4.721   | 0.140 | -2.832 | 0.000 | 0.000 |
| FBgn0051133 | 73.317   | 128.513  | 18.121  | 0.141 | -2.826 | 0.000 | 0.000 |
| FBgn0040102 | 261.449  | 458.128  | 64.769  | 0.141 | -2.822 | 0.000 | 0.000 |
| FBgn0040466 | 606.593  | 1062.807 | 150.379 | 0.141 | -2.821 | 0.000 | 0.000 |
| FBgn0262115 | 400.885  | 702.056  | 99.713  | 0.142 | -2.816 | 0.000 | 0.000 |
| FBgn0029507 | 548.422  | 959.888  | 136.956 | 0.143 | -2.809 | 0.000 | 0.000 |
| FBgn0259982 | 80.655   | 141.161  | 20.149  | 0.143 | -2.809 | 0.000 | 0.000 |
| FBgn0004118 | 398.802  | 697.858  | 99.745  | 0.143 | -2.807 | 0.000 | 0.000 |
| FBgn0263385 | 9.547    | 16.701   | 2.394   | 0.143 | -2.803 | 0.002 | 0.011 |
| FBgn0032246 | 728.375  | 1274.012 | 182.739 | 0.143 | -2.802 | 0.000 | 0.000 |
| FBgn0015562 | 178.969  | 313.018  | 44.920  | 0.144 | -2.801 | 0.000 | 0.000 |
| FBgn0051460 | 107.008  | 187.085  | 26.932  | 0.144 | -2.796 | 0.000 | 0.000 |
| FBgn0029523 | 58.785   | 102.775  | 14.796  | 0.144 | -2.796 | 0.000 | 0.000 |
| FBgn0000239 | 1530.252 | 2675.013 | 385.491 | 0.144 | -2.795 | 0.000 | 0.000 |
| FBgn0037384 | 98.540   | 172.211  | 24.870  | 0.144 | -2.792 | 0.000 | 0.000 |
| FBgn0028523 | 205.199  | 358.599  | 51.799  | 0.144 | -2.791 | 0.000 | 0.000 |
| FBgn0038213 | 7.221    | 12.614   | 1.829   | 0.145 | -2.786 | 0.011 | 0.039 |
| FBgn0052364 | 9.419    | 16.444   | 2.394   | 0.146 | -2.780 | 0.011 | 0.038 |
| FBgn0034833 | 9.144    | 15.960   | 2.327   | 0.146 | -2.778 | 0.010 | 0.036 |
| FBgn0031367 | 18.013   | 31.437   | 4.589   | 0.146 | -2.776 | 0.002 | 0.010 |
| FBgn0030723 | 285.665  | 498.416  | 72.914  | 0.146 | -2.773 | 0.000 | 0.000 |

|             |           |           |          |       |        |       |       |
|-------------|-----------|-----------|----------|-------|--------|-------|-------|
| FBgn0030259 | 691.177   | 1205.871  | 176.483  | 0.146 | -2.772 | 0.000 | 0.000 |
| FBgn0015714 | 1222.408  | 2132.253  | 312.563  | 0.147 | -2.770 | 0.000 | 0.001 |
| FBgn0004419 | 432.248   | 753.913   | 110.583  | 0.147 | -2.769 | 0.000 | 0.000 |
| FBgn0040928 | 11.293    | 19.694    | 2.893    | 0.147 | -2.767 | 0.004 | 0.017 |
| FBgn0011692 | 11.552    | 20.144    | 2.959    | 0.147 | -2.767 | 0.007 | 0.026 |
| FBgn0029172 | 205.448   | 358.264   | 52.633   | 0.147 | -2.767 | 0.000 | 0.000 |
| FBgn0030159 | 3419.721  | 5963.164  | 876.278  | 0.147 | -2.767 | 0.000 | 0.000 |
| FBgn0039323 | 31.295    | 54.544    | 8.047    | 0.148 | -2.761 | 0.000 | 0.000 |
| FBgn0261373 | 161.742   | 281.890   | 41.595   | 0.148 | -2.761 | 0.000 | 0.001 |
| FBgn0050096 | 11.762    | 20.498    | 3.025    | 0.148 | -2.760 | 0.002 | 0.008 |
| FBgn0036029 | 16.140    | 28.124    | 4.156    | 0.148 | -2.759 | 0.000 | 0.003 |
| FBgn0262647 | 230.967   | 402.416   | 59.517   | 0.148 | -2.757 | 0.000 | 0.000 |
| FBgn0051156 | 187.989   | 327.468   | 48.511   | 0.148 | -2.755 | 0.000 | 0.000 |
| FBgn0250753 | 2713.458  | 4725.888  | 701.028  | 0.148 | -2.753 | 0.000 | 0.000 |
| FBgn0039371 | 15.235    | 26.513    | 3.957    | 0.149 | -2.744 | 0.002 | 0.010 |
| FBgn0038627 | 156.248   | 271.766   | 40.730   | 0.150 | -2.738 | 0.000 | 0.000 |
| FBgn0026309 | 108.088   | 187.982   | 28.195   | 0.150 | -2.737 | 0.000 | 0.000 |
| FBgn0264501 | 33.637    | 58.497    | 8.776    | 0.150 | -2.737 | 0.000 | 0.000 |
| FBgn0036000 | 114.046   | 198.303   | 29.790   | 0.150 | -2.735 | 0.000 | 0.000 |
| FBgn0036210 | 117.838   | 204.821   | 30.854   | 0.151 | -2.731 | 0.000 | 0.000 |
| FBgn0042177 | 208.725   | 362.790   | 54.660   | 0.151 | -2.731 | 0.000 | 0.000 |
| FBgn0031695 | 41.845    | 72.719    | 10.971   | 0.151 | -2.729 | 0.000 | 0.000 |
| FBgn0000279 | 190.674   | 331.241   | 50.106   | 0.151 | -2.725 | 0.010 | 0.034 |
| FBgn0011771 | 437.683   | 760.264   | 115.103  | 0.151 | -2.724 | 0.000 | 0.000 |
| FBgn0054008 | 27.516    | 47.784    | 7.248    | 0.152 | -2.721 | 0.000 | 0.001 |
| FBgn0040606 | 27141.433 | 47129.806 | 7153.061 | 0.152 | -2.720 | 0.000 | 0.001 |
| FBgn0040514 | 22.443    | 38.967    | 5.918    | 0.152 | -2.719 | 0.000 | 0.000 |
| FBgn0022213 | 203.729   | 353.660   | 53.798   | 0.152 | -2.717 | 0.000 | 0.000 |
| FBgn0052278 | 989.803   | 1717.925  | 261.681  | 0.152 | -2.715 | 0.000 | 0.000 |
| FBgn0263408 | 43.998    | 76.292    | 11.704   | 0.153 | -2.705 | 0.000 | 0.000 |
| FBgn0035640 | 14.850    | 25.742    | 3.957    | 0.154 | -2.702 | 0.002 | 0.010 |
| FBgn0036889 | 252.766   | 437.936   | 67.595   | 0.154 | -2.696 | 0.000 | 0.000 |
| FBgn0004552 | 10.568    | 18.309    | 2.826    | 0.154 | -2.695 | 0.009 | 0.031 |
| FBgn0035443 | 73.070    | 126.522   | 19.618   | 0.155 | -2.689 | 0.000 | 0.000 |

|             |          |          |         |       |        |       |       |
|-------------|----------|----------|---------|-------|--------|-------|-------|
| FBgn0261839 | 12.879   | 22.299   | 3.458   | 0.155 | -2.689 | 0.003 | 0.012 |
| FBgn0030562 | 135.183  | 234.057  | 36.308  | 0.155 | -2.688 | 0.000 | 0.001 |
| FBgn0025456 | 263.598  | 456.376  | 70.820  | 0.155 | -2.688 | 0.000 | 0.000 |
| FBgn0039153 | 107.119  | 185.376  | 28.862  | 0.156 | -2.683 | 0.000 | 0.000 |
| FBgn0033222 | 9.372    | 16.217   | 2.526   | 0.156 | -2.682 | 0.007 | 0.027 |
| FBgn0029128 | 54.501   | 94.307   | 14.695  | 0.156 | -2.682 | 0.000 | 0.000 |
| FBgn0040780 | 70.873   | 122.595  | 19.151  | 0.156 | -2.678 | 0.000 | 0.000 |
| FBgn0040582 | 1465.820 | 2534.881 | 396.759 | 0.157 | -2.676 | 0.000 | 0.001 |
| FBgn0038429 | 139.148  | 240.627  | 37.670  | 0.157 | -2.675 | 0.000 | 0.000 |
| FBgn0031284 | 229.631  | 397.016  | 62.246  | 0.157 | -2.673 | 0.001 | 0.005 |
| FBgn0032916 | 11.118   | 19.210   | 3.025   | 0.157 | -2.667 | 0.006 | 0.024 |
| FBgn0037620 | 20.636   | 35.654   | 5.618   | 0.158 | -2.666 | 0.000 | 0.001 |
| FBgn0025874 | 188.288  | 325.309  | 51.268  | 0.158 | -2.666 | 0.000 | 0.000 |
| FBgn0045073 | 477.263  | 824.495  | 130.031 | 0.158 | -2.665 | 0.000 | 0.000 |
| FBgn0035537 | 19.634   | 33.916   | 5.353   | 0.158 | -2.664 | 0.009 | 0.032 |
| FBgn0032052 | 179.309  | 309.639  | 48.978  | 0.158 | -2.660 | 0.003 | 0.014 |
| FBgn0259896 | 302.371  | 521.922  | 82.821  | 0.159 | -2.656 | 0.000 | 0.000 |
| FBgn0000146 | 11.279   | 19.467   | 3.092   | 0.159 | -2.654 | 0.002 | 0.008 |
| FBgn0034054 | 133.839  | 230.905  | 36.773  | 0.159 | -2.651 | 0.000 | 0.000 |
| FBgn0033475 | 42.192   | 72.782   | 11.603  | 0.159 | -2.649 | 0.000 | 0.000 |
| FBgn0263406 | 15.353   | 26.483   | 4.222   | 0.159 | -2.649 | 0.003 | 0.011 |
| FBgn0036290 | 274.466  | 473.423  | 75.510  | 0.159 | -2.648 | 0.000 | 0.000 |
| FBgn0003089 | 6.158    | 10.619   | 1.696   | 0.160 | -2.647 | 0.010 | 0.034 |
| FBgn0031936 | 189.546  | 326.794  | 52.298  | 0.160 | -2.644 | 0.000 | 0.000 |
| FBgn0023000 | 107.935  | 186.079  | 29.790  | 0.160 | -2.643 | 0.000 | 0.000 |
| FBgn0260468 | 10.682   | 18.406   | 2.959   | 0.161 | -2.637 | 0.008 | 0.031 |
| FBgn0003141 | 664.205  | 1144.347 | 184.062 | 0.161 | -2.636 | 0.000 | 0.000 |
| FBgn0033450 | 25.890   | 44.598   | 7.181   | 0.161 | -2.635 | 0.000 | 0.000 |
| FBgn0027360 | 22.382   | 38.546   | 6.218   | 0.161 | -2.632 | 0.000 | 0.003 |
| FBgn0000055 | 414.233  | 713.130  | 115.336 | 0.162 | -2.628 | 0.000 | 0.000 |
| FBgn0034438 | 121.454  | 209.060  | 33.848  | 0.162 | -2.627 | 0.000 | 0.001 |
| FBgn0025697 | 629.146  | 1082.747 | 175.545 | 0.162 | -2.625 | 0.000 | 0.000 |
| FBgn0023096 | 53.380   | 91.832   | 14.928  | 0.163 | -2.621 | 0.000 | 0.000 |
| FBgn0033021 | 533.363  | 916.945  | 149.782 | 0.163 | -2.614 | 0.000 | 0.000 |

|             |          |          |          |       |        |       |       |
|-------------|----------|----------|----------|-------|--------|-------|-------|
| FBgn0037778 | 138.492  | 238.048  | 38.936   | 0.164 | -2.612 | 0.000 | 0.000 |
| FBgn0031948 | 507.902  | 872.638  | 143.165  | 0.164 | -2.608 | 0.000 | 0.000 |
| FBgn0014000 | 2301.163 | 3950.117 | 652.208  | 0.165 | -2.598 | 0.000 | 0.000 |
| FBgn0034407 | 3562.441 | 6115.170 | 1009.711 | 0.165 | -2.598 | 0.000 | 0.000 |
| FBgn0264556 | 25.099   | 43.083   | 7.115    | 0.165 | -2.598 | 0.000 | 0.001 |
| FBgn0036988 | 128.282  | 220.193  | 36.372   | 0.165 | -2.598 | 0.000 | 0.000 |
| FBgn0085216 | 46.277   | 79.419   | 13.134   | 0.165 | -2.596 | 0.000 | 0.001 |
| FBgn0032253 | 56.036   | 96.146   | 15.926   | 0.166 | -2.594 | 0.000 | 0.000 |
| FBgn0262979 | 8.420    | 14.445   | 2.394    | 0.166 | -2.593 | 0.011 | 0.037 |
| FBgn0033459 | 13.318   | 22.846   | 3.790    | 0.166 | -2.592 | 0.001 | 0.005 |
| FBgn0029121 | 79.603   | 136.531  | 22.675   | 0.166 | -2.590 | 0.000 | 0.000 |
| FBgn0039050 | 20.528   | 35.204   | 5.852    | 0.166 | -2.589 | 0.000 | 0.001 |
| FBgn0043025 | 6.174    | 10.586   | 1.762    | 0.166 | -2.587 | 0.014 | 0.046 |
| FBgn0035957 | 18.944   | 32.468   | 5.419    | 0.167 | -2.583 | 0.000 | 0.002 |
| FBgn0261402 | 113.143  | 193.900  | 32.386   | 0.167 | -2.582 | 0.000 | 0.000 |
| FBgn0030985 | 1249.009 | 2140.404 | 357.613  | 0.167 | -2.581 | 0.000 | 0.000 |
| FBgn0037513 | 846.765  | 1451.084 | 242.446  | 0.167 | -2.581 | 0.000 | 0.000 |
| FBgn0003943 | 970.892  | 1663.392 | 278.391  | 0.167 | -2.579 | 0.000 | 0.000 |
| FBgn0053095 | 272.599  | 467.001  | 78.197   | 0.167 | -2.578 | 0.000 | 0.000 |
| FBgn0262518 | 1257.992 | 2155.041 | 360.943  | 0.167 | -2.578 | 0.000 | 0.000 |
| FBgn0036959 | 49.122   | 84.146   | 14.098   | 0.168 | -2.577 | 0.000 | 0.000 |
| FBgn0030048 | 17.942   | 30.730   | 5.154    | 0.168 | -2.576 | 0.001 | 0.003 |
| FBgn0039311 | 408.135  | 698.897  | 117.373  | 0.168 | -2.574 | 0.000 | 0.000 |
| FBgn0040373 | 12.236   | 20.948   | 3.524    | 0.168 | -2.571 | 0.002 | 0.010 |
| FBgn0035791 | 293.800  | 502.749  | 84.851   | 0.169 | -2.567 | 0.000 | 0.000 |
| FBgn0032381 | 25.441   | 43.534   | 7.349    | 0.169 | -2.567 | 0.002 | 0.008 |
| FBgn0050007 | 62.069   | 106.184  | 17.954   | 0.169 | -2.564 | 0.000 | 0.000 |
| FBgn0032218 | 262.042  | 448.246  | 75.838   | 0.169 | -2.563 | 0.000 | 0.000 |
| FBgn0034177 | 60.357   | 103.225  | 17.489   | 0.169 | -2.561 | 0.000 | 0.000 |
| FBgn0036876 | 1571.914 | 2688.001 | 455.827  | 0.170 | -2.560 | 0.000 | 0.000 |
| FBgn0038292 | 48.230   | 82.463   | 13.997   | 0.170 | -2.559 | 0.000 | 0.000 |
| FBgn0032472 | 1506.214 | 2575.186 | 437.243  | 0.170 | -2.558 | 0.000 | 0.000 |
| FBgn0005655 | 74.857   | 127.970  | 21.743   | 0.170 | -2.557 | 0.000 | 0.000 |
| FBgn0053514 | 8.696    | 14.866   | 2.526    | 0.170 | -2.557 | 0.011 | 0.038 |

|             |          |          |         |       |        |       |       |
|-------------|----------|----------|---------|-------|--------|-------|-------|
| FBgn0034176 | 304.713  | 520.783  | 88.644  | 0.170 | -2.555 | 0.000 | 0.000 |
| FBgn0034511 | 822.216  | 1404.582 | 239.850 | 0.171 | -2.550 | 0.000 | 0.000 |
| FBgn0036640 | 27.997   | 47.814   | 8.179   | 0.171 | -2.547 | 0.001 | 0.006 |
| FBgn0052113 | 272.474  | 465.051  | 79.896  | 0.172 | -2.541 | 0.000 | 0.000 |
| FBgn0040805 | 159.855  | 272.831  | 46.879  | 0.172 | -2.541 | 0.000 | 0.000 |
| FBgn0033354 | 50.225   | 85.720   | 14.729  | 0.172 | -2.541 | 0.000 | 0.000 |
| FBgn0039270 | 323.619  | 552.316  | 94.923  | 0.172 | -2.541 | 0.000 | 0.000 |
| FBgn0037789 | 33.525   | 57.209   | 9.841   | 0.172 | -2.539 | 0.000 | 0.000 |
| FBgn0029506 | 1362.369 | 2324.223 | 400.514 | 0.172 | -2.537 | 0.000 | 0.000 |
| FBgn0261976 | 193.593  | 330.263  | 56.924  | 0.172 | -2.536 | 0.000 | 0.000 |
| FBgn0260744 | 1611.224 | 2748.102 | 474.346 | 0.173 | -2.534 | 0.000 | 0.000 |
| FBgn0031479 | 106.420  | 181.487  | 31.353  | 0.173 | -2.533 | 0.000 | 0.000 |
| FBgn0029710 | 104.786  | 178.617  | 30.955  | 0.173 | -2.529 | 0.000 | 0.000 |
| FBgn0033979 | 29.359   | 50.040   | 8.678   | 0.173 | -2.528 | 0.015 | 0.047 |
| FBgn0011335 | 314.696  | 536.326  | 93.065  | 0.174 | -2.527 | 0.000 | 0.000 |
| FBgn0039924 | 514.225  | 875.674  | 152.775 | 0.174 | -2.519 | 0.000 | 0.000 |
| FBgn0038608 | 8.034    | 13.675   | 2.394   | 0.175 | -2.514 | 0.010 | 0.034 |
| FBgn0038110 | 520.310  | 885.445  | 155.175 | 0.175 | -2.513 | 0.000 | 0.000 |
| FBgn0051704 | 88.966   | 151.334  | 26.597  | 0.176 | -2.508 | 0.000 | 0.000 |
| FBgn0035073 | 146.439  | 249.087  | 43.790  | 0.176 | -2.508 | 0.000 | 0.000 |
| FBgn0262598 | 15.342   | 26.096   | 4.589   | 0.176 | -2.508 | 0.001 | 0.007 |
| FBgn0039165 | 239.736  | 407.720  | 71.752  | 0.176 | -2.506 | 0.000 | 0.000 |
| FBgn0051014 | 15.325   | 26.062   | 4.589   | 0.176 | -2.506 | 0.003 | 0.013 |
| FBgn0030334 | 426.639  | 725.372  | 127.905 | 0.176 | -2.504 | 0.000 | 0.000 |
| FBgn0013563 | 171.806  | 291.977  | 51.635  | 0.177 | -2.499 | 0.000 | 0.000 |
| FBgn0052281 | 119.605  | 203.168  | 36.043  | 0.177 | -2.495 | 0.000 | 0.000 |
| FBgn0058042 | 397.783  | 675.644  | 119.922 | 0.177 | -2.494 | 0.000 | 0.000 |
| FBgn0034705 | 130.083  | 220.930  | 39.236  | 0.178 | -2.493 | 0.000 | 0.000 |
| FBgn0039315 | 24.655   | 41.863   | 7.447   | 0.178 | -2.491 | 0.000 | 0.002 |
| FBgn0052038 | 169.141  | 287.146  | 51.136  | 0.178 | -2.489 | 0.000 | 0.000 |
| FBgn0050428 | 164.642  | 279.415  | 49.869  | 0.178 | -2.486 | 0.000 | 0.000 |
| FBgn0026432 | 176.777  | 299.924  | 53.630  | 0.179 | -2.483 | 0.000 | 0.000 |
| FBgn0263336 | 99.381   | 168.570  | 30.191  | 0.179 | -2.481 | 0.000 | 0.000 |
| FBgn0039244 | 110.329  | 187.110  | 33.548  | 0.179 | -2.480 | 0.000 | 0.000 |

|             |           |           |          |       |        |       |       |
|-------------|-----------|-----------|----------|-------|--------|-------|-------|
| FBgn0032603 | 179.053   | 303.177   | 54.928   | 0.181 | -2.465 | 0.000 | 0.000 |
| FBgn0260763 | 23.396    | 39.611    | 7.181    | 0.181 | -2.464 | 0.000 | 0.001 |
| FBgn0038324 | 88.864    | 150.429   | 27.298   | 0.181 | -2.462 | 0.000 | 0.000 |
| FBgn0038766 | 49.252    | 83.342    | 15.162   | 0.182 | -2.459 | 0.000 | 0.000 |
| FBgn0010173 | 667.960   | 1130.107  | 205.812  | 0.182 | -2.457 | 0.000 | 0.000 |
| FBgn0032079 | 137.041   | 231.824   | 42.258   | 0.182 | -2.456 | 0.000 | 0.000 |
| FBgn0001612 | 180.977   | 306.061   | 55.892   | 0.183 | -2.453 | 0.000 | 0.000 |
| FBgn0051658 | 15.070    | 25.485    | 4.655    | 0.183 | -2.453 | 0.003 | 0.012 |
| FBgn0033138 | 13.421    | 22.686    | 4.156    | 0.183 | -2.449 | 0.010 | 0.034 |
| FBgn0038463 | 495.959   | 837.374   | 154.544  | 0.185 | -2.438 | 0.000 | 0.000 |
| FBgn0031776 | 356.388   | 601.720   | 111.057  | 0.185 | -2.438 | 0.000 | 0.000 |
| FBgn0261241 | 217.002   | 366.140   | 67.864   | 0.185 | -2.432 | 0.000 | 0.000 |
| FBgn0036908 | 624.314   | 1053.141  | 195.487  | 0.186 | -2.430 | 0.000 | 0.000 |
| FBgn0039115 | 173.440   | 292.386   | 54.493   | 0.186 | -2.424 | 0.000 | 0.000 |
| FBgn0058198 | 21.635    | 36.454    | 6.815    | 0.187 | -2.419 | 0.000 | 0.001 |
| FBgn0243513 | 40.409    | 68.085    | 12.733   | 0.187 | -2.419 | 0.000 | 0.000 |
| FBgn0263608 | 13.179    | 22.202    | 4.156    | 0.187 | -2.417 | 0.001 | 0.003 |
| FBgn0032266 | 63.291    | 106.601   | 19.981   | 0.187 | -2.416 | 0.000 | 0.000 |
| FBgn0031419 | 29.270    | 49.296    | 9.244    | 0.188 | -2.415 | 0.000 | 0.000 |
| FBgn0037288 | 1431.937  | 2411.000  | 452.874  | 0.188 | -2.412 | 0.000 | 0.000 |
| FBgn0035975 | 1066.232  | 1795.207  | 337.257  | 0.188 | -2.412 | 0.000 | 0.000 |
| FBgn0032484 | 132.762   | 223.464   | 42.059   | 0.188 | -2.410 | 0.000 | 0.000 |
| FBgn0032845 | 301.888   | 508.016   | 95.759   | 0.188 | -2.407 | 0.000 | 0.000 |
| FBgn0029990 | 20986.363 | 35312.113 | 6660.613 | 0.189 | -2.406 | 0.000 | 0.000 |
| FBgn0030480 | 51.814    | 87.172    | 16.457   | 0.189 | -2.405 | 0.000 | 0.000 |
| FBgn0032243 | 132.296   | 222.534   | 42.059   | 0.189 | -2.404 | 0.000 | 0.000 |
| FBgn0028940 | 881.913   | 1483.413  | 280.413  | 0.189 | -2.403 | 0.000 | 0.000 |
| FBgn0035968 | 105.811   | 177.906   | 33.716   | 0.190 | -2.400 | 0.000 | 0.000 |
| FBgn0038821 | 18.356    | 30.860    | 5.852    | 0.190 | -2.399 | 0.001 | 0.004 |
| FBgn0033540 | 193.032   | 324.386   | 61.677   | 0.190 | -2.395 | 0.000 | 0.000 |
| FBgn0038765 | 57.958    | 97.396    | 18.519   | 0.190 | -2.395 | 0.000 | 0.000 |
| FBgn0039234 | 444.923   | 747.578   | 142.268  | 0.190 | -2.394 | 0.000 | 0.000 |
| FBgn0026148 | 72.953    | 122.565   | 23.341   | 0.190 | -2.393 | 0.000 | 0.000 |
| FBgn0027584 | 670.853   | 1126.951  | 214.756  | 0.191 | -2.392 | 0.000 | 0.000 |

|             |          |           |          |       |        |       |       |
|-------------|----------|-----------|----------|-------|--------|-------|-------|
| FBgn0002873 | 21.040   | 35.330    | 6.749    | 0.191 | -2.388 | 0.001 | 0.004 |
| FBgn0030157 | 2108.192 | 3539.815  | 676.568  | 0.191 | -2.387 | 0.000 | 0.000 |
| FBgn0036770 | 355.015  | 596.081   | 113.949  | 0.191 | -2.387 | 0.000 | 0.000 |
| FBgn0039897 | 433.393  | 727.113   | 139.673  | 0.192 | -2.380 | 0.001 | 0.006 |
| FBgn0039485 | 81.235   | 136.270   | 26.199   | 0.192 | -2.379 | 0.000 | 0.000 |
| FBgn0086558 | 5590.140 | 9369.748  | 1810.533 | 0.193 | -2.372 | 0.000 | 0.000 |
| FBgn0039312 | 256.518  | 429.915   | 83.121   | 0.193 | -2.371 | 0.000 | 0.000 |
| FBgn0039945 | 130.204  | 218.182   | 42.227   | 0.194 | -2.369 | 0.002 | 0.009 |
| FBgn0264510 | 13.019   | 21.815    | 4.222    | 0.194 | -2.369 | 0.008 | 0.029 |
| FBgn0037108 | 623.963  | 1045.466  | 202.461  | 0.194 | -2.368 | 0.000 | 0.000 |
| FBgn0035703 | 100.925  | 169.066   | 32.784   | 0.194 | -2.367 | 0.000 | 0.000 |
| FBgn0032955 | 1021.113 | 1709.803  | 332.422  | 0.194 | -2.363 | 0.000 | 0.000 |
| FBgn0025806 | 259.755  | 434.895   | 84.615   | 0.195 | -2.362 | 0.000 | 0.000 |
| FBgn0003041 | 133.159  | 222.895   | 43.424   | 0.195 | -2.360 | 0.000 | 0.000 |
| FBgn0034452 | 133.690  | 223.758   | 43.623   | 0.195 | -2.359 | 0.000 | 0.000 |
| FBgn0031232 | 65.309   | 109.303   | 21.314   | 0.195 | -2.358 | 0.000 | 0.000 |
| FBgn0015336 | 12.890   | 21.558    | 4.222    | 0.196 | -2.352 | 0.003 | 0.012 |
| FBgn0039908 | 1812.959 | 3030.515  | 595.403  | 0.196 | -2.348 | 0.000 | 0.000 |
| FBgn0036906 | 113.883  | 190.330   | 37.436   | 0.197 | -2.346 | 0.000 | 0.000 |
| FBgn0037490 | 80.290   | 134.115   | 26.465   | 0.197 | -2.341 | 0.000 | 0.000 |
| FBgn0026393 | 146.121  | 244.062   | 48.180   | 0.197 | -2.341 | 0.000 | 0.001 |
| FBgn0035977 | 147.237  | 245.897   | 48.578   | 0.198 | -2.340 | 0.000 | 0.000 |
| FBgn0037548 | 92.890   | 155.093   | 30.687   | 0.198 | -2.337 | 0.000 | 0.000 |
| FBgn0033981 | 224.521  | 374.869   | 74.174   | 0.198 | -2.337 | 0.000 | 0.000 |
| FBgn0035760 | 60.172   | 100.460   | 19.883   | 0.198 | -2.337 | 0.000 | 0.001 |
| FBgn0050062 | 33.305   | 55.605    | 11.006   | 0.198 | -2.337 | 0.000 | 0.000 |
| FBgn0029765 | 1527.198 | 2547.620  | 506.775  | 0.199 | -2.330 | 0.000 | 0.000 |
| FBgn0050051 | 32.433   | 54.094    | 10.772   | 0.199 | -2.328 | 0.000 | 0.000 |
| FBgn0034631 | 115.439  | 192.507   | 38.371   | 0.199 | -2.327 | 0.000 | 0.000 |
| FBgn0052040 | 30.266   | 50.457    | 10.074   | 0.200 | -2.324 | 0.000 | 0.001 |
| FBgn0051643 | 98.137   | 163.590   | 32.683   | 0.200 | -2.323 | 0.000 | 0.000 |
| FBgn0030744 | 251.080  | 418.205   | 83.954   | 0.201 | -2.317 | 0.000 | 0.000 |
| FBgn0004435 | 8374.912 | 13947.018 | 2802.806 | 0.201 | -2.315 | 0.000 | 0.000 |
| FBgn0015926 | 19.152   | 31.887    | 6.417    | 0.201 | -2.313 | 0.003 | 0.014 |

|             |          |          |         |       |        |       |       |
|-------------|----------|----------|---------|-------|--------|-------|-------|
| FBgn0034321 | 43.724   | 72.786   | 14.663  | 0.201 | -2.311 | 0.000 | 0.000 |
| FBgn0003701 | 17.842   | 29.699   | 5.985   | 0.202 | -2.311 | 0.003 | 0.011 |
| FBgn0026257 | 28.906   | 48.105   | 9.708   | 0.202 | -2.309 | 0.000 | 0.000 |
| FBgn0034050 | 302.222  | 502.932  | 101.513 | 0.202 | -2.309 | 0.000 | 0.000 |
| FBgn0032217 | 173.779  | 289.107  | 58.450  | 0.202 | -2.306 | 0.000 | 0.000 |
| FBgn0051159 | 125.884  | 209.410  | 42.359  | 0.202 | -2.306 | 0.000 | 0.000 |
| FBgn0038252 | 25.672   | 42.700   | 8.644   | 0.202 | -2.305 | 0.000 | 0.003 |
| FBgn0039684 | 15.643   | 25.999   | 5.287   | 0.203 | -2.298 | 0.000 | 0.001 |
| FBgn0261387 | 291.428  | 484.176  | 98.681  | 0.204 | -2.295 | 0.000 | 0.000 |
| FBgn0050491 | 280.623  | 466.220  | 95.027  | 0.204 | -2.295 | 0.000 | 0.000 |
| FBgn0036356 | 102.743  | 170.640  | 34.846  | 0.204 | -2.292 | 0.000 | 0.000 |
| FBgn0041087 | 306.047  | 508.061  | 104.034 | 0.205 | -2.288 | 0.000 | 0.000 |
| FBgn0260962 | 494.427  | 820.614  | 168.240 | 0.205 | -2.286 | 0.000 | 0.000 |
| FBgn0052055 | 10.613   | 17.568   | 3.657   | 0.208 | -2.264 | 0.014 | 0.046 |
| FBgn0016983 | 899.020  | 1488.182 | 309.857 | 0.208 | -2.264 | 0.000 | 0.000 |
| FBgn0034726 | 315.839  | 522.618  | 109.061 | 0.209 | -2.261 | 0.001 | 0.003 |
| FBgn0065098 | 2514.851 | 4158.942 | 870.761 | 0.209 | -2.256 | 0.000 | 0.000 |
| FBgn0038545 | 147.281  | 243.556  | 51.006  | 0.209 | -2.256 | 0.001 | 0.006 |
| FBgn0030693 | 478.327  | 790.911  | 165.742 | 0.210 | -2.255 | 0.000 | 0.000 |
| FBgn0033834 | 13.412   | 22.169   | 4.655   | 0.210 | -2.252 | 0.010 | 0.034 |
| FBgn0083027 | 114.724  | 189.615  | 39.833  | 0.210 | -2.251 | 0.000 | 0.000 |
| FBgn0011660 | 97.525   | 161.171  | 33.880  | 0.210 | -2.250 | 0.000 | 0.000 |
| FBgn0000351 | 24.108   | 39.838   | 8.378   | 0.210 | -2.249 | 0.000 | 0.001 |
| FBgn0033757 | 397.699  | 656.647  | 138.750 | 0.211 | -2.243 | 0.000 | 0.000 |
| FBgn0031999 | 247.209  | 408.137  | 86.282  | 0.211 | -2.242 | 0.000 | 0.000 |
| FBgn0037687 | 225.985  | 372.903  | 79.066  | 0.212 | -2.238 | 0.000 | 0.000 |
| FBgn0039298 | 694.576  | 1145.677 | 243.476 | 0.213 | -2.234 | 0.000 | 0.000 |
| FBgn0037756 | 653.300  | 1077.577 | 229.024 | 0.213 | -2.234 | 0.000 | 0.000 |
| FBgn0261530 | 301.007  | 496.455  | 105.559 | 0.213 | -2.234 | 0.000 | 0.000 |
| FBgn0024698 | 110.076  | 181.449  | 38.702  | 0.213 | -2.229 | 0.000 | 0.000 |
| FBgn0039874 | 113.539  | 187.081  | 39.997  | 0.214 | -2.226 | 0.000 | 0.000 |
| FBgn0032956 | 799.073  | 1316.357 | 281.789 | 0.214 | -2.224 | 0.000 | 0.000 |
| FBgn0031213 | 478.397  | 787.960  | 168.834 | 0.214 | -2.223 | 0.000 | 0.000 |
| FBgn0261403 | 509.453  | 838.933  | 179.973 | 0.215 | -2.221 | 0.000 | 0.000 |



|             |          |          |          |       |        |       |       |
|-------------|----------|----------|----------|-------|--------|-------|-------|
| FBgn0038788 | 755.105  | 1243.281 | 266.930  | 0.215 | -2.220 | 0.000 | 0.000 |
| FBgn0051864 | 17.102   | 28.154   | 6.051    | 0.215 | -2.218 | 0.002 | 0.008 |
| FBgn0259152 | 217.370  | 357.802  | 76.937   | 0.215 | -2.217 | 0.000 | 0.000 |
| FBgn0031881 | 219.836  | 361.838  | 77.834   | 0.215 | -2.217 | 0.000 | 0.000 |
| FBgn0032704 | 1999.187 | 3290.073 | 708.300  | 0.215 | -2.216 | 0.000 | 0.000 |
| FBgn0034972 | 150.666  | 247.803  | 53.529   | 0.216 | -2.211 | 0.000 | 0.000 |
| FBgn0010389 | 327.999  | 539.464  | 116.533  | 0.216 | -2.211 | 0.000 | 0.000 |
| FBgn0003353 | 613.528  | 1008.684 | 218.372  | 0.216 | -2.208 | 0.000 | 0.000 |
| FBgn0027578 | 836.055  | 1374.174 | 297.937  | 0.217 | -2.205 | 0.000 | 0.000 |
| FBgn0083123 | 265.327  | 436.097  | 94.556   | 0.217 | -2.205 | 0.000 | 0.000 |
| FBgn0029167 | 3540.655 | 5818.347 | 1262.963 | 0.217 | -2.204 | 0.000 | 0.000 |
| FBgn0034541 | 28.609   | 47.010   | 10.207   | 0.217 | -2.203 | 0.000 | 0.001 |
| FBgn0036121 | 316.555  | 520.162  | 112.949  | 0.217 | -2.203 | 0.000 | 0.000 |
| FBgn0029664 | 467.037  | 767.369  | 166.706  | 0.217 | -2.203 | 0.000 | 0.000 |
| FBgn0033608 | 1588.395 | 2609.314 | 567.476  | 0.217 | -2.201 | 0.001 | 0.005 |
| FBgn0026060 | 123.179  | 202.334  | 44.024   | 0.218 | -2.200 | 0.000 | 0.000 |
| FBgn0033755 | 514.484  | 844.774  | 184.195  | 0.218 | -2.197 | 0.000 | 0.000 |
| FBgn0027103 | 367.543  | 603.388  | 131.698  | 0.218 | -2.196 | 0.000 | 0.000 |
| FBgn0013772 | 100.751  | 165.392  | 36.109   | 0.218 | -2.195 | 0.000 | 0.000 |
| FBgn0037338 | 84.081   | 138.005  | 30.157   | 0.219 | -2.194 | 0.000 | 0.000 |
| FBgn0003023 | 16.491   | 27.064   | 5.918    | 0.219 | -2.193 | 0.009 | 0.033 |
| FBgn0033086 | 756.218  | 1240.866 | 271.570  | 0.219 | -2.192 | 0.000 | 0.000 |
| FBgn0038421 | 503.828  | 826.252  | 181.403  | 0.220 | -2.187 | 0.000 | 0.000 |
| FBgn0047133 | 70.135   | 115.002  | 25.268   | 0.220 | -2.186 | 0.001 | 0.006 |
| FBgn0262563 | 891.948  | 1462.224 | 321.671  | 0.220 | -2.185 | 0.003 | 0.012 |
| FBgn0029856 | 168.760  | 276.639  | 60.881   | 0.220 | -2.184 | 0.000 | 0.001 |
| FBgn0051108 | 172.408  | 282.609  | 62.208   | 0.220 | -2.184 | 0.000 | 0.000 |
| FBgn0037583 | 86.753   | 142.188  | 31.319   | 0.220 | -2.183 | 0.000 | 0.000 |
| FBgn0037371 | 211.994  | 347.452  | 76.536   | 0.220 | -2.183 | 0.000 | 0.000 |
| FBgn0029733 | 21.992   | 36.037   | 7.946    | 0.220 | -2.181 | 0.001 | 0.006 |
| FBgn0261815 | 71.190   | 116.547  | 25.833   | 0.222 | -2.174 | 0.000 | 0.000 |
| FBgn0264427 | 20.230   | 33.112   | 7.349    | 0.222 | -2.172 | 0.002 | 0.010 |
| FBgn0033557 | 156.008  | 255.262  | 56.754   | 0.222 | -2.169 | 0.000 | 0.000 |
| FBgn0032790 | 153.906  | 251.819  | 55.993   | 0.222 | -2.169 | 0.000 | 0.000 |

|             |          |          |          |       |        |       |       |
|-------------|----------|----------|----------|-------|--------|-------|-------|
| FBgn0036579 | 395.970  | 647.468  | 144.472  | 0.223 | -2.164 | 0.000 | 0.000 |
| FBgn0027521 | 20.635   | 33.722   | 7.548    | 0.224 | -2.160 | 0.005 | 0.018 |
| FBgn0037046 | 71.191   | 116.316  | 26.067   | 0.224 | -2.158 | 0.000 | 0.000 |
| FBgn0086251 | 94.109   | 153.738  | 34.480   | 0.224 | -2.157 | 0.000 | 0.000 |
| FBgn0033113 | 52.437   | 85.657   | 19.217   | 0.224 | -2.156 | 0.000 | 0.000 |
| FBgn0036581 | 283.220  | 462.505  | 103.936  | 0.225 | -2.154 | 0.000 | 0.000 |
| FBgn0037755 | 717.472  | 1171.170 | 263.775  | 0.225 | -2.151 | 0.000 | 0.000 |
| FBgn0037435 | 94.534   | 154.289  | 34.780   | 0.225 | -2.149 | 0.000 | 0.000 |
| FBgn0028562 | 34.263   | 55.891   | 12.635   | 0.226 | -2.145 | 0.000 | 0.001 |
| FBgn0031548 | 32.434   | 52.899   | 11.969   | 0.226 | -2.144 | 0.000 | 0.000 |
| FBgn0023541 | 113.554  | 185.149  | 41.958   | 0.227 | -2.142 | 0.000 | 0.000 |
| FBgn0039462 | 30.135   | 49.132   | 11.139   | 0.227 | -2.141 | 0.001 | 0.007 |
| FBgn0033348 | 40.026   | 65.256   | 14.796   | 0.227 | -2.141 | 0.000 | 0.000 |
| FBgn0039609 | 661.430  | 1078.273 | 244.586  | 0.227 | -2.140 | 0.000 | 0.000 |
| FBgn0050476 | 244.855  | 399.140  | 90.570   | 0.227 | -2.140 | 0.000 | 0.000 |
| FBgn0036225 | 56.390   | 91.899   | 20.881   | 0.227 | -2.138 | 0.000 | 0.000 |
| FBgn0033395 | 39.232   | 63.935   | 14.530   | 0.227 | -2.138 | 0.000 | 0.001 |
| FBgn0262526 | 23.760   | 38.710   | 8.811    | 0.228 | -2.135 | 0.002 | 0.011 |
| FBgn0004240 | 2713.347 | 4419.591 | 1007.103 | 0.228 | -2.134 | 0.001 | 0.003 |
| FBgn0037489 | 224.572  | 365.623  | 83.522   | 0.228 | -2.130 | 0.000 | 0.000 |
| FBgn0027052 | 173.711  | 282.423  | 65.000   | 0.230 | -2.119 | 0.000 | 0.000 |
| FBgn0062978 | 1421.674 | 2311.138 | 532.209  | 0.230 | -2.119 | 0.000 | 0.000 |
| FBgn0036839 | 29.022   | 47.170   | 10.873   | 0.231 | -2.117 | 0.000 | 0.000 |
| FBgn0032116 | 72.237   | 117.410  | 27.065   | 0.231 | -2.117 | 0.000 | 0.000 |
| FBgn0083973 | 25.899   | 42.090   | 9.708    | 0.231 | -2.116 | 0.000 | 0.002 |
| FBgn0259482 | 103.430  | 167.994  | 38.867   | 0.231 | -2.112 | 0.000 | 0.000 |
| FBgn0038654 | 149.294  | 242.362  | 56.226   | 0.232 | -2.108 | 0.000 | 0.000 |
| FBgn0034439 | 177.260  | 287.726  | 66.794   | 0.232 | -2.107 | 0.000 | 0.000 |
| FBgn0032074 | 13.661   | 22.169   | 5.154    | 0.232 | -2.105 | 0.008 | 0.030 |
| FBgn0015039 | 1211.918 | 1966.320 | 457.517  | 0.233 | -2.104 | 0.000 | 0.000 |
| FBgn0035721 | 142.561  | 231.292  | 53.829   | 0.233 | -2.103 | 0.000 | 0.000 |
| FBgn0031598 | 355.433  | 576.543  | 134.323  | 0.233 | -2.102 | 0.000 | 0.000 |
| FBgn0051371 | 43.383   | 70.340   | 16.425   | 0.234 | -2.098 | 0.000 | 0.000 |
| FBgn0037911 | 222.493  | 360.736  | 84.251   | 0.234 | -2.098 | 0.000 | 0.000 |

|             |           |           |           |       |        |       |       |
|-------------|-----------|-----------|-----------|-------|--------|-------|-------|
| FBgn0037556 | 968.967   | 1570.968  | 366.966   | 0.234 | -2.098 | 0.000 | 0.000 |
| FBgn0036615 | 253.092   | 410.329   | 95.854    | 0.234 | -2.098 | 0.000 | 0.000 |
| FBgn0039291 | 50.715    | 82.214    | 19.217    | 0.234 | -2.097 | 0.000 | 0.000 |
| FBgn0033633 | 25.706    | 41.669    | 9.743     | 0.234 | -2.097 | 0.000 | 0.002 |
| FBgn0051769 | 1892.951  | 3068.063  | 717.839   | 0.234 | -2.096 | 0.000 | 0.001 |
| FBgn0015582 | 183.586   | 297.449   | 69.724    | 0.234 | -2.093 | 0.000 | 0.000 |
| FBgn0030757 | 327.184   | 529.950   | 124.419   | 0.235 | -2.091 | 0.000 | 0.000 |
| FBgn0033996 | 338.945   | 548.553   | 129.336   | 0.236 | -2.085 | 0.000 | 0.000 |
| FBgn0037815 | 132.776   | 214.881   | 50.671    | 0.236 | -2.084 | 0.000 | 0.000 |
| FBgn0043578 | 2044.941  | 3308.582  | 781.301   | 0.236 | -2.082 | 0.000 | 0.000 |
| FBgn0033810 | 420.383   | 679.978   | 160.787   | 0.236 | -2.080 | 0.001 | 0.003 |
| FBgn0036715 | 100.467   | 162.500   | 38.434    | 0.237 | -2.080 | 0.000 | 0.000 |
| FBgn0035122 | 549.947   | 889.384   | 210.511   | 0.237 | -2.079 | 0.001 | 0.005 |
| FBgn0058378 | 41.540    | 67.154    | 15.926    | 0.237 | -2.076 | 0.000 | 0.000 |
| FBgn0034405 | 2960.266  | 4785.177  | 1135.356  | 0.237 | -2.075 | 0.000 | 0.000 |
| FBgn0039916 | 275.767   | 445.640   | 105.894   | 0.238 | -2.073 | 0.000 | 0.000 |
| FBgn0033605 | 180.768   | 291.910   | 69.626    | 0.239 | -2.068 | 0.000 | 0.000 |
| FBgn0032008 | 1388.436  | 2241.646  | 535.227   | 0.239 | -2.066 | 0.000 | 0.000 |
| FBgn0033437 | 457.480   | 738.474   | 176.486   | 0.239 | -2.065 | 0.000 | 0.000 |
| FBgn0005390 | 20.237    | 32.662    | 7.813     | 0.239 | -2.064 | 0.002 | 0.009 |
| FBgn0036790 | 124.446   | 200.778   | 48.113    | 0.240 | -2.061 | 0.000 | 0.001 |
| FBgn0031143 | 547.020   | 882.442   | 211.597   | 0.240 | -2.060 | 0.000 | 0.000 |
| FBgn0005666 | 1658.817  | 2675.623  | 642.012   | 0.240 | -2.059 | 0.000 | 0.000 |
| FBgn0051368 | 249.109   | 401.761   | 96.457    | 0.240 | -2.058 | 0.000 | 0.000 |
| FBgn0052195 | 74.133    | 119.506   | 28.761    | 0.241 | -2.055 | 0.000 | 0.000 |
| FBgn0038076 | 14.279    | 23.006    | 5.552     | 0.241 | -2.051 | 0.013 | 0.043 |
| FBgn0024491 | 406.782   | 655.389   | 158.175   | 0.241 | -2.051 | 0.000 | 0.000 |
| FBgn0052350 | 135.425   | 218.119   | 52.731    | 0.242 | -2.048 | 0.000 | 0.001 |
| FBgn0038909 | 23.039    | 37.069    | 9.010     | 0.243 | -2.041 | 0.001 | 0.007 |
| FBgn0024196 | 943.592   | 1517.955  | 369.228   | 0.243 | -2.040 | 0.000 | 0.000 |
| FBgn0011693 | 37201.922 | 59811.261 | 14592.583 | 0.244 | -2.035 | 0.000 | 0.000 |
| FBgn0037647 | 183.701   | 295.252   | 72.149    | 0.244 | -2.033 | 0.000 | 0.000 |
| FBgn0038303 | 509.317   | 818.381   | 200.254   | 0.245 | -2.031 | 0.000 | 0.000 |
| FBgn0027783 | 448.101   | 719.852   | 176.350   | 0.245 | -2.029 | 0.000 | 0.000 |

|             |          |          |         |       |        |       |       |
|-------------|----------|----------|---------|-------|--------|-------|-------|
| FBgn0002736 | 590.536  | 948.498  | 232.574 | 0.245 | -2.028 | 0.000 | 0.000 |
| FBgn0085220 | 833.162  | 1337.962 | 328.363 | 0.245 | -2.027 | 0.008 | 0.029 |
| FBgn0052803 | 424.134  | 681.083  | 167.185 | 0.245 | -2.026 | 0.000 | 0.001 |
| FBgn0264703 | 22.183   | 35.621   | 8.745   | 0.245 | -2.026 | 0.001 | 0.006 |
| FBgn0029508 | 88.262   | 141.712  | 34.812  | 0.246 | -2.025 | 0.000 | 0.000 |
| FBgn0015614 | 1694.652 | 2719.993 | 669.312 | 0.246 | -2.023 | 0.000 | 0.000 |
| FBgn0042178 | 30.132   | 48.361   | 11.903  | 0.246 | -2.023 | 0.002 | 0.007 |
| FBgn0035710 | 950.221  | 1524.533 | 375.909 | 0.247 | -2.020 | 0.000 | 0.000 |
| FBgn0032224 | 79.728   | 127.903  | 31.552  | 0.247 | -2.019 | 0.000 | 0.000 |
| FBgn0015925 | 129.922  | 208.408  | 51.436  | 0.247 | -2.019 | 0.000 | 0.000 |
| FBgn0032843 | 35.250   | 56.535   | 13.965  | 0.247 | -2.017 | 0.003 | 0.011 |
| FBgn0037634 | 54.696   | 87.715   | 21.677  | 0.247 | -2.017 | 0.000 | 0.000 |
| FBgn0024913 | 438.309  | 702.566  | 174.051 | 0.248 | -2.013 | 0.000 | 0.000 |
| FBgn0034154 | 76.442   | 122.528  | 30.355  | 0.248 | -2.013 | 0.000 | 0.000 |
| FBgn0261446 | 27.413   | 43.921   | 10.905  | 0.248 | -2.010 | 0.012 | 0.040 |
| FBgn0036627 | 116.486  | 186.593  | 46.380  | 0.249 | -2.008 | 0.000 | 0.000 |
| FBgn0031894 | 50.827   | 81.373   | 20.281  | 0.249 | -2.004 | 0.000 | 0.000 |
| FBgn0039132 | 444.605  | 711.574  | 177.636 | 0.250 | -2.002 | 0.000 | 0.000 |
| FBgn0051300 | 113.254  | 181.256  | 45.252  | 0.250 | -2.002 | 0.000 | 0.000 |
| FBgn0038889 | 235.217  | 376.439  | 93.994  | 0.250 | -2.002 | 0.000 | 0.000 |
| FBgn0011703 | 54.749   | 87.618   | 21.879  | 0.250 | -2.002 | 0.000 | 0.000 |
| FBgn0028961 | 150.674  | 241.070  | 60.278  | 0.250 | -2.000 | 0.000 | 0.000 |
| FBgn0036150 | 38.393   | 61.426   | 15.361  | 0.250 | -2.000 | 0.001 | 0.005 |
| FBgn0035623 | 46.492   | 74.364   | 18.620  | 0.250 | -1.998 | 0.001 | 0.007 |
| FBgn0031676 | 74.712   | 119.502  | 29.923  | 0.250 | -1.998 | 0.000 | 0.000 |
| FBgn0027053 | 422.090  | 674.711  | 169.469 | 0.251 | -1.993 | 0.000 | 0.000 |
| FBgn0034387 | 712.357  | 1138.556 | 286.159 | 0.251 | -1.992 | 0.000 | 0.000 |
| FBgn0262512 | 2161.403 | 3454.430 | 868.376 | 0.251 | -1.992 | 0.000 | 0.000 |
| FBgn0034076 | 54.267   | 86.722   | 21.813  | 0.252 | -1.991 | 0.001 | 0.004 |
| FBgn0085224 | 100.643  | 160.821  | 40.464  | 0.252 | -1.991 | 0.000 | 0.000 |
| FBgn0043853 | 131.119  | 209.510  | 52.728  | 0.252 | -1.990 | 0.000 | 0.000 |
| FBgn0041710 | 92.836   | 148.333  | 37.338  | 0.252 | -1.990 | 0.000 | 0.000 |
| FBgn0036433 | 556.202  | 888.512  | 223.892 | 0.252 | -1.989 | 0.000 | 0.000 |
| FBgn0027565 | 691.304  | 1103.087 | 279.522 | 0.253 | -1.981 | 0.000 | 0.000 |

|             |          |          |          |       |        |       |       |
|-------------|----------|----------|----------|-------|--------|-------|-------|
| FBgn0041579 | 4529.761 | 7226.763 | 1832.758 | 0.254 | -1.979 | 0.006 | 0.023 |
| FBgn0053126 | 628.166  | 1001.631 | 254.701  | 0.254 | -1.975 | 0.000 | 0.000 |
| FBgn0033806 | 113.084  | 180.284  | 45.884   | 0.255 | -1.974 | 0.000 | 0.000 |
| FBgn0032876 | 1040.273 | 1658.061 | 422.485  | 0.255 | -1.973 | 0.000 | 0.000 |
| FBgn0041181 | 622.144  | 991.536  | 252.751  | 0.255 | -1.972 | 0.000 | 0.000 |
| FBgn0039965 | 520.268  | 828.538  | 211.998  | 0.256 | -1.967 | 0.000 | 0.000 |
| FBgn0032251 | 27.659   | 44.047   | 11.271   | 0.256 | -1.966 | 0.006 | 0.022 |
| FBgn0033029 | 1200.868 | 1912.017 | 489.720  | 0.256 | -1.965 | 0.000 | 0.000 |
| FBgn0037045 | 204.330  | 325.309  | 83.351   | 0.256 | -1.965 | 0.000 | 0.001 |
| FBgn0051288 | 65.364   | 104.029  | 26.698   | 0.257 | -1.962 | 0.000 | 0.000 |
| FBgn0051921 | 21.557   | 34.303   | 8.811    | 0.257 | -1.961 | 0.002 | 0.011 |
| FBgn0032652 | 4741.071 | 7543.774 | 1938.369 | 0.257 | -1.960 | 0.000 | 0.000 |
| FBgn0032974 | 669.478  | 1064.959 | 273.998  | 0.257 | -1.959 | 0.000 | 0.000 |
| FBgn0053145 | 218.881  | 348.092  | 89.671   | 0.258 | -1.957 | 0.000 | 0.000 |
| FBgn0031886 | 18.576   | 29.539   | 7.614    | 0.258 | -1.956 | 0.006 | 0.024 |
| FBgn0041004 | 547.662  | 870.832  | 224.492  | 0.258 | -1.956 | 0.000 | 0.003 |
| FBgn0038195 | 1588.503 | 2524.807 | 652.200  | 0.258 | -1.953 | 0.000 | 0.000 |
| FBgn0038390 | 32.457   | 51.581   | 13.333   | 0.258 | -1.952 | 0.001 | 0.003 |
| FBgn0030641 | 92.460   | 146.915  | 38.004   | 0.259 | -1.951 | 0.001 | 0.003 |
| FBgn0037184 | 172.839  | 274.624  | 71.054   | 0.259 | -1.950 | 0.000 | 0.000 |
| FBgn0034032 | 199.096  | 316.268  | 81.924   | 0.259 | -1.949 | 0.000 | 0.000 |
| FBgn0039714 | 994.431  | 1579.381 | 409.480  | 0.259 | -1.947 | 0.000 | 0.000 |
| FBgn0032924 | 636.858  | 1011.305 | 262.411  | 0.259 | -1.946 | 0.000 | 0.000 |
| FBgn0010197 | 41.688   | 66.187   | 17.189   | 0.260 | -1.945 | 0.000 | 0.001 |
| FBgn0263738 | 238.009  | 377.869  | 98.150   | 0.260 | -1.945 | 0.000 | 0.001 |
| FBgn0051032 | 50.029   | 79.411   | 20.648   | 0.260 | -1.943 | 0.000 | 0.000 |
| FBgn0040211 | 805.458  | 1278.292 | 332.624  | 0.260 | -1.942 | 0.000 | 0.000 |
| FBgn0032398 | 866.696  | 1375.112 | 358.281  | 0.261 | -1.940 | 0.000 | 0.000 |
| FBgn0259214 | 2572.838 | 4081.587 | 1064.088 | 0.261 | -1.940 | 0.000 | 0.000 |
| FBgn0039904 | 729.944  | 1157.956 | 301.931  | 0.261 | -1.939 | 0.000 | 0.000 |
| FBgn0039004 | 161.417  | 256.040  | 66.794   | 0.261 | -1.939 | 0.000 | 0.000 |
| FBgn0262286 | 23.534   | 37.325   | 9.743    | 0.261 | -1.938 | 0.013 | 0.044 |
| FBgn0022029 | 641.102  | 1016.743 | 265.462  | 0.261 | -1.937 | 0.000 | 0.000 |
| FBgn0046878 | 277.568  | 440.166  | 114.970  | 0.261 | -1.937 | 0.000 | 0.000 |

|             |           |           |           |       |        |       |       |
|-------------|-----------|-----------|-----------|-------|--------|-------|-------|
| FBgn0051955 | 79.265    | 125.647   | 32.882    | 0.262 | -1.934 | 0.001 | 0.003 |
| FBgn0032880 | 1035.311  | 1641.120  | 429.502   | 0.262 | -1.934 | 0.000 | 0.000 |
| FBgn0038051 | 23.080    | 36.585    | 9.575     | 0.262 | -1.934 | 0.001 | 0.006 |
| FBgn0039703 | 2226.884  | 3529.608  | 924.159   | 0.262 | -1.933 | 0.000 | 0.000 |
| FBgn0031734 | 1774.620  | 2812.765  | 736.474   | 0.262 | -1.933 | 0.000 | 0.000 |
| FBgn0052438 | 198.011   | 313.763   | 82.258    | 0.262 | -1.931 | 0.000 | 0.000 |
| FBgn0038366 | 96.780    | 153.329   | 40.231    | 0.262 | -1.930 | 0.000 | 0.000 |
| FBgn0033554 | 89.313    | 141.485   | 37.142    | 0.263 | -1.930 | 0.003 | 0.012 |
| FBgn0259112 | 50.473    | 79.865    | 21.080    | 0.264 | -1.922 | 0.000 | 0.000 |
| FBgn0038484 | 41.855    | 66.224    | 17.486    | 0.264 | -1.921 | 0.015 | 0.047 |
| FBgn0028539 | 992.311   | 1569.681  | 414.940   | 0.264 | -1.919 | 0.000 | 0.000 |
| FBgn0014018 | 1194.364  | 1889.184  | 499.544   | 0.264 | -1.919 | 0.000 | 0.000 |
| FBgn0037396 | 266.989   | 422.191   | 111.786   | 0.265 | -1.917 | 0.000 | 0.000 |
| FBgn0003891 | 5015.645  | 7929.426  | 2101.864  | 0.265 | -1.916 | 0.000 | 0.000 |
| FBgn0002901 | 47.021    | 74.327    | 19.716    | 0.265 | -1.915 | 0.000 | 0.000 |
| FBgn0031678 | 26.501    | 41.863    | 11.139    | 0.266 | -1.910 | 0.001 | 0.006 |
| FBgn0016726 | 26224.574 | 41424.056 | 11025.092 | 0.266 | -1.910 | 0.000 | 0.001 |
| FBgn0039687 | 83.405    | 131.733   | 35.077    | 0.266 | -1.909 | 0.000 | 0.000 |
| FBgn0036993 | 840.843   | 1327.532  | 354.154   | 0.267 | -1.906 | 0.000 | 0.000 |
| FBgn0010424 | 162.555   | 256.617   | 68.492    | 0.267 | -1.906 | 0.000 | 0.000 |
| FBgn0013997 | 852.906   | 1346.328  | 359.484   | 0.267 | -1.905 | 0.000 | 0.000 |
| FBgn0038965 | 686.432   | 1083.365  | 289.498   | 0.267 | -1.904 | 0.000 | 0.000 |
| FBgn0035104 | 36.254    | 57.213    | 15.295    | 0.267 | -1.903 | 0.000 | 0.001 |
| FBgn0032436 | 16.862    | 26.609    | 7.115     | 0.267 | -1.903 | 0.006 | 0.024 |
| FBgn0032016 | 156.482   | 246.865   | 66.099    | 0.268 | -1.901 | 0.000 | 0.000 |
| FBgn0027620 | 553.676   | 872.678   | 234.673   | 0.269 | -1.895 | 0.000 | 0.000 |
| FBgn0027082 | 122.403   | 192.872   | 51.935    | 0.269 | -1.893 | 0.000 | 0.000 |
| FBgn0039650 | 43.335    | 68.249    | 18.421    | 0.270 | -1.889 | 0.004 | 0.018 |
| FBgn0250907 | 48.711    | 76.709    | 20.714    | 0.270 | -1.889 | 0.000 | 0.001 |
| FBgn0032015 | 579.561   | 912.583   | 246.539   | 0.270 | -1.888 | 0.000 | 0.000 |
| FBgn0041164 | 101.522   | 159.853   | 43.190    | 0.270 | -1.888 | 0.000 | 0.000 |
| FBgn0032242 | 550.774   | 867.140   | 234.408   | 0.270 | -1.887 | 0.000 | 0.000 |
| FBgn0002021 | 409.866   | 645.176   | 174.556   | 0.271 | -1.886 | 0.000 | 0.000 |
| FBgn0051495 | 53.461    | 84.079    | 22.842    | 0.272 | -1.880 | 0.000 | 0.000 |

|             |          |          |          |       |        |       |       |
|-------------|----------|----------|----------|-------|--------|-------|-------|
| FBgn0002780 | 942.286  | 1481.463 | 403.110  | 0.272 | -1.878 | 0.000 | 0.000 |
| FBgn0052856 | 144.929  | 227.849  | 62.009   | 0.272 | -1.878 | 0.000 | 0.000 |
| FBgn0028647 | 310.579  | 488.099  | 133.059  | 0.273 | -1.875 | 0.000 | 0.000 |
| FBgn0039265 | 573.015  | 900.382  | 245.648  | 0.273 | -1.874 | 0.000 | 0.000 |
| FBgn0039711 | 172.314  | 270.553  | 74.076   | 0.274 | -1.869 | 0.000 | 0.000 |
| FBgn0037022 | 239.592  | 376.149  | 103.036  | 0.274 | -1.868 | 0.000 | 0.000 |
| FBgn0037679 | 421.951  | 662.293  | 181.608  | 0.274 | -1.867 | 0.000 | 0.000 |
| FBgn0033945 | 37.992   | 59.624   | 16.359   | 0.274 | -1.866 | 0.001 | 0.003 |
| FBgn0033067 | 1222.895 | 1918.784 | 527.005  | 0.275 | -1.864 | 0.002 | 0.009 |
| FBgn0034248 | 2029.667 | 3184.457 | 874.878  | 0.275 | -1.864 | 0.000 | 0.000 |
| FBgn0038235 | 68.625   | 107.658  | 29.591   | 0.275 | -1.863 | 0.001 | 0.005 |
| FBgn0037842 | 328.234  | 514.868  | 141.599  | 0.275 | -1.862 | 0.000 | 0.001 |
| FBgn0052412 | 440.669  | 691.130  | 190.208  | 0.275 | -1.861 | 0.000 | 0.000 |
| FBgn0032780 | 51.634   | 80.960   | 22.309   | 0.276 | -1.860 | 0.000 | 0.000 |
| FBgn0032124 | 22.001   | 34.493   | 9.509    | 0.276 | -1.859 | 0.002 | 0.008 |
| FBgn0031227 | 20.689   | 32.434   | 8.944    | 0.276 | -1.859 | 0.005 | 0.020 |
| FBgn0039932 | 109.427  | 171.507  | 47.346   | 0.276 | -1.857 | 0.000 | 0.000 |
| FBgn0000592 | 3030.358 | 4748.819 | 1311.897 | 0.276 | -1.856 | 0.000 | 0.000 |
| FBgn0039630 | 24.172   | 37.872   | 10.472   | 0.277 | -1.855 | 0.004 | 0.017 |
| FBgn0051436 | 171.288  | 268.360  | 74.215   | 0.277 | -1.854 | 0.000 | 0.000 |
| FBgn0036501 | 887.226  | 1389.918 | 384.533  | 0.277 | -1.854 | 0.000 | 0.003 |
| FBgn0034527 | 298.810  | 468.048  | 129.573  | 0.277 | -1.853 | 0.000 | 0.000 |
| FBgn0034143 | 300.602  | 470.829  | 130.375  | 0.277 | -1.853 | 0.000 | 0.000 |
| FBgn0024806 | 1280.950 | 2004.630 | 557.269  | 0.278 | -1.847 | 0.000 | 0.000 |
| FBgn0019650 | 1277.429 | 1998.903 | 555.954  | 0.278 | -1.846 | 0.000 | 0.000 |
| FBgn0032198 | 1690.685 | 2645.427 | 735.944  | 0.278 | -1.846 | 0.000 | 0.000 |
| FBgn0032482 | 2272.934 | 3556.346 | 989.522  | 0.278 | -1.846 | 0.000 | 0.000 |
| FBgn0052218 | 96.012   | 150.198  | 41.826   | 0.278 | -1.844 | 0.001 | 0.007 |
| FBgn0261843 | 28.288   | 44.241   | 12.335   | 0.279 | -1.843 | 0.002 | 0.008 |
| FBgn0028992 | 349.246  | 546.175  | 152.317  | 0.279 | -1.842 | 0.000 | 0.000 |
| FBgn0039640 | 220.422  | 344.686  | 96.157   | 0.279 | -1.842 | 0.000 | 0.000 |
| FBgn0015576 | 1626.752 | 2542.755 | 710.748  | 0.280 | -1.839 | 0.000 | 0.000 |
| FBgn0263415 | 22.052   | 34.463   | 9.642    | 0.280 | -1.838 | 0.003 | 0.014 |
| FBgn0028552 | 1394.908 | 2179.213 | 610.602  | 0.280 | -1.836 | 0.000 | 0.000 |

|             |          |          |         |       |        |       |       |
|-------------|----------|----------|---------|-------|--------|-------|-------|
| FBgn0030217 | 125.588  | 196.185  | 54.992  | 0.280 | -1.835 | 0.000 | 0.000 |
| FBgn0010317 | 31.660   | 49.456   | 13.864  | 0.280 | -1.835 | 0.001 | 0.003 |
| FBgn0039326 | 95.285   | 148.843  | 41.728  | 0.280 | -1.835 | 0.000 | 0.001 |
| FBgn0015572 | 32.342   | 50.520   | 14.164  | 0.280 | -1.835 | 0.001 | 0.004 |
| FBgn0085435 | 40.249   | 62.840   | 17.657  | 0.281 | -1.831 | 0.003 | 0.013 |
| FBgn0001234 | 1632.023 | 2548.049 | 715.997 | 0.281 | -1.831 | 0.000 | 0.000 |
| FBgn0000147 | 78.538   | 122.565  | 34.512  | 0.282 | -1.828 | 0.000 | 0.000 |
| FBgn0036101 | 91.612   | 142.962  | 40.262  | 0.282 | -1.828 | 0.000 | 0.000 |
| FBgn0032683 | 218.777  | 341.399  | 96.154  | 0.282 | -1.828 | 0.000 | 0.000 |
| FBgn0034689 | 564.071  | 880.141  | 248.001 | 0.282 | -1.827 | 0.000 | 0.000 |
| FBgn0011802 | 83.477   | 130.248  | 36.706  | 0.282 | -1.827 | 0.001 | 0.004 |
| FBgn0038972 | 351.969  | 549.138  | 154.800 | 0.282 | -1.827 | 0.000 | 0.000 |
| FBgn0026620 | 2033.356 | 3172.129 | 894.583 | 0.282 | -1.826 | 0.000 | 0.000 |
| FBgn0034008 | 143.497  | 223.754  | 63.240  | 0.283 | -1.823 | 0.000 | 0.000 |
| FBgn0037028 | 1432.679 | 2233.548 | 631.811 | 0.283 | -1.822 | 0.000 | 0.000 |
| FBgn0051739 | 694.597  | 1082.181 | 307.013 | 0.284 | -1.818 | 0.000 | 0.000 |
| FBgn0032168 | 187.191  | 291.292  | 83.089  | 0.285 | -1.810 | 0.000 | 0.000 |
| FBgn0037012 | 78.378   | 121.914  | 34.843  | 0.286 | -1.807 | 0.000 | 0.000 |
| FBgn0040011 | 510.915  | 794.435  | 227.394 | 0.286 | -1.805 | 0.000 | 0.000 |
| FBgn0035842 | 98.670   | 153.418  | 43.923  | 0.286 | -1.804 | 0.000 | 0.000 |
| FBgn0001086 | 27.161   | 42.220   | 12.102  | 0.287 | -1.803 | 0.008 | 0.030 |
| FBgn0259247 | 139.639  | 217.036  | 62.243  | 0.287 | -1.802 | 0.000 | 0.000 |
| FBgn0260460 | 384.874  | 598.151  | 171.597 | 0.287 | -1.801 | 0.000 | 0.000 |
| FBgn0032387 | 18.329   | 28.478   | 8.179   | 0.287 | -1.800 | 0.005 | 0.019 |
| FBgn0038419 | 16.465   | 25.582   | 7.349   | 0.287 | -1.800 | 0.015 | 0.048 |
| FBgn0039907 | 1188.139 | 1844.602 | 531.675 | 0.288 | -1.795 | 0.000 | 0.000 |
| FBgn0038772 | 81.347   | 126.287  | 36.406  | 0.288 | -1.794 | 0.001 | 0.005 |
| FBgn0033762 | 675.159  | 1047.625 | 302.693 | 0.289 | -1.791 | 0.000 | 0.000 |
| FBgn0036462 | 352.857  | 547.314  | 158.400 | 0.289 | -1.789 | 0.000 | 0.000 |
| FBgn0033031 | 212.753  | 329.980  | 95.525  | 0.289 | -1.788 | 0.001 | 0.004 |
| FBgn0263110 | 1916.108 | 2971.074 | 861.142 | 0.290 | -1.787 | 0.000 | 0.000 |
| FBgn0035213 | 377.778  | 585.689  | 169.867 | 0.290 | -1.786 | 0.000 | 0.000 |
| FBgn0039637 | 1278.860 | 1982.176 | 575.544 | 0.290 | -1.784 | 0.000 | 0.000 |
| FBgn0039111 | 197.074  | 305.399  | 88.748  | 0.291 | -1.783 | 0.000 | 0.001 |



|             |          |          |          |       |        |       |       |
|-------------|----------|----------|----------|-------|--------|-------|-------|
| FBgn0011829 | 56.917   | 88.166   | 25.669   | 0.291 | -1.780 | 0.000 | 0.001 |
| FBgn0038960 | 18.265   | 28.284   | 8.246    | 0.292 | -1.778 | 0.011 | 0.038 |
| FBgn0037000 | 111.779  | 173.019  | 50.539   | 0.292 | -1.775 | 0.003 | 0.012 |
| FBgn0033186 | 68.102   | 105.284  | 30.921   | 0.294 | -1.768 | 0.000 | 0.000 |
| FBgn0262904 | 19.677   | 30.410   | 8.944    | 0.294 | -1.766 | 0.006 | 0.024 |
| FBgn0038013 | 172.642  | 266.778  | 78.506   | 0.294 | -1.765 | 0.001 | 0.004 |
| FBgn0037763 | 106.872  | 165.131  | 48.612   | 0.294 | -1.764 | 0.003 | 0.014 |
| FBgn0052076 | 240.117  | 370.949  | 109.285  | 0.295 | -1.763 | 0.000 | 0.000 |
| FBgn0038207 | 10.956   | 16.924   | 4.987    | 0.295 | -1.763 | 0.011 | 0.038 |
| FBgn0038681 | 1097.520 | 1695.279 | 499.760  | 0.295 | -1.762 | 0.000 | 0.000 |
| FBgn0033924 | 1092.312 | 1687.125 | 497.499  | 0.295 | -1.762 | 0.000 | 0.000 |
| FBgn0062412 | 49.532   | 76.489   | 22.574   | 0.295 | -1.761 | 0.003 | 0.014 |
| FBgn0035598 | 35.461   | 54.730   | 16.192   | 0.296 | -1.757 | 0.002 | 0.009 |
| FBgn0034602 | 337.456  | 520.775  | 154.137  | 0.296 | -1.756 | 0.000 | 0.000 |
| FBgn0020392 | 313.753  | 484.001  | 143.506  | 0.296 | -1.754 | 0.000 | 0.000 |
| FBgn0036436 | 111.625  | 172.181  | 51.069   | 0.297 | -1.753 | 0.000 | 0.000 |
| FBgn0039930 | 823.942  | 1270.696 | 377.188  | 0.297 | -1.752 | 0.000 | 0.000 |
| FBgn0263974 | 62.805   | 96.849   | 28.761   | 0.297 | -1.752 | 0.001 | 0.006 |
| FBgn0035702 | 134.756  | 207.705  | 61.807   | 0.298 | -1.749 | 0.000 | 0.000 |
| FBgn0083970 | 1442.181 | 2221.677 | 662.685  | 0.298 | -1.745 | 0.000 | 0.001 |
| FBgn0034214 | 129.035  | 198.723  | 59.347   | 0.299 | -1.744 | 0.000 | 0.000 |
| FBgn0034128 | 1061.933 | 1635.311 | 488.555  | 0.299 | -1.743 | 0.000 | 0.000 |
| FBgn0031710 | 260.823  | 401.444  | 120.202  | 0.299 | -1.740 | 0.011 | 0.038 |
| FBgn0034271 | 300.545  | 462.580  | 138.510  | 0.299 | -1.740 | 0.000 | 0.000 |
| FBgn0029686 | 34.688   | 53.383   | 15.993   | 0.300 | -1.739 | 0.001 | 0.004 |
| FBgn0036765 | 146.078  | 224.793  | 67.362   | 0.300 | -1.739 | 0.000 | 0.000 |
| FBgn0028855 | 630.684  | 969.144  | 292.223  | 0.302 | -1.730 | 0.000 | 0.000 |
| FBgn0261984 | 1303.751 | 2003.247 | 604.255  | 0.302 | -1.729 | 0.000 | 0.000 |
| FBgn0250830 | 234.254  | 359.887  | 108.622  | 0.302 | -1.728 | 0.000 | 0.001 |
| FBgn0263663 | 19.694   | 30.246   | 9.143    | 0.302 | -1.726 | 0.009 | 0.033 |
| FBgn0034436 | 333.263  | 511.790  | 154.737  | 0.302 | -1.726 | 0.000 | 0.000 |
| FBgn0038976 | 1045.834 | 1605.997 | 485.671  | 0.302 | -1.725 | 0.002 | 0.009 |
| FBgn0032799 | 528.203  | 810.747  | 245.660  | 0.303 | -1.723 | 0.002 | 0.009 |
| FBgn0039909 | 2534.862 | 3889.976 | 1179.747 | 0.303 | -1.721 | 0.000 | 0.000 |

|             |          |          |         |       |        |       |       |
|-------------|----------|----------|---------|-------|--------|-------|-------|
| FBgn0036124 | 483.633  | 742.070  | 225.196 | 0.303 | -1.720 | 0.000 | 0.000 |
| FBgn0032859 | 400.521  | 614.315  | 186.728 | 0.304 | -1.718 | 0.000 | 0.000 |
| FBgn0034756 | 111.821  | 171.474  | 52.168  | 0.304 | -1.717 | 0.000 | 0.000 |
| FBgn0035113 | 120.765  | 185.175  | 56.356  | 0.304 | -1.716 | 0.000 | 0.000 |
| FBgn0040010 | 463.015  | 709.784  | 216.246 | 0.305 | -1.715 | 0.000 | 0.000 |
| FBgn0051648 | 136.558  | 209.313  | 63.803  | 0.305 | -1.714 | 0.000 | 0.000 |
| FBgn0052207 | 70.209   | 107.603  | 32.816  | 0.305 | -1.713 | 0.000 | 0.000 |
| FBgn0026402 | 279.652  | 428.471  | 130.833 | 0.305 | -1.711 | 0.000 | 0.000 |
| FBgn0032979 | 967.376  | 1482.162 | 452.590 | 0.305 | -1.711 | 0.000 | 0.000 |
| FBgn0032943 | 330.616  | 506.464  | 154.768 | 0.306 | -1.710 | 0.000 | 0.000 |
| FBgn0034314 | 49.833   | 76.326   | 23.341  | 0.306 | -1.709 | 0.000 | 0.002 |
| FBgn0035420 | 450.663  | 690.165  | 211.162 | 0.306 | -1.709 | 0.000 | 0.000 |
| FBgn0038435 | 68.119   | 104.320  | 31.919  | 0.306 | -1.709 | 0.001 | 0.003 |
| FBgn0003719 | 88.254   | 135.146  | 41.361  | 0.306 | -1.708 | 0.000 | 0.000 |
| FBgn0038551 | 355.794  | 544.816  | 166.772 | 0.306 | -1.708 | 0.000 | 0.000 |
| FBgn0050424 | 87.297   | 133.665  | 40.929  | 0.306 | -1.707 | 0.000 | 0.000 |
| FBgn0031253 | 90.217   | 138.075  | 42.359  | 0.307 | -1.705 | 0.000 | 0.000 |
| FBgn0033302 | 19.956   | 30.536   | 9.376   | 0.307 | -1.703 | 0.007 | 0.028 |
| FBgn0022238 | 1945.891 | 2977.478 | 914.304 | 0.307 | -1.703 | 0.000 | 0.000 |
| FBgn0013347 | 2039.563 | 3120.427 | 958.698 | 0.307 | -1.703 | 0.007 | 0.025 |
| FBgn0000326 | 364.003  | 556.608  | 171.398 | 0.308 | -1.699 | 0.000 | 0.000 |
| FBgn0033542 | 96.750   | 147.850  | 45.650  | 0.309 | -1.695 | 0.001 | 0.003 |
| FBgn0260768 | 80.150   | 122.427  | 37.872  | 0.309 | -1.693 | 0.001 | 0.007 |
| FBgn0262741 | 68.348   | 104.379  | 32.317  | 0.310 | -1.691 | 0.000 | 0.000 |
| FBgn0030657 | 174.277  | 266.131  | 82.423  | 0.310 | -1.691 | 0.000 | 0.000 |
| FBgn0003483 | 35.262   | 53.833   | 16.690  | 0.310 | -1.689 | 0.001 | 0.004 |
| FBgn0032358 | 478.601  | 730.445  | 226.756 | 0.310 | -1.688 | 0.000 | 0.000 |
| FBgn0039296 | 355.138  | 541.936  | 168.341 | 0.311 | -1.687 | 0.000 | 0.000 |
| FBgn0086757 | 656.962  | 1002.509 | 311.415 | 0.311 | -1.687 | 0.000 | 0.000 |
| FBgn0058191 | 241.871  | 368.969  | 114.774 | 0.311 | -1.685 | 0.001 | 0.004 |
| FBgn0035876 | 133.188  | 203.168  | 63.209  | 0.311 | -1.684 | 0.003 | 0.013 |
| FBgn0031738 | 389.767  | 594.510  | 185.023 | 0.311 | -1.684 | 0.000 | 0.002 |
| FBgn0035827 | 103.014  | 157.121  | 48.906  | 0.311 | -1.684 | 0.000 | 0.000 |
| FBgn0037751 | 21.336   | 32.531   | 10.141  | 0.312 | -1.682 | 0.005 | 0.021 |

|             |          |          |          |       |        |       |       |
|-------------|----------|----------|----------|-------|--------|-------|-------|
| FBgn0025366 | 4374.935 | 6669.487 | 2080.384 | 0.312 | -1.681 | 0.007 | 0.026 |
| FBgn0011327 | 250.463  | 381.658  | 119.268  | 0.312 | -1.678 | 0.000 | 0.000 |
| FBgn0036888 | 1292.005 | 1968.703 | 615.307  | 0.313 | -1.678 | 0.000 | 0.000 |
| FBgn0260486 | 1322.678 | 2013.858 | 631.499  | 0.314 | -1.673 | 0.000 | 0.000 |
| FBgn0036662 | 295.590  | 450.037  | 141.144  | 0.314 | -1.673 | 0.000 | 0.000 |
| FBgn0035936 | 793.576  | 1208.055 | 379.096  | 0.314 | -1.672 | 0.000 | 0.000 |
| FBgn0036714 | 267.811  | 407.683  | 127.940  | 0.314 | -1.672 | 0.000 | 0.000 |
| FBgn0025355 | 219.432  | 333.962  | 104.902  | 0.314 | -1.671 | 0.000 | 0.000 |
| FBgn0014380 | 308.076  | 468.755  | 147.397  | 0.314 | -1.669 | 0.001 | 0.005 |
| FBgn0037248 | 391.216  | 594.971  | 187.460  | 0.315 | -1.666 | 0.000 | 0.000 |
| FBgn0038365 | 86.191   | 131.055  | 41.327   | 0.315 | -1.665 | 0.000 | 0.000 |
| FBgn0045866 | 1683.690 | 2559.568 | 807.811  | 0.316 | -1.664 | 0.000 | 0.000 |
| FBgn0034390 | 446.608  | 678.801  | 214.415  | 0.316 | -1.663 | 0.000 | 0.003 |
| FBgn0050390 | 250.006  | 379.945  | 120.067  | 0.316 | -1.662 | 0.002 | 0.011 |
| FBgn0051229 | 1084.095 | 1646.035 | 522.154  | 0.317 | -1.656 | 0.000 | 0.001 |
| FBgn0014931 | 57.885   | 87.875   | 27.895   | 0.317 | -1.655 | 0.000 | 0.001 |
| FBgn0051957 | 87.786   | 133.248  | 42.325   | 0.318 | -1.655 | 0.000 | 0.000 |
| FBgn0031247 | 306.086  | 464.542  | 147.630  | 0.318 | -1.654 | 0.004 | 0.016 |
| FBgn0263831 | 20.884   | 31.694   | 10.074   | 0.318 | -1.654 | 0.010 | 0.036 |
| FBgn0037544 | 360.016  | 546.339  | 173.694  | 0.318 | -1.653 | 0.000 | 0.000 |
| FBgn0034459 | 34.829   | 52.835   | 16.823   | 0.318 | -1.651 | 0.001 | 0.006 |
| FBgn0037817 | 239.466  | 363.193  | 115.740  | 0.319 | -1.650 | 0.000 | 0.000 |
| FBgn0036760 | 679.019  | 1029.569 | 328.468  | 0.319 | -1.648 | 0.000 | 0.000 |
| FBgn0035695 | 658.318  | 998.155  | 318.480  | 0.319 | -1.648 | 0.000 | 0.000 |
| FBgn0028427 | 1266.742 | 1920.337 | 613.147  | 0.319 | -1.647 | 0.000 | 0.000 |
| FBgn0035090 | 3000.981 | 4546.930 | 1455.031 | 0.320 | -1.644 | 0.000 | 0.000 |
| FBgn0032477 | 744.854  | 1128.425 | 361.284  | 0.320 | -1.643 | 0.000 | 0.000 |
| FBgn0026371 | 82.049   | 124.300  | 39.798   | 0.320 | -1.643 | 0.000 | 0.000 |
| FBgn0002354 | 391.873  | 593.636  | 190.110  | 0.320 | -1.643 | 0.001 | 0.005 |
| FBgn0036757 | 174.783  | 264.750  | 84.817   | 0.320 | -1.642 | 0.000 | 0.000 |
| FBgn0031998 | 420.155  | 636.187  | 204.122  | 0.321 | -1.640 | 0.002 | 0.009 |
| FBgn0039483 | 137.185  | 207.709  | 66.661   | 0.321 | -1.640 | 0.000 | 0.000 |
| FBgn0033982 | 93.029   | 140.841  | 45.217   | 0.321 | -1.639 | 0.000 | 0.000 |
| FBgn0034447 | 109.246  | 165.325  | 53.166   | 0.322 | -1.637 | 0.000 | 0.002 |

|             |          |          |          |       |        |       |       |
|-------------|----------|----------|----------|-------|--------|-------|-------|
| FBgn0031518 | 44.269   | 66.994   | 21.544   | 0.322 | -1.637 | 0.001 | 0.007 |
| FBgn0033897 | 1167.958 | 1767.463 | 568.454  | 0.322 | -1.637 | 0.000 | 0.000 |
| FBgn0022268 | 1132.304 | 1713.046 | 551.562  | 0.322 | -1.635 | 0.000 | 0.000 |
| FBgn0004436 | 1224.796 | 1852.964 | 596.627  | 0.322 | -1.635 | 0.001 | 0.004 |
| FBgn0000317 | 581.490  | 879.695  | 283.286  | 0.322 | -1.635 | 0.000 | 0.000 |
| FBgn0039925 | 65.608   | 99.231   | 31.985   | 0.322 | -1.633 | 0.000 | 0.001 |
| FBgn0026787 | 389.364  | 588.778  | 189.949  | 0.323 | -1.632 | 0.000 | 0.000 |
| FBgn0016078 | 1503.551 | 2272.487 | 734.614  | 0.323 | -1.629 | 0.000 | 0.000 |
| FBgn0034728 | 230.289  | 347.932  | 112.646  | 0.324 | -1.627 | 0.000 | 0.000 |
| FBgn0032264 | 540.465  | 816.505  | 264.426  | 0.324 | -1.627 | 0.000 | 0.000 |
| FBgn0038236 | 258.934  | 391.130  | 126.737  | 0.324 | -1.626 | 0.000 | 0.000 |
| FBgn0027095 | 969.552  | 1463.991 | 475.113  | 0.325 | -1.624 | 0.000 | 0.002 |
| FBgn0033809 | 223.326  | 337.201  | 109.450  | 0.325 | -1.623 | 0.000 | 0.001 |
| FBgn0038376 | 1051.096 | 1586.737 | 515.455  | 0.325 | -1.622 | 0.000 | 0.000 |
| FBgn0035462 | 144.088  | 217.423  | 70.754   | 0.325 | -1.620 | 0.000 | 0.000 |
| FBgn0263344 | 18.195   | 27.447   | 8.944    | 0.326 | -1.618 | 0.016 | 0.050 |
| FBgn0031970 | 230.301  | 347.325  | 113.277  | 0.326 | -1.616 | 0.000 | 0.000 |
| FBgn0015038 | 242.418  | 365.534  | 119.302  | 0.326 | -1.615 | 0.001 | 0.005 |
| FBgn0034073 | 92.650   | 139.650  | 45.650   | 0.327 | -1.613 | 0.000 | 0.000 |
| FBgn0020440 | 924.721  | 1393.539 | 455.904  | 0.327 | -1.612 | 0.000 | 0.000 |
| FBgn0038953 | 152.480  | 229.751  | 75.210   | 0.327 | -1.611 | 0.000 | 0.000 |
| FBgn0035627 | 23.110   | 34.817   | 11.404   | 0.328 | -1.610 | 0.009 | 0.033 |
| FBgn0003091 | 3002.392 | 4523.044 | 1481.740 | 0.328 | -1.610 | 0.004 | 0.015 |
| FBgn0051453 | 57.587   | 86.747   | 28.426   | 0.328 | -1.610 | 0.000 | 0.000 |
| FBgn0039250 | 60.216   | 90.708   | 29.724   | 0.328 | -1.610 | 0.000 | 0.002 |
| FBgn0028530 | 216.604  | 326.247  | 106.961  | 0.328 | -1.609 | 0.000 | 0.000 |
| FBgn0033817 | 469.640  | 707.246  | 232.034  | 0.328 | -1.608 | 0.007 | 0.028 |
| FBgn0034142 | 1305.295 | 1964.913 | 645.676  | 0.329 | -1.606 | 0.000 | 0.000 |
| FBgn0024320 | 983.595  | 1480.576 | 486.613  | 0.329 | -1.605 | 0.000 | 0.000 |
| FBgn0264572 | 56.487   | 85.013   | 27.962   | 0.329 | -1.604 | 0.010 | 0.036 |
| FBgn0260243 | 269.816  | 406.041  | 133.590  | 0.329 | -1.604 | 0.000 | 0.000 |
| FBgn0032409 | 361.043  | 543.242  | 178.845  | 0.329 | -1.603 | 0.000 | 0.000 |
| FBgn0015338 | 429.534  | 646.207  | 212.861  | 0.329 | -1.602 | 0.000 | 0.000 |
| FBgn0051778 | 778.700  | 1170.737 | 386.664  | 0.330 | -1.598 | 0.000 | 0.000 |

|             |          |           |          |       |        |       |       |
|-------------|----------|-----------|----------|-------|--------|-------|-------|
| FBgn0039324 | 101.822  | 153.038   | 50.605   | 0.331 | -1.597 | 0.002 | 0.009 |
| FBgn0033397 | 101.203  | 152.100   | 50.305   | 0.331 | -1.596 | 0.000 | 0.000 |
| FBgn0033240 | 113.204  | 170.119   | 56.290   | 0.331 | -1.596 | 0.000 | 0.000 |
| FBgn0037619 | 108.521  | 163.077   | 53.965   | 0.331 | -1.595 | 0.000 | 0.000 |
| FBgn0000307 | 1217.728 | 1829.841  | 605.616  | 0.331 | -1.595 | 0.000 | 0.000 |
| FBgn0031043 | 617.052  | 927.095   | 307.010  | 0.331 | -1.594 | 0.000 | 0.000 |
| FBgn0039993 | 246.862  | 370.875   | 122.849  | 0.331 | -1.594 | 0.000 | 0.001 |
| FBgn0031216 | 322.309  | 484.131   | 160.487  | 0.331 | -1.593 | 0.000 | 0.000 |
| FBgn0036892 | 923.190  | 1385.556  | 460.824  | 0.333 | -1.588 | 0.000 | 0.000 |
| FBgn0034804 | 241.850  | 362.910   | 120.790  | 0.333 | -1.587 | 0.000 | 0.002 |
| FBgn0053200 | 218.154  | 327.288   | 109.020  | 0.333 | -1.586 | 0.014 | 0.046 |
| FBgn0052220 | 123.315  | 184.955   | 61.674   | 0.333 | -1.584 | 0.000 | 0.000 |
| FBgn0051251 | 78.611   | 117.890   | 39.331   | 0.334 | -1.584 | 0.003 | 0.012 |
| FBgn0031045 | 148.748  | 222.988   | 74.509   | 0.334 | -1.581 | 0.000 | 0.000 |
| FBgn0035518 | 206.544  | 309.486   | 103.601  | 0.335 | -1.579 | 0.000 | 0.000 |
| FBgn0263046 | 174.219  | 261.032   | 87.406   | 0.335 | -1.578 | 0.000 | 0.000 |
| FBgn0034002 | 450.196  | 674.398   | 225.995  | 0.335 | -1.577 | 0.000 | 0.000 |
| FBgn0051465 | 131.267  | 196.404   | 66.130   | 0.337 | -1.570 | 0.000 | 0.000 |
| FBgn0035023 | 1637.507 | 2449.801  | 825.213  | 0.337 | -1.570 | 0.000 | 0.000 |
| FBgn0002872 | 138.455  | 207.120   | 69.790   | 0.337 | -1.569 | 0.000 | 0.000 |
| FBgn0037958 | 108.467  | 162.243   | 54.692   | 0.337 | -1.569 | 0.000 | 0.000 |
| FBgn0036205 | 50.300   | 75.231    | 25.369   | 0.337 | -1.568 | 0.000 | 0.002 |
| FBgn0035892 | 229.598  | 343.323   | 115.873  | 0.338 | -1.567 | 0.000 | 0.000 |
| FBgn0039941 | 134.159  | 200.592   | 67.725   | 0.338 | -1.567 | 0.000 | 0.000 |
| FBgn0023479 | 9641.660 | 14409.437 | 4873.883 | 0.338 | -1.564 | 0.000 | 0.000 |
| FBgn0036309 | 145.869  | 217.892   | 73.845   | 0.339 | -1.561 | 0.001 | 0.004 |
| FBgn0038465 | 1145.469 | 1710.660  | 580.279  | 0.339 | -1.560 | 0.000 | 0.000 |
| FBgn0036198 | 675.966  | 1009.342  | 342.589  | 0.339 | -1.559 | 0.000 | 0.000 |
| FBgn0002778 | 613.065  | 915.230   | 310.901  | 0.340 | -1.558 | 0.000 | 0.000 |
| FBgn0032822 | 108.114  | 161.398   | 54.830   | 0.340 | -1.558 | 0.001 | 0.007 |
| FBgn0032940 | 1846.496 | 2755.987  | 937.006  | 0.340 | -1.556 | 0.000 | 0.000 |
| FBgn0027086 | 665.646  | 993.256   | 338.035  | 0.340 | -1.555 | 0.000 | 0.000 |
| FBgn0032054 | 209.732  | 312.903   | 106.560  | 0.341 | -1.554 | 0.000 | 0.000 |
| FBgn0086371 | 393.815  | 587.439   | 200.191  | 0.341 | -1.553 | 0.000 | 0.000 |

|             |          |           |          |       |        |       |       |
|-------------|----------|-----------|----------|-------|--------|-------|-------|
| FBgn0051320 | 44.706   | 66.670    | 22.741   | 0.341 | -1.552 | 0.002 | 0.011 |
| FBgn0037378 | 386.859  | 576.920   | 196.799  | 0.341 | -1.552 | 0.000 | 0.000 |
| FBgn0023076 | 699.608  | 1043.162  | 356.055  | 0.341 | -1.551 | 0.000 | 0.000 |
| FBgn0033718 | 38.866   | 57.949    | 19.782   | 0.341 | -1.551 | 0.001 | 0.006 |
| FBgn0003969 | 512.150  | 763.468   | 260.832  | 0.342 | -1.549 | 0.000 | 0.000 |
| FBgn0037369 | 162.332  | 241.941   | 82.723   | 0.342 | -1.548 | 0.000 | 0.000 |
| FBgn0004646 | 2682.791 | 3998.388  | 1367.194 | 0.342 | -1.548 | 0.000 | 0.001 |
| FBgn0025781 | 162.624  | 242.362   | 82.887   | 0.342 | -1.548 | 0.000 | 0.000 |
| FBgn0030695 | 341.193  | 508.455   | 173.931  | 0.342 | -1.548 | 0.000 | 0.000 |
| FBgn0017414 | 137.499  | 204.872   | 70.125   | 0.342 | -1.547 | 0.000 | 0.001 |
| FBgn0026315 | 53.775   | 80.122    | 27.428   | 0.342 | -1.547 | 0.000 | 0.003 |
| FBgn0035515 | 500.845  | 745.844   | 255.846  | 0.343 | -1.544 | 0.000 | 0.000 |
| FBgn0052104 | 101.338  | 150.909   | 51.767   | 0.343 | -1.544 | 0.000 | 0.000 |
| FBgn0031305 | 233.357  | 347.500   | 119.215  | 0.343 | -1.543 | 0.000 | 0.000 |
| FBgn0037212 | 479.804  | 714.473   | 245.134  | 0.343 | -1.543 | 0.002 | 0.007 |
| FBgn0033491 | 162.288  | 241.654   | 82.922   | 0.343 | -1.543 | 0.000 | 0.000 |
| FBgn0032447 | 406.114  | 604.389   | 207.839  | 0.344 | -1.540 | 0.001 | 0.006 |
| FBgn0261049 | 442.659  | 658.463   | 226.854  | 0.345 | -1.537 | 0.000 | 0.000 |
| FBgn0027512 | 898.703  | 1336.677  | 460.729  | 0.345 | -1.537 | 0.000 | 0.000 |
| FBgn0002592 | 62.651   | 93.153    | 32.149   | 0.345 | -1.535 | 0.000 | 0.001 |
| FBgn0025683 | 7288.784 | 10834.200 | 3743.368 | 0.346 | -1.533 | 0.000 | 0.000 |
| FBgn0050394 | 280.576  | 417.051   | 144.100  | 0.346 | -1.533 | 0.000 | 0.000 |
| FBgn0016792 | 252.417  | 375.062   | 129.772  | 0.346 | -1.531 | 0.000 | 0.000 |
| FBgn0034579 | 233.525  | 346.990   | 120.061  | 0.346 | -1.531 | 0.001 | 0.003 |
| FBgn0067779 | 392.037  | 582.324   | 201.751  | 0.346 | -1.529 | 0.000 | 0.000 |
| FBgn0037896 | 736.984  | 1094.699  | 379.269  | 0.346 | -1.529 | 0.000 | 0.000 |
| FBgn0038854 | 309.187  | 459.078   | 159.297  | 0.347 | -1.527 | 0.000 | 0.000 |
| FBgn0030703 | 746.930  | 1108.846  | 385.014  | 0.347 | -1.526 | 0.000 | 0.000 |
| FBgn0033065 | 703.026  | 1043.374  | 362.677  | 0.348 | -1.524 | 0.000 | 0.000 |
| FBgn0032259 | 309.418  | 459.040   | 159.796  | 0.348 | -1.522 | 0.000 | 0.000 |
| FBgn0032670 | 33.730   | 50.036    | 17.423   | 0.348 | -1.522 | 0.011 | 0.038 |
| FBgn0033766 | 199.469  | 295.900   | 103.039  | 0.348 | -1.522 | 0.000 | 0.000 |
| FBgn0039302 | 2648.330 | 3928.619  | 1368.041 | 0.348 | -1.522 | 0.000 | 0.000 |
| FBgn0000629 | 429.880  | 637.560   | 222.199  | 0.349 | -1.521 | 0.000 | 0.000 |

|             |           |           |           |       |        |       |       |
|-------------|-----------|-----------|-----------|-------|--------|-------|-------|
| FBgn0262560 | 331.497   | 491.631   | 171.364   | 0.349 | -1.521 | 0.000 | 0.000 |
| FBgn0039023 | 237.812   | 352.339   | 123.285   | 0.350 | -1.515 | 0.000 | 0.000 |
| FBgn0037848 | 397.913   | 589.456   | 206.371   | 0.350 | -1.514 | 0.000 | 0.000 |
| FBgn0015569 | 133.783   | 198.180   | 69.386    | 0.350 | -1.514 | 0.000 | 0.000 |
| FBgn0263780 | 103.461   | 153.224   | 53.697    | 0.350 | -1.513 | 0.000 | 0.000 |
| FBgn0031220 | 627.096   | 928.317   | 325.876   | 0.351 | -1.510 | 0.000 | 0.000 |
| FBgn0033185 | 186.420   | 275.950   | 96.890    | 0.351 | -1.510 | 0.000 | 0.000 |
| FBgn0026869 | 1242.724  | 1838.854  | 646.593   | 0.352 | -1.508 | 0.001 | 0.004 |
| FBgn0262524 | 91.996    | 136.080   | 47.911    | 0.352 | -1.506 | 0.000 | 0.001 |
| FBgn0051523 | 2911.460  | 4306.301  | 1516.618  | 0.352 | -1.506 | 0.002 | 0.008 |
| FBgn0030707 | 150.579   | 222.690   | 78.469    | 0.352 | -1.505 | 0.000 | 0.001 |
| FBgn0053129 | 1528.019  | 2259.347  | 796.692   | 0.353 | -1.504 | 0.000 | 0.000 |
| FBgn0035689 | 97.498    | 144.161   | 50.836    | 0.353 | -1.504 | 0.001 | 0.005 |
| FBgn0051102 | 543.868   | 803.600   | 284.136   | 0.354 | -1.500 | 0.000 | 0.000 |
| FBgn0037236 | 67.757    | 100.106   | 35.408    | 0.354 | -1.499 | 0.000 | 0.001 |
| FBgn0014007 | 229.113   | 338.466   | 119.761   | 0.354 | -1.499 | 0.000 | 0.000 |
| FBgn0031876 | 103.890   | 153.451   | 54.328    | 0.354 | -1.498 | 0.000 | 0.000 |
| FBgn0085432 | 2574.836  | 3801.566  | 1348.106  | 0.355 | -1.496 | 0.002 | 0.008 |
| FBgn0034494 | 1179.280  | 1740.973  | 617.588   | 0.355 | -1.495 | 0.000 | 0.000 |
| FBgn0052523 | 3720.844  | 5492.868  | 1948.820  | 0.355 | -1.495 | 0.000 | 0.000 |
| FBgn0021856 | 514.832   | 759.809   | 269.854   | 0.355 | -1.493 | 0.000 | 0.000 |
| FBgn0032169 | 261.755   | 385.998   | 137.512   | 0.356 | -1.489 | 0.000 | 0.000 |
| FBgn0034365 | 195.946   | 288.925   | 102.966   | 0.356 | -1.489 | 0.000 | 0.000 |
| FBgn0263133 | 499.884   | 737.070   | 262.698   | 0.356 | -1.488 | 0.000 | 0.000 |
| FBgn0085320 | 1487.819  | 2193.503  | 782.135   | 0.357 | -1.488 | 0.000 | 0.002 |
| FBgn0037794 | 134.026   | 197.596   | 70.457    | 0.357 | -1.488 | 0.000 | 0.001 |
| FBgn0025879 | 1485.553  | 2189.908  | 781.199   | 0.357 | -1.487 | 0.000 | 0.000 |
| FBgn0039081 | 1727.644  | 2546.207  | 909.082   | 0.357 | -1.486 | 0.000 | 0.000 |
| FBgn0000559 | 35299.405 | 52013.700 | 18585.110 | 0.357 | -1.485 | 0.000 | 0.001 |
| FBgn0036423 | 30.732    | 45.272    | 16.192    | 0.358 | -1.483 | 0.006 | 0.023 |
| FBgn0034532 | 26.562    | 39.127    | 13.997    | 0.358 | -1.483 | 0.008 | 0.028 |
| FBgn0032684 | 351.660   | 517.764   | 185.556   | 0.358 | -1.480 | 0.005 | 0.018 |
| FBgn0261268 | 977.009   | 1438.000  | 516.018   | 0.359 | -1.479 | 0.000 | 0.000 |
| FBgn0037894 | 560.574   | 825.069   | 296.079   | 0.359 | -1.479 | 0.000 | 0.000 |

|             |          |          |          |       |        |       |       |
|-------------|----------|----------|----------|-------|--------|-------|-------|
| FBgn0032223 | 552.334  | 812.604  | 292.065  | 0.359 | -1.476 | 0.004 | 0.015 |
| FBgn0032014 | 139.130  | 204.582  | 73.678   | 0.360 | -1.473 | 0.000 | 0.000 |
| FBgn0033901 | 220.496  | 324.218  | 116.773  | 0.360 | -1.473 | 0.000 | 0.000 |
| FBgn0031170 | 1273.266 | 1871.287 | 675.245  | 0.361 | -1.471 | 0.000 | 0.000 |
| FBgn0021761 | 279.921  | 411.386  | 148.455  | 0.361 | -1.470 | 0.000 | 0.000 |
| FBgn0053155 | 228.392  | 335.630  | 121.154  | 0.361 | -1.470 | 0.001 | 0.004 |
| FBgn0036500 | 376.285  | 552.879  | 199.692  | 0.361 | -1.469 | 0.000 | 0.000 |
| FBgn0037633 | 160.539  | 235.829  | 85.249   | 0.361 | -1.468 | 0.000 | 0.000 |
| FBgn0017572 | 2696.188 | 3959.619 | 1432.756 | 0.362 | -1.467 | 0.000 | 0.001 |
| FBgn0003169 | 1196.961 | 1756.589 | 637.333  | 0.363 | -1.463 | 0.000 | 0.000 |
| FBgn0033740 | 32.715   | 48.008   | 17.423   | 0.363 | -1.462 | 0.010 | 0.035 |
| FBgn0027586 | 6423.882 | 9426.535 | 3421.229 | 0.363 | -1.462 | 0.000 | 0.000 |
| FBgn0031752 | 1352.448 | 1984.402 | 720.494  | 0.363 | -1.462 | 0.000 | 0.000 |
| FBgn0032498 | 153.389  | 225.050  | 81.728   | 0.363 | -1.461 | 0.000 | 0.000 |
| FBgn0037741 | 224.810  | 329.824  | 119.795  | 0.363 | -1.461 | 0.000 | 0.000 |
| FBgn0031694 | 34.500   | 50.613   | 18.386   | 0.363 | -1.461 | 0.006 | 0.023 |
| FBgn0037382 | 349.807  | 513.126  | 186.488  | 0.363 | -1.460 | 0.000 | 0.000 |
| FBgn0022936 | 165.670  | 243.002  | 88.338   | 0.364 | -1.460 | 0.000 | 0.000 |
| FBgn0031379 | 1535.622 | 2251.974 | 819.271  | 0.364 | -1.459 | 0.000 | 0.002 |
| FBgn0010339 | 604.901  | 887.020  | 322.781  | 0.364 | -1.458 | 0.000 | 0.000 |
| FBgn0032925 | 406.040  | 595.396  | 216.685  | 0.364 | -1.458 | 0.001 | 0.004 |
| FBgn0039821 | 109.379  | 160.375  | 58.383   | 0.364 | -1.458 | 0.000 | 0.000 |
| FBgn0015565 | 657.737  | 964.366  | 351.109  | 0.364 | -1.458 | 0.000 | 0.000 |
| FBgn0002431 | 3113.901 | 4563.550 | 1664.251 | 0.365 | -1.455 | 0.000 | 0.000 |
| FBgn0032391 | 190.960  | 279.776  | 102.145  | 0.365 | -1.454 | 0.001 | 0.003 |
| FBgn0085378 | 348.990  | 511.284  | 186.696  | 0.365 | -1.453 | 0.000 | 0.000 |
| FBgn0028996 | 2796.890 | 4097.469 | 1496.311 | 0.365 | -1.453 | 0.000 | 0.000 |
| FBgn0036305 | 830.980  | 1217.033 | 444.926  | 0.366 | -1.452 | 0.000 | 0.000 |
| FBgn0263504 | 76.484   | 111.972  | 40.995   | 0.366 | -1.450 | 0.013 | 0.044 |
| FBgn0053506 | 150.166  | 219.839  | 80.493   | 0.366 | -1.450 | 0.000 | 0.000 |
| FBgn0038767 | 145.671  | 213.240  | 78.102   | 0.366 | -1.449 | 0.000 | 0.000 |
| FBgn0015625 | 73.437   | 107.443  | 39.432   | 0.367 | -1.446 | 0.001 | 0.003 |
| FBgn0031229 | 476.181  | 696.589  | 255.773  | 0.367 | -1.445 | 0.000 | 0.000 |
| FBgn0262473 | 1124.383 | 1643.081 | 605.685  | 0.369 | -1.440 | 0.000 | 0.000 |



|             |           |           |          |       |        |       |       |
|-------------|-----------|-----------|----------|-------|--------|-------|-------|
| FBgn0259238 | 1696.864  | 2478.299  | 915.428  | 0.369 | -1.437 | 0.000 | 0.002 |
| FBgn0028426 | 184.630   | 269.581   | 99.679   | 0.370 | -1.435 | 0.000 | 0.000 |
| FBgn0039955 | 252.987   | 369.293   | 136.682  | 0.370 | -1.434 | 0.000 | 0.000 |
| FBgn0261286 | 344.040   | 502.179   | 185.900  | 0.370 | -1.434 | 0.000 | 0.001 |
| FBgn0019948 | 3914.547  | 5713.351  | 2115.743 | 0.370 | -1.433 | 0.000 | 0.000 |
| FBgn0086683 | 397.089   | 579.514   | 214.664  | 0.370 | -1.433 | 0.000 | 0.002 |
| FBgn0033980 | 437.516   | 638.331   | 236.701  | 0.371 | -1.431 | 0.000 | 0.000 |
| FBgn0037638 | 548.744   | 800.537   | 296.951  | 0.371 | -1.431 | 0.000 | 0.000 |
| FBgn0004797 | 177.346   | 258.705   | 95.987   | 0.371 | -1.430 | 0.000 | 0.001 |
| FBgn0020497 | 1897.283  | 2767.627  | 1026.939 | 0.371 | -1.430 | 0.000 | 0.000 |
| FBgn0039595 | 83.441    | 121.665   | 45.217   | 0.372 | -1.428 | 0.000 | 0.001 |
| FBgn0033775 | 75.569    | 110.174   | 40.963   | 0.372 | -1.427 | 0.000 | 0.001 |
| FBgn0031968 | 541.039   | 788.793   | 293.285  | 0.372 | -1.427 | 0.000 | 0.001 |
| FBgn0039726 | 442.135   | 644.584   | 239.686  | 0.372 | -1.427 | 0.000 | 0.000 |
| FBgn0053653 | 1373.545  | 2001.637  | 745.453  | 0.372 | -1.425 | 0.000 | 0.001 |
| FBgn0026565 | 268.325   | 390.930   | 145.721  | 0.373 | -1.424 | 0.000 | 0.000 |
| FBgn0035691 | 22.464    | 32.725    | 12.203   | 0.373 | -1.423 | 0.010 | 0.036 |
| FBgn0028955 | 2869.954  | 4180.155  | 1559.752 | 0.373 | -1.422 | 0.000 | 0.000 |
| FBgn0036386 | 178.924   | 260.566   | 97.282   | 0.373 | -1.421 | 0.000 | 0.000 |
| FBgn0034742 | 1978.096  | 2880.131  | 1076.062 | 0.374 | -1.420 | 0.000 | 0.000 |
| FBgn0037652 | 268.799   | 391.372   | 146.225  | 0.374 | -1.420 | 0.000 | 0.000 |
| FBgn0036317 | 1084.312  | 1578.256  | 590.368  | 0.374 | -1.419 | 0.000 | 0.000 |
| FBgn0038857 | 378.395   | 550.750   | 206.040  | 0.374 | -1.418 | 0.000 | 0.000 |
| FBgn0037822 | 887.419   | 1291.539  | 483.300  | 0.374 | -1.418 | 0.000 | 0.000 |
| FBgn0026427 | 758.007   | 1103.173  | 412.840  | 0.374 | -1.418 | 0.000 | 0.000 |
| FBgn0263600 | 133.714   | 194.581   | 72.847   | 0.374 | -1.417 | 0.000 | 0.000 |
| FBgn0027547 | 2460.519  | 3580.090  | 1340.949 | 0.375 | -1.417 | 0.000 | 0.000 |
| FBgn0032728 | 46.210    | 67.218    | 25.202   | 0.375 | -1.415 | 0.002 | 0.008 |
| FBgn0000406 | 13166.710 | 19151.585 | 7181.836 | 0.375 | -1.415 | 0.002 | 0.008 |
| FBgn0038202 | 225.649   | 328.111   | 123.187  | 0.375 | -1.413 | 0.000 | 0.000 |
| FBgn0004513 | 621.674   | 903.855   | 339.494  | 0.376 | -1.413 | 0.000 | 0.000 |
| FBgn0052176 | 385.431   | 560.364   | 210.499  | 0.376 | -1.413 | 0.000 | 0.000 |
| FBgn0039641 | 99.161    | 144.161   | 54.161   | 0.376 | -1.412 | 0.000 | 0.001 |
| FBgn0025700 | 2100.954  | 3053.789  | 1148.119 | 0.376 | -1.411 | 0.002 | 0.011 |

|             |          |          |          |       |        |       |       |
|-------------|----------|----------|----------|-------|--------|-------|-------|
| FBgn0031601 | 198.462  | 288.463  | 108.461  | 0.376 | -1.411 | 0.000 | 0.000 |
| FBgn0053120 | 436.530  | 634.273  | 238.786  | 0.376 | -1.409 | 0.000 | 0.000 |
| FBgn0010407 | 61.047   | 88.679   | 33.416   | 0.377 | -1.408 | 0.001 | 0.003 |
| FBgn0003076 | 4569.527 | 6634.526 | 2504.529 | 0.377 | -1.405 | 0.000 | 0.000 |
| FBgn0030801 | 161.979  | 235.118  | 88.840   | 0.378 | -1.404 | 0.000 | 0.000 |
| FBgn0260407 | 349.411  | 507.082  | 191.740  | 0.378 | -1.403 | 0.000 | 0.000 |
| FBgn0039272 | 65.885   | 95.595   | 36.176   | 0.378 | -1.402 | 0.009 | 0.034 |
| FBgn0035812 | 81.976   | 118.933  | 45.018   | 0.379 | -1.402 | 0.000 | 0.002 |
| FBgn0038173 | 131.350  | 190.553  | 72.146   | 0.379 | -1.401 | 0.000 | 0.000 |
| FBgn0031589 | 1325.456 | 1922.674 | 728.238  | 0.379 | -1.401 | 0.000 | 0.000 |
| FBgn0032699 | 751.590  | 1090.202 | 412.979  | 0.379 | -1.400 | 0.000 | 0.000 |
| FBgn0032850 | 47.854   | 69.376   | 26.332   | 0.380 | -1.398 | 0.002 | 0.008 |
| FBgn0027603 | 1095.080 | 1587.432 | 602.729  | 0.380 | -1.397 | 0.000 | 0.000 |
| FBgn0035150 | 150.982  | 218.775  | 83.190   | 0.380 | -1.395 | 0.000 | 0.003 |
| FBgn0013323 | 36.199   | 52.448   | 19.950   | 0.380 | -1.395 | 0.009 | 0.031 |
| FBgn0031995 | 2636.819 | 3820.255 | 1453.384 | 0.380 | -1.394 | 0.000 | 0.000 |
| FBgn0263076 | 35.890   | 51.998   | 19.782   | 0.380 | -1.394 | 0.005 | 0.019 |
| FBgn0034628 | 493.562  | 715.014  | 272.109  | 0.381 | -1.394 | 0.000 | 0.000 |
| FBgn0030733 | 5699.459 | 8256.287 | 3142.630 | 0.381 | -1.394 | 0.000 | 0.000 |
| FBgn0023180 | 38.197   | 55.314   | 21.080   | 0.381 | -1.392 | 0.006 | 0.022 |
| FBgn0030366 | 3127.230 | 4528.165 | 1726.295 | 0.381 | -1.391 | 0.000 | 0.000 |
| FBgn0038536 | 117.742  | 170.447  | 65.037   | 0.382 | -1.390 | 0.002 | 0.011 |
| FBgn0261274 | 659.616  | 954.762  | 364.471  | 0.382 | -1.389 | 0.000 | 0.000 |
| FBgn0037106 | 149.036  | 215.681  | 82.391   | 0.382 | -1.388 | 0.000 | 0.000 |
| FBgn0034114 | 210.931  | 305.190  | 116.672  | 0.382 | -1.387 | 0.000 | 0.001 |
| FBgn0037703 | 214.799  | 310.766  | 118.832  | 0.382 | -1.387 | 0.005 | 0.019 |
| FBgn0041180 | 3650.357 | 5280.285 | 2020.428 | 0.383 | -1.386 | 0.000 | 0.000 |
| FBgn0039073 | 610.198  | 882.352  | 338.044  | 0.383 | -1.384 | 0.000 | 0.000 |
| FBgn0261989 | 65.225   | 94.277   | 36.173   | 0.384 | -1.382 | 0.001 | 0.003 |
| FBgn0263986 | 250.228  | 361.678  | 138.779  | 0.384 | -1.382 | 0.000 | 0.000 |
| FBgn0033337 | 242.346  | 350.203  | 134.490  | 0.384 | -1.381 | 0.001 | 0.005 |
| FBgn0036211 | 3071.089 | 4437.382 | 1704.797 | 0.384 | -1.380 | 0.000 | 0.000 |
| FBgn0034529 | 351.434  | 507.666  | 195.201  | 0.385 | -1.379 | 0.000 | 0.000 |
| FBgn0041711 | 176.387  | 254.656  | 98.118   | 0.385 | -1.376 | 0.001 | 0.004 |

|             |           |           |           |       |        |       |       |
|-------------|-----------|-----------|-----------|-------|--------|-------|-------|
| FBgn0037883 | 283.948   | 409.927   | 157.970   | 0.385 | -1.376 | 0.011 | 0.037 |
| FBgn0020616 | 543.386   | 784.353   | 302.418   | 0.386 | -1.375 | 0.000 | 0.000 |
| FBgn0024248 | 1168.628  | 1686.823  | 650.434   | 0.386 | -1.375 | 0.000 | 0.000 |
| FBgn0027111 | 3402.546  | 4911.161  | 1893.931  | 0.386 | -1.375 | 0.000 | 0.000 |
| FBgn0031893 | 794.859   | 1146.987  | 442.732   | 0.386 | -1.373 | 0.000 | 0.000 |
| FBgn0038733 | 676.352   | 975.576   | 377.129   | 0.387 | -1.371 | 0.000 | 0.000 |
| FBgn0036752 | 297.329   | 428.843   | 165.815   | 0.387 | -1.371 | 0.000 | 0.000 |
| FBgn0051223 | 69.079    | 99.622    | 38.535    | 0.387 | -1.370 | 0.000 | 0.002 |
| FBgn0033194 | 1715.573  | 2473.544  | 957.602   | 0.387 | -1.369 | 0.000 | 0.000 |
| FBgn0261574 | 779.983   | 1124.550  | 435.417   | 0.387 | -1.369 | 0.000 | 0.000 |
| FBgn0260755 | 131.305   | 189.299   | 73.312    | 0.387 | -1.369 | 0.008 | 0.030 |
| FBgn0028406 | 329.901   | 475.544   | 184.258   | 0.387 | -1.368 | 0.000 | 0.001 |
| FBgn0039163 | 604.408   | 871.216   | 337.599   | 0.388 | -1.368 | 0.000 | 0.000 |
| FBgn0024921 | 1861.228  | 2682.818  | 1039.637  | 0.388 | -1.368 | 0.000 | 0.000 |
| FBgn0034703 | 31.139    | 44.855    | 17.423    | 0.388 | -1.364 | 0.014 | 0.045 |
| FBgn0264511 | 33.121    | 47.688    | 18.554    | 0.389 | -1.362 | 0.012 | 0.042 |
| FBgn0020414 | 1902.014  | 2737.522  | 1066.506  | 0.390 | -1.360 | 0.000 | 0.000 |
| FBgn0033699 | 33880.434 | 48724.719 | 19036.149 | 0.391 | -1.356 | 0.001 | 0.006 |
| FBgn0025693 | 276.441   | 397.476   | 155.406   | 0.391 | -1.355 | 0.000 | 0.001 |
| FBgn0015553 | 63.807    | 91.739    | 35.876    | 0.391 | -1.355 | 0.002 | 0.011 |
| FBgn0032329 | 120.923   | 173.852   | 67.993    | 0.391 | -1.354 | 0.000 | 0.001 |
| FBgn0016013 | 374.433   | 538.202   | 210.663   | 0.391 | -1.353 | 0.000 | 0.000 |
| FBgn0003742 | 382.565   | 549.882   | 215.249   | 0.391 | -1.353 | 0.000 | 0.000 |
| FBgn0053057 | 38.885    | 55.891    | 21.879    | 0.391 | -1.353 | 0.006 | 0.023 |
| FBgn0035923 | 146.545   | 210.567   | 82.524    | 0.392 | -1.351 | 0.000 | 0.000 |
| FBgn0015477 | 1200.157  | 1724.357  | 675.958   | 0.392 | -1.351 | 0.000 | 0.000 |
| FBgn0031914 | 1688.138  | 2424.864  | 951.411   | 0.392 | -1.350 | 0.000 | 0.000 |
| FBgn0037779 | 504.411   | 724.219   | 284.603   | 0.393 | -1.347 | 0.000 | 0.000 |
| FBgn0037773 | 56.030    | 80.442    | 31.619    | 0.393 | -1.347 | 0.001 | 0.007 |
| FBgn0034933 | 226.106   | 324.404   | 127.807   | 0.394 | -1.344 | 0.000 | 0.000 |
| FBgn0034346 | 293.626   | 421.276   | 165.976   | 0.394 | -1.344 | 0.000 | 0.000 |
| FBgn0036376 | 565.867   | 811.788   | 319.945   | 0.394 | -1.343 | 0.000 | 0.000 |
| FBgn0033381 | 441.006   | 632.606   | 249.406   | 0.394 | -1.343 | 0.000 | 0.000 |
| FBgn0037801 | 653.694   | 937.201   | 370.187   | 0.395 | -1.340 | 0.000 | 0.000 |

|             |          |          |          |       |        |       |       |
|-------------|----------|----------|----------|-------|--------|-------|-------|
| FBgn0031972 | 716.850  | 1027.716 | 405.984  | 0.395 | -1.340 | 0.000 | 0.000 |
| FBgn0035482 | 117.111  | 167.893  | 66.329   | 0.395 | -1.340 | 0.002 | 0.009 |
| FBgn0036020 | 407.596  | 584.114  | 231.077  | 0.396 | -1.338 | 0.000 | 0.000 |
| FBgn0037359 | 201.597  | 288.821  | 114.373  | 0.396 | -1.336 | 0.000 | 0.001 |
| FBgn0031191 | 698.427  | 1000.574 | 396.280  | 0.396 | -1.336 | 0.000 | 0.000 |
| FBgn0002645 | 888.965  | 1273.490 | 504.440  | 0.396 | -1.336 | 0.000 | 0.000 |
| FBgn0030854 | 570.229  | 816.817  | 323.640  | 0.396 | -1.336 | 0.000 | 0.000 |
| FBgn0025592 | 1736.876 | 2487.702 | 986.049  | 0.396 | -1.335 | 0.000 | 0.000 |
| FBgn0032524 | 710.023  | 1016.933 | 403.113  | 0.396 | -1.335 | 0.000 | 0.000 |
| FBgn0036570 | 154.627  | 221.443  | 87.810   | 0.397 | -1.334 | 0.000 | 0.000 |
| FBgn0033458 | 54.783   | 78.447   | 31.120   | 0.397 | -1.334 | 0.001 | 0.005 |
| FBgn0031670 | 1760.630 | 2520.992 | 1000.269 | 0.397 | -1.334 | 0.000 | 0.000 |
| FBgn0036553 | 357.658  | 511.876  | 203.441  | 0.397 | -1.331 | 0.000 | 0.000 |
| FBgn0032509 | 1663.988 | 2381.294 | 946.682  | 0.398 | -1.331 | 0.000 | 0.000 |
| FBgn0029526 | 165.428  | 236.730  | 94.127   | 0.398 | -1.331 | 0.013 | 0.043 |
| FBgn0036571 | 265.986  | 380.526  | 151.446  | 0.398 | -1.329 | 0.000 | 0.000 |
| FBgn0032005 | 1418.031 | 2027.790 | 808.273  | 0.399 | -1.327 | 0.000 | 0.000 |
| FBgn0035943 | 194.770  | 278.492  | 111.048  | 0.399 | -1.326 | 0.000 | 0.000 |
| FBgn0039056 | 1266.741 | 1810.964 | 722.518  | 0.399 | -1.326 | 0.000 | 0.000 |
| FBgn0033075 | 266.590  | 381.103  | 152.077  | 0.399 | -1.325 | 0.000 | 0.000 |
| FBgn0027055 | 563.748  | 805.848  | 321.647  | 0.399 | -1.325 | 0.000 | 0.000 |
| FBgn0024194 | 84.049   | 120.120  | 47.978   | 0.399 | -1.324 | 0.000 | 0.003 |
| FBgn0039321 | 3518.287 | 5025.965 | 2010.609 | 0.400 | -1.322 | 0.000 | 0.000 |
| FBgn0038087 | 94.471   | 134.949  | 53.994   | 0.400 | -1.322 | 0.000 | 0.001 |
| FBgn0087011 | 41.115   | 58.724   | 23.506   | 0.400 | -1.321 | 0.004 | 0.018 |
| FBgn0039125 | 232.905  | 332.649  | 133.160  | 0.400 | -1.321 | 0.000 | 0.000 |
| FBgn0033452 | 600.778  | 857.716  | 343.841  | 0.401 | -1.319 | 0.001 | 0.005 |
| FBgn0024188 | 660.692  | 943.149  | 378.234  | 0.401 | -1.318 | 0.001 | 0.004 |
| FBgn0000536 | 1629.612 | 2325.894 | 933.329  | 0.401 | -1.317 | 0.000 | 0.000 |
| FBgn0052576 | 109.559  | 156.314  | 62.805   | 0.402 | -1.315 | 0.004 | 0.017 |
| FBgn0029512 | 307.011  | 438.003  | 176.019  | 0.402 | -1.315 | 0.000 | 0.000 |
| FBgn0054054 | 211.640  | 301.792  | 121.488  | 0.403 | -1.313 | 0.000 | 0.000 |
| FBgn0028886 | 266.583  | 380.024  | 153.142  | 0.403 | -1.311 | 0.000 | 0.000 |
| FBgn0052647 | 1904.332 | 2713.946 | 1094.718 | 0.403 | -1.310 | 0.000 | 0.000 |

|             |          |          |          |       |        |       |       |
|-------------|----------|----------|----------|-------|--------|-------|-------|
| FBgn0037680 | 253.966  | 361.897  | 146.036  | 0.404 | -1.309 | 0.000 | 0.001 |
| FBgn0028373 | 1758.278 | 2505.010 | 1011.546 | 0.404 | -1.308 | 0.000 | 0.000 |
| FBgn0038662 | 1667.567 | 2375.376 | 959.759  | 0.404 | -1.307 | 0.000 | 0.000 |
| FBgn0050104 | 191.472  | 272.730  | 110.214  | 0.404 | -1.307 | 0.000 | 0.000 |
| FBgn0030457 | 473.873  | 674.841  | 272.905  | 0.404 | -1.306 | 0.000 | 0.000 |
| FBgn0011288 | 1371.138 | 1952.509 | 789.767  | 0.404 | -1.306 | 0.000 | 0.001 |
| FBgn0037071 | 204.769  | 291.400  | 118.137  | 0.405 | -1.303 | 0.012 | 0.040 |
| FBgn0035959 | 418.353  | 595.054  | 241.653  | 0.406 | -1.300 | 0.000 | 0.001 |
| FBgn0033518 | 195.497  | 277.982  | 113.012  | 0.407 | -1.299 | 0.001 | 0.005 |
| FBgn0262366 | 42.371   | 60.239   | 24.504   | 0.407 | -1.298 | 0.008 | 0.029 |
| FBgn0039205 | 319.163  | 453.636  | 184.691  | 0.407 | -1.296 | 0.000 | 0.000 |
| FBgn0032793 | 249.988  | 355.305  | 144.671  | 0.407 | -1.296 | 0.004 | 0.016 |
| FBgn0264467 | 32.854   | 46.690   | 19.018   | 0.407 | -1.296 | 0.010 | 0.034 |
| FBgn0035206 | 738.107  | 1048.165 | 428.049  | 0.408 | -1.292 | 0.000 | 0.000 |
| FBgn0031515 | 224.316  | 318.434  | 130.198  | 0.409 | -1.290 | 0.000 | 0.002 |
| FBgn0260049 | 811.633  | 1152.176 | 471.091  | 0.409 | -1.290 | 0.000 | 0.000 |
| FBgn0001229 | 119.544  | 169.698  | 69.389   | 0.409 | -1.290 | 0.000 | 0.001 |
| FBgn0031692 | 2828.229 | 4014.444 | 1642.015 | 0.409 | -1.290 | 0.000 | 0.000 |
| FBgn0037098 | 4555.968 | 6466.035 | 2645.900 | 0.409 | -1.289 | 0.000 | 0.000 |
| FBgn0039203 | 96.147   | 136.434  | 55.860   | 0.409 | -1.288 | 0.000 | 0.002 |
| FBgn0263048 | 174.980  | 248.220  | 101.741  | 0.410 | -1.287 | 0.000 | 0.000 |
| FBgn0015570 | 882.164  | 1251.393 | 512.936  | 0.410 | -1.287 | 0.000 | 0.000 |
| FBgn0260965 | 266.803  | 378.468  | 155.138  | 0.410 | -1.287 | 0.000 | 0.000 |
| FBgn0035170 | 1243.644 | 1764.005 | 723.283  | 0.410 | -1.286 | 0.000 | 0.000 |
| FBgn0030734 | 1274.803 | 1808.108 | 741.497  | 0.410 | -1.286 | 0.000 | 0.000 |
| FBgn0034543 | 693.549  | 983.467  | 403.631  | 0.410 | -1.285 | 0.000 | 0.000 |
| FBgn0010406 | 773.202  | 1096.306 | 450.098  | 0.411 | -1.284 | 0.000 | 0.000 |
| FBgn0033656 | 825.188  | 1169.784 | 480.593  | 0.411 | -1.283 | 0.000 | 0.002 |
| FBgn0263241 | 362.937  | 514.448  | 211.427  | 0.411 | -1.283 | 0.000 | 0.000 |
| FBgn0038593 | 392.648  | 556.511  | 228.784  | 0.411 | -1.282 | 0.000 | 0.000 |
| FBgn0033528 | 246.905  | 349.838  | 143.973  | 0.412 | -1.281 | 0.000 | 0.002 |
| FBgn0035849 | 485.323  | 687.496  | 283.150  | 0.412 | -1.280 | 0.000 | 0.003 |
| FBgn0000541 | 1601.248 | 2268.250 | 934.246  | 0.412 | -1.280 | 0.000 | 0.000 |
| FBgn0031992 | 1130.500 | 1600.935 | 660.065  | 0.412 | -1.278 | 0.000 | 0.000 |

|             |          |          |          |       |        |       |       |
|-------------|----------|----------|----------|-------|--------|-------|-------|
| FBgn0026147 | 1159.305 | 1641.703 | 676.906  | 0.412 | -1.278 | 0.000 | 0.000 |
| FBgn0034578 | 35.667   | 50.487   | 20.847   | 0.413 | -1.276 | 0.012 | 0.041 |
| FBgn0026592 | 3567.765 | 5050.062 | 2085.467 | 0.413 | -1.276 | 0.000 | 0.000 |
| FBgn0038638 | 131.669  | 186.370  | 76.969   | 0.413 | -1.276 | 0.000 | 0.001 |
| FBgn0050203 | 164.915  | 233.313  | 96.517   | 0.414 | -1.273 | 0.000 | 0.000 |
| FBgn0051161 | 76.433   | 108.112  | 44.753   | 0.414 | -1.272 | 0.003 | 0.012 |
| FBgn0037792 | 219.228  | 310.052  | 128.404  | 0.414 | -1.272 | 0.000 | 0.000 |
| FBgn0260861 | 266.636  | 377.099  | 156.173  | 0.414 | -1.272 | 0.004 | 0.017 |
| FBgn0034063 | 387.575  | 548.063  | 227.088  | 0.414 | -1.271 | 0.000 | 0.000 |
| FBgn0035524 | 409.456  | 578.989  | 239.922  | 0.414 | -1.271 | 0.000 | 0.000 |
| FBgn0034380 | 221.345  | 312.989  | 129.702  | 0.414 | -1.271 | 0.001 | 0.003 |
| FBgn0040534 | 164.015  | 231.910  | 96.119   | 0.414 | -1.271 | 0.000 | 0.001 |
| FBgn0013767 | 2073.165 | 2931.325 | 1215.005 | 0.414 | -1.271 | 0.001 | 0.004 |
| FBgn0038865 | 262.340  | 370.744  | 153.935  | 0.415 | -1.268 | 0.000 | 0.000 |
| FBgn0036556 | 1387.829 | 1960.813 | 814.845  | 0.416 | -1.267 | 0.003 | 0.012 |
| FBgn0038140 | 72.636   | 102.615  | 42.656   | 0.416 | -1.266 | 0.001 | 0.005 |
| FBgn0029828 | 544.446  | 768.847  | 320.046  | 0.416 | -1.264 | 0.000 | 0.000 |
| FBgn0053234 | 95.244   | 134.498  | 55.990   | 0.416 | -1.264 | 0.000 | 0.002 |
| FBgn0036249 | 246.109  | 347.515  | 144.703  | 0.416 | -1.264 | 0.001 | 0.006 |
| FBgn0051710 | 188.916  | 266.648  | 111.183  | 0.417 | -1.262 | 0.000 | 0.000 |
| FBgn0002914 | 1293.915 | 1826.268 | 761.561  | 0.417 | -1.262 | 0.000 | 0.000 |
| FBgn0034484 | 130.233  | 183.798  | 76.669   | 0.417 | -1.261 | 0.000 | 0.000 |
| FBgn0035461 | 137.671  | 194.283  | 81.059   | 0.417 | -1.261 | 0.000 | 0.001 |
| FBgn0036569 | 87.694   | 123.753  | 51.635   | 0.417 | -1.261 | 0.000 | 0.003 |
| FBgn0034136 | 120.620  | 170.190  | 71.051   | 0.417 | -1.260 | 0.002 | 0.007 |
| FBgn0037838 | 145.618  | 205.453  | 85.783   | 0.418 | -1.260 | 0.000 | 0.001 |
| FBgn0038862 | 1652.952 | 2332.133 | 973.771  | 0.418 | -1.260 | 0.000 | 0.000 |
| FBgn0036772 | 104.346  | 147.213  | 61.478   | 0.418 | -1.260 | 0.000 | 0.003 |
| FBgn0262858 | 258.109  | 364.115  | 152.103  | 0.418 | -1.259 | 0.016 | 0.050 |
| FBgn0031398 | 149.629  | 211.081  | 88.177   | 0.418 | -1.259 | 0.000 | 0.001 |
| FBgn0030603 | 669.884  | 944.575  | 395.193  | 0.418 | -1.257 | 0.000 | 0.001 |
| FBgn0038233 | 166.134  | 234.184  | 98.084   | 0.419 | -1.256 | 0.000 | 0.001 |
| FBgn0039189 | 97.978   | 138.072  | 57.885   | 0.419 | -1.254 | 0.002 | 0.010 |
| FBgn0037240 | 1617.962 | 2279.707 | 956.217  | 0.419 | -1.253 | 0.000 | 0.000 |

|             |          |          |          |       |        |       |       |
|-------------|----------|----------|----------|-------|--------|-------|-------|
| FBgn0020240 | 1359.343 | 1915.215 | 803.470  | 0.420 | -1.253 | 0.000 | 0.000 |
| FBgn0033107 | 116.026  | 163.427  | 68.625   | 0.420 | -1.252 | 0.002 | 0.009 |
| FBgn0034158 | 959.601  | 1351.617 | 567.586  | 0.420 | -1.252 | 0.000 | 0.001 |
| FBgn0037709 | 453.827  | 639.008  | 268.645  | 0.420 | -1.250 | 0.000 | 0.000 |
| FBgn0033039 | 426.477  | 600.365  | 252.590  | 0.421 | -1.249 | 0.000 | 0.000 |
| FBgn0037358 | 1567.205 | 2206.196 | 928.214  | 0.421 | -1.249 | 0.002 | 0.009 |
| FBgn0015776 | 3847.809 | 5416.643 | 2278.975 | 0.421 | -1.249 | 0.002 | 0.008 |
| FBgn0035978 | 3291.330 | 4633.099 | 1949.560 | 0.421 | -1.249 | 0.002 | 0.009 |
| FBgn0033889 | 849.922  | 1196.231 | 503.613  | 0.421 | -1.248 | 0.000 | 0.000 |
| FBgn0012051 | 952.714  | 1340.685 | 564.743  | 0.421 | -1.247 | 0.000 | 0.002 |
| FBgn0029114 | 227.540  | 320.198  | 134.882  | 0.421 | -1.247 | 0.000 | 0.000 |
| FBgn0050000 | 535.609  | 753.494  | 317.725  | 0.422 | -1.246 | 0.000 | 0.000 |
| FBgn0037440 | 401.329  | 564.566  | 238.091  | 0.422 | -1.246 | 0.000 | 0.000 |
| FBgn0039232 | 231.899  | 325.982  | 137.815  | 0.423 | -1.242 | 0.000 | 0.000 |
| FBgn0015765 | 196.587  | 276.274  | 116.900  | 0.423 | -1.241 | 0.000 | 0.000 |
| FBgn0040283 | 806.951  | 1133.896 | 480.006  | 0.423 | -1.240 | 0.000 | 0.000 |
| FBgn0037073 | 663.110  | 931.458  | 394.763  | 0.424 | -1.239 | 0.000 | 0.000 |
| FBgn0034509 | 252.810  | 355.108  | 150.511  | 0.424 | -1.238 | 0.000 | 0.001 |
| FBgn0260960 | 4041.197 | 5675.767 | 2406.628 | 0.424 | -1.238 | 0.003 | 0.012 |
| FBgn0037553 | 197.376  | 277.152  | 117.601  | 0.424 | -1.237 | 0.000 | 0.001 |
| FBgn0031182 | 147.242  | 206.741  | 87.744   | 0.424 | -1.236 | 0.000 | 0.001 |
| FBgn0035904 | 1541.080 | 2162.677 | 919.482  | 0.425 | -1.234 | 0.000 | 0.002 |
| FBgn0045035 | 190.293  | 267.009  | 113.577  | 0.425 | -1.233 | 0.000 | 0.000 |
| FBgn0015546 | 234.371  | 328.662  | 140.080  | 0.426 | -1.230 | 0.000 | 0.000 |
| FBgn0036967 | 697.761  | 978.378  | 417.144  | 0.426 | -1.230 | 0.000 | 0.002 |
| FBgn0032671 | 135.455  | 189.783  | 81.128   | 0.427 | -1.226 | 0.000 | 0.001 |
| FBgn0031673 | 1222.012 | 1711.801 | 732.223  | 0.428 | -1.225 | 0.000 | 0.000 |
| FBgn0035833 | 509.777  | 713.874  | 305.680  | 0.428 | -1.224 | 0.000 | 0.000 |
| FBgn0263120 | 6001.055 | 8403.590 | 3598.520 | 0.428 | -1.224 | 0.000 | 0.000 |
| FBgn0030100 | 298.252  | 417.561  | 178.943  | 0.429 | -1.222 | 0.000 | 0.001 |
| FBgn0033544 | 4374.488 | 6121.900 | 2627.075 | 0.429 | -1.221 | 0.000 | 0.000 |
| FBgn0032721 | 760.910  | 1064.460 | 457.360  | 0.430 | -1.219 | 0.000 | 0.000 |
| FBgn0037478 | 372.268  | 520.776  | 223.760  | 0.430 | -1.219 | 0.000 | 0.000 |
| FBgn0031631 | 139.633  | 195.314  | 83.951   | 0.430 | -1.218 | 0.000 | 0.001 |

|             |          |          |          |       |        |       |       |
|-------------|----------|----------|----------|-------|--------|-------|-------|
| FBgn0037898 | 111.318  | 155.707  | 66.929   | 0.430 | -1.218 | 0.001 | 0.005 |
| FBgn0260655 | 458.771  | 641.677  | 275.865  | 0.430 | -1.218 | 0.001 | 0.005 |
| FBgn0023416 | 1465.068 | 2049.029 | 881.108  | 0.430 | -1.218 | 0.000 | 0.000 |
| FBgn0015794 | 1204.683 | 1683.827 | 725.538  | 0.431 | -1.215 | 0.000 | 0.001 |
| FBgn0027375 | 204.116  | 285.180  | 123.051  | 0.431 | -1.213 | 0.000 | 0.002 |
| FBgn0036191 | 364.813  | 509.624  | 220.002  | 0.432 | -1.212 | 0.000 | 0.000 |
| FBgn0038474 | 491.789  | 686.964  | 296.613  | 0.432 | -1.212 | 0.000 | 0.000 |
| FBgn0033130 | 583.828  | 815.388  | 352.268  | 0.432 | -1.211 | 0.000 | 0.000 |
| FBgn0039357 | 147.421  | 205.870  | 88.973   | 0.432 | -1.210 | 0.000 | 0.001 |
| FBgn0030717 | 230.815  | 322.257  | 139.373  | 0.432 | -1.209 | 0.000 | 0.000 |
| FBgn0035851 | 214.357  | 299.276  | 129.437  | 0.433 | -1.209 | 0.000 | 0.000 |
| FBgn0263864 | 421.808  | 588.901  | 254.715  | 0.433 | -1.209 | 0.000 | 0.000 |
| FBgn0036402 | 515.054  | 719.011  | 311.097  | 0.433 | -1.209 | 0.000 | 0.000 |
| FBgn0037526 | 198.765  | 277.472  | 120.058  | 0.433 | -1.209 | 0.000 | 0.000 |
| FBgn0037535 | 180.453  | 251.816  | 109.090  | 0.433 | -1.207 | 0.000 | 0.001 |
| FBgn0036886 | 280.614  | 391.566  | 169.662  | 0.433 | -1.207 | 0.000 | 0.000 |
| FBgn0003495 | 625.271  | 872.306  | 378.237  | 0.434 | -1.206 | 0.000 | 0.000 |
| FBgn0026255 | 61.544   | 85.851   | 37.237   | 0.434 | -1.205 | 0.002 | 0.009 |
| FBgn0263830 | 1175.933 | 1638.857 | 713.009  | 0.435 | -1.201 | 0.000 | 0.000 |
| FBgn0011726 | 1688.134 | 2351.968 | 1024.300 | 0.436 | -1.199 | 0.000 | 0.001 |
| FBgn0032204 | 169.524  | 236.179  | 102.868  | 0.436 | -1.199 | 0.000 | 0.001 |
| FBgn0032495 | 326.346  | 454.633  | 198.059  | 0.436 | -1.199 | 0.000 | 0.000 |
| FBgn0051445 | 659.198  | 918.170  | 400.226  | 0.436 | -1.198 | 0.002 | 0.008 |
| FBgn0064237 | 980.517  | 1365.695 | 595.340  | 0.436 | -1.198 | 0.000 | 0.000 |
| FBgn0001990 | 208.034  | 289.692  | 126.377  | 0.436 | -1.197 | 0.000 | 0.000 |
| FBgn0086895 | 283.019  | 394.108  | 171.929  | 0.436 | -1.197 | 0.000 | 0.000 |
| FBgn0037234 | 876.406  | 1220.372 | 532.440  | 0.436 | -1.197 | 0.000 | 0.002 |
| FBgn0030322 | 299.620  | 417.211  | 182.029  | 0.436 | -1.197 | 0.001 | 0.004 |
| FBgn0263316 | 437.054  | 608.584  | 265.525  | 0.436 | -1.197 | 0.000 | 0.000 |
| FBgn0036133 | 360.148  | 501.391  | 218.906  | 0.437 | -1.196 | 0.000 | 0.000 |
| FBgn0085420 | 260.564  | 362.731  | 158.397  | 0.437 | -1.195 | 0.000 | 0.000 |
| FBgn0036259 | 80.217   | 111.660  | 48.773   | 0.437 | -1.195 | 0.001 | 0.005 |
| FBgn0035082 | 735.175  | 1023.330 | 447.020  | 0.437 | -1.195 | 0.002 | 0.008 |
| FBgn0032222 | 939.876  | 1308.207 | 571.546  | 0.437 | -1.195 | 0.000 | 0.000 |



|             |           |           |           |       |        |       |       |
|-------------|-----------|-----------|-----------|-------|--------|-------|-------|
| FBgn0037141 | 97.034    | 134.986   | 59.081    | 0.438 | -1.192 | 0.001 | 0.004 |
| FBgn0040259 | 964.252   | 1341.170  | 587.333   | 0.438 | -1.191 | 0.000 | 0.000 |
| FBgn0038172 | 1463.908  | 2036.114  | 891.701   | 0.438 | -1.191 | 0.000 | 0.000 |
| FBgn0051674 | 43.058    | 59.881    | 26.234    | 0.438 | -1.191 | 0.016 | 0.050 |
| FBgn0039290 | 322.331   | 448.224   | 196.439   | 0.438 | -1.190 | 0.003 | 0.014 |
| FBgn0037232 | 289.645   | 402.766   | 176.524   | 0.438 | -1.190 | 0.004 | 0.016 |
| FBgn0040491 | 295.562   | 410.880   | 180.244   | 0.439 | -1.189 | 0.000 | 0.000 |
| FBgn0023528 | 1468.729  | 2041.624  | 895.834   | 0.439 | -1.188 | 0.000 | 0.000 |
| FBgn0011336 | 1022.334  | 1421.102  | 623.567   | 0.439 | -1.188 | 0.000 | 0.000 |
| FBgn0038290 | 371.586   | 516.427   | 226.744   | 0.439 | -1.187 | 0.000 | 0.000 |
| FBgn0046763 | 1026.338  | 1426.344  | 626.333   | 0.439 | -1.187 | 0.014 | 0.046 |
| FBgn0016122 | 3789.586  | 5266.231  | 2312.941  | 0.439 | -1.187 | 0.000 | 0.000 |
| FBgn0039937 | 99.211    | 137.845   | 60.578    | 0.439 | -1.186 | 0.001 | 0.003 |
| FBgn0031651 | 621.975   | 863.772   | 380.178   | 0.440 | -1.184 | 0.000 | 0.000 |
| FBgn0036668 | 963.681   | 1337.938  | 589.424   | 0.441 | -1.183 | 0.000 | 0.000 |
| FBgn0261788 | 33167.512 | 46015.891 | 20319.132 | 0.442 | -1.179 | 0.000 | 0.000 |
| FBgn0039164 | 241.411   | 334.897   | 147.924   | 0.442 | -1.179 | 0.000 | 0.000 |
| FBgn0037536 | 2114.251  | 2932.148  | 1296.354  | 0.442 | -1.177 | 0.000 | 0.000 |
| FBgn0034117 | 509.915   | 707.082   | 312.747   | 0.442 | -1.177 | 0.006 | 0.022 |
| FBgn0026374 | 292.212   | 405.182   | 179.243   | 0.442 | -1.177 | 0.000 | 0.000 |
| FBgn0032516 | 309.454   | 428.925   | 189.984   | 0.443 | -1.175 | 0.000 | 0.000 |
| FBgn0034479 | 1263.908  | 1751.685  | 776.131   | 0.443 | -1.174 | 0.000 | 0.000 |
| FBgn0032221 | 159.339   | 220.829   | 97.850    | 0.443 | -1.174 | 0.000 | 0.001 |
| FBgn0083969 | 728.734   | 1009.585  | 447.882   | 0.444 | -1.173 | 0.000 | 0.000 |
| FBgn0028645 | 242.231   | 335.515   | 148.948   | 0.444 | -1.172 | 0.003 | 0.014 |
| FBgn0037231 | 1321.954  | 1830.999  | 812.910   | 0.444 | -1.171 | 0.000 | 0.000 |
| FBgn0035631 | 754.102   | 1044.383  | 463.821   | 0.444 | -1.171 | 0.000 | 0.000 |
| FBgn0263977 | 455.122   | 629.867   | 280.378   | 0.445 | -1.168 | 0.000 | 0.000 |
| FBgn0038968 | 228.752   | 316.499   | 141.005   | 0.446 | -1.166 | 0.000 | 0.001 |
| FBgn0038490 | 62.124    | 85.947    | 38.301    | 0.446 | -1.166 | 0.003 | 0.012 |
| FBgn0033376 | 242.876   | 335.935   | 149.816   | 0.446 | -1.165 | 0.001 | 0.004 |
| FBgn0037669 | 172.171   | 238.081   | 106.260   | 0.446 | -1.164 | 0.000 | 0.001 |
| FBgn0026061 | 1652.179  | 2283.476  | 1020.882  | 0.447 | -1.161 | 0.000 | 0.002 |
| FBgn0033379 | 486.259   | 672.023   | 300.495   | 0.447 | -1.161 | 0.000 | 0.000 |

|             |           |           |           |       |        |       |       |
|-------------|-----------|-----------|-----------|-------|--------|-------|-------|
| FBgn0036333 | 315.712   | 436.119   | 195.305   | 0.448 | -1.159 | 0.000 | 0.002 |
| FBgn0035158 | 293.676   | 405.553   | 181.798   | 0.448 | -1.158 | 0.014 | 0.045 |
| FBgn0052112 | 518.657   | 716.227   | 321.088   | 0.448 | -1.157 | 0.003 | 0.014 |
| FBgn0036695 | 640.244   | 884.009   | 396.478   | 0.449 | -1.157 | 0.000 | 0.000 |
| FBgn0035452 | 150.531   | 207.839   | 93.224    | 0.449 | -1.157 | 0.000 | 0.002 |
| FBgn0033243 | 42.024    | 58.017    | 26.032    | 0.449 | -1.156 | 0.014 | 0.045 |
| FBgn0034379 | 131.047   | 180.902   | 81.191    | 0.449 | -1.156 | 0.000 | 0.003 |
| FBgn0025936 | 852.548   | 1176.688  | 528.407   | 0.449 | -1.155 | 0.000 | 0.000 |
| FBgn0036448 | 3496.859  | 4824.761  | 2168.957  | 0.450 | -1.153 | 0.000 | 0.000 |
| FBgn0015575 | 4334.581  | 5979.849  | 2689.313  | 0.450 | -1.153 | 0.000 | 0.000 |
| FBgn0034086 | 207.315   | 285.891   | 128.739   | 0.450 | -1.151 | 0.001 | 0.005 |
| FBgn0033698 | 838.421   | 1156.069  | 520.774   | 0.450 | -1.150 | 0.000 | 0.000 |
| FBgn0035231 | 1656.384  | 2283.228  | 1029.540  | 0.451 | -1.149 | 0.000 | 0.000 |
| FBgn0038752 | 315.486   | 434.843   | 196.130   | 0.451 | -1.149 | 0.000 | 0.000 |
| FBgn0037834 | 537.363   | 740.637   | 334.090   | 0.451 | -1.149 | 0.000 | 0.000 |
| FBgn0034270 | 79.292    | 109.278   | 49.307    | 0.451 | -1.148 | 0.002 | 0.010 |
| FBgn0259978 | 925.130   | 1274.852  | 575.408   | 0.451 | -1.148 | 0.000 | 0.000 |
| FBgn0029913 | 121.026   | 166.777   | 75.276    | 0.451 | -1.148 | 0.001 | 0.004 |
| FBgn0250823 | 3298.608  | 4544.643  | 2052.573  | 0.452 | -1.147 | 0.005 | 0.020 |
| FBgn0064225 | 7269.558  | 10015.522 | 4523.594  | 0.452 | -1.147 | 0.000 | 0.000 |
| FBgn0086451 | 436.828   | 601.716   | 271.939   | 0.452 | -1.146 | 0.000 | 0.000 |
| FBgn0036815 | 127.041   | 174.984   | 79.097    | 0.452 | -1.146 | 0.001 | 0.004 |
| FBgn0040079 | 855.056   | 1177.713  | 532.399   | 0.452 | -1.145 | 0.000 | 0.000 |
| FBgn0037368 | 105.166   | 144.831   | 65.502    | 0.452 | -1.145 | 0.003 | 0.012 |
| FBgn0035382 | 63.252    | 87.071    | 39.432    | 0.453 | -1.143 | 0.005 | 0.019 |
| FBgn0033055 | 428.348   | 589.649   | 267.047   | 0.453 | -1.143 | 0.000 | 0.000 |
| FBgn0025820 | 470.332   | 647.353   | 293.310   | 0.453 | -1.142 | 0.000 | 0.000 |
| FBgn0030317 | 17325.295 | 23843.319 | 10807.271 | 0.453 | -1.142 | 0.001 | 0.004 |
| FBgn0029831 | 747.834   | 1029.011  | 466.656   | 0.453 | -1.141 | 0.004 | 0.017 |
| FBgn0033427 | 122.148   | 168.057   | 76.239    | 0.454 | -1.140 | 0.004 | 0.017 |
| FBgn0010741 | 546.164   | 751.364   | 340.965   | 0.454 | -1.140 | 0.000 | 0.000 |
| FBgn0036512 | 413.503   | 568.802   | 258.205   | 0.454 | -1.139 | 0.000 | 0.001 |
| FBgn0027526 | 343.480   | 472.369   | 214.591   | 0.454 | -1.138 | 0.000 | 0.000 |
| FBgn0028691 | 1265.828  | 1740.712  | 790.945   | 0.454 | -1.138 | 0.000 | 0.000 |

|             |          |          |          |       |        |       |       |
|-------------|----------|----------|----------|-------|--------|-------|-------|
| FBgn0039656 | 171.204  | 235.412  | 106.996  | 0.455 | -1.138 | 0.000 | 0.002 |
| FBgn0052944 | 357.861  | 491.795  | 223.927  | 0.455 | -1.135 | 0.000 | 0.000 |
| FBgn0037643 | 4439.546 | 6101.046 | 2778.046 | 0.455 | -1.135 | 0.007 | 0.025 |
| FBgn0032208 | 5163.407 | 7094.964 | 3231.850 | 0.456 | -1.134 | 0.000 | 0.000 |
| FBgn0036038 | 264.579  | 363.516  | 165.641  | 0.456 | -1.134 | 0.000 | 0.001 |
| FBgn0036063 | 235.403  | 323.381  | 147.425  | 0.456 | -1.133 | 0.000 | 0.001 |
| FBgn0038830 | 227.071  | 311.734  | 142.407  | 0.457 | -1.130 | 0.007 | 0.027 |
| FBgn0036183 | 151.640  | 208.155  | 95.125   | 0.457 | -1.130 | 0.000 | 0.002 |
| FBgn0033978 | 203.571  | 279.438  | 127.703  | 0.457 | -1.130 | 0.000 | 0.001 |
| FBgn0063368 | 91.328   | 125.268  | 57.389   | 0.458 | -1.126 | 0.003 | 0.012 |
| FBgn0053056 | 495.751  | 679.758  | 311.743  | 0.459 | -1.125 | 0.001 | 0.004 |
| FBgn0025830 | 297.107  | 407.363  | 186.851  | 0.459 | -1.124 | 0.000 | 0.000 |
| FBgn0029002 | 124.371  | 170.506  | 78.235   | 0.459 | -1.124 | 0.001 | 0.004 |
| FBgn0014075 | 816.930  | 1119.964 | 513.895  | 0.459 | -1.124 | 0.000 | 0.000 |
| FBgn0260780 | 159.659  | 218.875  | 100.443  | 0.459 | -1.124 | 0.001 | 0.005 |
| FBgn0032723 | 458.163  | 627.931  | 288.396  | 0.459 | -1.123 | 0.000 | 0.000 |
| FBgn0013432 | 822.495  | 1127.252 | 517.738  | 0.459 | -1.123 | 0.015 | 0.048 |
| FBgn0040271 | 963.183  | 1319.466 | 606.900  | 0.460 | -1.120 | 0.000 | 0.000 |
| FBgn0033457 | 229.988  | 315.013  | 144.962  | 0.460 | -1.120 | 0.000 | 0.001 |
| FBgn0086779 | 552.194  | 756.299  | 348.089  | 0.460 | -1.119 | 0.000 | 0.000 |
| FBgn0034451 | 179.153  | 245.123  | 113.182  | 0.462 | -1.115 | 0.014 | 0.046 |
| FBgn0053054 | 79.418   | 108.630  | 50.207   | 0.462 | -1.113 | 0.011 | 0.037 |
| FBgn0031483 | 978.649  | 1338.600 | 618.699  | 0.462 | -1.113 | 0.012 | 0.040 |
| FBgn0031436 | 3612.612 | 4940.532 | 2284.693 | 0.462 | -1.113 | 0.001 | 0.005 |
| FBgn0035407 | 179.547  | 245.514  | 113.580  | 0.463 | -1.112 | 0.000 | 0.003 |
| FBgn0036147 | 770.671  | 1053.782 | 487.560  | 0.463 | -1.112 | 0.002 | 0.010 |
| FBgn0038296 | 180.778  | 247.185  | 114.370  | 0.463 | -1.112 | 0.000 | 0.002 |
| FBgn0085212 | 119.907  | 163.940  | 75.873   | 0.463 | -1.112 | 0.001 | 0.003 |
| FBgn0029713 | 148.955  | 203.652  | 94.259   | 0.463 | -1.111 | 0.000 | 0.003 |
| FBgn0035337 | 142.483  | 194.797  | 90.170   | 0.463 | -1.111 | 0.001 | 0.003 |
| FBgn0037019 | 313.682  | 428.638  | 198.725  | 0.464 | -1.109 | 0.000 | 0.001 |
| FBgn0040929 | 52.518   | 71.721   | 33.315   | 0.465 | -1.106 | 0.010 | 0.035 |
| FBgn0032030 | 523.016  | 714.247  | 331.785  | 0.465 | -1.106 | 0.000 | 0.000 |
| FBgn0032338 | 438.517  | 598.750  | 278.284  | 0.465 | -1.105 | 0.000 | 0.000 |

|             |           |           |           |       |        |       |       |
|-------------|-----------|-----------|-----------|-------|--------|-------|-------|
| FBgn0262742 | 23543.909 | 32145.697 | 14942.121 | 0.465 | -1.105 | 0.000 | 0.000 |
| FBgn0014342 | 67.409    | 92.029    | 42.789    | 0.465 | -1.105 | 0.006 | 0.024 |
| FBgn0031906 | 96.800    | 132.023   | 61.576    | 0.466 | -1.100 | 0.002 | 0.009 |
| FBgn0024510 | 192.381   | 262.342   | 122.420   | 0.467 | -1.100 | 0.000 | 0.002 |
| FBgn0083985 | 64.209    | 87.555    | 40.862    | 0.467 | -1.099 | 0.005 | 0.021 |
| FBgn0039764 | 256.304   | 349.461   | 163.147   | 0.467 | -1.099 | 0.001 | 0.006 |
| FBgn0013810 | 46.068    | 62.811    | 29.326    | 0.467 | -1.099 | 0.015 | 0.049 |
| FBgn0030803 | 93.714    | 127.747   | 59.681    | 0.467 | -1.098 | 0.004 | 0.016 |
| FBgn0035470 | 208.251   | 283.841   | 132.661   | 0.467 | -1.097 | 0.000 | 0.002 |
| FBgn0032149 | 200.056   | 272.604   | 127.508   | 0.468 | -1.096 | 0.000 | 0.002 |
| FBgn0037979 | 527.686   | 718.822   | 336.550   | 0.468 | -1.095 | 0.003 | 0.014 |
| FBgn0032938 | 976.664   | 1330.419  | 622.909   | 0.468 | -1.095 | 0.000 | 0.000 |
| FBgn0036727 | 113.219   | 154.226   | 72.213    | 0.468 | -1.095 | 0.000 | 0.003 |
| FBgn0051360 | 388.402   | 529.068   | 247.736   | 0.468 | -1.095 | 0.000 | 0.001 |
| FBgn0034660 | 176.653   | 240.594   | 112.712   | 0.468 | -1.094 | 0.000 | 0.001 |
| FBgn0031717 | 385.375   | 524.743   | 246.008   | 0.469 | -1.093 | 0.013 | 0.044 |
| FBgn0032949 | 1304.476  | 1775.941  | 833.011   | 0.469 | -1.092 | 0.000 | 0.000 |
| FBgn0037149 | 101.325   | 137.852   | 64.798    | 0.470 | -1.089 | 0.010 | 0.034 |
| FBgn0023216 | 318.976   | 433.845   | 204.107   | 0.470 | -1.088 | 0.000 | 0.001 |
| FBgn0037087 | 955.969   | 1300.210  | 611.727   | 0.470 | -1.088 | 0.000 | 0.001 |
| FBgn0005322 | 735.525   | 1000.291  | 470.760   | 0.471 | -1.087 | 0.000 | 0.000 |
| FBgn0032881 | 742.705   | 1009.683  | 475.727   | 0.471 | -1.086 | 0.003 | 0.013 |
| FBgn0004087 | 208.686   | 283.647   | 133.726   | 0.471 | -1.085 | 0.000 | 0.002 |
| FBgn0011747 | 875.881   | 1190.337  | 561.425   | 0.472 | -1.084 | 0.000 | 0.001 |
| FBgn0015777 | 5224.620  | 7099.998  | 3349.242  | 0.472 | -1.084 | 0.002 | 0.011 |
| FBgn0262955 | 744.682   | 1011.819  | 477.546   | 0.472 | -1.083 | 0.000 | 0.000 |
| FBgn0038532 | 200.503   | 272.406   | 128.600   | 0.472 | -1.083 | 0.000 | 0.001 |
| FBgn0032691 | 167.217   | 227.175   | 107.258   | 0.472 | -1.083 | 0.001 | 0.003 |
| FBgn0034734 | 330.454   | 448.745   | 212.163   | 0.473 | -1.081 | 0.001 | 0.003 |
| FBgn0036811 | 419.187   | 569.126   | 269.248   | 0.473 | -1.080 | 0.000 | 0.001 |
| FBgn0030863 | 1036.582  | 1406.473  | 666.690   | 0.474 | -1.077 | 0.000 | 0.000 |
| FBgn0004607 | 1323.434  | 1795.072  | 851.796   | 0.475 | -1.075 | 0.000 | 0.001 |
| FBgn0037290 | 1928.505  | 2615.271  | 1241.739  | 0.475 | -1.075 | 0.000 | 0.000 |
| FBgn0033769 | 190.894   | 258.865   | 122.922   | 0.475 | -1.074 | 0.002 | 0.007 |

|             |          |          |          |       |        |       |       |
|-------------|----------|----------|----------|-------|--------|-------|-------|
| FBgn0038871 | 372.903  | 505.682  | 240.124  | 0.475 | -1.074 | 0.008 | 0.029 |
| FBgn0025574 | 1284.164 | 1741.341 | 826.988  | 0.475 | -1.074 | 0.000 | 0.000 |
| FBgn0037835 | 2740.052 | 3715.291 | 1764.813 | 0.475 | -1.074 | 0.000 | 0.001 |
| FBgn0002673 | 80.133   | 108.634  | 51.632   | 0.475 | -1.073 | 0.006 | 0.023 |
| FBgn0051717 | 295.585  | 400.656  | 190.514  | 0.476 | -1.072 | 0.000 | 0.002 |
| FBgn0004915 | 685.618  | 929.102  | 442.135  | 0.476 | -1.071 | 0.000 | 0.000 |
| FBgn0005561 | 198.304  | 268.703  | 127.905  | 0.476 | -1.071 | 0.016 | 0.050 |
| FBgn0032167 | 531.136  | 719.655  | 342.617  | 0.476 | -1.071 | 0.000 | 0.000 |
| FBgn0033661 | 748.784  | 1014.505 | 483.063  | 0.476 | -1.070 | 0.000 | 0.000 |
| FBgn0030418 | 224.562  | 304.197  | 144.928  | 0.476 | -1.070 | 0.000 | 0.002 |
| FBgn0051040 | 468.368  | 634.341  | 302.396  | 0.477 | -1.069 | 0.000 | 0.000 |
| FBgn0037743 | 654.407  | 886.294  | 422.520  | 0.477 | -1.069 | 0.000 | 0.000 |
| FBgn0037074 | 2330.103 | 3155.366 | 1504.840 | 0.477 | -1.068 | 0.000 | 0.001 |
| FBgn0035110 | 411.992  | 557.896  | 266.087  | 0.477 | -1.068 | 0.000 | 0.001 |
| FBgn0043457 | 672.288  | 910.056  | 434.520  | 0.477 | -1.067 | 0.004 | 0.017 |
| FBgn0034093 | 232.952  | 315.252  | 150.653  | 0.478 | -1.065 | 0.003 | 0.013 |
| FBgn0025740 | 166.788  | 225.686  | 107.890  | 0.478 | -1.065 | 0.012 | 0.041 |
| FBgn0038692 | 173.087  | 234.188  | 111.985  | 0.478 | -1.064 | 0.003 | 0.014 |
| FBgn0026261 | 337.979  | 457.254  | 218.704  | 0.478 | -1.064 | 0.002 | 0.010 |
| FBgn0004366 | 2087.220 | 2822.654 | 1351.786 | 0.479 | -1.062 | 0.001 | 0.005 |
| FBgn0010052 | 182.241  | 246.385  | 118.097  | 0.479 | -1.061 | 0.001 | 0.004 |
| FBgn0039055 | 929.084  | 1255.752 | 602.415  | 0.480 | -1.060 | 0.012 | 0.041 |
| FBgn0037737 | 208.316  | 281.507  | 135.125  | 0.480 | -1.059 | 0.006 | 0.024 |
| FBgn0033187 | 292.160  | 394.734  | 189.586  | 0.480 | -1.058 | 0.002 | 0.008 |
| FBgn0039350 | 1131.277 | 1527.495 | 735.059  | 0.481 | -1.055 | 0.000 | 0.000 |
| FBgn0034247 | 143.798  | 194.101  | 93.495   | 0.482 | -1.054 | 0.002 | 0.009 |
| FBgn0260940 | 593.611  | 801.191  | 386.030  | 0.482 | -1.053 | 0.015 | 0.048 |
| FBgn0032744 | 332.779  | 448.942  | 216.616  | 0.483 | -1.051 | 0.000 | 0.001 |
| FBgn0036980 | 1663.442 | 2243.852 | 1083.032 | 0.483 | -1.051 | 0.000 | 0.000 |
| FBgn0038547 | 144.671  | 195.083  | 94.259   | 0.483 | -1.049 | 0.005 | 0.020 |
| FBgn0038436 | 108.417  | 146.182  | 70.653   | 0.483 | -1.049 | 0.003 | 0.011 |
| FBgn0033434 | 581.399  | 783.809  | 378.989  | 0.484 | -1.048 | 0.000 | 0.000 |
| FBgn0037955 | 1605.238 | 2163.426 | 1047.049 | 0.484 | -1.047 | 0.000 | 0.000 |
| FBgn0004638 | 782.755  | 1054.920 | 510.589  | 0.484 | -1.047 | 0.000 | 0.000 |

|             |           |           |           |       |        |       |       |
|-------------|-----------|-----------|-----------|-------|--------|-------|-------|
| FBgn0039254 | 1021.746  | 1376.723  | 666.768   | 0.484 | -1.046 | 0.000 | 0.000 |
| FBgn0038564 | 192.056   | 258.765   | 125.347   | 0.484 | -1.046 | 0.001 | 0.003 |
| FBgn0039830 | 29792.355 | 40119.093 | 19465.617 | 0.485 | -1.043 | 0.005 | 0.021 |
| FBgn0026777 | 180.804   | 243.411   | 118.198   | 0.486 | -1.042 | 0.011 | 0.039 |
| FBgn0002542 | 79.592    | 107.152   | 52.033    | 0.486 | -1.042 | 0.005 | 0.019 |
| FBgn0011016 | 1325.342  | 1784.213  | 866.471   | 0.486 | -1.042 | 0.001 | 0.005 |
| FBgn0031351 | 63.770    | 85.847    | 41.693    | 0.486 | -1.042 | 0.008 | 0.028 |
| FBgn0032421 | 173.622   | 233.670   | 113.574   | 0.486 | -1.041 | 0.001 | 0.003 |
| FBgn0035891 | 90.976    | 122.439   | 59.514    | 0.486 | -1.041 | 0.004 | 0.016 |
| FBgn0033899 | 404.658   | 544.567   | 264.749   | 0.486 | -1.040 | 0.000 | 0.001 |
| FBgn0002905 | 118.130   | 158.956   | 77.303    | 0.486 | -1.040 | 0.002 | 0.010 |
| FBgn0037347 | 856.142   | 1151.948  | 560.335   | 0.486 | -1.040 | 0.000 | 0.000 |
| FBgn0086254 | 2332.945  | 3138.977  | 1526.912  | 0.486 | -1.040 | 0.000 | 0.000 |
| FBgn0063498 | 109.183   | 146.852   | 71.515    | 0.487 | -1.038 | 0.001 | 0.006 |
| FBgn0036927 | 4394.895  | 5911.109  | 2878.682  | 0.487 | -1.038 | 0.000 | 0.000 |
| FBgn0026433 | 259.054   | 348.412   | 169.696   | 0.487 | -1.038 | 0.000 | 0.002 |
| FBgn0036449 | 704.956   | 948.088   | 461.825   | 0.487 | -1.038 | 0.000 | 0.002 |
| FBgn0002924 | 209.738   | 282.061   | 137.414   | 0.487 | -1.037 | 0.000 | 0.003 |
| FBgn0262509 | 1061.797  | 1427.640  | 695.953   | 0.487 | -1.037 | 0.000 | 0.000 |
| FBgn0250848 | 1831.756  | 2461.939  | 1201.573  | 0.488 | -1.035 | 0.000 | 0.000 |
| FBgn0037120 | 1141.695  | 1533.832  | 749.558   | 0.489 | -1.033 | 0.000 | 0.000 |
| FBgn0020300 | 94.684    | 127.196   | 62.173    | 0.489 | -1.033 | 0.003 | 0.012 |
| FBgn0086475 | 312.223   | 419.370   | 205.076   | 0.489 | -1.032 | 0.000 | 0.002 |
| FBgn0030706 | 3786.391  | 5085.684  | 2487.098  | 0.489 | -1.032 | 0.011 | 0.038 |
| FBgn0000370 | 11203.065 | 15038.457 | 7367.673  | 0.490 | -1.029 | 0.000 | 0.000 |
| FBgn0038601 | 351.103   | 471.230   | 230.976   | 0.490 | -1.029 | 0.000 | 0.001 |
| FBgn0052475 | 373.639   | 501.346   | 245.933   | 0.491 | -1.028 | 0.001 | 0.007 |
| FBgn0027568 | 1054.704  | 1413.822  | 695.586   | 0.492 | -1.023 | 0.000 | 0.003 |
| FBgn0052448 | 277.968   | 372.542   | 183.393   | 0.492 | -1.022 | 0.001 | 0.004 |
| FBgn0026378 | 284.886   | 381.788   | 187.985   | 0.492 | -1.022 | 0.002 | 0.011 |
| FBgn0038327 | 395.911   | 530.560   | 261.262   | 0.492 | -1.022 | 0.000 | 0.001 |
| FBgn0052441 | 1268.755  | 1700.022  | 837.488   | 0.493 | -1.021 | 0.000 | 0.000 |
| FBgn0051713 | 652.552   | 874.241   | 430.863   | 0.493 | -1.021 | 0.002 | 0.008 |
| FBgn0038279 | 344.507   | 461.531   | 227.483   | 0.493 | -1.021 | 0.003 | 0.012 |

|             |          |           |          |       |        |       |       |
|-------------|----------|-----------|----------|-------|--------|-------|-------|
| FBgn0024230 | 365.776  | 489.804   | 241.748  | 0.494 | -1.019 | 0.002 | 0.008 |
| FBgn0036126 | 127.965  | 171.284   | 84.646   | 0.494 | -1.017 | 0.003 | 0.011 |
| FBgn0028468 | 339.134  | 453.938   | 224.331  | 0.494 | -1.017 | 0.000 | 0.002 |
| FBgn0039297 | 94.776   | 126.846   | 62.707   | 0.494 | -1.016 | 0.002 | 0.011 |
| FBgn0035517 | 394.305  | 527.714   | 260.896  | 0.494 | -1.016 | 0.010 | 0.035 |
| FBgn0259742 | 182.246  | 243.768   | 120.724  | 0.495 | -1.014 | 0.001 | 0.004 |
| FBgn0260939 | 570.857  | 763.278   | 378.436  | 0.496 | -1.012 | 0.000 | 0.001 |
| FBgn0004227 | 1965.267 | 2626.019  | 1304.516 | 0.497 | -1.009 | 0.000 | 0.000 |
| FBgn0039467 | 190.224  | 254.172   | 126.276  | 0.497 | -1.009 | 0.001 | 0.004 |
| FBgn0027948 | 3318.574 | 4432.273  | 2204.874 | 0.497 | -1.007 | 0.000 | 0.000 |
| FBgn0036764 | 248.061  | 331.179   | 164.943  | 0.498 | -1.006 | 0.001 | 0.003 |
| FBgn0004629 | 8131.668 | 10855.440 | 5407.895 | 0.498 | -1.005 | 0.007 | 0.025 |
| FBgn0034275 | 164.110  | 219.065   | 109.156  | 0.498 | -1.005 | 0.001 | 0.007 |
| FBgn0261791 | 719.649  | 960.622   | 478.677  | 0.498 | -1.005 | 0.003 | 0.012 |
| FBgn0015924 | 1607.359 | 2145.267  | 1069.450 | 0.499 | -1.004 | 0.000 | 0.000 |
| FBgn0034564 | 130.802  | 174.530   | 87.075   | 0.499 | -1.003 | 0.002 | 0.009 |
| FBgn0053113 | 9382.076 | 12517.715 | 6246.436 | 0.499 | -1.003 | 0.000 | 0.000 |
| FBgn0039864 | 543.105  | 724.364   | 361.846  | 0.500 | -1.001 | 0.012 | 0.040 |
| FBgn0035649 | 497.722  | 663.786   | 331.658  | 0.500 | -1.001 | 0.001 | 0.003 |
| FBgn0011584 | 3660.184 | 4880.615  | 2439.754 | 0.500 | -1.000 | 0.000 | 0.002 |
| FBgn0033015 | 392.013  | 522.689   | 261.337  | 0.500 | -1.000 | 0.000 | 0.002 |
| FBgn0032727 | 452.254  | 602.844   | 301.663  | 0.500 | -0.999 | 0.000 | 0.001 |
| FBgn0000330 | 855.206  | 1139.673  | 570.738  | 0.501 | -0.998 | 0.005 | 0.021 |
| FBgn0031268 | 327.699  | 436.388   | 219.010  | 0.502 | -0.995 | 0.000 | 0.002 |
| FBgn0030629 | 545.066  | 725.603   | 364.528  | 0.502 | -0.993 | 0.000 | 0.001 |
| FBgn0263199 | 2686.474 | 3576.145  | 1796.803 | 0.502 | -0.993 | 0.000 | 0.000 |
| FBgn0011241 | 213.124  | 283.677   | 142.571  | 0.503 | -0.993 | 0.012 | 0.041 |
| FBgn0031990 | 3057.328 | 4068.828  | 2045.827 | 0.503 | -0.992 | 0.000 | 0.000 |
| FBgn0031540 | 59.282   | 78.868    | 39.697   | 0.503 | -0.990 | 0.012 | 0.040 |
| FBgn0024833 | 1192.598 | 1586.230  | 798.966  | 0.504 | -0.989 | 0.001 | 0.003 |
| FBgn0031484 | 292.041  | 388.417   | 195.665  | 0.504 | -0.989 | 0.000 | 0.003 |
| FBgn0035911 | 534.561  | 710.905   | 358.218  | 0.504 | -0.989 | 0.000 | 0.001 |
| FBgn0030687 | 307.127  | 408.212   | 206.043  | 0.505 | -0.986 | 0.001 | 0.003 |
| FBgn0036335 | 280.697  | 373.008   | 188.386  | 0.505 | -0.986 | 0.001 | 0.004 |

|             |           |           |           |       |        |       |       |
|-------------|-----------|-----------|-----------|-------|--------|-------|-------|
| FBgn0036053 | 1614.303  | 2144.415  | 1084.190  | 0.506 | -0.984 | 0.000 | 0.001 |
| FBgn0033038 | 579.248   | 769.297   | 389.199   | 0.506 | -0.983 | 0.000 | 0.001 |
| FBgn0000313 | 28053.842 | 37257.602 | 18850.083 | 0.506 | -0.983 | 0.000 | 0.000 |
| FBgn0051431 | 148.202   | 196.795   | 99.609    | 0.506 | -0.982 | 0.001 | 0.007 |
| FBgn0039868 | 224.272   | 297.635   | 150.909   | 0.507 | -0.980 | 0.001 | 0.004 |
| FBgn0032997 | 101.070   | 134.115   | 68.025    | 0.507 | -0.979 | 0.004 | 0.018 |
| FBgn0037714 | 492.633   | 653.655   | 331.611   | 0.507 | -0.979 | 0.000 | 0.001 |
| FBgn0037504 | 287.534   | 381.390   | 193.678   | 0.508 | -0.978 | 0.016 | 0.050 |
| FBgn0263599 | 1131.902  | 1500.751  | 763.052   | 0.508 | -0.976 | 0.000 | 0.001 |
| FBgn0015513 | 2531.919  | 3356.048  | 1707.791  | 0.509 | -0.975 | 0.000 | 0.001 |
| FBgn0030816 | 266.820   | 353.668   | 179.973   | 0.509 | -0.975 | 0.001 | 0.005 |
| FBgn0029113 | 822.184   | 1089.481  | 554.887   | 0.509 | -0.973 | 0.000 | 0.001 |
| FBgn0030588 | 160.675   | 212.696   | 108.654   | 0.511 | -0.969 | 0.002 | 0.010 |
| FBgn0030864 | 88.390    | 117.001   | 59.779    | 0.511 | -0.969 | 0.009 | 0.031 |
| FBgn0002719 | 21109.846 | 27922.933 | 14296.759 | 0.512 | -0.966 | 0.012 | 0.040 |
| FBgn0036984 | 1048.374  | 1386.613  | 710.135   | 0.512 | -0.965 | 0.001 | 0.005 |
| FBgn0040056 | 557.316   | 736.702   | 377.931   | 0.513 | -0.963 | 0.002 | 0.008 |
| FBgn0036614 | 246.368   | 325.595   | 167.141   | 0.513 | -0.962 | 0.001 | 0.005 |
| FBgn0033569 | 159.621   | 210.921   | 108.322   | 0.514 | -0.961 | 0.002 | 0.009 |
| FBgn0034417 | 277.783   | 367.049   | 188.518   | 0.514 | -0.961 | 0.001 | 0.007 |
| FBgn0010382 | 102.577   | 135.533   | 69.620    | 0.514 | -0.961 | 0.006 | 0.023 |
| FBgn0013750 | 961.374   | 1270.169  | 652.579   | 0.514 | -0.961 | 0.001 | 0.007 |
| FBgn0053110 | 1028.396  | 1358.306  | 698.485   | 0.514 | -0.960 | 0.000 | 0.001 |
| FBgn0036945 | 163.920   | 216.489   | 111.351   | 0.514 | -0.959 | 0.012 | 0.041 |
| FBgn0036486 | 110.419   | 145.795   | 75.042    | 0.515 | -0.958 | 0.005 | 0.018 |
| FBgn0029789 | 504.599   | 666.206   | 342.993   | 0.515 | -0.958 | 0.000 | 0.002 |
| FBgn0037081 | 685.355   | 904.566   | 466.145   | 0.515 | -0.956 | 0.000 | 0.001 |
| FBgn0033579 | 79.530    | 104.930   | 54.129    | 0.516 | -0.955 | 0.010 | 0.034 |
| FBgn0051195 | 1059.718  | 1398.140  | 721.296   | 0.516 | -0.955 | 0.000 | 0.001 |
| FBgn0032162 | 283.358   | 373.812   | 192.905   | 0.516 | -0.954 | 0.001 | 0.004 |
| FBgn0000139 | 700.945   | 924.450   | 477.439   | 0.516 | -0.953 | 0.000 | 0.002 |
| FBgn0035083 | 1301.030  | 1714.044  | 888.017   | 0.518 | -0.949 | 0.002 | 0.008 |
| FBgn0005278 | 3848.451  | 5069.195  | 2627.708  | 0.518 | -0.948 | 0.001 | 0.003 |
| FBgn0015509 | 2696.961  | 3551.380  | 1842.542  | 0.519 | -0.947 | 0.000 | 0.001 |



|             |          |          |          |       |        |       |       |
|-------------|----------|----------|----------|-------|--------|-------|-------|
| FBgn0035271 | 269.152  | 354.308  | 183.996  | 0.519 | -0.945 | 0.008 | 0.029 |
| FBgn0032705 | 114.477  | 150.652  | 78.301   | 0.520 | -0.944 | 0.006 | 0.022 |
| FBgn0027582 | 690.894  | 909.200  | 472.588  | 0.520 | -0.944 | 0.000 | 0.002 |
| FBgn0051633 | 87.829   | 115.579  | 60.079   | 0.520 | -0.944 | 0.008 | 0.030 |
| FBgn0036893 | 352.386  | 463.696  | 241.076  | 0.520 | -0.944 | 0.000 | 0.002 |
| FBgn0034943 | 421.105  | 553.776  | 288.434  | 0.521 | -0.941 | 0.000 | 0.003 |
| FBgn0038680 | 246.854  | 324.508  | 169.201  | 0.521 | -0.940 | 0.001 | 0.006 |
| FBgn0263659 | 167.416  | 220.029  | 114.803  | 0.522 | -0.939 | 0.002 | 0.008 |
| FBgn0027359 | 908.964  | 1193.963 | 623.964  | 0.523 | -0.936 | 0.000 | 0.001 |
| FBgn0027070 | 424.760  | 557.706  | 291.813  | 0.523 | -0.934 | 0.000 | 0.003 |
| FBgn0039084 | 245.493  | 322.312  | 168.673  | 0.523 | -0.934 | 0.009 | 0.033 |
| FBgn0260741 | 132.639  | 174.113  | 91.164   | 0.524 | -0.933 | 0.004 | 0.015 |
| FBgn0067628 | 83.246   | 109.274  | 57.218   | 0.524 | -0.933 | 0.008 | 0.028 |
| FBgn0051155 | 313.246  | 411.174  | 215.318  | 0.524 | -0.933 | 0.001 | 0.006 |
| FBgn0032907 | 121.819  | 159.853  | 83.784   | 0.524 | -0.932 | 0.005 | 0.020 |
| FBgn0036018 | 311.661  | 408.769  | 214.554  | 0.525 | -0.930 | 0.005 | 0.019 |
| FBgn0052095 | 277.457  | 363.900  | 191.013  | 0.525 | -0.930 | 0.001 | 0.006 |
| FBgn0039727 | 300.292  | 393.814  | 206.769  | 0.525 | -0.929 | 0.001 | 0.004 |
| FBgn0031608 | 154.800  | 202.974  | 106.626  | 0.525 | -0.929 | 0.003 | 0.013 |
| FBgn0037011 | 471.196  | 617.558  | 324.834  | 0.526 | -0.927 | 0.001 | 0.003 |
| FBgn0037690 | 358.935  | 470.300  | 247.571  | 0.526 | -0.926 | 0.001 | 0.004 |
| FBgn0051344 | 739.033  | 968.136  | 509.929  | 0.527 | -0.925 | 0.000 | 0.002 |
| FBgn0035848 | 251.140  | 328.953  | 173.328  | 0.527 | -0.924 | 0.001 | 0.007 |
| FBgn0029863 | 674.946  | 884.054  | 465.839  | 0.527 | -0.924 | 0.000 | 0.002 |
| FBgn0052022 | 169.542  | 222.020  | 117.064  | 0.527 | -0.923 | 0.002 | 0.010 |
| FBgn0039942 | 261.210  | 341.980  | 180.440  | 0.528 | -0.922 | 0.001 | 0.007 |
| FBgn0039936 | 1438.520 | 1883.306 | 993.734  | 0.528 | -0.922 | 0.000 | 0.001 |
| FBgn0001185 | 285.746  | 374.091  | 197.402  | 0.528 | -0.922 | 0.014 | 0.045 |
| FBgn0033413 | 1826.583 | 2391.307 | 1261.858 | 0.528 | -0.922 | 0.000 | 0.001 |
| FBgn0002774 | 1648.217 | 2157.562 | 1138.873 | 0.528 | -0.922 | 0.000 | 0.002 |
| FBgn0034277 | 706.188  | 924.397  | 487.978  | 0.528 | -0.922 | 0.000 | 0.002 |
| FBgn0042138 | 2584.449 | 3382.720 | 1786.177 | 0.528 | -0.921 | 0.000 | 0.001 |
| FBgn0262467 | 408.971  | 535.262  | 282.680  | 0.528 | -0.921 | 0.006 | 0.024 |
| FBgn0032864 | 2069.213 | 2707.087 | 1431.339 | 0.529 | -0.919 | 0.000 | 0.001 |

|             |          |           |          |       |        |       |       |
|-------------|----------|-----------|----------|-------|--------|-------|-------|
| FBgn0020381 | 444.579  | 581.580   | 307.578  | 0.529 | -0.919 | 0.002 | 0.010 |
| FBgn0038577 | 589.173  | 770.692   | 407.655  | 0.529 | -0.919 | 0.009 | 0.033 |
| FBgn0040339 | 211.672  | 276.787   | 146.557  | 0.529 | -0.917 | 0.002 | 0.009 |
| FBgn0027583 | 400.626  | 523.828   | 277.425  | 0.530 | -0.917 | 0.004 | 0.018 |
| FBgn0010220 | 335.183  | 438.159   | 232.207  | 0.530 | -0.916 | 0.001 | 0.005 |
| FBgn0003732 | 957.339  | 1251.340  | 663.339  | 0.530 | -0.916 | 0.000 | 0.002 |
| FBgn0038666 | 221.442  | 289.342   | 153.543  | 0.531 | -0.914 | 0.013 | 0.042 |
| FBgn0035169 | 479.882  | 626.975   | 332.789  | 0.531 | -0.914 | 0.001 | 0.004 |
| FBgn0029525 | 241.798  | 315.858   | 167.738  | 0.531 | -0.913 | 0.007 | 0.027 |
| FBgn0029118 | 265.439  | 346.719   | 184.160  | 0.531 | -0.913 | 0.003 | 0.012 |
| FBgn0030625 | 192.182  | 251.008   | 133.356  | 0.531 | -0.912 | 0.002 | 0.008 |
| FBgn0029762 | 1408.319 | 1838.972  | 977.666  | 0.532 | -0.911 | 0.000 | 0.002 |
| FBgn0037117 | 327.036  | 426.952   | 227.120  | 0.532 | -0.911 | 0.001 | 0.005 |
| FBgn0033347 | 345.406  | 450.896   | 239.916  | 0.532 | -0.910 | 0.001 | 0.004 |
| FBgn0039863 | 1836.856 | 2397.023  | 1276.688 | 0.533 | -0.909 | 0.000 | 0.002 |
| FBgn0031985 | 2020.786 | 2636.676  | 1404.895 | 0.533 | -0.908 | 0.000 | 0.001 |
| FBgn0262517 | 754.476  | 984.376   | 524.577  | 0.533 | -0.908 | 0.000 | 0.002 |
| FBgn0036299 | 862.518  | 1125.134  | 599.903  | 0.533 | -0.907 | 0.000 | 0.002 |
| FBgn0039306 | 521.053  | 679.527   | 362.579  | 0.534 | -0.906 | 0.001 | 0.004 |
| FBgn0011230 | 6410.766 | 8359.136  | 4462.396 | 0.534 | -0.906 | 0.000 | 0.001 |
| FBgn0003444 | 177.223  | 230.994   | 123.452  | 0.534 | -0.904 | 0.002 | 0.011 |
| FBgn0004784 | 9801.068 | 12770.341 | 6831.796 | 0.535 | -0.902 | 0.000 | 0.001 |
| FBgn0040389 | 552.266  | 719.540   | 384.992  | 0.535 | -0.902 | 0.006 | 0.023 |
| FBgn0033891 | 215.163  | 280.175   | 150.151  | 0.536 | -0.900 | 0.003 | 0.012 |
| FBgn0033387 | 250.178  | 325.733   | 174.623  | 0.536 | -0.899 | 0.002 | 0.011 |
| FBgn0036842 | 377.083  | 490.939   | 263.226  | 0.536 | -0.899 | 0.001 | 0.005 |
| FBgn0038856 | 386.190  | 502.775   | 269.606  | 0.536 | -0.899 | 0.001 | 0.005 |
| FBgn0036850 | 103.553  | 134.789   | 72.317   | 0.537 | -0.898 | 0.008 | 0.030 |
| FBgn0031566 | 1096.249 | 1426.648  | 765.850  | 0.537 | -0.897 | 0.000 | 0.002 |
| FBgn0033985 | 306.103  | 398.351   | 213.856  | 0.537 | -0.897 | 0.008 | 0.030 |
| FBgn0001104 | 478.398  | 622.020   | 334.776  | 0.538 | -0.894 | 0.005 | 0.021 |
| FBgn0019938 | 458.384  | 595.954   | 320.814  | 0.538 | -0.893 | 0.001 | 0.005 |
| FBgn0261999 | 693.222  | 901.186   | 485.258  | 0.538 | -0.893 | 0.000 | 0.003 |
| FBgn0037063 | 3122.317 | 4058.615  | 2186.019 | 0.539 | -0.893 | 0.000 | 0.001 |

|             |          |          |          |       |        |       |       |
|-------------|----------|----------|----------|-------|--------|-------|-------|
| FBgn0003567 | 498.966  | 648.023  | 349.909  | 0.540 | -0.889 | 0.001 | 0.005 |
| FBgn0011581 | 3997.586 | 5191.547 | 2803.625 | 0.540 | -0.889 | 0.000 | 0.001 |
| FBgn0050392 | 289.093  | 375.371  | 202.815  | 0.540 | -0.888 | 0.001 | 0.006 |
| FBgn0015279 | 749.177  | 972.692  | 525.662  | 0.540 | -0.888 | 0.003 | 0.013 |
| FBgn0033556 | 600.801  | 779.986  | 421.617  | 0.541 | -0.888 | 0.000 | 0.003 |
| FBgn0052262 | 130.411  | 169.256  | 91.565   | 0.541 | -0.886 | 0.005 | 0.018 |
| FBgn0015663 | 93.049   | 120.697  | 65.401   | 0.542 | -0.884 | 0.013 | 0.042 |
| FBgn0035132 | 338.489  | 439.023  | 237.955  | 0.542 | -0.884 | 0.001 | 0.006 |
| FBgn0037963 | 1355.560 | 1758.076 | 953.043  | 0.542 | -0.883 | 0.000 | 0.002 |
| FBgn0015618 | 124.736  | 161.763  | 87.709   | 0.542 | -0.883 | 0.009 | 0.031 |
| FBgn0033905 | 330.229  | 428.054  | 232.403  | 0.543 | -0.881 | 0.001 | 0.007 |
| FBgn0039886 | 340.878  | 441.703  | 240.052  | 0.543 | -0.880 | 0.001 | 0.007 |
| FBgn0031630 | 422.930  | 547.992  | 297.867  | 0.544 | -0.879 | 0.001 | 0.005 |
| FBgn0039620 | 1618.830 | 2096.952 | 1140.709 | 0.544 | -0.878 | 0.000 | 0.002 |
| FBgn0033191 | 1050.451 | 1360.395 | 740.507  | 0.544 | -0.877 | 0.001 | 0.007 |
| FBgn0015793 | 678.147  | 877.994  | 478.300  | 0.545 | -0.876 | 0.009 | 0.031 |
| FBgn0036549 | 308.942  | 399.941  | 217.942  | 0.545 | -0.876 | 0.003 | 0.013 |
| FBgn0020312 | 792.979  | 1026.491 | 559.467  | 0.545 | -0.876 | 0.001 | 0.003 |
| FBgn0037808 | 6093.974 | 7887.063 | 4300.885 | 0.545 | -0.875 | 0.001 | 0.004 |
| FBgn0030260 | 235.253  | 304.435  | 166.071  | 0.546 | -0.874 | 0.002 | 0.010 |
| FBgn0036900 | 636.163  | 823.152  | 449.174  | 0.546 | -0.874 | 0.001 | 0.003 |
| FBgn0032216 | 622.760  | 805.245  | 440.274  | 0.547 | -0.871 | 0.001 | 0.005 |
| FBgn0030710 | 236.592  | 305.909  | 167.274  | 0.547 | -0.871 | 0.002 | 0.011 |
| FBgn0030320 | 310.457  | 401.307  | 219.607  | 0.547 | -0.870 | 0.002 | 0.008 |
| FBgn0003965 | 932.683  | 1205.320 | 660.045  | 0.548 | -0.869 | 0.001 | 0.004 |
| FBgn0029693 | 909.664  | 1175.546 | 643.781  | 0.548 | -0.869 | 0.000 | 0.003 |
| FBgn0051345 | 283.984  | 366.981  | 200.987  | 0.548 | -0.869 | 0.001 | 0.007 |
| FBgn0045761 | 836.016  | 1080.243 | 591.789  | 0.548 | -0.868 | 0.001 | 0.007 |
| FBgn0034474 | 1803.633 | 2330.430 | 1276.836 | 0.548 | -0.868 | 0.002 | 0.007 |
| FBgn0027784 | 219.068  | 283.037  | 155.100  | 0.548 | -0.868 | 0.003 | 0.013 |
| FBgn0085377 | 302.377  | 390.636  | 214.118  | 0.548 | -0.867 | 0.002 | 0.009 |
| FBgn0036560 | 815.552  | 1053.357 | 577.746  | 0.548 | -0.866 | 0.001 | 0.003 |
| FBgn0036574 | 130.653  | 168.742  | 92.563   | 0.549 | -0.866 | 0.008 | 0.029 |
| FBgn0036461 | 157.313  | 203.045  | 111.581  | 0.550 | -0.864 | 0.006 | 0.022 |

|             |          |          |          |       |        |       |       |
|-------------|----------|----------|----------|-------|--------|-------|-------|
| FBgn0023213 | 2682.823 | 3461.099 | 1904.548 | 0.550 | -0.862 | 0.001 | 0.005 |
| FBgn0025676 | 214.124  | 276.173  | 152.074  | 0.551 | -0.861 | 0.002 | 0.010 |
| FBgn0052702 | 539.614  | 695.875  | 383.353  | 0.551 | -0.860 | 0.001 | 0.005 |
| FBgn0010894 | 506.587  | 653.275  | 359.899  | 0.551 | -0.860 | 0.008 | 0.028 |
| FBgn0011260 | 517.134  | 666.872  | 367.395  | 0.551 | -0.860 | 0.001 | 0.005 |
| FBgn0030040 | 221.927  | 286.156  | 157.699  | 0.551 | -0.860 | 0.002 | 0.010 |
| FBgn0011232 | 677.881  | 874.026  | 481.737  | 0.551 | -0.859 | 0.002 | 0.010 |
| FBgn0030164 | 383.222  | 494.047  | 272.397  | 0.551 | -0.859 | 0.001 | 0.006 |
| FBgn0053123 | 961.713  | 1239.738 | 683.687  | 0.551 | -0.859 | 0.001 | 0.004 |
| FBgn0036973 | 107.334  | 138.328  | 76.340   | 0.552 | -0.858 | 0.014 | 0.045 |
| FBgn0035900 | 825.686  | 1063.578 | 587.795  | 0.553 | -0.856 | 0.001 | 0.004 |
| FBgn0262801 | 1449.192 | 1866.404 | 1031.979 | 0.553 | -0.855 | 0.001 | 0.003 |
| FBgn0033050 | 791.131  | 1018.835 | 563.427  | 0.553 | -0.855 | 0.001 | 0.005 |
| FBgn0038682 | 431.947  | 556.258  | 307.636  | 0.553 | -0.855 | 0.001 | 0.005 |
| FBgn0037684 | 699.988  | 901.128  | 498.848  | 0.554 | -0.853 | 0.003 | 0.014 |
| FBgn0000283 | 1893.190 | 2436.913 | 1349.466 | 0.554 | -0.853 | 0.001 | 0.003 |
| FBgn0035817 | 2158.452 | 2778.053 | 1538.851 | 0.554 | -0.852 | 0.000 | 0.003 |
| FBgn0026376 | 887.546  | 1142.216 | 632.877  | 0.554 | -0.852 | 0.001 | 0.004 |
| FBgn0037798 | 272.013  | 350.057  | 193.969  | 0.554 | -0.852 | 0.003 | 0.014 |
| FBgn0032703 | 373.942  | 481.205  | 266.678  | 0.554 | -0.852 | 0.001 | 0.007 |
| FBgn0037739 | 169.156  | 217.654  | 120.658  | 0.554 | -0.851 | 0.006 | 0.023 |
| FBgn0003268 | 130.142  | 167.421  | 92.863   | 0.555 | -0.850 | 0.012 | 0.041 |
| FBgn0034182 | 168.360  | 216.493  | 120.228  | 0.555 | -0.849 | 0.006 | 0.021 |
| FBgn0086909 | 554.402  | 712.784  | 396.020  | 0.556 | -0.848 | 0.001 | 0.005 |
| FBgn0001208 | 5527.895 | 7102.823 | 3952.967 | 0.557 | -0.845 | 0.000 | 0.003 |
| FBgn0039130 | 302.948  | 389.217  | 216.679  | 0.557 | -0.845 | 0.002 | 0.011 |
| FBgn0039712 | 886.090  | 1138.337 | 633.843  | 0.557 | -0.845 | 0.001 | 0.005 |
| FBgn0086690 | 2042.132 | 2623.079 | 1461.185 | 0.557 | -0.844 | 0.000 | 0.003 |
| FBgn0025185 | 201.388  | 258.676  | 144.100  | 0.557 | -0.844 | 0.005 | 0.019 |
| FBgn0052707 | 173.213  | 222.478  | 123.948  | 0.557 | -0.844 | 0.006 | 0.023 |
| FBgn0011836 | 290.172  | 372.542  | 207.802  | 0.558 | -0.842 | 0.002 | 0.011 |
| FBgn0038525 | 82.681   | 106.151  | 59.211   | 0.558 | -0.842 | 0.007 | 0.027 |
| FBgn0035985 | 4013.650 | 5152.304 | 2874.995 | 0.558 | -0.842 | 0.001 | 0.004 |
| FBgn0015269 | 2070.755 | 2657.065 | 1484.445 | 0.559 | -0.840 | 0.000 | 0.003 |

|             |          |           |          |       |        |       |       |
|-------------|----------|-----------|----------|-------|--------|-------|-------|
| FBgn0004580 | 2606.446 | 3344.138  | 1868.753 | 0.559 | -0.840 | 0.014 | 0.046 |
| FBgn0039602 | 303.669  | 389.534   | 217.804  | 0.559 | -0.839 | 0.002 | 0.009 |
| FBgn0039854 | 679.713  | 871.704   | 487.721  | 0.560 | -0.838 | 0.003 | 0.011 |
| FBgn0259229 | 372.186  | 477.264   | 267.108  | 0.560 | -0.837 | 0.002 | 0.011 |
| FBgn0031969 | 887.270  | 1137.726  | 636.814  | 0.560 | -0.837 | 0.001 | 0.005 |
| FBgn0010014 | 778.452  | 997.800   | 559.103  | 0.560 | -0.836 | 0.001 | 0.005 |
| FBgn0030425 | 1462.368 | 1873.216  | 1051.520 | 0.561 | -0.833 | 0.001 | 0.005 |
| FBgn0052225 | 1416.377 | 1812.816  | 1019.938 | 0.563 | -0.830 | 0.001 | 0.004 |
| FBgn0032635 | 469.121  | 600.369   | 337.873  | 0.563 | -0.829 | 0.002 | 0.009 |
| FBgn0034237 | 5863.838 | 7504.020  | 4223.657 | 0.563 | -0.829 | 0.001 | 0.003 |
| FBgn0259979 | 467.738  | 598.512   | 336.964  | 0.563 | -0.829 | 0.002 | 0.009 |
| FBgn0039207 | 650.081  | 831.829   | 468.334  | 0.563 | -0.829 | 0.014 | 0.045 |
| FBgn0038460 | 525.597  | 672.523   | 378.672  | 0.563 | -0.829 | 0.002 | 0.010 |
| FBgn0034716 | 893.247  | 1142.915  | 643.579  | 0.563 | -0.829 | 0.001 | 0.005 |
| FBgn0030041 | 7835.556 | 10022.318 | 5648.793 | 0.564 | -0.827 | 0.001 | 0.003 |
| FBgn0003210 | 1280.118 | 1637.315  | 922.922  | 0.564 | -0.827 | 0.001 | 0.004 |
| FBgn0036046 | 3360.159 | 4297.170  | 2423.148 | 0.564 | -0.827 | 0.001 | 0.003 |
| FBgn0040372 | 914.198  | 1169.118  | 659.278  | 0.564 | -0.826 | 0.001 | 0.005 |
| FBgn0012037 | 773.290  | 988.708   | 557.872  | 0.564 | -0.826 | 0.001 | 0.006 |
| FBgn0038639 | 329.159  | 420.822   | 237.497  | 0.564 | -0.825 | 0.010 | 0.036 |
| FBgn0038816 | 1175.686 | 1502.967  | 848.405  | 0.564 | -0.825 | 0.008 | 0.031 |
| FBgn0026737 | 332.346  | 424.838   | 239.853  | 0.565 | -0.825 | 0.003 | 0.014 |
| FBgn0023527 | 665.656  | 850.737   | 480.574  | 0.565 | -0.824 | 0.002 | 0.007 |
| FBgn0033526 | 113.066  | 144.477   | 81.655   | 0.565 | -0.823 | 0.014 | 0.046 |
| FBgn0010348 | 4948.738 | 6322.391  | 3575.085 | 0.565 | -0.822 | 0.002 | 0.007 |
| FBgn0020369 | 1462.604 | 1868.228  | 1056.980 | 0.566 | -0.822 | 0.001 | 0.006 |
| FBgn0031195 | 675.829  | 863.068   | 488.590  | 0.566 | -0.821 | 0.002 | 0.008 |
| FBgn0030743 | 997.885  | 1274.246  | 721.524  | 0.566 | -0.821 | 0.007 | 0.027 |
| FBgn0039915 | 258.266  | 329.783   | 186.750  | 0.566 | -0.820 | 0.003 | 0.012 |
| FBgn0032614 | 291.162  | 371.724   | 210.600  | 0.567 | -0.820 | 0.007 | 0.026 |
| FBgn0046687 | 166.840  | 212.987   | 120.692  | 0.567 | -0.819 | 0.008 | 0.030 |
| FBgn0017457 | 603.494  | 770.317   | 436.672  | 0.567 | -0.819 | 0.001 | 0.007 |
| FBgn0034179 | 1287.737 | 1643.676  | 931.797  | 0.567 | -0.819 | 0.001 | 0.006 |
| FBgn0034964 | 745.540  | 951.465   | 539.615  | 0.567 | -0.818 | 0.001 | 0.007 |

|             |          |          |          |       |        |       |       |
|-------------|----------|----------|----------|-------|--------|-------|-------|
| FBgn0001491 | 1028.543 | 1311.682 | 745.404  | 0.568 | -0.815 | 0.001 | 0.006 |
| FBgn0036146 | 978.418  | 1247.328 | 709.508  | 0.569 | -0.814 | 0.001 | 0.006 |
| FBgn0033989 | 290.892  | 370.827  | 210.957  | 0.569 | -0.814 | 0.006 | 0.024 |
| FBgn0034113 | 273.629  | 348.765  | 198.492  | 0.569 | -0.813 | 0.004 | 0.015 |
| FBgn0016059 | 1626.417 | 2072.441 | 1180.392 | 0.570 | -0.812 | 0.001 | 0.005 |
| FBgn0037895 | 622.390  | 792.899  | 451.880  | 0.570 | -0.811 | 0.002 | 0.009 |
| FBgn0050345 | 211.756  | 269.708  | 153.805  | 0.570 | -0.810 | 0.005 | 0.021 |
| FBgn0028699 | 1441.227 | 1835.474 | 1046.980 | 0.570 | -0.810 | 0.001 | 0.005 |
| FBgn0030344 | 494.493  | 629.610  | 359.377  | 0.571 | -0.809 | 0.002 | 0.009 |
| FBgn0031145 | 1581.532 | 2012.998 | 1150.067 | 0.571 | -0.808 | 0.001 | 0.006 |
| FBgn0033902 | 1814.046 | 2308.706 | 1319.387 | 0.571 | -0.807 | 0.001 | 0.005 |
| FBgn0032194 | 151.125  | 192.295  | 109.955  | 0.572 | -0.806 | 0.014 | 0.046 |
| FBgn0028663 | 1451.711 | 1846.907 | 1056.515 | 0.572 | -0.806 | 0.010 | 0.035 |
| FBgn0014032 | 382.031  | 486.015  | 278.047  | 0.572 | -0.806 | 0.003 | 0.012 |
| FBgn0003862 | 3292.658 | 4187.489 | 2397.827 | 0.573 | -0.804 | 0.001 | 0.005 |
| FBgn0036187 | 221.532  | 281.712  | 161.353  | 0.573 | -0.804 | 0.007 | 0.025 |
| FBgn0028744 | 628.994  | 799.725  | 458.263  | 0.573 | -0.803 | 0.002 | 0.009 |
| FBgn0032487 | 159.528  | 202.788  | 116.268  | 0.573 | -0.803 | 0.011 | 0.039 |
| FBgn0038928 | 131.458  | 167.097  | 95.819   | 0.573 | -0.802 | 0.013 | 0.042 |
| FBgn0259221 | 3147.475 | 4000.427 | 2294.523 | 0.574 | -0.802 | 0.001 | 0.007 |
| FBgn0034748 | 228.275  | 290.079  | 166.472  | 0.574 | -0.801 | 0.006 | 0.023 |
| FBgn0034345 | 2519.326 | 3201.316 | 1837.335 | 0.574 | -0.801 | 0.001 | 0.005 |
| FBgn0033088 | 272.236  | 345.915  | 198.558  | 0.574 | -0.801 | 0.005 | 0.021 |
| FBgn0040323 | 438.135  | 556.221  | 320.049  | 0.575 | -0.797 | 0.003 | 0.014 |
| FBgn0037142 | 704.155  | 893.694  | 514.616  | 0.576 | -0.796 | 0.002 | 0.009 |
| FBgn0023536 | 269.733  | 342.308  | 197.159  | 0.576 | -0.796 | 0.005 | 0.019 |
| FBgn0038418 | 266.460  | 338.120  | 194.800  | 0.576 | -0.796 | 0.005 | 0.019 |
| FBgn0031500 | 316.774  | 401.940  | 231.607  | 0.576 | -0.795 | 0.005 | 0.020 |
| FBgn0020503 | 5309.616 | 6736.323 | 3882.909 | 0.576 | -0.795 | 0.001 | 0.005 |
| FBgn0031573 | 179.165  | 227.298  | 131.032  | 0.576 | -0.795 | 0.009 | 0.031 |
| FBgn0032029 | 1322.037 | 1676.904 | 967.170  | 0.577 | -0.794 | 0.001 | 0.006 |
| FBgn0051100 | 299.577  | 379.983  | 219.171  | 0.577 | -0.794 | 0.004 | 0.016 |
| FBgn0027505 | 496.137  | 629.268  | 363.006  | 0.577 | -0.794 | 0.005 | 0.019 |
| FBgn0261671 | 5233.700 | 6637.441 | 3829.959 | 0.577 | -0.793 | 0.001 | 0.007 |

|             |          |          |          |       |        |       |       |
|-------------|----------|----------|----------|-------|--------|-------|-------|
| FBgn0037897 | 846.453  | 1073.319 | 619.587  | 0.577 | -0.793 | 0.002 | 0.009 |
| FBgn0035980 | 155.563  | 197.250  | 113.877  | 0.577 | -0.793 | 0.012 | 0.039 |
| FBgn0264324 | 2105.009 | 2668.891 | 1541.128 | 0.577 | -0.792 | 0.004 | 0.015 |
| FBgn0031977 | 528.880  | 670.516  | 387.244  | 0.578 | -0.792 | 0.003 | 0.012 |
| FBgn0044452 | 2489.853 | 3156.220 | 1823.486 | 0.578 | -0.791 | 0.001 | 0.006 |
| FBgn0005777 | 1045.495 | 1325.272 | 765.719  | 0.578 | -0.791 | 0.001 | 0.006 |
| FBgn0033160 | 1225.629 | 1553.564 | 897.694  | 0.578 | -0.791 | 0.001 | 0.007 |
| FBgn0002775 | 408.420  | 517.537  | 299.304  | 0.578 | -0.790 | 0.003 | 0.014 |
| FBgn0013272 | 7796.299 | 9878.987 | 5713.612 | 0.578 | -0.790 | 0.001 | 0.005 |
| FBgn0036272 | 1338.074 | 1694.625 | 981.522  | 0.579 | -0.788 | 0.001 | 0.007 |
| FBgn0025582 | 2905.254 | 3678.065 | 2132.442 | 0.580 | -0.786 | 0.001 | 0.006 |
| FBgn0038349 | 1382.945 | 1750.725 | 1015.165 | 0.580 | -0.786 | 0.002 | 0.007 |
| FBgn0033404 | 124.974  | 158.186  | 91.761   | 0.580 | -0.786 | 0.014 | 0.046 |
| FBgn0021795 | 2158.235 | 2731.397 | 1585.073 | 0.580 | -0.785 | 0.001 | 0.007 |
| FBgn0032120 | 607.920  | 769.360  | 446.481  | 0.580 | -0.785 | 0.002 | 0.009 |
| FBgn0034400 | 1880.574 | 2379.899 | 1381.249 | 0.580 | -0.785 | 0.001 | 0.007 |
| FBgn0027546 | 287.332  | 363.572  | 211.092  | 0.581 | -0.784 | 0.005 | 0.019 |
| FBgn0052428 | 353.515  | 447.297  | 259.733  | 0.581 | -0.784 | 0.013 | 0.044 |
| FBgn0260858 | 1400.627 | 1772.158 | 1029.096 | 0.581 | -0.784 | 0.002 | 0.009 |
| FBgn0034180 | 2176.243 | 2748.901 | 1603.584 | 0.583 | -0.778 | 0.009 | 0.032 |
| FBgn0036740 | 1068.076 | 1348.453 | 787.699  | 0.584 | -0.776 | 0.004 | 0.016 |
| FBgn0033712 | 188.905  | 238.431  | 139.379  | 0.585 | -0.775 | 0.010 | 0.036 |
| FBgn0043005 | 398.179  | 502.548  | 293.809  | 0.585 | -0.774 | 0.004 | 0.016 |
| FBgn0037199 | 2207.388 | 2785.049 | 1629.726 | 0.585 | -0.773 | 0.002 | 0.007 |
| FBgn0035028 | 430.879  | 543.461  | 318.296  | 0.586 | -0.772 | 0.012 | 0.040 |
| FBgn0039943 | 616.489  | 777.504  | 455.474  | 0.586 | -0.771 | 0.003 | 0.014 |
| FBgn0037215 | 1723.618 | 2173.449 | 1273.786 | 0.586 | -0.771 | 0.002 | 0.009 |
| FBgn0036909 | 163.590  | 206.257  | 120.923  | 0.586 | -0.770 | 0.013 | 0.043 |
| FBgn0261808 | 920.541  | 1160.525 | 680.557  | 0.586 | -0.770 | 0.002 | 0.011 |
| FBgn0086856 | 251.424  | 316.856  | 185.992  | 0.587 | -0.769 | 0.009 | 0.033 |
| FBgn0028690 | 960.207  | 1209.715 | 710.700  | 0.587 | -0.767 | 0.006 | 0.024 |
| FBgn0001179 | 340.434  | 428.750  | 252.119  | 0.588 | -0.766 | 0.004 | 0.017 |
| FBgn0037592 | 1076.795 | 1356.009 | 797.580  | 0.588 | -0.766 | 0.002 | 0.009 |
| FBgn0015609 | 3559.767 | 4481.695 | 2637.840 | 0.589 | -0.765 | 0.001 | 0.007 |

|             |           |           |           |       |        |       |       |
|-------------|-----------|-----------|-----------|-------|--------|-------|-------|
| FBgn0037578 | 195.447   | 246.065   | 144.830   | 0.589 | -0.765 | 0.012 | 0.040 |
| FBgn0051793 | 978.343   | 1231.300  | 725.386   | 0.589 | -0.763 | 0.008 | 0.030 |
| FBgn0031657 | 340.877   | 428.567   | 253.186   | 0.591 | -0.759 | 0.006 | 0.024 |
| FBgn0034261 | 1369.646  | 1721.882  | 1017.410  | 0.591 | -0.759 | 0.002 | 0.011 |
| FBgn0036974 | 1194.852  | 1502.083  | 887.620   | 0.591 | -0.759 | 0.002 | 0.009 |
| FBgn0035704 | 356.073   | 447.629   | 264.518   | 0.591 | -0.759 | 0.005 | 0.021 |
| FBgn0038183 | 671.328   | 843.620   | 499.036   | 0.592 | -0.757 | 0.014 | 0.046 |
| FBgn0036090 | 523.670   | 657.544   | 389.796   | 0.593 | -0.754 | 0.004 | 0.016 |
| FBgn0031458 | 221.315   | 277.889   | 164.741   | 0.593 | -0.754 | 0.010 | 0.034 |
| FBgn0085354 | 555.610   | 697.416   | 413.804   | 0.593 | -0.753 | 0.010 | 0.035 |
| FBgn0034398 | 13519.118 | 16968.352 | 10069.885 | 0.593 | -0.753 | 0.006 | 0.023 |
| FBgn0046876 | 330.083   | 414.193   | 245.973   | 0.594 | -0.752 | 0.007 | 0.027 |
| FBgn0040260 | 583.058   | 731.592   | 434.523   | 0.594 | -0.752 | 0.005 | 0.019 |
| FBgn0262167 | 388.467   | 487.313   | 289.622   | 0.594 | -0.751 | 0.004 | 0.017 |
| FBgn0027496 | 1109.625  | 1391.877  | 827.374   | 0.594 | -0.750 | 0.003 | 0.013 |
| FBgn0263979 | 406.817   | 510.208   | 303.425   | 0.595 | -0.750 | 0.006 | 0.022 |
| FBgn0027509 | 387.452   | 485.847   | 289.056   | 0.595 | -0.749 | 0.005 | 0.021 |
| FBgn0039789 | 895.032   | 1122.228  | 667.836   | 0.595 | -0.749 | 0.004 | 0.015 |
| FBgn0032156 | 4618.183  | 5790.106  | 3446.260  | 0.595 | -0.749 | 0.004 | 0.015 |
| FBgn0004456 | 575.310   | 721.092   | 429.528   | 0.596 | -0.747 | 0.003 | 0.014 |
| FBgn0024330 | 304.259   | 381.300   | 227.218   | 0.596 | -0.747 | 0.007 | 0.026 |
| FBgn0037241 | 448.222   | 561.577   | 334.868   | 0.596 | -0.746 | 0.004 | 0.015 |
| FBgn0030300 | 369.233   | 462.602   | 275.865   | 0.596 | -0.746 | 0.006 | 0.023 |
| FBgn0040308 | 190.252   | 238.334   | 142.170   | 0.597 | -0.745 | 0.013 | 0.043 |
| FBgn0052486 | 5091.783  | 6377.400  | 3806.165  | 0.597 | -0.745 | 0.002 | 0.009 |
| FBgn0261393 | 189.000   | 236.629   | 141.372   | 0.597 | -0.743 | 0.014 | 0.046 |
| FBgn0026380 | 1008.023  | 1261.706  | 754.339   | 0.598 | -0.742 | 0.014 | 0.046 |
| FBgn0010421 | 256.520   | 320.969   | 192.072   | 0.598 | -0.741 | 0.008 | 0.031 |
| FBgn0035064 | 310.172   | 388.000   | 232.343   | 0.599 | -0.740 | 0.009 | 0.034 |
| FBgn0039183 | 336.875   | 421.332   | 252.419   | 0.599 | -0.739 | 0.007 | 0.027 |
| FBgn0038581 | 429.654   | 537.294   | 322.014   | 0.599 | -0.739 | 0.008 | 0.029 |
| FBgn0032101 | 434.299   | 542.959   | 325.639   | 0.600 | -0.738 | 0.009 | 0.032 |
| FBgn0022787 | 2294.288  | 2867.582  | 1720.993  | 0.600 | -0.737 | 0.003 | 0.012 |
| FBgn0033421 | 311.368   | 389.035   | 233.701   | 0.601 | -0.735 | 0.009 | 0.033 |



|             |           |           |           |       |        |       |       |
|-------------|-----------|-----------|-----------|-------|--------|-------|-------|
| FBgn0052432 | 4184.794  | 5223.905  | 3145.683  | 0.602 | -0.732 | 0.003 | 0.011 |
| FBgn0039487 | 531.805   | 663.537   | 400.072   | 0.603 | -0.730 | 0.005 | 0.021 |
| FBgn0002937 | 1077.532  | 1344.374  | 810.689   | 0.603 | -0.730 | 0.003 | 0.014 |
| FBgn0052344 | 475.960   | 593.799   | 358.120   | 0.603 | -0.730 | 0.006 | 0.024 |
| FBgn0036257 | 1569.298  | 1957.830  | 1180.766  | 0.603 | -0.730 | 0.003 | 0.012 |
| FBgn0002938 | 57264.785 | 71425.480 | 43104.091 | 0.603 | -0.729 | 0.005 | 0.020 |
| FBgn0030851 | 215.680   | 268.975   | 162.385   | 0.604 | -0.728 | 0.015 | 0.049 |
| FBgn0033209 | 1109.886  | 1383.799  | 835.972   | 0.604 | -0.727 | 0.008 | 0.028 |
| FBgn0053523 | 1363.120  | 1699.475  | 1026.765  | 0.604 | -0.727 | 0.003 | 0.013 |
| FBgn0040324 | 355.652   | 443.359   | 267.944   | 0.604 | -0.727 | 0.006 | 0.024 |
| FBgn0263350 | 2940.342  | 3664.302  | 2216.383  | 0.605 | -0.725 | 0.003 | 0.011 |
| FBgn0038475 | 269.209   | 335.474   | 202.945   | 0.605 | -0.725 | 0.009 | 0.032 |
| FBgn0034367 | 383.285   | 477.606   | 288.964   | 0.605 | -0.725 | 0.008 | 0.028 |
| FBgn0034958 | 1148.660  | 1431.225  | 866.095   | 0.605 | -0.725 | 0.003 | 0.012 |
| FBgn0036239 | 1723.001  | 2146.776  | 1299.226  | 0.605 | -0.725 | 0.003 | 0.013 |
| FBgn0032679 | 1563.051  | 1947.185  | 1178.918  | 0.605 | -0.724 | 0.003 | 0.014 |
| FBgn0051321 | 488.498   | 608.543   | 368.454   | 0.605 | -0.724 | 0.006 | 0.022 |
| FBgn0016123 | 1083.668  | 1349.940  | 817.397   | 0.606 | -0.724 | 0.004 | 0.016 |
| FBgn0036846 | 271.710   | 338.448   | 204.972   | 0.606 | -0.724 | 0.011 | 0.038 |
| FBgn0041205 | 859.486   | 1070.576  | 648.397   | 0.606 | -0.723 | 0.011 | 0.037 |
| FBgn0000043 | 679.557   | 846.356   | 512.759   | 0.606 | -0.723 | 0.005 | 0.018 |
| FBgn0039137 | 786.744   | 979.566   | 593.921   | 0.606 | -0.722 | 0.005 | 0.020 |
| FBgn0033451 | 469.013   | 583.936   | 354.091   | 0.606 | -0.722 | 0.007 | 0.027 |
| FBgn0032230 | 331.027   | 412.123   | 249.930   | 0.606 | -0.722 | 0.009 | 0.031 |
| FBgn0039160 | 292.589   | 364.216   | 220.962   | 0.607 | -0.721 | 0.009 | 0.031 |
| FBgn0039249 | 509.895   | 634.508   | 385.283   | 0.607 | -0.720 | 0.007 | 0.025 |
| FBgn0033846 | 659.771   | 820.665   | 498.876   | 0.608 | -0.718 | 0.004 | 0.016 |
| FBgn0031233 | 544.602   | 677.327   | 411.877   | 0.608 | -0.718 | 0.005 | 0.021 |
| FBgn0001206 | 284.123   | 353.098   | 215.148   | 0.609 | -0.715 | 0.012 | 0.041 |
| FBgn0001276 | 327.439   | 406.748   | 248.131   | 0.610 | -0.713 | 0.013 | 0.043 |
| FBgn0039612 | 327.509   | 406.790   | 248.228   | 0.610 | -0.713 | 0.009 | 0.032 |
| FBgn0086134 | 1086.590  | 1349.053  | 824.126   | 0.611 | -0.711 | 0.005 | 0.020 |
| FBgn0037031 | 293.191   | 363.951   | 222.430   | 0.611 | -0.710 | 0.010 | 0.035 |
| FBgn0030612 | 539.617   | 669.716   | 409.518   | 0.611 | -0.710 | 0.007 | 0.027 |

|             |           |           |           |       |        |       |       |
|-------------|-----------|-----------|-----------|-------|--------|-------|-------|
| FBgn0033206 | 645.758   | 801.184   | 490.331   | 0.612 | -0.708 | 0.005 | 0.019 |
| FBgn0037447 | 595.155   | 738.125   | 452.186   | 0.613 | -0.707 | 0.008 | 0.028 |
| FBgn0035411 | 821.976   | 1019.319  | 624.634   | 0.613 | -0.707 | 0.005 | 0.021 |
| FBgn0259682 | 8339.582  | 10337.828 | 6341.336  | 0.613 | -0.705 | 0.003 | 0.013 |
| FBgn0039117 | 336.585   | 416.727   | 256.443   | 0.615 | -0.700 | 0.010 | 0.034 |
| FBgn0038897 | 312.914   | 387.408   | 238.420   | 0.615 | -0.700 | 0.010 | 0.036 |
| FBgn0038388 | 775.011   | 959.441   | 590.581   | 0.616 | -0.700 | 0.006 | 0.022 |
| FBgn0051388 | 288.501   | 357.099   | 219.904   | 0.616 | -0.699 | 0.011 | 0.038 |
| FBgn0051249 | 261.107   | 323.057   | 199.158   | 0.616 | -0.698 | 0.015 | 0.047 |
| FBgn0036741 | 1515.090  | 1873.927  | 1156.254  | 0.617 | -0.697 | 0.004 | 0.017 |
| FBgn0033352 | 1333.267  | 1648.843  | 1017.692  | 0.617 | -0.696 | 0.005 | 0.020 |
| FBgn0020372 | 3989.783  | 4928.291  | 3051.276  | 0.619 | -0.692 | 0.004 | 0.017 |
| FBgn0034053 | 351.041   | 433.436   | 268.645   | 0.620 | -0.690 | 0.013 | 0.043 |
| FBgn0016700 | 2809.588  | 3468.996  | 2150.179  | 0.620 | -0.690 | 0.005 | 0.019 |
| FBgn0037262 | 1130.261  | 1395.531  | 864.992   | 0.620 | -0.690 | 0.013 | 0.042 |
| FBgn0029899 | 2502.342  | 3089.571  | 1915.113  | 0.620 | -0.690 | 0.005 | 0.019 |
| FBgn0003248 | 6614.816  | 8165.458  | 5064.173  | 0.620 | -0.689 | 0.004 | 0.015 |
| FBgn0033984 | 853.957   | 1054.086  | 653.827   | 0.620 | -0.689 | 0.006 | 0.023 |
| FBgn0039152 | 6723.297  | 8298.856  | 5147.739  | 0.620 | -0.689 | 0.003 | 0.014 |
| FBgn0027518 | 314.505   | 388.157   | 240.854   | 0.621 | -0.688 | 0.014 | 0.046 |
| FBgn0024889 | 1950.050  | 2406.546  | 1493.554  | 0.621 | -0.688 | 0.006 | 0.022 |
| FBgn0032729 | 866.582   | 1069.155  | 664.008   | 0.621 | -0.687 | 0.008 | 0.030 |
| FBgn0039277 | 453.354   | 559.299   | 347.408   | 0.621 | -0.687 | 0.009 | 0.031 |
| FBgn0015218 | 3757.238  | 4635.124  | 2879.351  | 0.621 | -0.687 | 0.004 | 0.015 |
| FBgn0262109 | 65966.496 | 81326.729 | 50606.263 | 0.622 | -0.684 | 0.004 | 0.016 |
| FBgn0016687 | 5972.298  | 7361.233  | 4583.362  | 0.623 | -0.684 | 0.004 | 0.017 |
| FBgn0025726 | 3380.129  | 4163.695  | 2596.563  | 0.624 | -0.681 | 0.004 | 0.016 |
| FBgn0031897 | 1946.465  | 2397.318  | 1495.613  | 0.624 | -0.681 | 0.005 | 0.020 |
| FBgn0027599 | 387.590   | 477.316   | 297.864   | 0.624 | -0.680 | 0.010 | 0.034 |
| FBgn0034218 | 765.299   | 942.237   | 588.360   | 0.624 | -0.679 | 0.007 | 0.026 |
| FBgn0026370 | 2457.400  | 3024.672  | 1890.128  | 0.625 | -0.678 | 0.005 | 0.019 |
| FBgn0035770 | 12079.845 | 14859.499 | 9300.192  | 0.626 | -0.676 | 0.004 | 0.018 |
| FBgn0034029 | 278.752   | 342.624   | 214.879   | 0.627 | -0.673 | 0.015 | 0.048 |
| FBgn0028665 | 4020.675  | 4940.239  | 3101.110  | 0.628 | -0.672 | 0.005 | 0.021 |

|             |           |           |           |       |        |       |       |
|-------------|-----------|-----------|-----------|-------|--------|-------|-------|
| FBgn0026326 | 344.543   | 423.301   | 265.784   | 0.628 | -0.671 | 0.015 | 0.048 |
| FBgn0030740 | 1927.237  | 2367.705  | 1486.769  | 0.628 | -0.671 | 0.012 | 0.040 |
| FBgn0264305 | 540.281   | 663.727   | 416.835   | 0.628 | -0.671 | 0.010 | 0.036 |
| FBgn0250839 | 1947.608  | 2392.227  | 1502.988  | 0.628 | -0.671 | 0.007 | 0.025 |
| FBgn0038826 | 3969.431  | 4875.603  | 3063.258  | 0.628 | -0.671 | 0.005 | 0.020 |
| FBgn0022987 | 1693.458  | 2079.679  | 1307.238  | 0.629 | -0.670 | 0.005 | 0.019 |
| FBgn0011207 | 975.826   | 1197.720  | 753.932   | 0.629 | -0.668 | 0.008 | 0.030 |
| FBgn0004569 | 340.116   | 417.442   | 262.790   | 0.630 | -0.668 | 0.015 | 0.047 |
| FBgn0010435 | 5752.443  | 7059.894  | 4444.992  | 0.630 | -0.667 | 0.005 | 0.020 |
| FBgn0032455 | 905.511   | 1111.277  | 699.745   | 0.630 | -0.667 | 0.009 | 0.031 |
| FBgn0036005 | 330.144   | 405.144   | 255.145   | 0.630 | -0.667 | 0.015 | 0.047 |
| FBgn0053527 | 463.943   | 569.282   | 358.604   | 0.630 | -0.667 | 0.008 | 0.031 |
| FBgn0038293 | 2359.848  | 2895.088  | 1824.608  | 0.630 | -0.666 | 0.010 | 0.034 |
| FBgn0039219 | 594.324   | 729.091   | 459.558   | 0.630 | -0.666 | 0.012 | 0.040 |
| FBgn0052091 | 437.108   | 536.181   | 338.035   | 0.630 | -0.666 | 0.012 | 0.041 |
| FBgn0029088 | 837.094   | 1026.651  | 647.536   | 0.631 | -0.665 | 0.008 | 0.030 |
| FBgn0086347 | 692.952   | 849.747   | 536.157   | 0.631 | -0.664 | 0.009 | 0.033 |
| FBgn0036515 | 957.384   | 1173.939  | 740.829   | 0.631 | -0.664 | 0.009 | 0.031 |
| FBgn0016917 | 3245.006  | 3978.590  | 2511.421  | 0.631 | -0.664 | 0.006 | 0.023 |
| FBgn0039626 | 393.329   | 482.203   | 304.455   | 0.631 | -0.663 | 0.013 | 0.043 |
| FBgn0052672 | 8548.788  | 10479.800 | 6617.776  | 0.631 | -0.663 | 0.010 | 0.035 |
| FBgn0016715 | 868.816   | 1064.617  | 673.015   | 0.632 | -0.662 | 0.015 | 0.049 |
| FBgn0263973 | 412.333   | 505.087   | 319.579   | 0.633 | -0.660 | 0.012 | 0.040 |
| FBgn0043362 | 3246.048  | 3975.586  | 2516.511  | 0.633 | -0.660 | 0.006 | 0.023 |
| FBgn0051118 | 462.635   | 566.554   | 358.717   | 0.633 | -0.659 | 0.014 | 0.046 |
| FBgn0040273 | 1050.878  | 1286.634  | 815.122   | 0.634 | -0.659 | 0.010 | 0.035 |
| FBgn0030030 | 1054.210  | 1290.541  | 817.880   | 0.634 | -0.658 | 0.009 | 0.033 |
| FBgn0001202 | 1836.771  | 2247.988  | 1425.555  | 0.634 | -0.657 | 0.008 | 0.028 |
| FBgn0250757 | 548.682   | 670.925   | 426.439   | 0.636 | -0.654 | 0.011 | 0.038 |
| FBgn0036262 | 17810.055 | 21771.299 | 13848.811 | 0.636 | -0.653 | 0.005 | 0.020 |
| FBgn0032136 | 13539.651 | 16549.062 | 10530.239 | 0.636 | -0.652 | 0.006 | 0.022 |
| FBgn0086532 | 1011.054  | 1235.391  | 786.716   | 0.637 | -0.651 | 0.009 | 0.033 |
| FBgn0033062 | 2178.183  | 2661.434  | 1694.931  | 0.637 | -0.651 | 0.006 | 0.023 |
| FBgn0034605 | 423.156   | 516.930   | 329.382   | 0.637 | -0.650 | 0.013 | 0.043 |

|             |           |           |           |       |        |       |       |
|-------------|-----------|-----------|-----------|-------|--------|-------|-------|
| FBgn0036666 | 1837.818  | 2243.714  | 1431.922  | 0.638 | -0.648 | 0.007 | 0.028 |
| FBgn0034162 | 2159.330  | 2633.726  | 1684.935  | 0.640 | -0.644 | 0.012 | 0.040 |
| FBgn0028954 | 745.813   | 909.383   | 582.243   | 0.640 | -0.643 | 0.013 | 0.042 |
| FBgn0034315 | 614.591   | 749.216   | 479.965   | 0.641 | -0.642 | 0.012 | 0.041 |
| FBgn0039156 | 920.387   | 1121.755  | 719.020   | 0.641 | -0.642 | 0.012 | 0.039 |
| FBgn0037138 | 8677.802  | 10567.541 | 6788.062  | 0.642 | -0.639 | 0.007 | 0.027 |
| FBgn0262707 | 747.800   | 910.604   | 584.997   | 0.642 | -0.638 | 0.013 | 0.042 |
| FBgn0039623 | 835.904   | 1017.249  | 654.560   | 0.643 | -0.636 | 0.012 | 0.040 |
| FBgn0030431 | 726.106   | 883.417   | 568.796   | 0.644 | -0.635 | 0.010 | 0.036 |
| FBgn0031231 | 976.205   | 1187.506  | 764.903   | 0.644 | -0.635 | 0.011 | 0.038 |
| FBgn0037470 | 1114.691  | 1355.484  | 873.898   | 0.645 | -0.633 | 0.011 | 0.037 |
| FBgn0002121 | 508.723   | 618.372   | 399.074   | 0.645 | -0.632 | 0.013 | 0.044 |
| FBgn0039114 | 7568.124  | 9191.814  | 5944.434  | 0.647 | -0.629 | 0.007 | 0.027 |
| FBgn0035111 | 791.459   | 961.249   | 621.669   | 0.647 | -0.629 | 0.012 | 0.039 |
| FBgn0032666 | 6375.649  | 7742.552  | 5008.747  | 0.647 | -0.628 | 0.009 | 0.031 |
| FBgn0015664 | 758.581   | 920.887   | 596.274   | 0.647 | -0.627 | 0.014 | 0.046 |
| FBgn0030672 | 3432.051  | 4165.101  | 2699.000  | 0.648 | -0.626 | 0.008 | 0.030 |
| FBgn0038721 | 723.087   | 877.145   | 569.030   | 0.649 | -0.624 | 0.012 | 0.040 |
| FBgn0032752 | 878.797   | 1065.495  | 692.100   | 0.650 | -0.622 | 0.015 | 0.048 |
| FBgn0025802 | 1003.309  | 1215.808  | 790.809   | 0.650 | -0.621 | 0.013 | 0.042 |
| FBgn0031842 | 2043.804  | 2475.353  | 1612.255  | 0.651 | -0.619 | 0.011 | 0.037 |
| FBgn0014906 | 1841.250  | 2230.016  | 1452.484  | 0.651 | -0.619 | 0.011 | 0.037 |
| FBgn0027515 | 809.034   | 978.598   | 639.470   | 0.653 | -0.614 | 0.015 | 0.049 |
| FBgn0036022 | 15454.592 | 18689.051 | 12220.134 | 0.654 | -0.613 | 0.011 | 0.037 |
| FBgn0010416 | 845.485   | 1022.318  | 668.651   | 0.654 | -0.613 | 0.014 | 0.045 |
| FBgn0085335 | 3365.127  | 4065.463  | 2664.790  | 0.655 | -0.609 | 0.012 | 0.041 |
| FBgn0260441 | 18537.567 | 22388.412 | 14686.721 | 0.656 | -0.608 | 0.010 | 0.035 |
| FBgn0037530 | 2215.412  | 2673.994  | 1756.830  | 0.657 | -0.606 | 0.014 | 0.046 |
| FBgn0051150 | 2880.080  | 3476.016  | 2284.144  | 0.657 | -0.606 | 0.012 | 0.039 |
| FBgn0030013 | 1018.496  | 1228.986  | 808.006   | 0.657 | -0.605 | 0.015 | 0.049 |
| FBgn0035526 | 2981.462  | 3597.455  | 2365.470  | 0.658 | -0.605 | 0.011 | 0.038 |
| FBgn0027562 | 1119.236  | 1349.421  | 889.051   | 0.659 | -0.602 | 0.015 | 0.049 |
| FBgn0036816 | 4269.487  | 5146.671  | 3392.303  | 0.659 | -0.601 | 0.012 | 0.041 |
| FBgn0010265 | 20103.283 | 24224.240 | 15982.325 | 0.660 | -0.600 | 0.011 | 0.037 |

|             |           |          |           |       |        |       |       |
|-------------|-----------|----------|-----------|-------|--------|-------|-------|
| FBgn0029663 | 1437.811  | 1730.662 | 1144.960  | 0.662 | -0.596 | 0.015 | 0.048 |
| FBgn0026252 | 3621.638  | 4352.814 | 2890.463  | 0.664 | -0.591 | 0.014 | 0.046 |
| FBgn0000163 | 2562.529  | 2049.596 | 3075.461  | 1.501 | 0.585  | 0.014 | 0.047 |
| FBgn0260657 | 8925.205  | 7137.190 | 10713.219 | 1.501 | 0.586  | 0.013 | 0.043 |
| FBgn0259111 | 5853.030  | 4679.681 | 7026.379  | 1.501 | 0.586  | 0.014 | 0.044 |
| FBgn0086443 | 3836.853  | 3067.444 | 4606.261  | 1.502 | 0.587  | 0.013 | 0.043 |
| FBgn0001308 | 3548.282  | 2836.590 | 4259.973  | 1.502 | 0.587  | 0.015 | 0.049 |
| FBgn0261532 | 2623.595  | 2096.606 | 3150.583  | 1.503 | 0.588  | 0.015 | 0.048 |
| FBgn0001218 | 10551.501 | 8426.366 | 12676.636 | 1.504 | 0.589  | 0.014 | 0.046 |
| FBgn0261550 | 3721.504  | 2971.797 | 4471.211  | 1.505 | 0.589  | 0.014 | 0.045 |
| FBgn0037261 | 3473.919  | 2773.044 | 4174.794  | 1.505 | 0.590  | 0.014 | 0.045 |
| FBgn0010548 | 4363.841  | 3482.460 | 5245.222  | 1.506 | 0.591  | 0.014 | 0.046 |
| FBgn0011785 | 2379.957  | 1898.337 | 2861.577  | 1.507 | 0.592  | 0.013 | 0.044 |
| FBgn0037891 | 3333.002  | 2658.200 | 4007.805  | 1.508 | 0.592  | 0.012 | 0.040 |
| FBgn0034644 | 5566.472  | 4438.369 | 6694.576  | 1.508 | 0.593  | 0.012 | 0.041 |
| FBgn0027554 | 2383.797  | 1898.668 | 2868.926  | 1.511 | 0.596  | 0.012 | 0.041 |
| FBgn0031883 | 7689.231  | 6121.764 | 9256.697  | 1.512 | 0.597  | 0.014 | 0.046 |
| FBgn0030306 | 2061.779  | 1641.451 | 2482.107  | 1.512 | 0.597  | 0.013 | 0.042 |
| FBgn0015790 | 5769.582  | 4592.912 | 6946.252  | 1.512 | 0.597  | 0.015 | 0.048 |
| FBgn0261564 | 3591.533  | 2858.850 | 4324.216  | 1.513 | 0.597  | 0.012 | 0.042 |
| FBgn0051217 | 1572.792  | 1251.921 | 1893.663  | 1.513 | 0.597  | 0.013 | 0.043 |
| FBgn0020887 | 1703.867  | 1356.252 | 2051.482  | 1.513 | 0.597  | 0.015 | 0.048 |
| FBgn0003386 | 2986.864  | 2377.294 | 3596.434  | 1.513 | 0.597  | 0.012 | 0.041 |
| FBgn0030087 | 9255.203  | 7365.019 | 11145.387 | 1.513 | 0.598  | 0.014 | 0.045 |
| FBgn0031052 | 1425.433  | 1134.243 | 1716.623  | 1.513 | 0.598  | 0.014 | 0.045 |
| FBgn0014009 | 4384.864  | 3488.507 | 5281.220  | 1.514 | 0.598  | 0.013 | 0.044 |
| FBgn0067864 | 2054.997  | 1634.796 | 2475.197  | 1.514 | 0.598  | 0.012 | 0.040 |
| FBgn0085423 | 3754.372  | 2986.450 | 4522.294  | 1.514 | 0.599  | 0.013 | 0.043 |
| FBgn0025680 | 5720.006  | 4549.570 | 6890.442  | 1.515 | 0.599  | 0.010 | 0.035 |
| FBgn0008635 | 4529.172  | 3601.606 | 5456.738  | 1.515 | 0.599  | 0.011 | 0.037 |
| FBgn0034585 | 1113.529  | 885.103  | 1341.955  | 1.516 | 0.600  | 0.015 | 0.048 |
| FBgn0051706 | 4838.223  | 3844.521 | 5831.926  | 1.517 | 0.601  | 0.012 | 0.041 |
| FBgn0039738 | 3952.749  | 3140.245 | 4765.253  | 1.517 | 0.602  | 0.012 | 0.040 |
| FBgn0260855 | 2199.962  | 1746.920 | 2653.005  | 1.519 | 0.603  | 0.015 | 0.047 |

|             |           |           |           |       |       |       |       |
|-------------|-----------|-----------|-----------|-------|-------|-------|-------|
| FBgn0024947 | 1773.423  | 1406.888  | 2139.958  | 1.521 | 0.605 | 0.012 | 0.040 |
| FBgn0027836 | 926.667   | 734.968   | 1118.365  | 1.522 | 0.606 | 0.014 | 0.046 |
| FBgn0030432 | 1355.492  | 1075.062  | 1635.922  | 1.522 | 0.606 | 0.011 | 0.038 |
| FBgn0033192 | 2478.958  | 1965.982  | 2991.935  | 1.522 | 0.606 | 0.013 | 0.044 |
| FBgn0037944 | 1698.977  | 1347.363  | 2050.591  | 1.522 | 0.606 | 0.013 | 0.044 |
| FBgn0025681 | 2713.556  | 2151.852  | 3275.260  | 1.522 | 0.606 | 0.012 | 0.041 |
| FBgn0024187 | 3020.833  | 2395.157  | 3646.510  | 1.522 | 0.606 | 0.011 | 0.039 |
| FBgn0030310 | 537.935   | 426.465   | 649.406   | 1.523 | 0.607 | 0.014 | 0.046 |
| FBgn0028496 | 4220.649  | 3345.688  | 5095.609  | 1.523 | 0.607 | 0.010 | 0.036 |
| FBgn0004465 | 845.191   | 669.943   | 1020.440  | 1.523 | 0.607 | 0.015 | 0.047 |
| FBgn0028695 | 2571.201  | 2036.531  | 3105.871  | 1.525 | 0.609 | 0.011 | 0.039 |
| FBgn0034049 | 780.981   | 618.563   | 943.399   | 1.525 | 0.609 | 0.015 | 0.049 |
| FBgn0011764 | 2421.024  | 1917.196  | 2924.852  | 1.526 | 0.609 | 0.012 | 0.040 |
| FBgn0030670 | 8057.468  | 6380.027  | 9734.910  | 1.526 | 0.610 | 0.010 | 0.036 |
| FBgn0260972 | 4051.361  | 3207.412  | 4895.309  | 1.526 | 0.610 | 0.010 | 0.034 |
| FBgn0031275 | 1243.854  | 984.644   | 1503.065  | 1.527 | 0.610 | 0.013 | 0.042 |
| FBgn0003261 | 22819.421 | 18058.512 | 27580.331 | 1.527 | 0.611 | 0.010 | 0.036 |
| FBgn0035153 | 899.814   | 711.798   | 1087.830  | 1.528 | 0.612 | 0.015 | 0.049 |
| FBgn0003204 | 4024.384  | 3183.401  | 4865.366  | 1.528 | 0.612 | 0.009 | 0.033 |
| FBgn0263220 | 9066.253  | 7169.473  | 10963.032 | 1.529 | 0.613 | 0.010 | 0.034 |
| FBgn0000581 | 4616.283  | 3650.468  | 5582.098  | 1.529 | 0.613 | 0.011 | 0.039 |
| FBgn0039776 | 1108.237  | 876.130   | 1340.345  | 1.530 | 0.613 | 0.011 | 0.038 |
| FBgn0031037 | 3638.369  | 2874.327  | 4402.411  | 1.532 | 0.615 | 0.010 | 0.035 |
| FBgn0029861 | 630.155   | 497.602   | 762.709   | 1.533 | 0.616 | 0.014 | 0.047 |
| FBgn0034886 | 2982.427  | 2355.061  | 3609.793  | 1.533 | 0.616 | 0.012 | 0.041 |
| FBgn0031260 | 1559.927  | 1231.743  | 1888.111  | 1.533 | 0.616 | 0.013 | 0.042 |
| FBgn0013759 | 11749.035 | 9277.108  | 14220.963 | 1.533 | 0.616 | 0.011 | 0.038 |
| FBgn0051660 | 2419.354  | 1909.949  | 2928.759  | 1.533 | 0.617 | 0.011 | 0.039 |
| FBgn0051119 | 571.182   | 450.912   | 691.453   | 1.533 | 0.617 | 0.016 | 0.050 |
| FBgn0000562 | 2098.697  | 1656.578  | 2540.816  | 1.534 | 0.617 | 0.010 | 0.035 |
| FBgn0013576 | 11933.420 | 9419.217  | 14447.623 | 1.534 | 0.617 | 0.010 | 0.035 |
| FBgn0260635 | 6165.275  | 4866.054  | 7464.496  | 1.534 | 0.617 | 0.008 | 0.029 |
| FBgn0261611 | 524.798   | 414.167   | 635.429   | 1.534 | 0.618 | 0.015 | 0.048 |
| FBgn0031047 | 2133.848  | 1683.742  | 2583.953  | 1.535 | 0.618 | 0.010 | 0.035 |

|             |           |           |           |       |       |       |       |
|-------------|-----------|-----------|-----------|-------|-------|-------|-------|
| FBgn0036106 | 19695.785 | 15539.170 | 23852.399 | 1.535 | 0.618 | 0.008 | 0.031 |
| FBgn0037472 | 805.690   | 635.387   | 975.993   | 1.536 | 0.619 | 0.013 | 0.042 |
| FBgn0264495 | 5198.414  | 4098.018  | 6298.811  | 1.537 | 0.620 | 0.010 | 0.035 |
| FBgn0019637 | 566.587   | 446.609   | 686.564   | 1.537 | 0.620 | 0.014 | 0.045 |
| FBgn0000575 | 2835.705  | 2235.134  | 3436.277  | 1.537 | 0.620 | 0.012 | 0.040 |
| FBgn0032394 | 1701.943  | 1341.376  | 2062.510  | 1.538 | 0.621 | 0.009 | 0.033 |
| FBgn0034946 | 969.724   | 763.978   | 1175.470  | 1.539 | 0.622 | 0.015 | 0.048 |
| FBgn0036446 | 953.277   | 750.917   | 1155.637  | 1.539 | 0.622 | 0.013 | 0.043 |
| FBgn0040660 | 5259.513  | 4141.759  | 6377.266  | 1.540 | 0.623 | 0.012 | 0.040 |
| FBgn0036616 | 1951.369  | 1536.543  | 2366.195  | 1.540 | 0.623 | 0.011 | 0.037 |
| FBgn0029837 | 1640.425  | 1291.636  | 1989.214  | 1.540 | 0.623 | 0.011 | 0.037 |
| FBgn0050122 | 3847.690  | 3029.385  | 4665.996  | 1.540 | 0.623 | 0.010 | 0.034 |
| FBgn0039601 | 912.442   | 718.345   | 1106.538  | 1.540 | 0.623 | 0.010 | 0.036 |
| FBgn0027589 | 1566.674  | 1233.407  | 1899.941  | 1.540 | 0.623 | 0.011 | 0.037 |
| FBgn0002930 | 7235.718  | 5695.920  | 8775.515  | 1.541 | 0.624 | 0.010 | 0.034 |
| FBgn0016693 | 3430.509  | 2700.423  | 4160.595  | 1.541 | 0.624 | 0.008 | 0.030 |
| FBgn0029706 | 960.078   | 755.752   | 1164.404  | 1.541 | 0.624 | 0.013 | 0.042 |
| FBgn0034789 | 6440.355  | 5069.589  | 7811.120  | 1.541 | 0.624 | 0.008 | 0.030 |
| FBgn0037653 | 1020.782  | 803.459   | 1238.105  | 1.541 | 0.624 | 0.011 | 0.039 |
| FBgn0026077 | 1050.160  | 826.535   | 1273.785  | 1.541 | 0.624 | 0.012 | 0.040 |
| FBgn0085388 | 2040.772  | 1605.101  | 2476.444  | 1.543 | 0.626 | 0.011 | 0.038 |
| FBgn0033485 | 1377.587  | 1083.439  | 1671.735  | 1.543 | 0.626 | 0.012 | 0.040 |
| FBgn0028479 | 4922.014  | 3870.625  | 5973.403  | 1.543 | 0.626 | 0.009 | 0.033 |
| FBgn0026575 | 3765.441  | 2960.906  | 4569.976  | 1.543 | 0.626 | 0.010 | 0.034 |
| FBgn0086450 | 1985.912  | 1561.322  | 2410.502  | 1.544 | 0.627 | 0.009 | 0.031 |
| FBgn0039507 | 1336.379  | 1050.436  | 1622.323  | 1.544 | 0.627 | 0.011 | 0.038 |
| FBgn0261618 | 14499.392 | 11396.584 | 17602.199 | 1.545 | 0.627 | 0.010 | 0.035 |
| FBgn0261046 | 2519.778  | 1980.495  | 3059.062  | 1.545 | 0.627 | 0.009 | 0.031 |
| FBgn0085370 | 2986.276  | 2346.414  | 3626.138  | 1.545 | 0.628 | 0.011 | 0.037 |
| FBgn0034567 | 606.643   | 476.427   | 736.860   | 1.547 | 0.629 | 0.015 | 0.047 |
| FBgn0034725 | 2983.383  | 2342.693  | 3624.073  | 1.547 | 0.629 | 0.010 | 0.034 |
| FBgn0005671 | 10774.596 | 8460.162  | 13089.029 | 1.547 | 0.630 | 0.008 | 0.030 |
| FBgn0040395 | 2574.874  | 2021.732  | 3128.015  | 1.547 | 0.630 | 0.009 | 0.031 |
| FBgn0031069 | 3942.297  | 3095.286  | 4789.308  | 1.547 | 0.630 | 0.009 | 0.031 |

|             |           |           |           |       |       |       |       |
|-------------|-----------|-----------|-----------|-------|-------|-------|-------|
| FBgn0085386 | 2175.061  | 1707.377  | 2642.745  | 1.548 | 0.630 | 0.010 | 0.035 |
| FBgn0034242 | 1875.105  | 1471.603  | 2278.608  | 1.548 | 0.631 | 0.011 | 0.038 |
| FBgn0261570 | 3527.002  | 2767.502  | 4286.502  | 1.549 | 0.631 | 0.008 | 0.029 |
| FBgn0016672 | 8824.802  | 6922.411  | 10727.193 | 1.550 | 0.632 | 0.006 | 0.024 |
| FBgn0044328 | 1114.891  | 874.421   | 1355.362  | 1.550 | 0.632 | 0.012 | 0.041 |
| FBgn0036997 | 798.962   | 626.312   | 971.612   | 1.551 | 0.633 | 0.011 | 0.037 |
| FBgn0033669 | 1800.999  | 1411.369  | 2190.630  | 1.552 | 0.634 | 0.009 | 0.034 |
| FBgn0263106 | 3480.196  | 2726.888  | 4233.503  | 1.553 | 0.635 | 0.009 | 0.032 |
| FBgn0051036 | 394.948   | 309.456   | 480.439   | 1.553 | 0.635 | 0.012 | 0.041 |
| FBgn0036488 | 1231.521  | 964.782   | 1498.259  | 1.553 | 0.635 | 0.011 | 0.038 |
| FBgn0032348 | 1307.535  | 1024.176  | 1590.895  | 1.553 | 0.635 | 0.011 | 0.037 |
| FBgn0261445 | 884.941   | 692.678   | 1077.203  | 1.555 | 0.637 | 0.009 | 0.031 |
| FBgn0020496 | 4126.723  | 3229.616  | 5023.831  | 1.556 | 0.637 | 0.009 | 0.031 |
| FBgn0259168 | 2193.125  | 1716.137  | 2670.113  | 1.556 | 0.638 | 0.011 | 0.037 |
| FBgn0038206 | 714.764   | 559.247   | 870.280   | 1.556 | 0.638 | 0.013 | 0.044 |
| FBgn0004914 | 2787.648  | 2180.550  | 3394.747  | 1.557 | 0.639 | 0.010 | 0.035 |
| FBgn0015283 | 2002.832  | 1566.503  | 2439.161  | 1.557 | 0.639 | 0.009 | 0.031 |
| FBgn0037356 | 764.712   | 598.062   | 931.363   | 1.557 | 0.639 | 0.011 | 0.038 |
| FBgn0000108 | 33152.792 | 25925.660 | 40379.924 | 1.558 | 0.639 | 0.009 | 0.032 |
| FBgn0040230 | 1346.988  | 1053.235  | 1640.741  | 1.558 | 0.640 | 0.009 | 0.033 |
| FBgn0039150 | 952.130   | 744.445   | 1159.816  | 1.558 | 0.640 | 0.009 | 0.033 |
| FBgn0038774 | 1520.358  | 1188.720  | 1851.995  | 1.558 | 0.640 | 0.008 | 0.030 |
| FBgn0010408 | 29997.060 | 23448.543 | 36545.578 | 1.559 | 0.640 | 0.011 | 0.037 |
| FBgn0041203 | 1752.033  | 1369.421  | 2134.645  | 1.559 | 0.640 | 0.009 | 0.033 |
| FBgn0025641 | 4757.510  | 3718.472  | 5796.549  | 1.559 | 0.640 | 0.007 | 0.026 |
| FBgn0022699 | 725.442   | 566.885   | 883.998   | 1.559 | 0.641 | 0.010 | 0.034 |
| FBgn0030761 | 830.810   | 649.092   | 1012.529  | 1.560 | 0.641 | 0.010 | 0.036 |
| FBgn0030433 | 418.941   | 327.230   | 510.653   | 1.561 | 0.642 | 0.012 | 0.040 |
| FBgn0030305 | 909.196   | 710.142   | 1108.250  | 1.561 | 0.642 | 0.009 | 0.033 |
| FBgn0034618 | 1768.034  | 1380.755  | 2155.313  | 1.561 | 0.642 | 0.009 | 0.033 |
| FBgn0003138 | 1538.446  | 1201.449  | 1875.444  | 1.561 | 0.642 | 0.008 | 0.031 |
| FBgn0024941 | 1979.450  | 1545.792  | 2413.108  | 1.561 | 0.643 | 0.009 | 0.033 |
| FBgn0036152 | 1467.612  | 1145.595  | 1789.629  | 1.562 | 0.644 | 0.008 | 0.030 |
| FBgn0039169 | 900.592   | 702.824   | 1098.360  | 1.563 | 0.644 | 0.011 | 0.038 |



|             |          |          |           |       |       |       |       |
|-------------|----------|----------|-----------|-------|-------|-------|-------|
| FBgn0037899 | 4289.995 | 3347.299 | 5232.691  | 1.563 | 0.645 | 0.007 | 0.027 |
| FBgn0028507 | 712.850  | 556.169  | 869.531   | 1.563 | 0.645 | 0.010 | 0.034 |
| FBgn0004133 | 988.685  | 771.281  | 1206.088  | 1.564 | 0.645 | 0.009 | 0.032 |
| FBgn0029819 | 1104.470 | 861.606  | 1347.333  | 1.564 | 0.645 | 0.008 | 0.029 |
| FBgn0035756 | 1526.031 | 1190.402 | 1861.659  | 1.564 | 0.645 | 0.009 | 0.033 |
| FBgn0010441 | 619.005  | 482.858  | 755.152   | 1.564 | 0.645 | 0.013 | 0.042 |
| FBgn0005659 | 1350.850 | 1053.737 | 1647.964  | 1.564 | 0.645 | 0.009 | 0.033 |
| FBgn0005649 | 3899.972 | 3042.073 | 4757.870  | 1.564 | 0.645 | 0.007 | 0.028 |
| FBgn0051908 | 1592.738 | 1241.964 | 1943.511  | 1.565 | 0.646 | 0.009 | 0.032 |
| FBgn0004795 | 1490.905 | 1162.360 | 1819.449  | 1.565 | 0.646 | 0.007 | 0.026 |
| FBgn0031836 | 6209.475 | 4841.052 | 7577.899  | 1.565 | 0.646 | 0.007 | 0.025 |
| FBgn0034959 | 2614.270 | 2037.986 | 3190.555  | 1.566 | 0.647 | 0.008 | 0.028 |
| FBgn0003165 | 4570.379 | 3562.603 | 5578.156  | 1.566 | 0.647 | 0.008 | 0.030 |
| FBgn0029755 | 651.554  | 507.700  | 795.408   | 1.567 | 0.648 | 0.013 | 0.042 |
| FBgn0262684 | 8481.803 | 6608.250 | 10355.357 | 1.567 | 0.648 | 0.008 | 0.029 |
| FBgn0000320 | 1593.303 | 1240.870 | 1945.736  | 1.568 | 0.649 | 0.008 | 0.028 |
| FBgn0036454 | 6284.294 | 4892.587 | 7676.001  | 1.569 | 0.650 | 0.007 | 0.028 |
| FBgn0028982 | 3844.447 | 2992.436 | 4696.457  | 1.569 | 0.650 | 0.007 | 0.025 |
| FBgn0038744 | 928.103  | 722.354  | 1133.853  | 1.570 | 0.650 | 0.009 | 0.033 |
| FBgn0038617 | 1138.959 | 886.179  | 1391.738  | 1.570 | 0.651 | 0.007 | 0.026 |
| FBgn0052264 | 8736.837 | 6796.173 | 10677.502 | 1.571 | 0.652 | 0.007 | 0.028 |
| FBgn0250869 | 1611.234 | 1253.134 | 1969.333  | 1.572 | 0.652 | 0.008 | 0.030 |
| FBgn0030261 | 1589.923 | 1236.430 | 1943.416  | 1.572 | 0.652 | 0.010 | 0.035 |
| FBgn0034923 | 531.284  | 413.065  | 649.504   | 1.572 | 0.653 | 0.011 | 0.038 |
| FBgn0053147 | 3002.347 | 2334.208 | 3670.486  | 1.572 | 0.653 | 0.006 | 0.023 |
| FBgn0037374 | 1236.299 | 960.792  | 1511.806  | 1.573 | 0.654 | 0.008 | 0.029 |
| FBgn0035824 | 552.387  | 429.278  | 675.495   | 1.574 | 0.654 | 0.012 | 0.041 |
| FBgn0031660 | 1137.214 | 883.686  | 1390.743  | 1.574 | 0.654 | 0.006 | 0.023 |
| FBgn0052700 | 545.739  | 424.068  | 667.411   | 1.574 | 0.654 | 0.012 | 0.042 |
| FBgn0023095 | 2700.307 | 2098.258 | 3302.356  | 1.574 | 0.654 | 0.009 | 0.032 |
| FBgn0026597 | 2119.565 | 1646.959 | 2592.170  | 1.574 | 0.654 | 0.007 | 0.027 |
| FBgn0030669 | 1436.817 | 1116.347 | 1757.287  | 1.574 | 0.655 | 0.007 | 0.026 |
| FBgn0040305 | 1047.968 | 814.048  | 1281.889  | 1.575 | 0.655 | 0.010 | 0.035 |
| FBgn0016038 | 854.338  | 663.574  | 1045.102  | 1.575 | 0.655 | 0.009 | 0.033 |

|             |           |           |           |       |       |       |       |
|-------------|-----------|-----------|-----------|-------|-------|-------|-------|
| FBgn0031356 | 800.418   | 621.686   | 979.151   | 1.575 | 0.655 | 0.008 | 0.029 |
| FBgn0028481 | 3419.959  | 2656.177  | 4183.740  | 1.575 | 0.655 | 0.006 | 0.023 |
| FBgn0027453 | 1407.065  | 1092.589  | 1721.541  | 1.576 | 0.656 | 0.008 | 0.028 |
| FBgn0036179 | 489.819   | 380.344   | 599.294   | 1.576 | 0.656 | 0.011 | 0.039 |
| FBgn0043903 | 1860.863  | 1444.284  | 2277.442  | 1.577 | 0.657 | 0.006 | 0.024 |
| FBgn0035696 | 1653.959  | 1283.693  | 2024.224  | 1.577 | 0.657 | 0.007 | 0.026 |
| FBgn0027084 | 1595.352  | 1238.023  | 1952.681  | 1.577 | 0.657 | 0.006 | 0.024 |
| FBgn0016926 | 4531.181  | 3516.190  | 5546.172  | 1.577 | 0.657 | 0.014 | 0.046 |
| FBgn0261086 | 541.054   | 419.787   | 662.320   | 1.578 | 0.658 | 0.012 | 0.041 |
| FBgn0263773 | 3565.910  | 2766.504  | 4365.315  | 1.578 | 0.658 | 0.008 | 0.031 |
| FBgn0035228 | 5247.695  | 4071.260  | 6424.131  | 1.578 | 0.658 | 0.006 | 0.022 |
| FBgn0030484 | 1951.549  | 1513.925  | 2389.173  | 1.578 | 0.658 | 0.006 | 0.023 |
| FBgn0032597 | 771.073   | 598.147   | 943.999   | 1.578 | 0.658 | 0.010 | 0.035 |
| FBgn0023388 | 4148.858  | 3218.402  | 5079.315  | 1.578 | 0.658 | 0.006 | 0.023 |
| FBgn0030314 | 431.086   | 334.398   | 527.773   | 1.578 | 0.658 | 0.012 | 0.040 |
| FBgn0037121 | 522.916   | 405.506   | 640.326   | 1.579 | 0.659 | 0.011 | 0.037 |
| FBgn0000524 | 357.114   | 276.925   | 437.303   | 1.579 | 0.659 | 0.014 | 0.046 |
| FBgn0037146 | 25837.462 | 20033.961 | 31640.963 | 1.579 | 0.659 | 0.006 | 0.023 |
| FBgn0031044 | 622.495   | 482.613   | 762.377   | 1.580 | 0.660 | 0.008 | 0.030 |
| FBgn0083963 | 1861.892  | 1443.394  | 2280.389  | 1.580 | 0.660 | 0.007 | 0.025 |
| FBgn0000482 | 815.005   | 631.747   | 998.264   | 1.580 | 0.660 | 0.009 | 0.031 |
| FBgn0263200 | 2895.309  | 2243.935  | 3546.684  | 1.581 | 0.660 | 0.006 | 0.023 |
| FBgn0051051 | 467.015   | 361.909   | 572.122   | 1.581 | 0.661 | 0.012 | 0.040 |
| FBgn0250786 | 4165.446  | 3227.562  | 5103.330  | 1.581 | 0.661 | 0.006 | 0.022 |
| FBgn0030555 | 2842.619  | 2202.096  | 3483.141  | 1.582 | 0.662 | 0.004 | 0.018 |
| FBgn0036511 | 5946.252  | 4605.830  | 7286.675  | 1.582 | 0.662 | 0.006 | 0.022 |
| FBgn0004852 | 2262.305  | 1752.329  | 2772.282  | 1.582 | 0.662 | 0.006 | 0.023 |
| FBgn0029766 | 4214.209  | 3262.833  | 5165.585  | 1.583 | 0.663 | 0.012 | 0.041 |
| FBgn0032515 | 2687.640  | 2080.311  | 3294.968  | 1.584 | 0.663 | 0.006 | 0.022 |
| FBgn0027655 | 4191.548  | 3244.133  | 5138.962  | 1.584 | 0.664 | 0.005 | 0.021 |
| FBgn0028274 | 772.152   | 597.548   | 946.756   | 1.584 | 0.664 | 0.009 | 0.031 |
| FBgn0031036 | 504.870   | 390.572   | 619.168   | 1.585 | 0.665 | 0.012 | 0.040 |
| FBgn0030792 | 1264.956  | 978.573   | 1551.339  | 1.585 | 0.665 | 0.006 | 0.024 |
| FBgn0039537 | 1698.578  | 1313.817  | 2083.339  | 1.586 | 0.665 | 0.006 | 0.023 |

|             |           |           |           |       |       |       |       |
|-------------|-----------|-----------|-----------|-------|-------|-------|-------|
| FBgn0264449 | 4992.393  | 3860.785  | 6124.001  | 1.586 | 0.666 | 0.006 | 0.023 |
| FBgn0020767 | 2704.404  | 2090.199  | 3318.610  | 1.588 | 0.667 | 0.006 | 0.024 |
| FBgn0038250 | 917.746   | 709.156   | 1126.337  | 1.588 | 0.667 | 0.006 | 0.023 |
| FBgn0001291 | 1239.448  | 957.484   | 1521.413  | 1.589 | 0.668 | 0.007 | 0.025 |
| FBgn0036875 | 984.211   | 760.234   | 1208.188  | 1.589 | 0.668 | 0.007 | 0.025 |
| FBgn0039857 | 36569.069 | 28243.752 | 44894.387 | 1.590 | 0.669 | 0.007 | 0.026 |
| FBgn0031955 | 496.117   | 383.106   | 609.128   | 1.590 | 0.669 | 0.011 | 0.038 |
| FBgn0001965 | 2705.736  | 2089.091  | 3322.380  | 1.590 | 0.669 | 0.005 | 0.020 |
| FBgn0052296 | 1869.712  | 1443.513  | 2295.912  | 1.591 | 0.669 | 0.006 | 0.024 |
| FBgn0000439 | 685.707   | 529.213   | 842.201   | 1.591 | 0.670 | 0.010 | 0.034 |
| FBgn0004101 | 422.493   | 326.027   | 518.959   | 1.592 | 0.671 | 0.012 | 0.039 |
| FBgn0035639 | 1291.549  | 996.559   | 1586.540  | 1.592 | 0.671 | 0.006 | 0.024 |
| FBgn0002023 | 507.556   | 391.555   | 623.557   | 1.593 | 0.671 | 0.013 | 0.043 |
| FBgn0010414 | 612.151   | 472.239   | 752.063   | 1.593 | 0.671 | 0.009 | 0.031 |
| FBgn0030631 | 770.078   | 593.979   | 946.177   | 1.593 | 0.672 | 0.006 | 0.024 |
| FBgn0263416 | 4255.632  | 3282.401  | 5228.862  | 1.593 | 0.672 | 0.006 | 0.023 |
| FBgn0031414 | 10472.624 | 8076.122  | 12869.126 | 1.593 | 0.672 | 0.004 | 0.017 |
| FBgn0262508 | 10449.794 | 8057.034  | 12842.554 | 1.594 | 0.673 | 0.004 | 0.018 |
| FBgn0038467 | 1164.898  | 898.041   | 1431.755  | 1.594 | 0.673 | 0.006 | 0.024 |
| FBgn0002917 | 3391.506  | 2614.497  | 4168.515  | 1.594 | 0.673 | 0.005 | 0.020 |
| FBgn0005694 | 1929.326  | 1487.243  | 2371.409  | 1.595 | 0.673 | 0.007 | 0.027 |
| FBgn0262714 | 1981.398  | 1527.253  | 2435.542  | 1.595 | 0.673 | 0.005 | 0.021 |
| FBgn0061515 | 3356.671  | 2587.269  | 4126.073  | 1.595 | 0.673 | 0.008 | 0.028 |
| FBgn0036746 | 2528.604  | 1948.967  | 3108.241  | 1.595 | 0.673 | 0.006 | 0.024 |
| FBgn0031800 | 1159.963  | 893.847   | 1426.079  | 1.595 | 0.674 | 0.005 | 0.020 |
| FBgn0259481 | 8059.765  | 6209.165  | 9910.366  | 1.596 | 0.675 | 0.007 | 0.026 |
| FBgn0036805 | 2422.613  | 1866.353  | 2978.873  | 1.596 | 0.675 | 0.005 | 0.021 |
| FBgn0260990 | 2063.085  | 1589.085  | 2537.084  | 1.597 | 0.675 | 0.005 | 0.019 |
| FBgn0010303 | 3670.440  | 2826.775  | 4514.105  | 1.597 | 0.675 | 0.005 | 0.021 |
| FBgn0035997 | 820.811   | 631.840   | 1009.782  | 1.598 | 0.676 | 0.008 | 0.031 |
| FBgn0031381 | 7639.817  | 5880.529  | 9399.106  | 1.598 | 0.677 | 0.005 | 0.019 |
| FBgn0030769 | 285.698   | 219.873   | 351.523   | 1.599 | 0.677 | 0.015 | 0.047 |
| FBgn0023212 | 4988.687  | 3838.989  | 6138.385  | 1.599 | 0.677 | 0.015 | 0.049 |
| FBgn0051462 | 1015.225  | 781.241   | 1249.209  | 1.599 | 0.677 | 0.007 | 0.025 |

|             |           |           |           |       |       |       |       |
|-------------|-----------|-----------|-----------|-------|-------|-------|-------|
| FBgn0001227 | 387.777   | 298.383   | 477.171   | 1.599 | 0.677 | 0.011 | 0.037 |
| FBgn0030505 | 6433.240  | 4948.671  | 7917.809  | 1.600 | 0.678 | 0.005 | 0.020 |
| FBgn0029893 | 3193.041  | 2455.696  | 3930.385  | 1.601 | 0.679 | 0.005 | 0.020 |
| FBgn0034753 | 10190.688 | 7835.499  | 12545.877 | 1.601 | 0.679 | 0.012 | 0.041 |
| FBgn0034909 | 1813.826  | 1394.472  | 2233.179  | 1.601 | 0.679 | 0.004 | 0.017 |
| FBgn0263102 | 7247.252  | 5569.924  | 8924.580  | 1.602 | 0.680 | 0.004 | 0.016 |
| FBgn0051550 | 4566.869  | 3509.575  | 5624.163  | 1.603 | 0.680 | 0.004 | 0.018 |
| FBgn0037515 | 1014.505  | 779.619   | 1249.391  | 1.603 | 0.680 | 0.005 | 0.020 |
| FBgn0021800 | 1803.115  | 1385.584  | 2220.645  | 1.603 | 0.680 | 0.007 | 0.025 |
| FBgn0030486 | 2599.508  | 1997.412  | 3201.605  | 1.603 | 0.681 | 0.004 | 0.018 |
| FBgn0015622 | 8038.581  | 6176.356  | 9900.807  | 1.603 | 0.681 | 0.004 | 0.016 |
| FBgn0000241 | 1280.699  | 983.673   | 1577.726  | 1.604 | 0.682 | 0.005 | 0.019 |
| FBgn0030671 | 821.857   | 631.244   | 1012.469  | 1.604 | 0.682 | 0.006 | 0.022 |
| FBgn0261609 | 2198.369  | 1688.499  | 2708.239  | 1.604 | 0.682 | 0.005 | 0.019 |
| FBgn0051538 | 283.786   | 217.941   | 349.632   | 1.604 | 0.682 | 0.014 | 0.046 |
| FBgn0027592 | 633.081   | 486.078   | 780.085   | 1.605 | 0.682 | 0.008 | 0.030 |
| FBgn0030065 | 1375.786  | 1056.306  | 1695.266  | 1.605 | 0.682 | 0.005 | 0.020 |
| FBgn0001128 | 16479.703 | 12652.229 | 20307.177 | 1.605 | 0.683 | 0.005 | 0.018 |
| FBgn0031474 | 1936.747  | 1486.507  | 2386.987  | 1.606 | 0.683 | 0.005 | 0.020 |
| FBgn0261549 | 21196.736 | 16265.383 | 26128.089 | 1.606 | 0.684 | 0.004 | 0.015 |
| FBgn0031395 | 1231.875  | 945.189   | 1518.561  | 1.607 | 0.684 | 0.005 | 0.021 |
| FBgn0052043 | 3684.731  | 2826.753  | 4542.709  | 1.607 | 0.684 | 0.005 | 0.019 |
| FBgn0040089 | 419.851   | 322.000   | 517.701   | 1.608 | 0.685 | 0.011 | 0.037 |
| FBgn0010583 | 2157.083  | 1654.110  | 2660.057  | 1.608 | 0.685 | 0.005 | 0.020 |
| FBgn0261388 | 1465.127  | 1123.237  | 1807.017  | 1.609 | 0.686 | 0.005 | 0.019 |
| FBgn0013726 | 1840.595  | 1410.922  | 2270.268  | 1.609 | 0.686 | 0.005 | 0.021 |
| FBgn0035484 | 2419.743  | 1854.747  | 2984.740  | 1.609 | 0.686 | 0.005 | 0.019 |
| FBgn0036685 | 1406.792  | 1078.299  | 1735.286  | 1.609 | 0.686 | 0.006 | 0.022 |
| FBgn0259171 | 3272.050  | 2507.861  | 4036.238  | 1.609 | 0.687 | 0.005 | 0.020 |
| FBgn0032048 | 1473.597  | 1129.418  | 1817.775  | 1.609 | 0.687 | 0.006 | 0.023 |
| FBgn0038675 | 913.270   | 699.891   | 1126.649  | 1.610 | 0.687 | 0.006 | 0.022 |
| FBgn0037001 | 4823.226  | 3696.161  | 5950.292  | 1.610 | 0.687 | 0.003 | 0.014 |
| FBgn0035529 | 567.018   | 434.501   | 699.534   | 1.610 | 0.687 | 0.007 | 0.025 |
| FBgn0030347 | 1654.352  | 1267.697  | 2041.008  | 1.610 | 0.687 | 0.003 | 0.014 |

|             |           |           |           |       |       |       |       |
|-------------|-----------|-----------|-----------|-------|-------|-------|-------|
| FBgn0033108 | 3990.477  | 3056.683  | 4924.270  | 1.611 | 0.688 | 0.004 | 0.017 |
| FBgn0036298 | 639.502   | 489.767   | 789.237   | 1.611 | 0.688 | 0.005 | 0.021 |
| FBgn0004108 | 918.478   | 703.338   | 1133.619  | 1.612 | 0.689 | 0.005 | 0.021 |
| FBgn0038745 | 3984.409  | 3050.371  | 4918.446  | 1.612 | 0.689 | 0.004 | 0.017 |
| FBgn0025702 | 3016.366  | 2309.008  | 3723.724  | 1.613 | 0.689 | 0.004 | 0.017 |
| FBgn0052982 | 1359.044  | 1040.029  | 1678.060  | 1.613 | 0.690 | 0.004 | 0.017 |
| FBgn0033382 | 1736.576  | 1328.914  | 2144.238  | 1.614 | 0.690 | 0.004 | 0.016 |
| FBgn0023524 | 1606.546  | 1229.332  | 1983.760  | 1.614 | 0.690 | 0.004 | 0.018 |
| FBgn0033049 | 727.213   | 556.444   | 897.982   | 1.614 | 0.690 | 0.007 | 0.027 |
| FBgn0039688 | 3391.469  | 2594.100  | 4188.838  | 1.615 | 0.691 | 0.004 | 0.015 |
| FBgn0038583 | 317.973   | 243.124   | 392.821   | 1.616 | 0.692 | 0.014 | 0.046 |
| FBgn0015522 | 1078.894  | 824.722   | 1333.065  | 1.616 | 0.693 | 0.007 | 0.025 |
| FBgn0030323 | 418.642   | 319.975   | 517.309   | 1.617 | 0.693 | 0.008 | 0.030 |
| FBgn0031264 | 315.470   | 241.040   | 389.900   | 1.618 | 0.694 | 0.011 | 0.037 |
| FBgn0010280 | 5235.103  | 3999.690  | 6470.517  | 1.618 | 0.694 | 0.004 | 0.017 |
| FBgn0036621 | 1403.440  | 1072.224  | 1734.657  | 1.618 | 0.694 | 0.006 | 0.023 |
| FBgn0046225 | 403.896   | 308.515   | 499.277   | 1.618 | 0.695 | 0.011 | 0.037 |
| FBgn0030055 | 943.963   | 720.824   | 1167.101  | 1.619 | 0.695 | 0.005 | 0.018 |
| FBgn0031150 | 1178.418  | 899.857   | 1456.979  | 1.619 | 0.695 | 0.006 | 0.023 |
| FBgn0050389 | 3082.680  | 2353.650  | 3811.710  | 1.619 | 0.696 | 0.005 | 0.018 |
| FBgn0261859 | 4183.483  | 3193.814  | 5173.152  | 1.620 | 0.696 | 0.003 | 0.015 |
| FBgn0027080 | 2143.796  | 1636.564  | 2651.029  | 1.620 | 0.696 | 0.004 | 0.017 |
| FBgn0030293 | 2015.683  | 1538.487  | 2492.879  | 1.620 | 0.696 | 0.005 | 0.018 |
| FBgn0023516 | 1211.173  | 924.219   | 1498.126  | 1.621 | 0.697 | 0.005 | 0.019 |
| FBgn0010114 | 16054.384 | 12247.548 | 19861.219 | 1.622 | 0.697 | 0.004 | 0.015 |
| FBgn0023097 | 2277.536  | 1737.277  | 2817.795  | 1.622 | 0.698 | 0.004 | 0.017 |
| FBgn0035574 | 1462.653  | 1115.535  | 1809.772  | 1.622 | 0.698 | 0.004 | 0.018 |
| FBgn0030808 | 1241.899  | 947.151   | 1536.648  | 1.622 | 0.698 | 0.005 | 0.018 |
| FBgn0261552 | 12020.952 | 9164.902  | 14877.001 | 1.623 | 0.699 | 0.004 | 0.018 |
| FBgn0032474 | 1700.660  | 1296.348  | 2104.972  | 1.624 | 0.699 | 0.004 | 0.015 |
| FBgn0019643 | 2872.795  | 2189.098  | 3556.491  | 1.625 | 0.700 | 0.003 | 0.013 |
| FBgn0024365 | 1043.492  | 794.906   | 1292.079  | 1.625 | 0.701 | 0.004 | 0.016 |
| FBgn0020647 | 3102.481  | 2363.166  | 3841.795  | 1.626 | 0.701 | 0.003 | 0.013 |
| FBgn0031740 | 785.096   | 597.827   | 972.364   | 1.626 | 0.702 | 0.005 | 0.021 |

|             |           |           |           |       |       |       |       |
|-------------|-----------|-----------|-----------|-------|-------|-------|-------|
| FBgn0035995 | 2135.417  | 1626.015  | 2644.818  | 1.627 | 0.702 | 0.005 | 0.019 |
| FBgn0032336 | 973.251   | 740.997   | 1205.505  | 1.627 | 0.702 | 0.007 | 0.026 |
| FBgn0028837 | 634.156   | 482.698   | 785.614   | 1.628 | 0.703 | 0.006 | 0.023 |
| FBgn0024509 | 2430.100  | 1849.503  | 3010.697  | 1.628 | 0.703 | 0.009 | 0.031 |
| FBgn0028474 | 1207.642  | 918.744   | 1496.540  | 1.629 | 0.704 | 0.004 | 0.018 |
| FBgn0264491 | 2383.505  | 1813.199  | 2953.812  | 1.629 | 0.704 | 0.004 | 0.017 |
| FBgn0029979 | 5028.235  | 3825.022  | 6231.448  | 1.629 | 0.704 | 0.005 | 0.019 |
| FBgn0003463 | 2606.494  | 1982.626  | 3230.361  | 1.629 | 0.704 | 0.005 | 0.019 |
| FBgn0030552 | 561.785   | 427.295   | 696.275   | 1.629 | 0.704 | 0.006 | 0.022 |
| FBgn0000244 | 2537.268  | 1929.752  | 3144.784  | 1.630 | 0.705 | 0.003 | 0.013 |
| FBgn0261648 | 482.833   | 367.171   | 598.495   | 1.630 | 0.705 | 0.009 | 0.031 |
| FBgn0004363 | 17984.800 | 13672.416 | 22297.183 | 1.631 | 0.706 | 0.003 | 0.013 |
| FBgn0033844 | 2815.699  | 2140.516  | 3490.882  | 1.631 | 0.706 | 0.003 | 0.013 |
| FBgn0032587 | 715.259   | 543.726   | 886.793   | 1.631 | 0.706 | 0.006 | 0.023 |
| FBgn0264386 | 13376.563 | 10168.582 | 16584.543 | 1.631 | 0.706 | 0.003 | 0.012 |
| FBgn0031287 | 341.676   | 259.673   | 423.679   | 1.632 | 0.706 | 0.010 | 0.034 |
| FBgn0003310 | 1444.567  | 1097.766  | 1791.367  | 1.632 | 0.706 | 0.005 | 0.019 |
| FBgn0010808 | 2584.205  | 1963.697  | 3204.713  | 1.632 | 0.707 | 0.003 | 0.014 |
| FBgn0024732 | 714.903   | 543.115   | 886.692   | 1.633 | 0.707 | 0.006 | 0.022 |
| FBgn0052170 | 426.787   | 324.062   | 529.512   | 1.634 | 0.708 | 0.007 | 0.025 |
| FBgn0000490 | 701.847   | 532.909   | 870.785   | 1.634 | 0.708 | 0.007 | 0.025 |
| FBgn0039636 | 1286.039  | 976.459   | 1595.619  | 1.634 | 0.708 | 0.004 | 0.018 |
| FBgn0036111 | 3157.954  | 2397.630  | 3918.277  | 1.634 | 0.709 | 0.004 | 0.017 |
| FBgn0015222 | 16901.390 | 12829.748 | 20973.032 | 1.635 | 0.709 | 0.009 | 0.034 |
| FBgn0033224 | 1844.101  | 1399.797  | 2288.404  | 1.635 | 0.709 | 0.004 | 0.015 |
| FBgn0023509 | 1073.198  | 814.487   | 1331.909  | 1.635 | 0.710 | 0.004 | 0.016 |
| FBgn0023512 | 722.537   | 548.185   | 896.890   | 1.636 | 0.710 | 0.005 | 0.020 |
| FBgn0029736 | 944.624   | 716.667   | 1172.581  | 1.636 | 0.710 | 0.004 | 0.018 |
| FBgn0010399 | 1737.717  | 1318.219  | 2157.214  | 1.636 | 0.711 | 0.004 | 0.015 |
| FBgn0031298 | 1724.711  | 1308.319  | 2141.104  | 1.637 | 0.711 | 0.003 | 0.014 |
| FBgn0037134 | 526.952   | 399.621   | 654.282   | 1.637 | 0.711 | 0.005 | 0.021 |
| FBgn0051140 | 7959.739  | 6036.097  | 9883.381  | 1.637 | 0.711 | 0.003 | 0.014 |
| FBgn0031461 | 4548.285  | 3449.005  | 5647.566  | 1.637 | 0.711 | 0.003 | 0.015 |
| FBgn0001149 | 15029.708 | 11396.921 | 18662.494 | 1.638 | 0.711 | 0.008 | 0.029 |

|             |           |           |           |       |       |       |       |
|-------------|-----------|-----------|-----------|-------|-------|-------|-------|
| FBgn0042112 | 352.374   | 267.173   | 437.575   | 1.638 | 0.712 | 0.008 | 0.031 |
| FBgn0034408 | 2003.745  | 1518.621  | 2488.868  | 1.639 | 0.713 | 0.004 | 0.015 |
| FBgn0028704 | 17630.719 | 13360.086 | 21901.352 | 1.639 | 0.713 | 0.004 | 0.015 |
| FBgn0085450 | 1956.149  | 1482.092  | 2430.206  | 1.640 | 0.713 | 0.004 | 0.015 |
| FBgn0085453 | 662.577   | 501.983   | 823.171   | 1.640 | 0.714 | 0.005 | 0.021 |
| FBgn0037044 | 769.335   | 582.664   | 956.006   | 1.641 | 0.714 | 0.004 | 0.015 |
| FBgn0020235 | 11707.166 | 8864.841  | 14549.491 | 1.641 | 0.715 | 0.003 | 0.013 |
| FBgn0032135 | 1067.067  | 807.799   | 1326.336  | 1.642 | 0.715 | 0.004 | 0.016 |
| FBgn0035424 | 6431.558  | 4868.211  | 7994.904  | 1.642 | 0.716 | 0.003 | 0.014 |
| FBgn0034021 | 1003.327  | 759.441   | 1247.213  | 1.642 | 0.716 | 0.004 | 0.015 |
| FBgn0036451 | 5428.379  | 4108.574  | 6748.184  | 1.642 | 0.716 | 0.003 | 0.014 |
| FBgn0262582 | 8620.014  | 6523.557  | 10716.471 | 1.643 | 0.716 | 0.003 | 0.012 |
| FBgn0033876 | 2587.157  | 1957.108  | 3217.205  | 1.644 | 0.717 | 0.003 | 0.012 |
| FBgn0034118 | 756.243   | 572.055   | 940.431   | 1.644 | 0.717 | 0.005 | 0.021 |
| FBgn0038769 | 347.340   | 262.729   | 431.950   | 1.644 | 0.717 | 0.010 | 0.034 |
| FBgn0262717 | 588.946   | 445.407   | 732.486   | 1.645 | 0.718 | 0.005 | 0.019 |
| FBgn0038739 | 1421.010  | 1074.462  | 1767.559  | 1.645 | 0.718 | 0.006 | 0.022 |
| FBgn0004198 | 6473.757  | 4894.759  | 8052.756  | 1.645 | 0.718 | 0.004 | 0.015 |
| FBgn0038038 | 4216.636  | 3187.710  | 5245.561  | 1.646 | 0.719 | 0.003 | 0.013 |
| FBgn0024191 | 252.286   | 190.717   | 313.854   | 1.646 | 0.719 | 0.012 | 0.041 |
| FBgn0026318 | 719.645   | 543.935   | 895.355   | 1.646 | 0.719 | 0.005 | 0.019 |
| FBgn0261283 | 8064.161  | 6093.671  | 10034.651 | 1.647 | 0.720 | 0.002 | 0.011 |
| FBgn0030304 | 4923.398  | 3720.018  | 6126.778  | 1.647 | 0.720 | 0.002 | 0.010 |
| FBgn0036360 | 557.049   | 420.848   | 693.250   | 1.647 | 0.720 | 0.006 | 0.021 |
| FBgn0033465 | 2765.830  | 2088.172  | 3443.487  | 1.649 | 0.722 | 0.003 | 0.012 |
| FBgn0026179 | 5881.388  | 4438.533  | 7324.244  | 1.650 | 0.723 | 0.003 | 0.012 |
| FBgn0000633 | 1443.123  | 1088.940  | 1797.306  | 1.651 | 0.723 | 0.004 | 0.015 |
| FBgn0261985 | 3735.301  | 2818.535  | 4652.067  | 1.651 | 0.723 | 0.003 | 0.012 |
| FBgn0026441 | 1439.698  | 1086.257  | 1793.138  | 1.651 | 0.723 | 0.003 | 0.014 |
| FBgn0030096 | 614.464   | 463.589   | 765.339   | 1.651 | 0.723 | 0.004 | 0.017 |
| FBgn0038787 | 2049.293  | 1546.079  | 2552.508  | 1.651 | 0.723 | 0.003 | 0.014 |
| FBgn0004364 | 1914.145  | 1443.937  | 2384.352  | 1.651 | 0.724 | 0.003 | 0.014 |
| FBgn0035348 | 7412.183  | 5591.197  | 9233.169  | 1.651 | 0.724 | 0.002 | 0.009 |
| FBgn0038046 | 751.917   | 566.632   | 937.202   | 1.654 | 0.726 | 0.015 | 0.048 |

|             |            |           |            |       |       |       |       |
|-------------|------------|-----------|------------|-------|-------|-------|-------|
| FBgn0259935 | 483.796    | 364.577   | 603.014    | 1.654 | 0.726 | 0.005 | 0.020 |
| FBgn0035140 | 415.447    | 313.059   | 517.834    | 1.654 | 0.726 | 0.006 | 0.023 |
| FBgn0035807 | 1249.829   | 941.728   | 1557.930   | 1.654 | 0.726 | 0.003 | 0.012 |
| FBgn0038641 | 1786.139   | 1345.760  | 2226.518   | 1.654 | 0.726 | 0.002 | 0.010 |
| FBgn0086370 | 1650.152   | 1243.185  | 2057.120   | 1.655 | 0.727 | 0.003 | 0.013 |
| FBgn0031437 | 939.817    | 708.035   | 1171.599   | 1.655 | 0.727 | 0.014 | 0.046 |
| FBgn0010909 | 4040.764   | 3043.656  | 5037.871   | 1.655 | 0.727 | 0.003 | 0.011 |
| FBgn0030270 | 242.579    | 182.707   | 302.450    | 1.655 | 0.727 | 0.011 | 0.039 |
| FBgn0040475 | 1123.024   | 845.601   | 1400.447   | 1.656 | 0.728 | 0.004 | 0.015 |
| FBgn0032934 | 415.367    | 312.732   | 518.001    | 1.656 | 0.728 | 0.007 | 0.025 |
| FBgn0040075 | 423.219    | 318.535   | 527.902    | 1.657 | 0.729 | 0.006 | 0.023 |
| FBgn0003520 | 5622.830   | 4231.658  | 7014.002   | 1.658 | 0.729 | 0.003 | 0.012 |
| FBgn0261954 | 5793.911   | 4360.260  | 7227.562   | 1.658 | 0.729 | 0.003 | 0.011 |
| FBgn0051481 | 207.975    | 156.481   | 259.468    | 1.658 | 0.730 | 0.012 | 0.040 |
| FBgn0027571 | 123484.891 | 92885.924 | 154083.858 | 1.659 | 0.730 | 0.003 | 0.012 |
| FBgn0037163 | 3583.335   | 2695.127  | 4471.544   | 1.659 | 0.730 | 0.002 | 0.010 |
| FBgn0033972 | 1043.877   | 785.027   | 1302.726   | 1.659 | 0.731 | 0.003 | 0.013 |
| FBgn0259735 | 4448.792   | 3345.370  | 5552.214   | 1.660 | 0.731 | 0.003 | 0.011 |
| FBgn0011224 | 4474.303   | 3364.186  | 5584.419   | 1.660 | 0.731 | 0.009 | 0.031 |
| FBgn0029838 | 295.106    | 221.834   | 368.378    | 1.661 | 0.732 | 0.009 | 0.031 |
| FBgn0085408 | 2095.386   | 1575.071  | 2615.701   | 1.661 | 0.732 | 0.002 | 0.009 |
| FBgn0037758 | 4003.079   | 3008.627  | 4997.532   | 1.661 | 0.732 | 0.003 | 0.012 |
| FBgn0000611 | 2410.884   | 1811.841  | 3009.927   | 1.661 | 0.732 | 0.003 | 0.012 |
| FBgn0026160 | 8005.063   | 6015.246  | 9994.880   | 1.662 | 0.733 | 0.003 | 0.012 |
| FBgn0011674 | 293.571    | 220.584   | 366.559    | 1.662 | 0.733 | 0.007 | 0.027 |
| FBgn0026323 | 2477.822   | 1861.644  | 3094.000   | 1.662 | 0.733 | 0.002 | 0.011 |
| FBgn0085426 | 561.868    | 422.072   | 701.663    | 1.662 | 0.733 | 0.005 | 0.018 |
| FBgn0031048 | 1221.266   | 917.390   | 1525.143   | 1.662 | 0.733 | 0.002 | 0.010 |
| FBgn0031051 | 1497.300   | 1124.602  | 1869.999   | 1.663 | 0.734 | 0.003 | 0.012 |
| FBgn0030511 | 689.971    | 518.196   | 861.746    | 1.663 | 0.734 | 0.004 | 0.017 |
| FBgn0262871 | 2084.096   | 1565.065  | 2603.127   | 1.663 | 0.734 | 0.003 | 0.012 |
| FBgn0026879 | 5334.995   | 4006.171  | 6663.818   | 1.663 | 0.734 | 0.010 | 0.034 |
| FBgn0034269 | 908.668    | 682.062   | 1135.274   | 1.664 | 0.735 | 0.004 | 0.015 |
| FBgn0010379 | 2316.576   | 1738.790  | 2894.363   | 1.665 | 0.735 | 0.014 | 0.047 |



|             |           |           |           |       |       |       |       |
|-------------|-----------|-----------|-----------|-------|-------|-------|-------|
| FBgn0030499 | 493.585   | 370.462   | 616.708   | 1.665 | 0.735 | 0.005 | 0.021 |
| FBgn0038771 | 2125.600  | 1595.330  | 2655.871  | 1.665 | 0.735 | 0.003 | 0.012 |
| FBgn0085409 | 1715.465  | 1287.351  | 2143.578  | 1.665 | 0.736 | 0.003 | 0.012 |
| FBgn0024983 | 746.688   | 560.342   | 933.034   | 1.665 | 0.736 | 0.004 | 0.016 |
| FBgn0000115 | 2113.831  | 1586.253  | 2641.410  | 1.665 | 0.736 | 0.009 | 0.031 |
| FBgn0004449 | 9934.961  | 7453.591  | 12416.332 | 1.666 | 0.736 | 0.002 | 0.010 |
| FBgn0013770 | 18640.143 | 13981.764 | 23298.522 | 1.666 | 0.737 | 0.002 | 0.009 |
| FBgn0085431 | 169.809   | 127.363   | 212.255   | 1.667 | 0.737 | 0.013 | 0.042 |
| FBgn0050035 | 11120.540 | 8339.871  | 13901.210 | 1.667 | 0.737 | 0.002 | 0.009 |
| FBgn0000662 | 2974.976  | 2230.459  | 3719.493  | 1.668 | 0.738 | 0.002 | 0.011 |
| FBgn0035142 | 10408.951 | 7800.188  | 13017.713 | 1.669 | 0.739 | 0.009 | 0.033 |
| FBgn0035477 | 1338.679  | 1003.150  | 1674.208  | 1.669 | 0.739 | 0.003 | 0.012 |
| FBgn0085383 | 869.159   | 651.280   | 1087.038  | 1.669 | 0.739 | 0.003 | 0.013 |
| FBgn0036848 | 452.420   | 338.965   | 565.875   | 1.669 | 0.739 | 0.005 | 0.018 |
| FBgn0263218 | 10971.930 | 8219.356  | 13724.504 | 1.670 | 0.740 | 0.002 | 0.010 |
| FBgn0259228 | 3104.602  | 2325.531  | 3883.674  | 1.670 | 0.740 | 0.002 | 0.010 |
| FBgn0035811 | 9202.024  | 6891.250  | 11512.798 | 1.671 | 0.740 | 0.008 | 0.028 |
| FBgn0021875 | 674.166   | 504.834   | 843.499   | 1.671 | 0.741 | 0.004 | 0.016 |
| FBgn0024183 | 5444.304  | 4076.696  | 6811.912  | 1.671 | 0.741 | 0.002 | 0.011 |
| FBgn0025381 | 2798.938  | 2095.643  | 3502.234  | 1.671 | 0.741 | 0.002 | 0.009 |
| FBgn0034229 | 4010.036  | 3002.079  | 5017.994  | 1.672 | 0.741 | 0.002 | 0.008 |
| FBgn0031879 | 1446.075  | 1082.569  | 1809.582  | 1.672 | 0.741 | 0.002 | 0.010 |
| FBgn0032701 | 584.752   | 437.735   | 731.770   | 1.672 | 0.741 | 0.013 | 0.043 |
| FBgn0260945 | 2673.391  | 2001.096  | 3345.686  | 1.672 | 0.742 | 0.002 | 0.010 |
| FBgn0035878 | 952.909   | 713.250   | 1192.568  | 1.672 | 0.742 | 0.003 | 0.013 |
| FBgn0262617 | 3155.162  | 2361.463  | 3948.862  | 1.672 | 0.742 | 0.002 | 0.010 |
| FBgn0051038 | 4292.653  | 3212.239  | 5373.067  | 1.673 | 0.742 | 0.007 | 0.025 |
| FBgn0051163 | 1322.843  | 989.561   | 1656.125  | 1.674 | 0.743 | 0.003 | 0.012 |
| FBgn0019940 | 14180.123 | 10606.250 | 17753.996 | 1.674 | 0.743 | 0.002 | 0.008 |
| FBgn0031635 | 1078.924  | 806.987   | 1350.861  | 1.674 | 0.743 | 0.003 | 0.012 |
| FBgn0032646 | 1041.086  | 778.632   | 1303.540  | 1.674 | 0.743 | 0.003 | 0.013 |
| FBgn0026015 | 1053.483  | 787.793   | 1319.173  | 1.675 | 0.744 | 0.002 | 0.011 |
| FBgn0000543 | 866.914   | 648.262   | 1085.566  | 1.675 | 0.744 | 0.003 | 0.012 |
| FBgn0001150 | 275.830   | 206.257   | 345.403   | 1.675 | 0.744 | 0.010 | 0.034 |

|             |           |          |           |       |       |       |       |
|-------------|-----------|----------|-----------|-------|-------|-------|-------|
| FBgn0003464 | 6625.398  | 4953.916 | 8296.879  | 1.675 | 0.744 | 0.001 | 0.007 |
| FBgn0023506 | 595.466   | 445.087  | 745.845   | 1.676 | 0.745 | 0.004 | 0.016 |
| FBgn0031420 | 822.530   | 614.722  | 1030.338  | 1.676 | 0.745 | 0.003 | 0.014 |
| FBgn0038874 | 188.500   | 140.841  | 236.158   | 1.677 | 0.746 | 0.012 | 0.040 |
| FBgn0027066 | 1133.065  | 846.587  | 1419.543  | 1.677 | 0.746 | 0.003 | 0.013 |
| FBgn0010762 | 2839.104  | 2121.174 | 3557.034  | 1.677 | 0.746 | 0.003 | 0.011 |
| FBgn0031865 | 444.062   | 331.756  | 556.369   | 1.677 | 0.746 | 0.005 | 0.020 |
| FBgn0034570 | 4838.395  | 3612.293 | 6064.496  | 1.679 | 0.747 | 0.002 | 0.009 |
| FBgn0032798 | 2976.207  | 2221.376 | 3731.038  | 1.680 | 0.748 | 0.002 | 0.007 |
| FBgn0039562 | 5324.603  | 3973.828 | 6675.379  | 1.680 | 0.748 | 0.002 | 0.007 |
| FBgn0030510 | 595.763   | 444.588  | 746.938   | 1.680 | 0.749 | 0.003 | 0.011 |
| FBgn0031896 | 1161.006  | 866.362  | 1455.649  | 1.680 | 0.749 | 0.003 | 0.013 |
| FBgn0027079 | 1898.999  | 1417.064 | 2380.935  | 1.680 | 0.749 | 0.002 | 0.008 |
| FBgn0030674 | 10048.693 | 7496.852 | 12600.534 | 1.681 | 0.749 | 0.002 | 0.008 |
| FBgn0036096 | 545.169   | 406.637  | 683.700   | 1.681 | 0.750 | 0.004 | 0.016 |
| FBgn0083919 | 5264.665  | 3926.332 | 6602.999  | 1.682 | 0.750 | 0.002 | 0.007 |
| FBgn0010105 | 777.745   | 580.031  | 975.459   | 1.682 | 0.750 | 0.003 | 0.013 |
| FBgn0030465 | 427.853   | 318.989  | 536.716   | 1.683 | 0.751 | 0.004 | 0.016 |
| FBgn0035171 | 1279.738  | 953.813  | 1605.662  | 1.683 | 0.751 | 0.002 | 0.010 |
| FBgn0034606 | 2447.603  | 1823.563 | 3071.643  | 1.684 | 0.752 | 0.002 | 0.009 |
| FBgn0039809 | 410.609   | 305.917  | 515.302   | 1.684 | 0.752 | 0.006 | 0.022 |
| FBgn0034853 | 225.452   | 167.968  | 282.936   | 1.684 | 0.752 | 0.010 | 0.035 |
| FBgn0003557 | 2940.469  | 2189.479 | 3691.459  | 1.686 | 0.754 | 0.002 | 0.009 |
| FBgn0032731 | 1924.329  | 1432.302 | 2416.355  | 1.687 | 0.754 | 0.002 | 0.009 |
| FBgn0031116 | 1529.681  | 1138.534 | 1920.828  | 1.687 | 0.755 | 0.002 | 0.010 |
| FBgn0028703 | 8241.171  | 6133.027 | 10349.314 | 1.687 | 0.755 | 0.002 | 0.008 |
| FBgn0031950 | 1867.416  | 1389.364 | 2345.469  | 1.688 | 0.755 | 0.002 | 0.010 |
| FBgn0015524 | 146.163   | 108.730  | 183.595   | 1.689 | 0.756 | 0.014 | 0.046 |
| FBgn0053080 | 2028.504  | 1508.981 | 2548.026  | 1.689 | 0.756 | 0.002 | 0.010 |
| FBgn0028550 | 1512.776  | 1125.257 | 1900.295  | 1.689 | 0.756 | 0.003 | 0.012 |
| FBgn0051314 | 2469.034  | 1836.471 | 3101.598  | 1.689 | 0.756 | 0.003 | 0.013 |
| FBgn0035473 | 2284.682  | 1699.331 | 2870.032  | 1.689 | 0.756 | 0.002 | 0.008 |
| FBgn0039094 | 234.899   | 174.652  | 295.145   | 1.690 | 0.757 | 0.008 | 0.028 |
| FBgn0029914 | 735.122   | 546.558  | 923.686   | 1.690 | 0.757 | 0.003 | 0.014 |

|             |           |           |           |       |       |       |       |
|-------------|-----------|-----------|-----------|-------|-------|-------|-------|
| FBgn0036691 | 520.509   | 386.973   | 654.046   | 1.690 | 0.757 | 0.004 | 0.016 |
| FBgn0035872 | 2456.317  | 1826.065  | 3086.570  | 1.690 | 0.757 | 0.002 | 0.008 |
| FBgn0262475 | 797.948   | 593.185   | 1002.711  | 1.690 | 0.757 | 0.013 | 0.044 |
| FBgn0052425 | 4554.505  | 3385.020  | 5723.989  | 1.691 | 0.758 | 0.001 | 0.007 |
| FBgn0001123 | 1648.359  | 1224.843  | 2071.876  | 1.692 | 0.758 | 0.002 | 0.009 |
| FBgn0003715 | 549.073   | 407.988   | 690.158   | 1.692 | 0.758 | 0.003 | 0.013 |
| FBgn0037849 | 376.166   | 279.486   | 472.847   | 1.692 | 0.759 | 0.006 | 0.022 |
| FBgn0034908 | 307.979   | 228.787   | 387.172   | 1.692 | 0.759 | 0.006 | 0.021 |
| FBgn0010328 | 3206.385  | 2381.549  | 4031.221  | 1.693 | 0.759 | 0.002 | 0.008 |
| FBgn0040068 | 2716.694  | 2017.686  | 3415.701  | 1.693 | 0.759 | 0.002 | 0.008 |
| FBgn0014184 | 43681.789 | 32441.250 | 54922.329 | 1.693 | 0.760 | 0.002 | 0.008 |
| FBgn0052772 | 1111.869  | 825.739   | 1397.998  | 1.693 | 0.760 | 0.002 | 0.010 |
| FBgn0029785 | 45935.219 | 34106.415 | 57764.022 | 1.694 | 0.760 | 0.013 | 0.044 |
| FBgn0264502 | 4180.561  | 3103.810  | 5257.312  | 1.694 | 0.760 | 0.002 | 0.008 |
| FBgn0033602 | 598.349   | 444.238   | 752.461   | 1.694 | 0.760 | 0.003 | 0.013 |
| FBgn0036044 | 210.633   | 156.351   | 264.916   | 1.694 | 0.761 | 0.009 | 0.033 |
| FBgn0011297 | 621.679   | 461.442   | 781.916   | 1.695 | 0.761 | 0.003 | 0.012 |
| FBgn0261090 | 618.191   | 458.791   | 777.590   | 1.695 | 0.761 | 0.003 | 0.014 |
| FBgn0003513 | 169.664   | 125.912   | 213.417   | 1.695 | 0.761 | 0.013 | 0.042 |
| FBgn0038834 | 46446.695 | 34464.821 | 58428.570 | 1.695 | 0.762 | 0.001 | 0.005 |
| FBgn0034940 | 274.334   | 203.559   | 345.109   | 1.695 | 0.762 | 0.006 | 0.022 |
| FBgn0027841 | 228.455   | 169.483   | 287.427   | 1.696 | 0.762 | 0.008 | 0.030 |
| FBgn0001978 | 1530.112  | 1134.816  | 1925.408  | 1.697 | 0.763 | 0.002 | 0.009 |
| FBgn0034743 | 24410.165 | 18101.907 | 30718.423 | 1.697 | 0.763 | 0.001 | 0.005 |
| FBgn0015778 | 6604.147  | 4897.183  | 8311.111  | 1.697 | 0.763 | 0.002 | 0.009 |
| FBgn0034598 | 2538.702  | 1882.373  | 3195.032  | 1.697 | 0.763 | 0.001 | 0.007 |
| FBgn0036960 | 642.033   | 476.014   | 808.053   | 1.698 | 0.763 | 0.002 | 0.011 |
| FBgn0261439 | 6651.225  | 4930.876  | 8371.575  | 1.698 | 0.764 | 0.001 | 0.007 |
| FBgn0011837 | 2664.412  | 1974.871  | 3353.952  | 1.698 | 0.764 | 0.009 | 0.033 |
| FBgn0005616 | 1145.497  | 848.935   | 1442.060  | 1.699 | 0.764 | 0.002 | 0.010 |
| FBgn0028717 | 2324.928  | 1722.567  | 2927.290  | 1.699 | 0.765 | 0.001 | 0.007 |
| FBgn0028325 | 5090.649  | 3771.206  | 6410.092  | 1.700 | 0.765 | 0.001 | 0.007 |
| FBgn0033184 | 626.197   | 463.887   | 788.507   | 1.700 | 0.765 | 0.002 | 0.010 |
| FBgn0005585 | 11717.408 | 8679.958  | 14754.859 | 1.700 | 0.765 | 0.001 | 0.007 |

|             |           |          |           |       |       |       |       |
|-------------|-----------|----------|-----------|-------|-------|-------|-------|
| FBgn0026753 | 5545.521  | 4107.703 | 6983.338  | 1.700 | 0.766 | 0.001 | 0.005 |
| FBgn0033886 | 2407.458  | 1783.194 | 3031.723  | 1.700 | 0.766 | 0.001 | 0.007 |
| FBgn0052179 | 395.166   | 292.684  | 497.648   | 1.700 | 0.766 | 0.004 | 0.018 |
| FBgn0031637 | 5354.101  | 3965.001 | 6743.202  | 1.701 | 0.766 | 0.002 | 0.007 |
| FBgn0024992 | 1016.473  | 752.630  | 1280.315  | 1.701 | 0.766 | 0.002 | 0.007 |
| FBgn0038950 | 1314.918  | 973.567  | 1656.270  | 1.701 | 0.767 | 0.002 | 0.009 |
| FBgn0030206 | 622.840   | 461.136  | 784.544   | 1.701 | 0.767 | 0.003 | 0.013 |
| FBgn0034889 | 824.762   | 610.516  | 1039.007  | 1.702 | 0.767 | 0.002 | 0.010 |
| FBgn0039681 | 1073.891  | 794.712  | 1353.069  | 1.703 | 0.768 | 0.006 | 0.024 |
| FBgn0051547 | 2543.395  | 1882.082 | 3204.707  | 1.703 | 0.768 | 0.001 | 0.007 |
| FBgn0019960 | 4765.910  | 3526.717 | 6005.104  | 1.703 | 0.768 | 0.001 | 0.006 |
| FBgn0263994 | 3720.297  | 2752.914 | 4687.680  | 1.703 | 0.768 | 0.002 | 0.007 |
| FBgn0046704 | 2518.727  | 1863.713 | 3173.741  | 1.703 | 0.768 | 0.002 | 0.008 |
| FBgn0030228 | 1345.997  | 995.941  | 1696.053  | 1.703 | 0.768 | 0.013 | 0.042 |
| FBgn0052137 | 843.991   | 624.462  | 1063.520  | 1.703 | 0.768 | 0.003 | 0.012 |
| FBgn0033654 | 243.969   | 180.489  | 307.449   | 1.703 | 0.768 | 0.005 | 0.019 |
| FBgn0013954 | 11215.737 | 8292.644 | 14138.831 | 1.705 | 0.770 | 0.013 | 0.044 |
| FBgn0026602 | 1014.984  | 750.423  | 1279.546  | 1.705 | 0.770 | 0.003 | 0.011 |
| FBgn0015773 | 158.602   | 117.254  | 199.951   | 1.705 | 0.770 | 0.014 | 0.045 |
| FBgn0033581 | 749.512   | 554.014  | 945.009   | 1.706 | 0.770 | 0.002 | 0.009 |
| FBgn0262103 | 2501.630  | 1848.356 | 3154.904  | 1.707 | 0.771 | 0.001 | 0.007 |
| FBgn0035136 | 817.358   | 603.875  | 1030.840  | 1.707 | 0.771 | 0.002 | 0.011 |
| FBgn0030268 | 2091.780  | 1545.432 | 2638.128  | 1.707 | 0.772 | 0.002 | 0.007 |
| FBgn0053139 | 437.853   | 323.459  | 552.248   | 1.707 | 0.772 | 0.003 | 0.012 |
| FBgn0259210 | 3523.714  | 2602.869 | 4444.559  | 1.708 | 0.772 | 0.001 | 0.005 |
| FBgn0040375 | 970.455   | 716.097  | 1224.812  | 1.710 | 0.774 | 0.002 | 0.008 |
| FBgn0261551 | 10208.345 | 7532.262 | 12884.428 | 1.711 | 0.774 | 0.001 | 0.005 |
| FBgn0022724 | 283.501   | 209.127  | 357.874   | 1.711 | 0.775 | 0.006 | 0.022 |
| FBgn0053556 | 3738.172  | 2757.091 | 4719.254  | 1.712 | 0.775 | 0.001 | 0.006 |
| FBgn0023215 | 5193.063  | 3829.829 | 6556.297  | 1.712 | 0.776 | 0.011 | 0.038 |
| FBgn0033092 | 547.638   | 403.700  | 691.577   | 1.713 | 0.777 | 0.003 | 0.014 |
| FBgn0028646 | 5339.177  | 3935.840 | 6742.515  | 1.713 | 0.777 | 0.001 | 0.006 |
| FBgn0015359 | 834.579   | 615.109  | 1054.049  | 1.714 | 0.777 | 0.002 | 0.010 |
| FBgn0030993 | 211.668   | 155.997  | 267.338   | 1.714 | 0.777 | 0.005 | 0.021 |

|             |           |           |           |       |       |       |       |
|-------------|-----------|-----------|-----------|-------|-------|-------|-------|
| FBgn0042630 | 640.376   | 471.874   | 808.877   | 1.714 | 0.778 | 0.009 | 0.033 |
| FBgn0262872 | 5173.383  | 3811.487  | 6535.280  | 1.715 | 0.778 | 0.001 | 0.006 |
| FBgn0259242 | 841.555   | 620.014   | 1063.096  | 1.715 | 0.778 | 0.002 | 0.011 |
| FBgn0052066 | 612.423   | 451.005   | 773.841   | 1.716 | 0.779 | 0.002 | 0.010 |
| FBgn0028932 | 307.484   | 226.435   | 388.533   | 1.716 | 0.779 | 0.005 | 0.020 |
| FBgn0038515 | 1252.541  | 922.134   | 1582.949  | 1.717 | 0.780 | 0.002 | 0.009 |
| FBgn0051721 | 417.450   | 307.327   | 527.574   | 1.717 | 0.780 | 0.003 | 0.015 |
| FBgn0035656 | 345.438   | 254.269   | 436.608   | 1.717 | 0.780 | 0.005 | 0.021 |
| FBgn0038876 | 848.058   | 624.106   | 1072.011  | 1.718 | 0.780 | 0.001 | 0.007 |
| FBgn0261548 | 554.612   | 408.103   | 701.120   | 1.718 | 0.781 | 0.003 | 0.014 |
| FBgn0027601 | 4552.149  | 3348.666  | 5755.632  | 1.719 | 0.781 | 0.002 | 0.011 |
| FBgn0011259 | 3149.813  | 2317.065  | 3982.561  | 1.719 | 0.781 | 0.002 | 0.008 |
| FBgn0041775 | 5992.973  | 4407.973  | 7577.973  | 1.719 | 0.782 | 0.001 | 0.006 |
| FBgn0003884 | 12667.584 | 9317.294  | 16017.874 | 1.719 | 0.782 | 0.001 | 0.005 |
| FBgn0034750 | 650.685   | 478.493   | 822.877   | 1.720 | 0.782 | 0.002 | 0.009 |
| FBgn0030658 | 907.630   | 667.357   | 1147.904  | 1.720 | 0.782 | 0.003 | 0.014 |
| FBgn0030554 | 486.783   | 357.915   | 615.652   | 1.720 | 0.783 | 0.003 | 0.012 |
| FBgn0030011 | 2416.483  | 1776.721  | 3056.244  | 1.720 | 0.783 | 0.001 | 0.005 |
| FBgn0010768 | 458.569   | 337.097   | 580.042   | 1.721 | 0.783 | 0.003 | 0.012 |
| FBgn0002552 | 663.812   | 487.921   | 839.703   | 1.721 | 0.783 | 0.002 | 0.009 |
| FBgn0025558 | 1453.210  | 1068.130  | 1838.289  | 1.721 | 0.783 | 0.009 | 0.031 |
| FBgn0051064 | 1849.370  | 1359.297  | 2339.442  | 1.721 | 0.783 | 0.001 | 0.006 |
| FBgn0024360 | 473.382   | 347.935   | 598.829   | 1.721 | 0.783 | 0.003 | 0.013 |
| FBgn0031765 | 190.708   | 140.167   | 241.249   | 1.721 | 0.783 | 0.006 | 0.024 |
| FBgn0037185 | 183.677   | 134.986   | 232.369   | 1.721 | 0.784 | 0.009 | 0.031 |
| FBgn0036837 | 6878.261  | 5054.888  | 8701.634  | 1.721 | 0.784 | 0.001 | 0.005 |
| FBgn0001233 | 18994.325 | 13952.242 | 24036.407 | 1.723 | 0.785 | 0.001 | 0.005 |
| FBgn0003978 | 358.687   | 263.444   | 453.930   | 1.723 | 0.785 | 0.003 | 0.014 |
| FBgn0005670 | 628.224   | 461.226   | 795.221   | 1.724 | 0.786 | 0.010 | 0.035 |
| FBgn0031376 | 2911.577  | 2137.542  | 3685.612  | 1.724 | 0.786 | 0.006 | 0.024 |
| FBgn0042134 | 3312.943  | 2431.186  | 4194.699  | 1.725 | 0.787 | 0.001 | 0.006 |
| FBgn0000045 | 1513.363  | 1110.057  | 1916.669  | 1.727 | 0.788 | 0.001 | 0.005 |
| FBgn0025639 | 5458.114  | 4003.445  | 6912.782  | 1.727 | 0.788 | 0.001 | 0.006 |
| FBgn0041723 | 1976.525  | 1449.506  | 2503.543  | 1.727 | 0.788 | 0.001 | 0.007 |

|             |           |           |           |       |       |       |       |
|-------------|-----------|-----------|-----------|-------|-------|-------|-------|
| FBgn0036155 | 298.482   | 218.838   | 378.127   | 1.728 | 0.789 | 0.004 | 0.017 |
| FBgn0030269 | 771.837   | 565.861   | 977.812   | 1.728 | 0.789 | 0.002 | 0.011 |
| FBgn0050115 | 1653.368  | 1212.139  | 2094.596  | 1.728 | 0.789 | 0.001 | 0.006 |
| FBgn0000459 | 1259.561  | 923.374   | 1595.747  | 1.728 | 0.789 | 0.007 | 0.026 |
| FBgn0033162 | 1914.414  | 1403.401  | 2425.427  | 1.728 | 0.789 | 0.002 | 0.009 |
| FBgn0259715 | 8779.013  | 6435.271  | 11122.754 | 1.728 | 0.789 | 0.001 | 0.005 |
| FBgn0035060 | 5741.654  | 4208.513  | 7274.795  | 1.729 | 0.790 | 0.001 | 0.005 |
| FBgn0039828 | 872.494   | 639.366   | 1105.623  | 1.729 | 0.790 | 0.002 | 0.009 |
| FBgn0031534 | 1157.787  | 848.154   | 1467.420  | 1.730 | 0.791 | 0.001 | 0.007 |
| FBgn0017482 | 327.394   | 239.790   | 414.997   | 1.731 | 0.791 | 0.004 | 0.017 |
| FBgn0003963 | 707.026   | 517.835   | 896.217   | 1.731 | 0.791 | 0.002 | 0.009 |
| FBgn0000037 | 2172.883  | 1591.228  | 2754.538  | 1.731 | 0.792 | 0.001 | 0.006 |
| FBgn0085447 | 30904.764 | 22631.347 | 39178.180 | 1.731 | 0.792 | 0.001 | 0.005 |
| FBgn0025629 | 702.295   | 514.244   | 890.346   | 1.731 | 0.792 | 0.002 | 0.008 |
| FBgn0039808 | 2731.096  | 1999.680  | 3462.512  | 1.732 | 0.792 | 0.001 | 0.006 |
| FBgn0004656 | 9749.740  | 7137.478  | 12362.002 | 1.732 | 0.792 | 0.001 | 0.005 |
| FBgn0085410 | 559.562   | 409.525   | 709.600   | 1.733 | 0.793 | 0.002 | 0.011 |
| FBgn0035388 | 2150.953  | 1574.200  | 2727.707  | 1.733 | 0.793 | 0.001 | 0.006 |
| FBgn0030343 | 1543.022  | 1128.857  | 1957.188  | 1.734 | 0.794 | 0.001 | 0.006 |
| FBgn0261108 | 611.448   | 447.222   | 775.673   | 1.734 | 0.794 | 0.002 | 0.011 |
| FBgn0026878 | 175.015   | 128.003   | 222.026   | 1.735 | 0.795 | 0.009 | 0.032 |
| FBgn0031808 | 658.416   | 481.556   | 835.276   | 1.735 | 0.795 | 0.001 | 0.007 |
| FBgn0052666 | 3755.328  | 2746.151  | 4764.504  | 1.735 | 0.795 | 0.001 | 0.005 |
| FBgn0034918 | 341.312   | 249.575   | 433.049   | 1.735 | 0.795 | 0.003 | 0.014 |
| FBgn0028509 | 2865.306  | 2094.961  | 3635.652  | 1.735 | 0.795 | 0.001 | 0.005 |
| FBgn0005672 | 2937.940  | 2148.030  | 3727.850  | 1.735 | 0.795 | 0.001 | 0.006 |
| FBgn0036641 | 402.641   | 294.330   | 510.953   | 1.736 | 0.796 | 0.003 | 0.013 |
| FBgn0000636 | 1946.029  | 1422.452  | 2469.606  | 1.736 | 0.796 | 0.007 | 0.026 |
| FBgn0031188 | 719.780   | 525.946   | 913.615   | 1.737 | 0.797 | 0.002 | 0.008 |
| FBgn0029715 | 1577.793  | 1152.529  | 2003.057  | 1.738 | 0.797 | 0.001 | 0.007 |
| FBgn0037908 | 510.613   | 372.982   | 648.243   | 1.738 | 0.797 | 0.002 | 0.008 |
| FBgn0085425 | 249.601   | 182.316   | 316.885   | 1.738 | 0.798 | 0.005 | 0.019 |
| FBgn0002781 | 9824.686  | 7176.116  | 12473.256 | 1.738 | 0.798 | 0.001 | 0.004 |
| FBgn0020278 | 1513.440  | 1105.214  | 1921.665  | 1.739 | 0.798 | 0.001 | 0.005 |

|             |           |           |           |       |       |       |       |
|-------------|-----------|-----------|-----------|-------|-------|-------|-------|
| FBgn0033777 | 1395.875  | 1019.208  | 1772.542  | 1.739 | 0.798 | 0.003 | 0.014 |
| FBgn0013674 | 7269.367  | 5307.201  | 9231.533  | 1.739 | 0.799 | 0.001 | 0.005 |
| FBgn0044011 | 209.547   | 152.979   | 266.116   | 1.740 | 0.799 | 0.004 | 0.018 |
| FBgn0036516 | 1569.920  | 1145.882  | 1993.958  | 1.740 | 0.799 | 0.001 | 0.006 |
| FBgn0035713 | 4828.925  | 3524.468  | 6133.382  | 1.740 | 0.799 | 0.001 | 0.004 |
| FBgn0039802 | 1403.944  | 1024.653  | 1783.234  | 1.740 | 0.799 | 0.001 | 0.005 |
| FBgn0014869 | 9230.006  | 6735.262  | 11724.751 | 1.741 | 0.800 | 0.001 | 0.005 |
| FBgn0262593 | 9584.245  | 6993.351  | 12175.140 | 1.741 | 0.800 | 0.001 | 0.005 |
| FBgn0022710 | 3245.258  | 2366.897  | 4123.619  | 1.742 | 0.801 | 0.001 | 0.005 |
| FBgn0027335 | 2811.787  | 2050.653  | 3572.921  | 1.742 | 0.801 | 0.001 | 0.004 |
| FBgn0036851 | 417.172   | 304.238   | 530.106   | 1.742 | 0.801 | 0.003 | 0.011 |
| FBgn0085430 | 5198.945  | 3791.308  | 6606.582  | 1.743 | 0.801 | 0.005 | 0.019 |
| FBgn0000044 | 14304.376 | 10429.470 | 18179.282 | 1.743 | 0.802 | 0.001 | 0.005 |
| FBgn0039283 | 408.699   | 297.937   | 519.461   | 1.744 | 0.802 | 0.002 | 0.010 |
| FBgn0000667 | 3445.472  | 2511.640  | 4379.303  | 1.744 | 0.802 | 0.001 | 0.004 |
| FBgn0001139 | 3054.876  | 2226.388  | 3883.363  | 1.744 | 0.803 | 0.001 | 0.005 |
| FBgn0026181 | 2004.163  | 1460.616  | 2547.710  | 1.744 | 0.803 | 0.001 | 0.005 |
| FBgn0031285 | 20968.174 | 15273.458 | 26662.891 | 1.746 | 0.804 | 0.001 | 0.004 |
| FBgn0013720 | 907.876   | 661.293   | 1154.460  | 1.746 | 0.804 | 0.001 | 0.006 |
| FBgn0038286 | 1806.523  | 1315.815  | 2297.231  | 1.746 | 0.804 | 0.001 | 0.005 |
| FBgn0040823 | 452.338   | 329.437   | 575.239   | 1.746 | 0.804 | 0.005 | 0.018 |
| FBgn0027868 | 479.481   | 349.201   | 609.760   | 1.746 | 0.804 | 0.002 | 0.009 |
| FBgn0032643 | 948.936   | 690.921   | 1206.951  | 1.747 | 0.805 | 0.007 | 0.025 |
| FBgn0003654 | 873.631   | 636.090   | 1111.172  | 1.747 | 0.805 | 0.001 | 0.007 |
| FBgn0031971 | 6570.656  | 4782.871  | 8358.442  | 1.748 | 0.805 | 0.001 | 0.004 |
| FBgn0026876 | 122.157   | 88.914    | 155.400   | 1.748 | 0.806 | 0.012 | 0.040 |
| FBgn0039858 | 19239.697 | 14003.216 | 24476.178 | 1.748 | 0.806 | 0.001 | 0.004 |
| FBgn0030528 | 375.264   | 273.099   | 477.430   | 1.748 | 0.806 | 0.009 | 0.031 |
| FBgn0039286 | 291.760   | 212.309   | 371.211   | 1.748 | 0.806 | 0.003 | 0.014 |
| FBgn0021874 | 463.316   | 337.142   | 589.491   | 1.748 | 0.806 | 0.002 | 0.008 |
| FBgn0259146 | 880.980   | 640.922   | 1121.038  | 1.749 | 0.807 | 0.004 | 0.015 |
| FBgn0037200 | 431.743   | 313.998   | 549.488   | 1.750 | 0.807 | 0.002 | 0.010 |
| FBgn0038603 | 3163.735  | 2300.604  | 4026.865  | 1.750 | 0.808 | 0.001 | 0.004 |
| FBgn0051122 | 1231.038  | 895.141   | 1566.934  | 1.750 | 0.808 | 0.001 | 0.006 |

|             |           |           |           |       |       |       |       |
|-------------|-----------|-----------|-----------|-------|-------|-------|-------|
| FBgn0034858 | 1002.605  | 729.002   | 1276.207  | 1.751 | 0.808 | 0.001 | 0.006 |
| FBgn0036761 | 766.886   | 557.520   | 976.252   | 1.751 | 0.808 | 0.001 | 0.006 |
| FBgn0261955 | 15299.349 | 11119.580 | 19479.117 | 1.752 | 0.809 | 0.002 | 0.008 |
| FBgn0010638 | 2975.925  | 2162.649  | 3789.200  | 1.752 | 0.809 | 0.008 | 0.028 |
| FBgn0029937 | 1174.879  | 853.760   | 1495.998  | 1.752 | 0.809 | 0.001 | 0.005 |
| FBgn0041582 | 1986.313  | 1443.193  | 2529.433  | 1.753 | 0.810 | 0.001 | 0.005 |
| FBgn0032407 | 1539.406  | 1118.101  | 1960.712  | 1.754 | 0.810 | 0.001 | 0.005 |
| FBgn0030286 | 4046.626  | 2938.932  | 5154.320  | 1.754 | 0.810 | 0.001 | 0.004 |
| FBgn0035903 | 1160.567  | 842.879   | 1478.255  | 1.754 | 0.810 | 0.001 | 0.006 |
| FBgn0003178 | 13650.531 | 9910.932  | 17390.131 | 1.755 | 0.811 | 0.001 | 0.003 |
| FBgn0040281 | 3159.017  | 2293.565  | 4024.469  | 1.755 | 0.811 | 0.001 | 0.004 |
| FBgn0000659 | 697.226   | 506.181   | 888.271   | 1.755 | 0.811 | 0.002 | 0.008 |
| FBgn0250788 | 19424.649 | 14101.075 | 24748.223 | 1.755 | 0.812 | 0.001 | 0.004 |
| FBgn0002622 | 54274.420 | 39395.076 | 69153.764 | 1.755 | 0.812 | 0.001 | 0.006 |
| FBgn0023169 | 5632.520  | 4087.907  | 7177.133  | 1.756 | 0.812 | 0.001 | 0.004 |
| FBgn0010238 | 1575.905  | 1143.567  | 2008.242  | 1.756 | 0.812 | 0.001 | 0.005 |
| FBgn0261922 | 8213.488  | 5957.805  | 10469.171 | 1.757 | 0.813 | 0.001 | 0.003 |
| FBgn0034887 | 873.006   | 633.214   | 1112.798  | 1.757 | 0.813 | 0.001 | 0.005 |
| FBgn0015129 | 846.668   | 614.085   | 1079.250  | 1.757 | 0.814 | 0.001 | 0.006 |
| FBgn0043796 | 654.029   | 474.342   | 833.715   | 1.758 | 0.814 | 0.001 | 0.007 |
| FBgn0028370 | 1426.916  | 1034.811  | 1819.021  | 1.758 | 0.814 | 0.001 | 0.005 |
| FBgn0039710 | 888.300   | 644.071   | 1132.529  | 1.758 | 0.814 | 0.001 | 0.006 |
| FBgn0038810 | 1114.725  | 808.060   | 1421.390  | 1.759 | 0.815 | 0.001 | 0.005 |
| FBgn0040529 | 8290.165  | 6008.608  | 10571.721 | 1.759 | 0.815 | 0.002 | 0.010 |
| FBgn0263289 | 14139.589 | 10247.605 | 18031.573 | 1.760 | 0.815 | 0.001 | 0.005 |
| FBgn0014133 | 8434.905  | 6111.118  | 10758.691 | 1.761 | 0.816 | 0.001 | 0.003 |
| FBgn0001145 | 36864.996 | 26684.775 | 47045.216 | 1.763 | 0.818 | 0.001 | 0.004 |
| FBgn0022023 | 5010.854  | 3626.585  | 6395.122  | 1.763 | 0.818 | 0.004 | 0.018 |
| FBgn0023477 | 5213.285  | 3772.967  | 6653.603  | 1.763 | 0.818 | 0.004 | 0.016 |
| FBgn0250789 | 17948.090 | 12987.705 | 22908.474 | 1.764 | 0.819 | 0.002 | 0.008 |
| FBgn0262719 | 406.576   | 294.203   | 518.950   | 1.764 | 0.819 | 0.015 | 0.050 |
| FBgn0010905 | 6508.128  | 4708.478  | 8307.778  | 1.764 | 0.819 | 0.001 | 0.004 |
| FBgn0035638 | 609.327   | 440.739   | 777.914   | 1.765 | 0.820 | 0.010 | 0.035 |
| FBgn0027790 | 4309.796  | 3116.664  | 5502.928  | 1.766 | 0.820 | 0.001 | 0.004 |



|             |           |           |           |       |       |       |       |
|-------------|-----------|-----------|-----------|-------|-------|-------|-------|
| FBgn0030089 | 3877.021  | 2803.290  | 4950.753  | 1.766 | 0.821 | 0.001 | 0.003 |
| FBgn0261573 | 2467.003  | 1783.744  | 3150.262  | 1.766 | 0.821 | 0.001 | 0.004 |
| FBgn0015519 | 516.958   | 373.752   | 660.163   | 1.766 | 0.821 | 0.001 | 0.007 |
| FBgn0034903 | 517.946   | 374.418   | 661.473   | 1.767 | 0.821 | 0.001 | 0.006 |
| FBgn0032378 | 1455.790  | 1052.107  | 1859.474  | 1.767 | 0.822 | 0.001 | 0.005 |
| FBgn0037342 | 1100.074  | 794.965   | 1405.183  | 1.768 | 0.822 | 0.006 | 0.023 |
| FBgn0030434 | 690.168   | 498.641   | 881.696   | 1.768 | 0.822 | 0.001 | 0.005 |
| FBgn0028983 | 1095.275  | 791.307   | 1399.244  | 1.768 | 0.822 | 0.012 | 0.041 |
| FBgn0038747 | 1366.538  | 987.182   | 1745.893  | 1.769 | 0.823 | 0.001 | 0.005 |
| FBgn0028926 | 543.676   | 392.672   | 694.680   | 1.769 | 0.823 | 0.001 | 0.007 |
| FBgn0010213 | 3439.181  | 2483.698  | 4394.664  | 1.769 | 0.823 | 0.001 | 0.004 |
| FBgn0026721 | 4875.865  | 3521.087  | 6230.643  | 1.770 | 0.823 | 0.001 | 0.003 |
| FBgn0053547 | 12610.808 | 9105.374  | 16116.243 | 1.770 | 0.824 | 0.001 | 0.004 |
| FBgn0036340 | 1652.956  | 1193.287  | 2112.625  | 1.770 | 0.824 | 0.001 | 0.004 |
| FBgn0029778 | 631.978   | 456.178   | 807.778   | 1.771 | 0.824 | 0.002 | 0.008 |
| FBgn0036039 | 1304.284  | 941.310   | 1667.257  | 1.771 | 0.825 | 0.001 | 0.005 |
| FBgn0033443 | 113.082   | 81.604    | 144.561   | 1.772 | 0.825 | 0.012 | 0.041 |
| FBgn0025635 | 367.673   | 265.018   | 470.327   | 1.775 | 0.828 | 0.002 | 0.009 |
| FBgn0264087 | 16273.024 | 11729.566 | 20816.482 | 1.775 | 0.828 | 0.003 | 0.011 |
| FBgn0086686 | 3715.610  | 2678.040  | 4753.179  | 1.775 | 0.828 | 0.004 | 0.016 |
| FBgn0030600 | 7577.453  | 5461.390  | 9693.515  | 1.775 | 0.828 | 0.001 | 0.003 |
| FBgn0086704 | 7502.818  | 5407.409  | 9598.226  | 1.775 | 0.828 | 0.000 | 0.002 |
| FBgn0000036 | 1314.843  | 947.456   | 1682.231  | 1.776 | 0.828 | 0.001 | 0.006 |
| FBgn0011769 | 358.345   | 258.166   | 458.525   | 1.776 | 0.829 | 0.002 | 0.009 |
| FBgn0086698 | 487.132   | 350.827   | 623.437   | 1.777 | 0.829 | 0.001 | 0.007 |
| FBgn0030878 | 1387.394  | 998.602   | 1776.186  | 1.779 | 0.831 | 0.001 | 0.004 |
| FBgn0032782 | 1002.999  | 721.852   | 1284.147  | 1.779 | 0.831 | 0.001 | 0.005 |
| FBgn0037475 | 284.558   | 204.783   | 364.332   | 1.779 | 0.831 | 0.002 | 0.010 |
| FBgn0051125 | 185.760   | 133.669   | 237.851   | 1.779 | 0.831 | 0.006 | 0.022 |
| FBgn0003301 | 8462.298  | 6088.802  | 10835.793 | 1.780 | 0.832 | 0.000 | 0.003 |
| FBgn0020443 | 1805.844  | 1299.185  | 2312.504  | 1.780 | 0.832 | 0.001 | 0.004 |
| FBgn0041588 | 588.340   | 423.253   | 753.427   | 1.780 | 0.832 | 0.001 | 0.005 |
| FBgn0024321 | 1199.925  | 863.191   | 1536.658  | 1.780 | 0.832 | 0.001 | 0.005 |
| FBgn0085451 | 3882.494  | 2792.465  | 4972.523  | 1.781 | 0.832 | 0.001 | 0.003 |

|             |           |           |           |       |       |       |       |
|-------------|-----------|-----------|-----------|-------|-------|-------|-------|
| FBgn0030177 | 790.543   | 568.434   | 1012.653  | 1.781 | 0.833 | 0.001 | 0.005 |
| FBgn0035234 | 129.317   | 92.964    | 165.670   | 1.782 | 0.834 | 0.010 | 0.035 |
| FBgn0264606 | 4778.693  | 3435.241  | 6122.145  | 1.782 | 0.834 | 0.001 | 0.003 |
| FBgn0033925 | 673.637   | 484.221   | 863.053   | 1.782 | 0.834 | 0.001 | 0.005 |
| FBgn0000179 | 1800.244  | 1294.013  | 2306.476  | 1.782 | 0.834 | 0.002 | 0.008 |
| FBgn0031745 | 159.152   | 114.358   | 203.946   | 1.783 | 0.835 | 0.006 | 0.022 |
| FBgn0019982 | 1811.572  | 1301.690  | 2321.454  | 1.783 | 0.835 | 0.001 | 0.003 |
| FBgn0038197 | 3085.072  | 2216.666  | 3953.479  | 1.784 | 0.835 | 0.001 | 0.003 |
| FBgn0039213 | 3558.696  | 2556.446  | 4560.946  | 1.784 | 0.835 | 0.001 | 0.003 |
| FBgn0003977 | 929.206   | 667.349   | 1191.062  | 1.785 | 0.836 | 0.001 | 0.004 |
| FBgn0025864 | 3845.374  | 2761.090  | 4929.657  | 1.785 | 0.836 | 0.000 | 0.003 |
| FBgn0034645 | 5046.179  | 3623.252  | 6469.107  | 1.785 | 0.836 | 0.000 | 0.003 |
| FBgn0036734 | 2070.105  | 1486.288  | 2653.922  | 1.786 | 0.836 | 0.001 | 0.004 |
| FBgn0035160 | 296.833   | 213.113   | 380.552   | 1.786 | 0.836 | 0.003 | 0.014 |
| FBgn0053926 | 1456.058  | 1045.299  | 1866.816  | 1.786 | 0.837 | 0.009 | 0.032 |
| FBgn0030026 | 573.134   | 411.368   | 734.899   | 1.786 | 0.837 | 0.001 | 0.006 |
| FBgn0004865 | 633.140   | 454.406   | 811.874   | 1.787 | 0.837 | 0.001 | 0.006 |
| FBgn0052392 | 244.874   | 175.721   | 314.027   | 1.787 | 0.838 | 0.004 | 0.015 |
| FBgn0034931 | 206.368   | 148.088   | 264.648   | 1.787 | 0.838 | 0.004 | 0.016 |
| FBgn0000064 | 32581.034 | 23373.385 | 41788.682 | 1.788 | 0.838 | 0.002 | 0.008 |
| FBgn0038491 | 329.125   | 236.001   | 422.248   | 1.789 | 0.839 | 0.002 | 0.009 |
| FBgn0035720 | 55556.452 | 39830.556 | 71282.348 | 1.790 | 0.840 | 0.000 | 0.003 |
| FBgn0026083 | 6016.041  | 4312.739  | 7719.343  | 1.790 | 0.840 | 0.000 | 0.003 |
| FBgn0004362 | 1863.020  | 1335.415  | 2390.625  | 1.790 | 0.840 | 0.001 | 0.004 |
| FBgn0015247 | 2752.234  | 1972.453  | 3532.016  | 1.791 | 0.841 | 0.000 | 0.002 |
| FBgn0039419 | 822.475   | 589.430   | 1055.520  | 1.791 | 0.841 | 0.001 | 0.005 |
| FBgn0030092 | 250.874   | 179.778   | 321.970   | 1.791 | 0.841 | 0.003 | 0.013 |
| FBgn0025335 | 899.939   | 644.894   | 1154.984  | 1.791 | 0.841 | 0.001 | 0.004 |
| FBgn0052638 | 1343.776  | 962.925   | 1724.626  | 1.791 | 0.841 | 0.001 | 0.003 |
| FBgn0037186 | 761.631   | 545.617   | 977.645   | 1.792 | 0.841 | 0.001 | 0.004 |
| FBgn0261113 | 14036.539 | 10055.490 | 18017.588 | 1.792 | 0.841 | 0.001 | 0.003 |
| FBgn0261873 | 11683.614 | 8368.208  | 14999.020 | 1.792 | 0.842 | 0.000 | 0.003 |
| FBgn0015320 | 1020.577  | 730.792   | 1310.361  | 1.793 | 0.842 | 0.001 | 0.004 |
| FBgn0029932 | 1006.932  | 720.783   | 1293.080  | 1.794 | 0.843 | 0.001 | 0.004 |

|             |           |           |           |       |       |       |       |
|-------------|-----------|-----------|-----------|-------|-------|-------|-------|
| FBgn0025790 | 2158.323  | 1544.963  | 2771.682  | 1.794 | 0.843 | 0.000 | 0.003 |
| FBgn0035199 | 151.404   | 108.377   | 194.431   | 1.794 | 0.843 | 0.004 | 0.016 |
| FBgn0038385 | 288.199   | 206.257   | 370.140   | 1.795 | 0.844 | 0.006 | 0.024 |
| FBgn0024189 | 2722.489  | 1947.450  | 3497.527  | 1.796 | 0.845 | 0.000 | 0.003 |
| FBgn0033339 | 3184.021  | 2276.682  | 4091.361  | 1.797 | 0.846 | 0.000 | 0.003 |
| FBgn0262139 | 601.369   | 429.900   | 772.837   | 1.798 | 0.846 | 0.001 | 0.005 |
| FBgn0024846 | 684.160   | 489.078   | 879.242   | 1.798 | 0.846 | 0.001 | 0.004 |
| FBgn0036374 | 2298.047  | 1642.504  | 2953.589  | 1.798 | 0.847 | 0.001 | 0.003 |
| FBgn0030613 | 8468.158  | 6050.458  | 10885.858 | 1.799 | 0.847 | 0.000 | 0.002 |
| FBgn0264339 | 1962.620  | 1402.265  | 2522.974  | 1.799 | 0.847 | 0.000 | 0.003 |
| FBgn0050460 | 1355.460  | 968.427   | 1742.494  | 1.799 | 0.847 | 0.001 | 0.003 |
| FBgn0030327 | 1238.623  | 884.519   | 1592.726  | 1.801 | 0.849 | 0.001 | 0.003 |
| FBgn0022768 | 2736.661  | 1953.684  | 3519.639  | 1.802 | 0.849 | 0.001 | 0.003 |
| FBgn0031457 | 786.189   | 561.064   | 1011.314  | 1.802 | 0.850 | 0.011 | 0.039 |
| FBgn0263093 | 402.871   | 287.377   | 518.365   | 1.804 | 0.851 | 0.002 | 0.008 |
| FBgn0030196 | 400.494   | 285.661   | 515.327   | 1.804 | 0.851 | 0.015 | 0.047 |
| FBgn0020378 | 229.317   | 163.527   | 295.107   | 1.805 | 0.852 | 0.003 | 0.014 |
| FBgn0011828 | 4189.787  | 2986.887  | 5392.687  | 1.805 | 0.852 | 0.000 | 0.002 |
| FBgn0017549 | 2663.994  | 1899.026  | 3428.962  | 1.806 | 0.853 | 0.000 | 0.002 |
| FBgn0036302 | 1224.035  | 872.336   | 1575.733  | 1.806 | 0.853 | 0.001 | 0.004 |
| FBgn0039215 | 1459.022  | 1039.701  | 1878.342  | 1.807 | 0.853 | 0.000 | 0.003 |
| FBgn0035260 | 360.587   | 256.844   | 464.330   | 1.808 | 0.854 | 0.002 | 0.008 |
| FBgn0029835 | 282.750   | 201.374   | 364.127   | 1.808 | 0.855 | 0.002 | 0.009 |
| FBgn0030810 | 3664.994  | 2610.016  | 4719.971  | 1.808 | 0.855 | 0.002 | 0.008 |
| FBgn0031713 | 1205.214  | 858.245   | 1552.182  | 1.809 | 0.855 | 0.000 | 0.002 |
| FBgn0024285 | 1484.905  | 1057.240  | 1912.570  | 1.809 | 0.855 | 0.000 | 0.003 |
| FBgn0039713 | 61599.336 | 43851.882 | 79346.790 | 1.809 | 0.856 | 0.008 | 0.029 |
| FBgn0033252 | 1326.168  | 943.882   | 1708.454  | 1.810 | 0.856 | 0.001 | 0.004 |
| FBgn0261261 | 4323.820  | 3077.063  | 5570.578  | 1.810 | 0.856 | 0.000 | 0.002 |
| FBgn0025571 | 3433.174  | 2443.194  | 4423.155  | 1.810 | 0.856 | 0.000 | 0.002 |
| FBgn0030941 | 832.656   | 592.482   | 1072.830  | 1.811 | 0.857 | 0.001 | 0.004 |
| FBgn0029580 | 247.548   | 176.082   | 319.014   | 1.812 | 0.857 | 0.002 | 0.009 |
| FBgn0039709 | 1431.088  | 1017.849  | 1844.327  | 1.812 | 0.858 | 0.000 | 0.003 |
| FBgn0011666 | 3328.394  | 2366.454  | 4290.335  | 1.813 | 0.858 | 0.006 | 0.023 |

|             |           |           |           |       |       |       |       |
|-------------|-----------|-----------|-----------|-------|-------|-------|-------|
| FBgn0262032 | 335.640   | 238.628   | 432.651   | 1.813 | 0.858 | 0.002 | 0.008 |
| FBgn0262601 | 285.193   | 202.666   | 367.721   | 1.814 | 0.860 | 0.002 | 0.008 |
| FBgn0030052 | 1499.083  | 1065.202  | 1932.965  | 1.815 | 0.860 | 0.000 | 0.002 |
| FBgn0036518 | 1882.223  | 1337.328  | 2427.117  | 1.815 | 0.860 | 0.000 | 0.003 |
| FBgn0086712 | 1040.905  | 739.562   | 1342.249  | 1.815 | 0.860 | 0.000 | 0.003 |
| FBgn0051390 | 980.668   | 696.564   | 1264.772  | 1.816 | 0.861 | 0.001 | 0.003 |
| FBgn0033520 | 337.567   | 239.723   | 435.411   | 1.816 | 0.861 | 0.002 | 0.009 |
| FBgn0034914 | 1907.733  | 1354.663  | 2460.802  | 1.817 | 0.861 | 0.001 | 0.004 |
| FBgn0010473 | 10786.057 | 7658.292  | 13913.822 | 1.817 | 0.861 | 0.000 | 0.002 |
| FBgn0263108 | 5279.173  | 3747.895  | 6810.451  | 1.817 | 0.862 | 0.000 | 0.002 |
| FBgn0261649 | 2844.007  | 2018.620  | 3669.394  | 1.818 | 0.862 | 0.000 | 0.003 |
| FBgn0053993 | 710.477   | 504.168   | 916.786   | 1.818 | 0.863 | 0.003 | 0.013 |
| FBgn0040351 | 909.985   | 645.659   | 1174.311  | 1.819 | 0.863 | 0.001 | 0.004 |
| FBgn0038108 | 5250.849  | 3725.611  | 6776.087  | 1.819 | 0.863 | 0.000 | 0.002 |
| FBgn0031664 | 418.045   | 296.518   | 539.572   | 1.820 | 0.864 | 0.001 | 0.006 |
| FBgn0015400 | 1108.265  | 785.879   | 1430.650  | 1.820 | 0.864 | 0.000 | 0.003 |
| FBgn0086357 | 6336.864  | 4493.140  | 8180.589  | 1.821 | 0.864 | 0.000 | 0.002 |
| FBgn0016041 | 2681.900  | 1901.392  | 3462.408  | 1.821 | 0.865 | 0.000 | 0.003 |
| FBgn0029888 | 3005.379  | 2130.664  | 3880.093  | 1.821 | 0.865 | 0.005 | 0.020 |
| FBgn0032773 | 15279.892 | 10832.235 | 19727.549 | 1.821 | 0.865 | 0.000 | 0.002 |
| FBgn0035237 | 10211.562 | 7239.066  | 13184.057 | 1.821 | 0.865 | 0.000 | 0.002 |
| FBgn0023458 | 10751.468 | 7620.927  | 13882.008 | 1.822 | 0.865 | 0.000 | 0.002 |
| FBgn0035600 | 6462.511  | 4579.591  | 8345.431  | 1.822 | 0.866 | 0.001 | 0.007 |
| FBgn0259927 | 5470.242  | 3875.838  | 7064.646  | 1.823 | 0.866 | 0.000 | 0.002 |
| FBgn0035816 | 958.633   | 678.924   | 1238.342  | 1.824 | 0.867 | 0.001 | 0.004 |
| FBgn0030508 | 1976.241  | 1399.413  | 2553.070  | 1.824 | 0.867 | 0.000 | 0.003 |
| FBgn0029929 | 591.726   | 418.827   | 764.626   | 1.826 | 0.868 | 0.001 | 0.004 |
| FBgn0040918 | 1382.715  | 978.479   | 1786.952  | 1.826 | 0.869 | 0.001 | 0.004 |
| FBgn0002525 | 1717.660  | 1215.332  | 2219.987  | 1.827 | 0.869 | 0.000 | 0.003 |
| FBgn0051151 | 4359.182  | 3083.844  | 5634.521  | 1.827 | 0.870 | 0.000 | 0.002 |
| FBgn0037882 | 152.428   | 107.830   | 197.027   | 1.827 | 0.870 | 0.005 | 0.021 |
| FBgn0264308 | 2599.513  | 1838.771  | 3360.254  | 1.827 | 0.870 | 0.000 | 0.002 |
| FBgn0042712 | 1082.932  | 765.933   | 1399.931  | 1.828 | 0.870 | 0.000 | 0.003 |
| FBgn0027291 | 5202.962  | 3679.006  | 6726.917  | 1.828 | 0.871 | 0.003 | 0.012 |

|             |          |          |           |       |       |       |       |
|-------------|----------|----------|-----------|-------|-------|-------|-------|
| FBgn0004893 | 507.917  | 359.132  | 656.702   | 1.829 | 0.871 | 0.001 | 0.005 |
| FBgn0085449 | 919.954  | 650.283  | 1189.625  | 1.829 | 0.871 | 0.001 | 0.003 |
| FBgn0031529 | 401.261  | 283.469  | 519.054   | 1.831 | 0.873 | 0.012 | 0.041 |
| FBgn0039136 | 1563.236 | 1104.057 | 2022.415  | 1.832 | 0.873 | 0.000 | 0.002 |
| FBgn0086676 | 4437.127 | 3133.597 | 5740.657  | 1.832 | 0.873 | 0.000 | 0.002 |
| FBgn0030053 | 798.890  | 564.090  | 1033.689  | 1.832 | 0.874 | 0.001 | 0.006 |
| FBgn0038246 | 1903.068 | 1343.589 | 2462.548  | 1.833 | 0.874 | 0.000 | 0.002 |
| FBgn0038516 | 2002.108 | 1413.253 | 2590.963  | 1.833 | 0.874 | 0.000 | 0.003 |
| FBgn0041111 | 4474.694 | 3158.318 | 5791.071  | 1.834 | 0.875 | 0.000 | 0.002 |
| FBgn0030447 | 621.067  | 438.201  | 803.934   | 1.835 | 0.875 | 0.001 | 0.003 |
| FBgn0039561 | 2214.887 | 1562.237 | 2867.537  | 1.836 | 0.876 | 0.000 | 0.002 |
| FBgn0037546 | 714.803  | 504.160  | 925.445   | 1.836 | 0.876 | 0.013 | 0.042 |
| FBgn0038316 | 806.135  | 568.553  | 1043.718  | 1.836 | 0.876 | 0.000 | 0.003 |
| FBgn0034588 | 9690.919 | 6834.404 | 12547.434 | 1.836 | 0.877 | 0.000 | 0.001 |
| FBgn0029840 | 1960.030 | 1381.764 | 2538.297  | 1.837 | 0.877 | 0.000 | 0.002 |
| FBgn0004401 | 5860.471 | 4131.382 | 7589.560  | 1.837 | 0.877 | 0.000 | 0.001 |
| FBgn0039175 | 832.528  | 586.832  | 1078.223  | 1.837 | 0.878 | 0.000 | 0.003 |
| FBgn0262081 | 3454.551 | 2433.856 | 4475.246  | 1.839 | 0.879 | 0.000 | 0.002 |
| FBgn0052547 | 552.784  | 389.444  | 716.124   | 1.839 | 0.879 | 0.001 | 0.004 |
| FBgn0037391 | 2012.742 | 1417.574 | 2607.910  | 1.840 | 0.879 | 0.000 | 0.002 |
| FBgn0024232 | 2163.770 | 1523.925 | 2803.614  | 1.840 | 0.879 | 0.003 | 0.012 |
| FBgn0031011 | 1543.388 | 1086.961 | 1999.816  | 1.840 | 0.880 | 0.000 | 0.002 |
| FBgn0023518 | 2053.476 | 1444.972 | 2661.980  | 1.842 | 0.881 | 0.000 | 0.002 |
| FBgn0024973 | 1215.401 | 855.115  | 1575.687  | 1.843 | 0.882 | 0.000 | 0.002 |
| FBgn0085421 | 4485.570 | 3155.629 | 5815.511  | 1.843 | 0.882 | 0.000 | 0.002 |
| FBgn0259823 | 1845.664 | 1298.381 | 2392.948  | 1.843 | 0.882 | 0.000 | 0.002 |
| FBgn0030027 | 902.407  | 634.810  | 1170.003  | 1.843 | 0.882 | 0.000 | 0.002 |
| FBgn0037375 | 1565.343 | 1101.090 | 2029.597  | 1.843 | 0.882 | 0.000 | 0.002 |
| FBgn0023214 | 490.202  | 344.809  | 635.596   | 1.843 | 0.882 | 0.001 | 0.005 |
| FBgn0003071 | 5990.941 | 4213.788 | 7768.094  | 1.843 | 0.882 | 0.000 | 0.001 |
| FBgn0025631 | 1369.378 | 962.918  | 1775.839  | 1.844 | 0.883 | 0.000 | 0.002 |
| FBgn0037574 | 235.601  | 165.656  | 305.545   | 1.844 | 0.883 | 0.002 | 0.009 |
| FBgn0261723 | 172.897  | 121.538  | 224.256   | 1.845 | 0.884 | 0.004 | 0.015 |
| FBgn0037881 | 1747.540 | 1228.081 | 2266.999  | 1.846 | 0.884 | 0.000 | 0.002 |

|             |           |           |           |       |       |       |       |
|-------------|-----------|-----------|-----------|-------|-------|-------|-------|
| FBgn0002441 | 1915.012  | 1345.714  | 2484.309  | 1.846 | 0.884 | 0.000 | 0.002 |
| FBgn0000567 | 1533.637  | 1077.610  | 1989.663  | 1.846 | 0.885 | 0.000 | 0.002 |
| FBgn0010194 | 686.507   | 482.274   | 890.741   | 1.847 | 0.885 | 0.001 | 0.003 |
| FBgn0031282 | 300.045   | 210.765   | 389.326   | 1.847 | 0.885 | 0.002 | 0.008 |
| FBgn0031097 | 193.134   | 135.622   | 250.645   | 1.848 | 0.886 | 0.002 | 0.011 |
| FBgn0033249 | 909.598   | 638.707   | 1180.489  | 1.848 | 0.886 | 0.000 | 0.002 |
| FBgn0033368 | 1261.889  | 886.045   | 1637.733  | 1.848 | 0.886 | 0.005 | 0.019 |
| FBgn0052333 | 2383.072  | 1673.067  | 3093.077  | 1.849 | 0.887 | 0.000 | 0.002 |
| FBgn0261929 | 438.736   | 307.912   | 569.561   | 1.850 | 0.887 | 0.001 | 0.004 |
| FBgn0011722 | 5118.895  | 3591.570  | 6646.219  | 1.851 | 0.888 | 0.000 | 0.001 |
| FBgn0024814 | 3995.491  | 2802.861  | 5188.120  | 1.851 | 0.888 | 0.000 | 0.002 |
| FBgn0034583 | 4997.119  | 3504.726  | 6489.512  | 1.852 | 0.889 | 0.009 | 0.031 |
| FBgn0033226 | 2858.915  | 2005.006  | 3712.824  | 1.852 | 0.889 | 0.000 | 0.001 |
| FBgn0040337 | 534.952   | 375.003   | 694.902   | 1.853 | 0.890 | 0.001 | 0.007 |
| FBgn0025621 | 2048.801  | 1435.958  | 2661.644  | 1.854 | 0.890 | 0.000 | 0.001 |
| FBgn0005613 | 111.774   | 78.321    | 145.228   | 1.854 | 0.891 | 0.009 | 0.031 |
| FBgn0032772 | 225.963   | 158.316   | 293.610   | 1.855 | 0.891 | 0.002 | 0.008 |
| FBgn0011236 | 782.508   | 548.144   | 1016.872  | 1.855 | 0.892 | 0.000 | 0.003 |
| FBgn0034643 | 1455.860  | 1019.624  | 1892.096  | 1.856 | 0.892 | 0.000 | 0.002 |
| FBgn0259150 | 2648.061  | 1854.576  | 3441.545  | 1.856 | 0.892 | 0.000 | 0.002 |
| FBgn0031497 | 1739.510  | 1218.234  | 2260.786  | 1.856 | 0.892 | 0.000 | 0.001 |
| FBgn0015075 | 596.488   | 417.673   | 775.303   | 1.856 | 0.892 | 0.001 | 0.003 |
| FBgn0004507 | 16744.573 | 11723.566 | 21765.580 | 1.857 | 0.893 | 0.002 | 0.008 |
| FBgn0027550 | 2634.153  | 1844.255  | 3424.051  | 1.857 | 0.893 | 0.000 | 0.001 |
| FBgn0032886 | 1432.456  | 1002.789  | 1862.124  | 1.857 | 0.893 | 0.000 | 0.002 |
| FBgn0028418 | 367.598   | 257.261   | 477.935   | 1.858 | 0.894 | 0.001 | 0.006 |
| FBgn0004359 | 518.893   | 363.055   | 674.731   | 1.858 | 0.894 | 0.001 | 0.007 |
| FBgn0262527 | 6110.411  | 4274.445  | 7946.378  | 1.859 | 0.895 | 0.000 | 0.001 |
| FBgn0005596 | 622.175   | 434.936   | 809.414   | 1.861 | 0.896 | 0.001 | 0.004 |
| FBgn0261394 | 2057.360  | 1438.194  | 2676.526  | 1.861 | 0.896 | 0.000 | 0.001 |
| FBgn0052105 | 203.042   | 141.935   | 264.149   | 1.861 | 0.896 | 0.003 | 0.011 |
| FBgn0031321 | 288.515   | 201.597   | 375.433   | 1.862 | 0.897 | 0.001 | 0.007 |
| FBgn0010113 | 2014.201  | 1407.162  | 2621.240  | 1.863 | 0.897 | 0.001 | 0.007 |
| FBgn0031098 | 445.388   | 311.106   | 579.670   | 1.863 | 0.898 | 0.001 | 0.003 |

|             |           |           |           |       |       |       |       |
|-------------|-----------|-----------|-----------|-------|-------|-------|-------|
| FBgn0028978 | 491.019   | 342.952   | 639.086   | 1.863 | 0.898 | 0.001 | 0.004 |
| FBgn0028499 | 446.027   | 311.522   | 580.532   | 1.864 | 0.898 | 0.001 | 0.003 |
| FBgn0263995 | 11001.082 | 7683.247  | 14318.918 | 1.864 | 0.898 | 0.001 | 0.006 |
| FBgn0041105 | 99.221    | 69.276    | 129.166   | 1.865 | 0.899 | 0.012 | 0.039 |
| FBgn0033373 | 736.490   | 514.214   | 958.766   | 1.865 | 0.899 | 0.000 | 0.002 |
| FBgn0263993 | 5190.111  | 3623.300  | 6756.922  | 1.865 | 0.899 | 0.001 | 0.004 |
| FBgn0086708 | 4483.273  | 3129.261  | 5837.285  | 1.865 | 0.899 | 0.000 | 0.001 |
| FBgn0029105 | 1574.873  | 1099.099  | 2050.648  | 1.866 | 0.900 | 0.001 | 0.005 |
| FBgn0015371 | 8329.644  | 5812.129  | 10847.159 | 1.866 | 0.900 | 0.000 | 0.001 |
| FBgn0031257 | 915.366   | 638.271   | 1192.461  | 1.868 | 0.902 | 0.000 | 0.002 |
| FBgn0002590 | 26290.169 | 18327.034 | 34253.304 | 1.869 | 0.902 | 0.002 | 0.010 |
| FBgn0026079 | 745.308   | 519.387   | 971.228   | 1.870 | 0.903 | 0.000 | 0.002 |
| FBgn0038742 | 1425.160  | 993.161   | 1857.160  | 1.870 | 0.903 | 0.000 | 0.002 |
| FBgn0027602 | 531.656   | 370.495   | 692.817   | 1.870 | 0.903 | 0.001 | 0.003 |
| FBgn0039557 | 320.497   | 223.274   | 417.720   | 1.871 | 0.904 | 0.005 | 0.021 |
| FBgn0031314 | 260.832   | 181.706   | 339.958   | 1.871 | 0.904 | 0.001 | 0.007 |
| FBgn0033926 | 5797.006  | 4038.354  | 7555.658  | 1.871 | 0.904 | 0.000 | 0.001 |
| FBgn0031488 | 221.082   | 153.976   | 288.188   | 1.872 | 0.904 | 0.001 | 0.007 |
| FBgn0030502 | 2038.875  | 1419.463  | 2658.287  | 1.873 | 0.905 | 0.002 | 0.011 |
| FBgn0261556 | 3266.136  | 2273.172  | 4259.101  | 1.874 | 0.906 | 0.000 | 0.001 |
| FBgn0020618 | 62632.644 | 43590.515 | 81674.773 | 1.874 | 0.906 | 0.009 | 0.033 |
| FBgn0020626 | 2825.942  | 1966.127  | 3685.756  | 1.875 | 0.907 | 0.000 | 0.001 |
| FBgn0000557 | 18605.439 | 12941.939 | 24268.938 | 1.875 | 0.907 | 0.000 | 0.001 |
| FBgn0263354 | 7365.432  | 5123.306  | 9607.557  | 1.875 | 0.907 | 0.000 | 0.001 |
| FBgn0031791 | 311.387   | 216.590   | 406.183   | 1.875 | 0.907 | 0.001 | 0.005 |
| FBgn0263144 | 2233.781  | 1553.408  | 2914.154  | 1.876 | 0.908 | 0.000 | 0.001 |
| FBgn0041585 | 1547.694  | 1076.092  | 2019.295  | 1.877 | 0.908 | 0.000 | 0.001 |
| FBgn0035404 | 3915.698  | 2721.562  | 5109.834  | 1.878 | 0.909 | 0.000 | 0.001 |
| FBgn0085422 | 626.774   | 435.621   | 817.928   | 1.878 | 0.909 | 0.000 | 0.002 |
| FBgn0028572 | 3927.565  | 2729.545  | 5125.585  | 1.878 | 0.909 | 0.000 | 0.001 |
| FBgn0000181 | 17222.076 | 11968.486 | 22475.665 | 1.878 | 0.909 | 0.000 | 0.001 |
| FBgn0011656 | 3901.145  | 2711.070  | 5091.220  | 1.878 | 0.909 | 0.000 | 0.001 |
| FBgn0035010 | 782.093   | 543.384   | 1020.803  | 1.879 | 0.910 | 0.000 | 0.002 |
| FBgn0031309 | 142.186   | 98.785    | 185.588   | 1.879 | 0.910 | 0.005 | 0.019 |

|             |           |           |           |       |       |       |       |
|-------------|-----------|-----------|-----------|-------|-------|-------|-------|
| FBgn0036285 | 546.966   | 379.965   | 713.967   | 1.879 | 0.910 | 0.000 | 0.002 |
| FBgn0039757 | 34465.796 | 23934.242 | 44997.350 | 1.880 | 0.911 | 0.000 | 0.001 |
| FBgn0052813 | 970.182   | 673.692   | 1266.673  | 1.880 | 0.911 | 0.000 | 0.001 |
| FBgn0001219 | 63914.504 | 44381.013 | 83447.995 | 1.880 | 0.911 | 0.000 | 0.001 |
| FBgn0033431 | 295.011   | 204.846   | 385.176   | 1.880 | 0.911 | 0.001 | 0.005 |
| FBgn0010602 | 1733.902  | 1203.918  | 2263.886  | 1.880 | 0.911 | 0.004 | 0.015 |
| FBgn0036844 | 1380.309  | 958.142   | 1802.477  | 1.881 | 0.912 | 0.000 | 0.002 |
| FBgn0031066 | 11058.097 | 7675.428  | 14440.767 | 1.881 | 0.912 | 0.001 | 0.004 |
| FBgn0015737 | 6058.807  | 4204.291  | 7913.323  | 1.882 | 0.912 | 0.004 | 0.017 |
| FBgn0032748 | 1824.469  | 1265.391  | 2383.546  | 1.884 | 0.914 | 0.000 | 0.001 |
| FBgn0003326 | 401.297   | 278.276   | 524.318   | 1.884 | 0.914 | 0.001 | 0.003 |
| FBgn0034990 | 102.616   | 71.148    | 134.083   | 1.885 | 0.914 | 0.003 | 0.014 |
| FBgn0051352 | 1138.347  | 789.028   | 1487.666  | 1.885 | 0.915 | 0.000 | 0.002 |
| FBgn0259994 | 17444.153 | 12090.882 | 22797.424 | 1.886 | 0.915 | 0.000 | 0.001 |
| FBgn0051183 | 1463.643  | 1014.358  | 1912.928  | 1.886 | 0.915 | 0.000 | 0.001 |
| FBgn0024314 | 1007.427  | 698.168   | 1316.687  | 1.886 | 0.915 | 0.000 | 0.001 |
| FBgn0004903 | 1473.137  | 1020.770  | 1925.503  | 1.886 | 0.916 | 0.000 | 0.001 |
| FBgn0039013 | 334.690   | 231.910   | 437.471   | 1.886 | 0.916 | 0.001 | 0.004 |
| FBgn0029839 | 909.975   | 630.448   | 1189.502  | 1.887 | 0.916 | 0.000 | 0.001 |
| FBgn0023540 | 1152.883  | 798.620   | 1507.147  | 1.887 | 0.916 | 0.000 | 0.001 |
| FBgn0015277 | 1193.446  | 826.540   | 1560.352  | 1.888 | 0.917 | 0.000 | 0.001 |
| FBgn0051869 | 1373.085  | 950.947   | 1795.222  | 1.888 | 0.917 | 0.000 | 0.001 |
| FBgn0004910 | 976.432   | 676.192   | 1276.672  | 1.888 | 0.917 | 0.000 | 0.002 |
| FBgn0008636 | 284.814   | 197.224   | 372.405   | 1.888 | 0.917 | 0.001 | 0.005 |
| FBgn0040765 | 553.069   | 382.942   | 723.195   | 1.889 | 0.917 | 0.001 | 0.003 |
| FBgn0027580 | 15102.468 | 10454.505 | 19750.431 | 1.889 | 0.918 | 0.000 | 0.001 |
| FBgn0031313 | 6137.998  | 4248.927  | 8027.069  | 1.889 | 0.918 | 0.000 | 0.001 |
| FBgn0016794 | 1209.019  | 836.899   | 1581.138  | 1.889 | 0.918 | 0.000 | 0.001 |
| FBgn0085443 | 3033.428  | 2099.115  | 3967.741  | 1.890 | 0.919 | 0.000 | 0.001 |
| FBgn0030218 | 741.550   | 513.052   | 970.048   | 1.891 | 0.919 | 0.000 | 0.002 |
| FBgn0263231 | 4055.784  | 2805.777  | 5305.791  | 1.891 | 0.919 | 0.000 | 0.001 |
| FBgn0035983 | 1214.196  | 839.637   | 1588.755  | 1.892 | 0.920 | 0.008 | 0.028 |
| FBgn0052815 | 2307.848  | 1595.765  | 3019.930  | 1.892 | 0.920 | 0.000 | 0.001 |
| FBgn0013811 | 108.178   | 74.785    | 141.570   | 1.893 | 0.921 | 0.006 | 0.024 |



|             |           |           |           |       |       |       |       |
|-------------|-----------|-----------|-----------|-------|-------|-------|-------|
| FBgn0032753 | 910.397   | 629.291   | 1191.504  | 1.893 | 0.921 | 0.000 | 0.001 |
| FBgn0030058 | 141.109   | 97.527    | 184.691   | 1.894 | 0.921 | 0.003 | 0.014 |
| FBgn0044871 | 353.368   | 244.222   | 462.514   | 1.894 | 0.921 | 0.001 | 0.004 |
| FBgn0025678 | 1429.618  | 987.841   | 1871.394  | 1.894 | 0.922 | 0.000 | 0.001 |
| FBgn0035318 | 929.768   | 642.370   | 1217.166  | 1.895 | 0.922 | 0.000 | 0.001 |
| FBgn0000579 | 21020.281 | 14521.031 | 27519.532 | 1.895 | 0.922 | 0.002 | 0.010 |
| FBgn0030240 | 1189.019  | 821.318   | 1556.721  | 1.895 | 0.922 | 0.000 | 0.001 |
| FBgn0261931 | 1580.035  | 1090.973  | 2069.098  | 1.897 | 0.923 | 0.000 | 0.001 |
| FBgn0028490 | 26713.018 | 18438.422 | 34987.614 | 1.898 | 0.924 | 0.000 | 0.001 |
| FBgn0020439 | 7864.248  | 5424.303  | 10304.193 | 1.900 | 0.926 | 0.004 | 0.017 |
| FBgn0031357 | 432.653   | 298.260   | 567.046   | 1.901 | 0.927 | 0.000 | 0.003 |
| FBgn0052677 | 5474.421  | 3773.656  | 7175.185  | 1.901 | 0.927 | 0.000 | 0.001 |
| FBgn0030645 | 683.356   | 471.052   | 895.661   | 1.901 | 0.927 | 0.001 | 0.003 |
| FBgn0033183 | 1407.839  | 970.437   | 1845.240  | 1.901 | 0.927 | 0.000 | 0.001 |
| FBgn0036032 | 4757.341  | 3278.523  | 6236.158  | 1.902 | 0.928 | 0.000 | 0.001 |
| FBgn0031306 | 9769.879  | 6732.587  | 12807.171 | 1.902 | 0.928 | 0.000 | 0.001 |
| FBgn0033988 | 2084.109  | 1436.151  | 2732.068  | 1.902 | 0.928 | 0.000 | 0.001 |
| FBgn0034308 | 2210.625  | 1523.233  | 2898.017  | 1.903 | 0.928 | 0.000 | 0.001 |
| FBgn0053988 | 5372.397  | 3701.407  | 7043.386  | 1.903 | 0.928 | 0.000 | 0.001 |
| FBgn0015221 | 18655.297 | 12852.758 | 24457.835 | 1.903 | 0.928 | 0.002 | 0.007 |
| FBgn0040071 | 2311.942  | 1592.703  | 3031.182  | 1.903 | 0.928 | 0.000 | 0.002 |
| FBgn0040237 | 1626.608  | 1120.420  | 2132.797  | 1.904 | 0.929 | 0.003 | 0.015 |
| FBgn0033342 | 3326.001  | 2290.819  | 4361.184  | 1.904 | 0.929 | 0.000 | 0.001 |
| FBgn0031739 | 420.258   | 289.439   | 551.076   | 1.904 | 0.929 | 0.001 | 0.003 |
| FBgn0264542 | 4442.070  | 3058.186  | 5825.955  | 1.905 | 0.930 | 0.000 | 0.001 |
| FBgn0027621 | 10814.139 | 7444.453  | 14183.824 | 1.905 | 0.930 | 0.000 | 0.001 |
| FBgn0033153 | 479.242   | 329.909   | 628.576   | 1.905 | 0.930 | 0.000 | 0.003 |
| FBgn0263602 | 274.693   | 189.080   | 360.306   | 1.906 | 0.930 | 0.001 | 0.004 |
| FBgn0025800 | 3205.210  | 2205.843  | 4204.576  | 1.906 | 0.931 | 0.000 | 0.001 |
| FBgn0026319 | 345.434   | 237.702   | 453.166   | 1.906 | 0.931 | 0.001 | 0.003 |
| FBgn0052121 | 103.201   | 71.014    | 135.387   | 1.906 | 0.931 | 0.007 | 0.026 |
| FBgn0037312 | 1501.971  | 1033.363  | 1970.579  | 1.907 | 0.931 | 0.000 | 0.002 |
| FBgn0264652 | 1535.547  | 1056.384  | 2014.709  | 1.907 | 0.931 | 0.000 | 0.001 |
| FBgn0031050 | 776.799   | 534.354   | 1019.243  | 1.907 | 0.932 | 0.000 | 0.001 |

|             |           |          |           |       |       |       |       |
|-------------|-----------|----------|-----------|-------|-------|-------|-------|
| FBgn0000114 | 1946.261  | 1338.590 | 2553.931  | 1.908 | 0.932 | 0.000 | 0.001 |
| FBgn0025638 | 1966.034  | 1352.083 | 2579.984  | 1.908 | 0.932 | 0.000 | 0.001 |
| FBgn0024944 | 1360.556  | 935.479  | 1785.634  | 1.909 | 0.933 | 0.000 | 0.001 |
| FBgn0005633 | 193.219   | 132.831  | 253.607   | 1.909 | 0.933 | 0.010 | 0.035 |
| FBgn0029123 | 3491.984  | 2400.233 | 4583.736  | 1.910 | 0.933 | 0.003 | 0.011 |
| FBgn0034718 | 3166.582  | 2176.448 | 4156.715  | 1.910 | 0.933 | 0.000 | 0.001 |
| FBgn0015558 | 5080.064  | 3490.897 | 6669.230  | 1.910 | 0.934 | 0.000 | 0.001 |
| FBgn0035147 | 2981.838  | 2048.744 | 3914.932  | 1.911 | 0.934 | 0.000 | 0.001 |
| FBgn0031895 | 400.610   | 275.209  | 526.011   | 1.911 | 0.935 | 0.001 | 0.003 |
| FBgn0011766 | 3366.235  | 2311.969 | 4420.500  | 1.912 | 0.935 | 0.000 | 0.001 |
| FBgn0001138 | 209.743   | 144.031  | 275.455   | 1.912 | 0.935 | 0.002 | 0.008 |
| FBgn0030316 | 387.390   | 266.016  | 508.764   | 1.913 | 0.935 | 0.000 | 0.003 |
| FBgn0031413 | 134.957   | 92.673   | 177.241   | 1.913 | 0.935 | 0.003 | 0.014 |
| FBgn0015402 | 1564.926  | 1074.455 | 2055.398  | 1.913 | 0.936 | 0.000 | 0.001 |
| FBgn0028685 | 2009.533  | 1379.490 | 2639.577  | 1.913 | 0.936 | 0.000 | 0.001 |
| FBgn0083949 | 3391.380  | 2328.050 | 4454.709  | 1.913 | 0.936 | 0.000 | 0.001 |
| FBgn0031022 | 272.733   | 187.219  | 358.247   | 1.914 | 0.936 | 0.001 | 0.004 |
| FBgn0003410 | 938.227   | 643.970  | 1232.484  | 1.914 | 0.937 | 0.000 | 0.001 |
| FBgn0029820 | 2444.445  | 1677.765 | 3211.126  | 1.914 | 0.937 | 0.000 | 0.001 |
| FBgn0038975 | 10449.712 | 7170.074 | 13729.349 | 1.915 | 0.937 | 0.000 | 0.001 |
| FBgn0021765 | 9565.629  | 6562.177 | 12569.080 | 1.915 | 0.938 | 0.003 | 0.013 |
| FBgn0033188 | 5312.100  | 3643.759 | 6980.441  | 1.916 | 0.938 | 0.000 | 0.001 |
| FBgn0010380 | 3691.062  | 2528.830 | 4853.294  | 1.919 | 0.940 | 0.000 | 0.001 |
| FBgn0000546 | 2013.592  | 1379.410 | 2647.774  | 1.919 | 0.941 | 0.000 | 0.003 |
| FBgn0034691 | 3979.459  | 2725.520 | 5233.398  | 1.920 | 0.941 | 0.000 | 0.001 |
| FBgn0020655 | 1517.300  | 1039.143 | 1995.458  | 1.920 | 0.941 | 0.000 | 0.001 |
| FBgn0263390 | 2578.271  | 1765.044 | 3391.498  | 1.921 | 0.942 | 0.009 | 0.031 |
| FBgn0029830 | 176.172   | 120.541  | 231.803   | 1.923 | 0.943 | 0.001 | 0.006 |
| FBgn0053193 | 601.339   | 411.360  | 791.318   | 1.924 | 0.944 | 0.001 | 0.005 |
| FBgn0025878 | 664.493   | 454.515  | 874.471   | 1.924 | 0.944 | 0.000 | 0.002 |
| FBgn0028342 | 9816.043  | 6713.971 | 12918.116 | 1.924 | 0.944 | 0.015 | 0.047 |
| FBgn0030731 | 4097.008  | 2801.507 | 5392.509  | 1.925 | 0.945 | 0.003 | 0.014 |
| FBgn0035558 | 1132.916  | 774.616  | 1491.216  | 1.925 | 0.945 | 0.000 | 0.001 |
| FBgn0263395 | 4638.388  | 3171.281 | 6105.496  | 1.925 | 0.945 | 0.000 | 0.001 |

|             |          |          |           |       |       |       |       |
|-------------|----------|----------|-----------|-------|-------|-------|-------|
| FBgn0021944 | 477.007  | 326.102  | 627.913   | 1.926 | 0.945 | 0.000 | 0.002 |
| FBgn0086384 | 1648.496 | 1126.639 | 2170.353  | 1.926 | 0.946 | 0.000 | 0.002 |
| FBgn0020510 | 961.721  | 657.102  | 1266.341  | 1.927 | 0.946 | 0.000 | 0.001 |
| FBgn0035041 | 1304.207 | 891.074  | 1717.341  | 1.927 | 0.947 | 0.000 | 0.001 |
| FBgn0264075 | 998.829  | 682.427  | 1315.232  | 1.927 | 0.947 | 0.000 | 0.003 |
| FBgn0261647 | 1498.982 | 1023.905 | 1974.059  | 1.928 | 0.947 | 0.000 | 0.001 |
| FBgn0038043 | 1577.275 | 1077.121 | 2077.430  | 1.929 | 0.948 | 0.000 | 0.001 |
| FBgn0052533 | 539.347  | 368.318  | 710.376   | 1.929 | 0.948 | 0.000 | 0.001 |
| FBgn0037627 | 764.294  | 521.822  | 1006.766  | 1.929 | 0.948 | 0.005 | 0.020 |
| FBgn0036341 | 1583.439 | 1081.072 | 2085.805  | 1.929 | 0.948 | 0.000 | 0.001 |
| FBgn0086736 | 2172.642 | 1483.232 | 2862.052  | 1.930 | 0.948 | 0.000 | 0.001 |
| FBgn0035050 | 750.768  | 512.509  | 989.026   | 1.930 | 0.948 | 0.000 | 0.001 |
| FBgn0035676 | 1512.209 | 1032.004 | 1992.414  | 1.931 | 0.949 | 0.000 | 0.001 |
| FBgn0003285 | 338.447  | 230.972  | 445.921   | 1.931 | 0.949 | 0.000 | 0.003 |
| FBgn0053548 | 3441.210 | 2348.425 | 4533.996  | 1.931 | 0.949 | 0.010 | 0.034 |
| FBgn0052062 | 5731.528 | 3910.351 | 7552.705  | 1.931 | 0.950 | 0.008 | 0.028 |
| FBgn0021979 | 9180.174 | 6261.916 | 12098.432 | 1.932 | 0.950 | 0.000 | 0.001 |
| FBgn0000533 | 348.625  | 237.798  | 459.451   | 1.932 | 0.950 | 0.000 | 0.003 |
| FBgn0037734 | 1721.941 | 1174.371 | 2269.512  | 1.933 | 0.950 | 0.000 | 0.001 |
| FBgn0031568 | 333.414  | 227.235  | 439.593   | 1.935 | 0.952 | 0.001 | 0.004 |
| FBgn0039346 | 112.136  | 76.389   | 147.884   | 1.936 | 0.953 | 0.005 | 0.019 |
| FBgn0066114 | 960.804  | 654.325  | 1267.283  | 1.937 | 0.954 | 0.000 | 0.002 |
| FBgn0031682 | 560.644  | 381.792  | 739.497   | 1.937 | 0.954 | 0.001 | 0.004 |
| FBgn0038098 | 412.727  | 280.982  | 544.472   | 1.938 | 0.954 | 0.000 | 0.002 |
| FBgn0263865 | 8193.290 | 5577.713 | 10808.867 | 1.938 | 0.954 | 0.000 | 0.002 |
| FBgn0040318 | 65.899   | 44.855   | 86.942    | 1.938 | 0.955 | 0.013 | 0.044 |
| FBgn0024234 | 1204.717 | 819.829  | 1589.606  | 1.939 | 0.955 | 0.000 | 0.001 |
| FBgn0250871 | 1161.124 | 790.082  | 1532.166  | 1.939 | 0.955 | 0.001 | 0.007 |
| FBgn0035542 | 7354.250 | 5003.231 | 9705.269  | 1.940 | 0.956 | 0.000 | 0.002 |
| FBgn0086408 | 209.371  | 142.423  | 276.320   | 1.940 | 0.956 | 0.001 | 0.005 |
| FBgn0013949 | 5950.593 | 4046.797 | 7854.389  | 1.941 | 0.957 | 0.000 | 0.000 |
| FBgn0022774 | 1363.908 | 927.521  | 1800.294  | 1.941 | 0.957 | 0.000 | 0.001 |
| FBgn0014859 | 649.893  | 441.800  | 857.985   | 1.942 | 0.958 | 0.000 | 0.001 |
| FBgn0033365 | 60.410   | 41.059   | 79.761    | 1.943 | 0.958 | 0.010 | 0.036 |

|             |            |           |            |       |       |       |       |
|-------------|------------|-----------|------------|-------|-------|-------|-------|
| FBgn0038220 | 2056.279   | 1397.582  | 2714.976   | 1.943 | 0.958 | 0.000 | 0.001 |
| FBgn0039747 | 295.231    | 200.562   | 389.900    | 1.944 | 0.959 | 0.000 | 0.003 |
| FBgn0029720 | 2074.734   | 1409.189  | 2740.279   | 1.945 | 0.959 | 0.000 | 0.001 |
| FBgn0263005 | 178.800    | 121.441   | 236.158    | 1.945 | 0.959 | 0.001 | 0.006 |
| FBgn0030963 | 104.827    | 71.178    | 138.476    | 1.945 | 0.960 | 0.005 | 0.019 |
| FBgn0264489 | 8154.776   | 5536.759  | 10772.792  | 1.946 | 0.960 | 0.012 | 0.039 |
| FBgn0010387 | 4051.881   | 2750.624  | 5353.139   | 1.946 | 0.961 | 0.003 | 0.012 |
| FBgn0041607 | 4528.248   | 3073.047  | 5983.450   | 1.947 | 0.961 | 0.000 | 0.000 |
| FBgn0261983 | 947.665    | 643.036   | 1252.295   | 1.947 | 0.962 | 0.007 | 0.027 |
| FBgn0037720 | 1705.730   | 1157.354  | 2254.106   | 1.948 | 0.962 | 0.000 | 0.001 |
| FBgn0033403 | 3751.570   | 2544.236  | 4958.905   | 1.949 | 0.963 | 0.000 | 0.001 |
| FBgn0029911 | 2335.252   | 1583.341  | 3087.164   | 1.950 | 0.963 | 0.000 | 0.001 |
| FBgn0039665 | 468.368    | 317.537   | 619.199    | 1.950 | 0.963 | 0.004 | 0.015 |
| FBgn0000556 | 130367.491 | 88362.729 | 172372.253 | 1.951 | 0.964 | 0.001 | 0.003 |
| FBgn0052808 | 180.038    | 122.022   | 238.053    | 1.951 | 0.964 | 0.001 | 0.007 |
| FBgn0030532 | 1437.379   | 974.146   | 1900.612   | 1.951 | 0.964 | 0.001 | 0.004 |
| FBgn0004396 | 1136.307   | 769.914   | 1502.700   | 1.952 | 0.965 | 0.009 | 0.032 |
| FBgn0014388 | 3438.000   | 2329.437  | 4546.562   | 1.952 | 0.965 | 0.000 | 0.001 |
| FBgn0029504 | 5051.159   | 3421.895  | 6680.423   | 1.952 | 0.965 | 0.000 | 0.001 |
| FBgn0040092 | 332.133    | 224.957   | 439.308    | 1.953 | 0.966 | 0.001 | 0.004 |
| FBgn0039118 | 655.361    | 443.765   | 866.958    | 1.954 | 0.966 | 0.000 | 0.001 |
| FBgn0030891 | 631.821    | 427.805   | 835.838    | 1.954 | 0.966 | 0.000 | 0.001 |
| FBgn0033166 | 2909.804   | 1970.117  | 3849.491   | 1.954 | 0.966 | 0.000 | 0.001 |
| FBgn0260648 | 184.708    | 124.977   | 244.439    | 1.956 | 0.968 | 0.001 | 0.006 |
| FBgn0003997 | 433.951    | 293.552   | 574.351    | 1.957 | 0.968 | 0.000 | 0.002 |
| FBgn0037705 | 8166.285   | 5523.150  | 10809.419  | 1.957 | 0.969 | 0.000 | 0.000 |
| FBgn0052532 | 418.862    | 283.189   | 554.534    | 1.958 | 0.970 | 0.000 | 0.002 |
| FBgn0261285 | 3372.518   | 2280.059  | 4464.978   | 1.958 | 0.970 | 0.000 | 0.000 |
| FBgn0038271 | 11901.729  | 8043.799  | 15759.659  | 1.959 | 0.970 | 0.000 | 0.000 |
| FBgn0024754 | 1625.366   | 1097.886  | 2152.847   | 1.961 | 0.972 | 0.000 | 0.001 |
| FBgn0010830 | 1005.751   | 679.085   | 1332.417   | 1.962 | 0.972 | 0.000 | 0.001 |
| FBgn0028543 | 6843.076   | 4618.319  | 9067.833   | 1.963 | 0.973 | 0.000 | 0.000 |
| FBgn0004858 | 1185.204   | 799.681   | 1570.728   | 1.964 | 0.974 | 0.002 | 0.011 |
| FBgn0052667 | 8176.016   | 5515.119  | 10836.912  | 1.965 | 0.974 | 0.006 | 0.024 |

|             |           |           |            |       |       |       |       |
|-------------|-----------|-----------|------------|-------|-------|-------|-------|
| FBgn0037164 | 559.471   | 377.363   | 741.579    | 1.965 | 0.975 | 0.004 | 0.018 |
| FBgn0031817 | 882.376   | 595.055   | 1169.697   | 1.966 | 0.975 | 0.000 | 0.001 |
| FBgn0026713 | 1106.064  | 745.830   | 1466.298   | 1.966 | 0.975 | 0.000 | 0.001 |
| FBgn0030797 | 177.034   | 119.375   | 234.693    | 1.966 | 0.975 | 0.011 | 0.038 |
| FBgn0051235 | 223.285   | 150.500   | 296.070    | 1.967 | 0.976 | 0.000 | 0.003 |
| FBgn0031016 | 1463.908  | 986.639   | 1941.177   | 1.967 | 0.976 | 0.000 | 0.001 |
| FBgn0034985 | 3078.058  | 2074.372  | 4081.743   | 1.968 | 0.977 | 0.000 | 0.001 |
| FBgn0030853 | 4438.077  | 2990.759  | 5885.396   | 1.968 | 0.977 | 0.008 | 0.029 |
| FBgn0261444 | 6155.799  | 4148.188  | 8163.410   | 1.968 | 0.977 | 0.000 | 0.000 |
| FBgn0044823 | 165.727   | 111.626   | 219.828    | 1.969 | 0.978 | 0.014 | 0.046 |
| FBgn0003462 | 12810.852 | 8627.310  | 16994.395  | 1.970 | 0.978 | 0.001 | 0.006 |
| FBgn0030530 | 900.098   | 606.016   | 1194.179   | 1.971 | 0.979 | 0.000 | 0.001 |
| FBgn0030008 | 132.834   | 89.424    | 176.243    | 1.971 | 0.979 | 0.002 | 0.010 |
| FBgn0000046 | 1771.974  | 1192.806  | 2351.143   | 1.971 | 0.979 | 0.001 | 0.007 |
| FBgn0031256 | 577.779   | 388.931   | 766.628    | 1.971 | 0.979 | 0.000 | 0.001 |
| FBgn0264598 | 10639.228 | 7160.774  | 14117.682  | 1.972 | 0.979 | 0.000 | 0.000 |
| FBgn0030638 | 954.134   | 642.176   | 1266.092   | 1.972 | 0.979 | 0.001 | 0.004 |
| FBgn0004057 | 898.990   | 604.762   | 1193.219   | 1.973 | 0.980 | 0.000 | 0.001 |
| FBgn0085257 | 161.672   | 108.730   | 214.614    | 1.974 | 0.981 | 0.001 | 0.007 |
| FBgn0040900 | 96.421    | 64.839    | 128.003    | 1.974 | 0.981 | 0.007 | 0.025 |
| FBgn0035092 | 2833.716  | 1904.505  | 3762.927   | 1.976 | 0.982 | 0.000 | 0.000 |
| FBgn0002567 | 7240.667  | 4865.289  | 9616.044   | 1.976 | 0.983 | 0.000 | 0.000 |
| FBgn0038145 | 12859.368 | 8640.188  | 17078.548  | 1.977 | 0.983 | 0.000 | 0.000 |
| FBgn0031020 | 2626.534  | 1762.755  | 3490.314   | 1.980 | 0.986 | 0.000 | 0.000 |
| FBgn0022160 | 8156.911  | 5473.945  | 10839.877  | 1.980 | 0.986 | 0.000 | 0.000 |
| FBgn0031106 | 1037.022  | 695.771   | 1378.274   | 1.981 | 0.986 | 0.000 | 0.001 |
| FBgn0031294 | 98630.461 | 66162.148 | 131098.774 | 1.981 | 0.987 | 0.000 | 0.000 |
| FBgn0030806 | 466.839   | 313.089   | 620.589    | 1.982 | 0.987 | 0.002 | 0.009 |
| FBgn0015781 | 553.358   | 371.113   | 735.603    | 1.982 | 0.987 | 0.000 | 0.001 |
| FBgn0000520 | 536.050   | 359.433   | 712.666    | 1.983 | 0.988 | 0.000 | 0.001 |
| FBgn0031174 | 1723.778  | 1155.527  | 2292.030   | 1.984 | 0.988 | 0.000 | 0.000 |
| FBgn0027493 | 4479.672  | 3001.941  | 5957.402   | 1.985 | 0.989 | 0.000 | 0.000 |
| FBgn0032180 | 767.444   | 514.277   | 1020.610   | 1.985 | 0.989 | 0.000 | 0.001 |
| FBgn0010313 | 4614.162  | 3090.921  | 6137.403   | 1.986 | 0.990 | 0.004 | 0.017 |

|             |           |           |           |       |       |       |       |
|-------------|-----------|-----------|-----------|-------|-------|-------|-------|
| FBgn0038815 | 1090.751  | 730.539   | 1450.963  | 1.986 | 0.990 | 0.000 | 0.001 |
| FBgn0051548 | 1889.826  | 1265.314  | 2514.338  | 1.987 | 0.991 | 0.000 | 0.000 |
| FBgn0039026 | 12923.440 | 8652.689  | 17194.192 | 1.987 | 0.991 | 0.000 | 0.000 |
| FBgn0033739 | 3768.551  | 2523.075  | 5014.026  | 1.987 | 0.991 | 0.000 | 0.000 |
| FBgn0035253 | 26537.204 | 17756.876 | 35317.532 | 1.989 | 0.992 | 0.000 | 0.000 |
| FBgn0261545 | 437.442   | 292.684   | 582.199   | 1.989 | 0.992 | 0.000 | 0.002 |
| FBgn0003093 | 4221.879  | 2824.714  | 5619.044  | 1.989 | 0.992 | 0.000 | 0.000 |
| FBgn0033340 | 2048.743  | 1370.569  | 2726.917  | 1.990 | 0.992 | 0.001 | 0.004 |
| FBgn0002932 | 201.189   | 134.569   | 267.809   | 1.990 | 0.993 | 0.001 | 0.004 |
| FBgn0028979 | 323.163   | 216.106   | 430.220   | 1.991 | 0.993 | 0.001 | 0.006 |
| FBgn0036935 | 2220.248  | 1484.505  | 2955.990  | 1.991 | 0.994 | 0.000 | 0.000 |
| FBgn0000150 | 18131.031 | 12120.664 | 24141.399 | 1.992 | 0.994 | 0.000 | 0.002 |
| FBgn0033405 | 445.712   | 297.929   | 593.496   | 1.992 | 0.994 | 0.000 | 0.001 |
| FBgn0013972 | 3769.442  | 2519.346  | 5019.537  | 1.992 | 0.995 | 0.000 | 0.000 |
| FBgn0024362 | 1418.067  | 946.968   | 1889.166  | 1.995 | 0.996 | 0.000 | 0.001 |
| FBgn0264442 | 2516.234  | 1678.259  | 3354.208  | 1.999 | 0.999 | 0.000 | 0.000 |
| FBgn0031040 | 1410.731  | 940.872   | 1880.591  | 1.999 | 0.999 | 0.001 | 0.004 |
| FBgn0041342 | 3339.188  | 2225.994  | 4452.381  | 2.000 | 1.000 | 0.000 | 0.000 |
| FBgn0035283 | 2106.190  | 1403.455  | 2808.925  | 2.001 | 1.001 | 0.000 | 0.003 |
| FBgn0038806 | 762.463   | 507.994   | 1016.932  | 2.002 | 1.001 | 0.000 | 0.002 |
| FBgn0033438 | 1725.086  | 1149.023  | 2301.149  | 2.003 | 1.002 | 0.000 | 0.000 |
| FBgn0034970 | 1295.665  | 862.604   | 1728.727  | 2.004 | 1.003 | 0.000 | 0.000 |
| FBgn0085400 | 1470.513  | 978.964   | 1962.062  | 2.004 | 1.003 | 0.000 | 0.000 |
| FBgn0029897 | 24801.674 | 16507.769 | 33095.579 | 2.005 | 1.003 | 0.002 | 0.010 |
| FBgn0036732 | 1535.020  | 1021.634  | 2048.407  | 2.005 | 1.004 | 0.000 | 0.000 |
| FBgn0034915 | 1051.803  | 699.892   | 1403.715  | 2.006 | 1.004 | 0.000 | 0.000 |
| FBgn0261597 | 39495.666 | 26279.873 | 52711.458 | 2.006 | 1.004 | 0.013 | 0.043 |
| FBgn0035181 | 3006.653  | 2000.139  | 4013.167  | 2.006 | 1.005 | 0.008 | 0.028 |
| FBgn0030662 | 667.977   | 444.283   | 891.672   | 2.007 | 1.005 | 0.000 | 0.001 |
| FBgn0039461 | 488.171   | 324.684   | 651.658   | 2.007 | 1.005 | 0.000 | 0.001 |
| FBgn0262114 | 5756.298  | 3828.153  | 7684.444  | 2.007 | 1.005 | 0.000 | 0.000 |
| FBgn0085390 | 2354.109  | 1565.226  | 3142.992  | 2.008 | 1.006 | 0.000 | 0.000 |
| FBgn0000257 | 782.610   | 520.344   | 1044.877  | 2.008 | 1.006 | 0.000 | 0.001 |
| FBgn0259923 | 1681.330  | 1117.817  | 2244.842  | 2.008 | 1.006 | 0.000 | 0.000 |

|             |             |             |             |       |       |       |       |
|-------------|-------------|-------------|-------------|-------|-------|-------|-------|
| FBgn0264357 | 5844.627    | 3885.544    | 7803.710    | 2.008 | 1.006 | 0.000 | 0.000 |
| FBgn0034693 | 9201.166    | 6115.102    | 12287.229   | 2.009 | 1.007 | 0.000 | 0.000 |
| FBgn0040394 | 1302.038    | 865.023     | 1739.053    | 2.010 | 1.007 | 0.000 | 0.000 |
| FBgn0000395 | 728.704     | 484.075     | 973.332     | 2.011 | 1.008 | 0.012 | 0.040 |
| FBgn0039212 | 836.546     | 555.711     | 1117.381    | 2.011 | 1.008 | 0.000 | 0.001 |
| FBgn0020269 | 1236.966    | 821.411     | 1652.521    | 2.012 | 1.008 | 0.000 | 0.000 |
| FBgn0027585 | 4165.619    | 2765.322    | 5565.917    | 2.013 | 1.009 | 0.000 | 0.000 |
| FBgn0002940 | 1523809.181 | 1011384.455 | 2036233.907 | 2.013 | 1.010 | 0.000 | 0.000 |
| FBgn0051530 | 1067.173    | 708.292     | 1426.055    | 2.013 | 1.010 | 0.000 | 0.000 |
| FBgn0024364 | 537.456     | 356.656     | 718.255     | 2.014 | 1.010 | 0.000 | 0.001 |
| FBgn0030318 | 563.003     | 373.551     | 752.455     | 2.014 | 1.010 | 0.001 | 0.006 |
| FBgn0031077 | 547.938     | 363.494     | 732.382     | 2.015 | 1.011 | 0.000 | 0.001 |
| FBgn0052549 | 9001.080    | 5970.034    | 12032.127   | 2.015 | 1.011 | 0.000 | 0.000 |
| FBgn0033814 | 2146.264    | 1423.184    | 2869.343    | 2.016 | 1.012 | 0.000 | 0.000 |
| FBgn0003475 | 6352.622    | 4211.945    | 8493.299    | 2.016 | 1.012 | 0.000 | 0.000 |
| FBgn0003885 | 2100.802    | 1392.740    | 2808.863    | 2.017 | 1.012 | 0.000 | 0.000 |
| FBgn0261341 | 525.690     | 348.457     | 702.923     | 2.017 | 1.012 | 0.003 | 0.013 |
| FBgn0263706 | 2050.472    | 1358.560    | 2742.383    | 2.019 | 1.013 | 0.000 | 0.000 |
| FBgn0261509 | 1086.672    | 719.365     | 1453.979    | 2.021 | 1.015 | 0.000 | 0.000 |
| FBgn0031391 | 604.977     | 400.164     | 809.789     | 2.024 | 1.017 | 0.000 | 0.001 |
| FBgn0030915 | 476.227     | 314.932     | 637.522     | 2.024 | 1.017 | 0.000 | 0.001 |
| FBgn0033907 | 853.836     | 564.633     | 1143.038    | 2.024 | 1.017 | 0.003 | 0.013 |
| FBgn0034434 | 1019.625    | 674.198     | 1365.053    | 2.025 | 1.018 | 0.000 | 0.000 |
| FBgn0027795 | 110.513     | 73.072      | 147.953     | 2.025 | 1.018 | 0.004 | 0.016 |
| FBgn0050446 | 275.541     | 182.097     | 368.984     | 2.026 | 1.019 | 0.000 | 0.002 |
| FBgn0261588 | 3384.825    | 2236.689    | 4532.962    | 2.027 | 1.019 | 0.000 | 0.003 |
| FBgn0033812 | 1940.701    | 1281.780    | 2599.622    | 2.028 | 1.020 | 0.000 | 0.000 |
| FBgn0034504 | 3894.036    | 2571.499    | 5216.573    | 2.029 | 1.020 | 0.000 | 0.000 |
| FBgn0024841 | 4343.995    | 2868.249    | 5819.741    | 2.029 | 1.021 | 0.001 | 0.004 |
| FBgn0039767 | 1637.613    | 1081.252    | 2193.975    | 2.029 | 1.021 | 0.000 | 0.000 |
| FBgn0034877 | 12588.328   | 8311.050    | 16865.606   | 2.029 | 1.021 | 0.004 | 0.017 |
| FBgn0004875 | 9840.177    | 6493.813    | 13186.541   | 2.031 | 1.022 | 0.000 | 0.000 |
| FBgn0004867 | 31284.990   | 20643.118   | 41926.862   | 2.031 | 1.022 | 0.000 | 0.002 |
| FBgn0037130 | 1111.171    | 733.145     | 1489.198    | 2.031 | 1.022 | 0.000 | 0.000 |

|             |           |           |           |       |       |       |       |
|-------------|-----------|-----------|-----------|-------|-------|-------|-------|
| FBgn0029157 | 2600.608  | 1715.484  | 3485.733  | 2.032 | 1.023 | 0.000 | 0.000 |
| FBgn0030886 | 260.251   | 171.600   | 348.902   | 2.033 | 1.024 | 0.000 | 0.003 |
| FBgn0028480 | 15441.176 | 10179.806 | 20702.546 | 2.034 | 1.024 | 0.000 | 0.000 |
| FBgn0250874 | 1771.551  | 1167.834  | 2375.268  | 2.034 | 1.024 | 0.000 | 0.003 |
| FBgn0039459 | 166.511   | 109.694   | 223.327   | 2.036 | 1.026 | 0.001 | 0.005 |
| FBgn0039698 | 1074.768  | 708.024   | 1441.511  | 2.036 | 1.026 | 0.000 | 0.002 |
| FBgn0040877 | 393.334   | 259.067   | 527.602   | 2.037 | 1.026 | 0.000 | 0.001 |
| FBgn0051626 | 68.257    | 44.952    | 91.562    | 2.037 | 1.026 | 0.008 | 0.028 |
| FBgn0000100 | 34938.226 | 23008.132 | 46868.321 | 2.037 | 1.026 | 0.000 | 0.002 |
| FBgn0035241 | 82.187    | 54.123    | 110.252   | 2.037 | 1.026 | 0.003 | 0.012 |
| FBgn0086655 | 2413.053  | 1587.618  | 3238.487  | 2.040 | 1.028 | 0.000 | 0.001 |
| FBgn0263705 | 1309.790  | 861.673   | 1757.906  | 2.040 | 1.029 | 0.000 | 0.000 |
| FBgn0030272 | 20426.266 | 13437.389 | 27415.142 | 2.040 | 1.029 | 0.002 | 0.009 |
| FBgn0031068 | 754.874   | 496.556   | 1013.192  | 2.040 | 1.029 | 0.000 | 0.002 |
| FBgn0017561 | 1352.285  | 889.008   | 1815.562  | 2.042 | 1.030 | 0.001 | 0.003 |
| FBgn0031061 | 1165.987  | 766.442   | 1565.532  | 2.043 | 1.030 | 0.000 | 0.000 |
| FBgn0039697 | 7182.213  | 4720.784  | 9643.643  | 2.043 | 1.031 | 0.012 | 0.039 |
| FBgn0033349 | 1032.587  | 678.687   | 1386.488  | 2.043 | 1.031 | 0.000 | 0.001 |
| FBgn0031023 | 4959.716  | 3259.647  | 6659.784  | 2.043 | 1.031 | 0.000 | 0.000 |
| FBgn0031697 | 749.411   | 492.413   | 1006.409  | 2.044 | 1.031 | 0.000 | 0.000 |
| FBgn0028400 | 5146.381  | 3381.239  | 6911.522  | 2.044 | 1.031 | 0.000 | 0.000 |
| FBgn0043900 | 1480.862  | 972.707   | 1989.016  | 2.045 | 1.032 | 0.000 | 0.000 |
| FBgn0029912 | 1642.218  | 1078.449  | 2205.988  | 2.046 | 1.032 | 0.000 | 0.000 |
| FBgn0020304 | 5610.664  | 3684.177  | 7537.151  | 2.046 | 1.033 | 0.000 | 0.000 |
| FBgn0010383 | 1233.862  | 810.118   | 1657.607  | 2.046 | 1.033 | 0.000 | 0.001 |
| FBgn0031118 | 5378.844  | 3529.927  | 7227.761  | 2.048 | 1.034 | 0.000 | 0.000 |
| FBgn0031299 | 2518.515  | 1652.087  | 3384.943  | 2.049 | 1.035 | 0.000 | 0.000 |
| FBgn0011211 | 45398.264 | 29773.800 | 61022.728 | 2.050 | 1.035 | 0.000 | 0.000 |
| FBgn0037856 | 510.896   | 335.031   | 686.760   | 2.050 | 1.036 | 0.000 | 0.001 |
| FBgn0264090 | 371.278   | 243.385   | 499.170   | 2.051 | 1.036 | 0.001 | 0.006 |
| FBgn0036202 | 1595.181  | 1045.458  | 2144.903  | 2.052 | 1.037 | 0.000 | 0.002 |
| FBgn0031099 | 1970.087  | 1290.863  | 2649.310  | 2.052 | 1.037 | 0.000 | 0.000 |
| FBgn0260866 | 1430.333  | 936.974   | 1923.692  | 2.053 | 1.038 | 0.000 | 0.000 |
| FBgn0038590 | 278.886   | 182.674   | 375.098   | 2.053 | 1.038 | 0.000 | 0.002 |



|             |           |           |           |       |       |       |       |
|-------------|-----------|-----------|-----------|-------|-------|-------|-------|
| FBgn0030874 | 188.061   | 123.176   | 252.947   | 2.054 | 1.038 | 0.001 | 0.004 |
| FBgn0036237 | 1270.046  | 831.788   | 1708.304  | 2.054 | 1.038 | 0.001 | 0.007 |
| FBgn0031959 | 110.624   | 72.432    | 148.815   | 2.055 | 1.039 | 0.001 | 0.005 |
| FBgn0259099 | 374.143   | 244.748   | 503.537   | 2.057 | 1.041 | 0.000 | 0.001 |
| FBgn0000210 | 1769.856  | 1157.681  | 2382.031  | 2.058 | 1.041 | 0.000 | 0.001 |
| FBgn0004397 | 4785.900  | 3130.337  | 6441.462  | 2.058 | 1.041 | 0.001 | 0.004 |
| FBgn0026562 | 22325.865 | 14600.406 | 30051.323 | 2.058 | 1.041 | 0.000 | 0.000 |
| FBgn0023521 | 242.534   | 158.607   | 326.461   | 2.058 | 1.041 | 0.000 | 0.002 |
| FBgn0032538 | 251.166   | 164.209   | 338.124   | 2.059 | 1.042 | 0.005 | 0.020 |
| FBgn0039580 | 1414.840  | 924.934   | 1904.745  | 2.059 | 1.042 | 0.000 | 0.000 |
| FBgn0036314 | 837.251   | 547.281   | 1127.222  | 2.060 | 1.042 | 0.000 | 0.002 |
| FBgn0033235 | 1423.112  | 929.602   | 1916.623  | 2.062 | 1.044 | 0.000 | 0.000 |
| FBgn0029890 | 67.195    | 43.858    | 90.533    | 2.064 | 1.046 | 0.011 | 0.037 |
| FBgn0028327 | 3166.486  | 2066.067  | 4266.905  | 2.065 | 1.046 | 0.000 | 0.000 |
| FBgn0033210 | 179.206   | 116.904   | 241.508   | 2.066 | 1.047 | 0.001 | 0.003 |
| FBgn0030991 | 1587.469  | 1035.491  | 2139.448  | 2.066 | 1.047 | 0.000 | 0.000 |
| FBgn0029131 | 1115.416  | 727.286   | 1503.546  | 2.067 | 1.048 | 0.000 | 0.000 |
| FBgn0000442 | 50.883    | 33.175    | 68.590    | 2.068 | 1.048 | 0.014 | 0.047 |
| FBgn0259244 | 4213.221  | 2746.460  | 5679.981  | 2.068 | 1.048 | 0.000 | 0.000 |
| FBgn0015019 | 2131.494  | 1389.319  | 2873.668  | 2.068 | 1.049 | 0.000 | 0.000 |
| FBgn0031055 | 618.818   | 403.216   | 834.419   | 2.069 | 1.049 | 0.000 | 0.000 |
| FBgn0030403 | 1768.851  | 1152.292  | 2385.409  | 2.070 | 1.050 | 0.000 | 0.000 |
| FBgn0015527 | 946.467   | 616.282   | 1276.652  | 2.072 | 1.051 | 0.000 | 0.000 |
| FBgn0033480 | 1041.571  | 678.043   | 1405.099  | 2.072 | 1.051 | 0.002 | 0.008 |
| FBgn0031064 | 2319.602  | 1509.801  | 3129.404  | 2.073 | 1.052 | 0.000 | 0.000 |
| FBgn0000052 | 3091.071  | 2011.861  | 4170.280  | 2.073 | 1.052 | 0.000 | 0.000 |
| FBgn0013680 | 19976.171 | 12998.813 | 26953.528 | 2.074 | 1.052 | 0.000 | 0.003 |
| FBgn0004832 | 388.996   | 253.048   | 524.943   | 2.074 | 1.053 | 0.000 | 0.001 |
| FBgn0027785 | 7982.671  | 5191.145  | 10774.197 | 2.075 | 1.053 | 0.008 | 0.031 |
| FBgn0027791 | 524.697   | 341.188   | 708.207   | 2.076 | 1.054 | 0.000 | 0.000 |
| FBgn0243512 | 1747.090  | 1136.010  | 2358.171  | 2.076 | 1.054 | 0.000 | 0.000 |
| FBgn0027087 | 2202.103  | 1431.494  | 2972.712  | 2.077 | 1.054 | 0.000 | 0.000 |
| FBgn0030802 | 1451.074  | 943.217   | 1958.931  | 2.077 | 1.054 | 0.000 | 0.002 |
| FBgn0035033 | 612.550   | 397.938   | 827.163   | 2.079 | 1.056 | 0.000 | 0.000 |

|             |           |           |           |       |       |       |       |
|-------------|-----------|-----------|-----------|-------|-------|-------|-------|
| FBgn0030954 | 462.890   | 300.654   | 625.127   | 2.079 | 1.056 | 0.000 | 0.001 |
| FBgn0031702 | 2526.303  | 1640.029  | 3412.577  | 2.081 | 1.057 | 0.000 | 0.000 |
| FBgn0053558 | 7741.537  | 5025.318  | 10457.757 | 2.081 | 1.057 | 0.000 | 0.000 |
| FBgn0263772 | 1148.928  | 745.692   | 1552.164  | 2.082 | 1.058 | 0.000 | 0.000 |
| FBgn0030921 | 1098.707  | 712.986   | 1484.428  | 2.082 | 1.058 | 0.006 | 0.022 |
| FBgn0053052 | 319.056   | 206.964   | 431.148   | 2.083 | 1.059 | 0.000 | 0.001 |
| FBgn0030648 | 3302.898  | 2142.504  | 4463.292  | 2.083 | 1.059 | 0.000 | 0.000 |
| FBgn0035988 | 79.272    | 51.421    | 107.122   | 2.083 | 1.059 | 0.012 | 0.040 |
| FBgn0026239 | 1593.818  | 1033.802  | 2153.833  | 2.083 | 1.059 | 0.000 | 0.000 |
| FBgn0261561 | 245.499   | 159.187   | 331.810   | 2.084 | 1.060 | 0.000 | 0.001 |
| FBgn0262160 | 13982.585 | 9063.753  | 18901.416 | 2.085 | 1.060 | 0.000 | 0.000 |
| FBgn0003507 | 4620.138  | 2994.655  | 6245.621  | 2.086 | 1.060 | 0.000 | 0.000 |
| FBgn0034885 | 8408.836  | 5450.364  | 11367.308 | 2.086 | 1.060 | 0.000 | 0.002 |
| FBgn0003517 | 37559.047 | 24331.634 | 50786.460 | 2.087 | 1.062 | 0.004 | 0.016 |
| FBgn0262483 | 7812.594  | 5059.375  | 10565.812 | 2.088 | 1.062 | 0.000 | 0.000 |
| FBgn0011787 | 2028.415  | 1313.239  | 2743.591  | 2.089 | 1.063 | 0.003 | 0.015 |
| FBgn0034069 | 1053.238  | 681.650   | 1424.827  | 2.090 | 1.064 | 0.000 | 0.000 |
| FBgn0005677 | 1308.113  | 846.568   | 1769.658  | 2.090 | 1.064 | 0.000 | 0.000 |
| FBgn0037876 | 373.368   | 241.305   | 505.432   | 2.095 | 1.067 | 0.000 | 0.001 |
| FBgn0037024 | 1756.271  | 1133.741  | 2378.802  | 2.098 | 1.069 | 0.000 | 0.000 |
| FBgn0040346 | 822.109   | 530.490   | 1113.727  | 2.099 | 1.070 | 0.000 | 0.000 |
| FBgn0086355 | 9852.750  | 6355.428  | 13350.072 | 2.101 | 1.071 | 0.000 | 0.000 |
| FBgn0033033 | 3709.038  | 2392.451  | 5025.626  | 2.101 | 1.071 | 0.001 | 0.004 |
| FBgn0043854 | 103.653   | 66.767    | 140.538   | 2.105 | 1.074 | 0.003 | 0.012 |
| FBgn0039664 | 284.021   | 182.897   | 385.144   | 2.106 | 1.074 | 0.000 | 0.001 |
| FBgn0029905 | 1182.844  | 761.336   | 1604.352  | 2.107 | 1.075 | 0.001 | 0.005 |
| FBgn0003499 | 881.591   | 567.186   | 1195.996  | 2.109 | 1.076 | 0.004 | 0.016 |
| FBgn0030230 | 1648.131  | 1060.128  | 2236.134  | 2.109 | 1.077 | 0.000 | 0.002 |
| FBgn0020299 | 1561.206  | 1003.552  | 2118.860  | 2.111 | 1.078 | 0.000 | 0.000 |
| FBgn0032871 | 201.901   | 129.775   | 274.027   | 2.112 | 1.078 | 0.000 | 0.002 |
| FBgn0030894 | 468.833   | 301.312   | 636.354   | 2.112 | 1.079 | 0.000 | 0.000 |
| FBgn0020257 | 1338.419  | 859.897   | 1816.941  | 2.113 | 1.079 | 0.000 | 0.000 |
| FBgn0025625 | 4557.520  | 2926.448  | 6188.591  | 2.115 | 1.080 | 0.000 | 0.000 |
| FBgn0263355 | 1282.798  | 823.045   | 1742.551  | 2.117 | 1.082 | 0.000 | 0.000 |

|             |           |          |           |       |       |       |       |
|-------------|-----------|----------|-----------|-------|-------|-------|-------|
| FBgn0003366 | 3174.569  | 2036.316 | 4312.822  | 2.118 | 1.083 | 0.000 | 0.000 |
| FBgn0030945 | 530.054   | 339.963  | 720.144   | 2.118 | 1.083 | 0.000 | 0.000 |
| FBgn0003964 | 2319.979  | 1487.710 | 3152.249  | 2.119 | 1.083 | 0.000 | 0.001 |
| FBgn0022702 | 468.148   | 300.010  | 636.285   | 2.121 | 1.085 | 0.000 | 0.000 |
| FBgn0001083 | 303.689   | 194.611  | 412.768   | 2.121 | 1.085 | 0.000 | 0.001 |
| FBgn0029763 | 1738.091  | 1112.979 | 2363.204  | 2.123 | 1.086 | 0.000 | 0.000 |
| FBgn0011570 | 668.246   | 427.901  | 908.590   | 2.123 | 1.086 | 0.000 | 0.000 |
| FBgn0052675 | 2691.313  | 1723.207 | 3659.420  | 2.124 | 1.087 | 0.000 | 0.000 |
| FBgn0032726 | 603.503   | 386.392  | 820.614   | 2.124 | 1.087 | 0.001 | 0.003 |
| FBgn0053513 | 2195.071  | 1405.045 | 2985.097  | 2.125 | 1.087 | 0.000 | 0.000 |
| FBgn0030974 | 3207.957  | 2052.843 | 4363.071  | 2.125 | 1.088 | 0.000 | 0.000 |
| FBgn0001098 | 10727.026 | 6863.965 | 14590.088 | 2.126 | 1.088 | 0.000 | 0.002 |
| FBgn0019830 | 3810.319  | 2435.636 | 5185.001  | 2.129 | 1.090 | 0.001 | 0.003 |
| FBgn0025640 | 1893.827  | 1210.439 | 2577.215  | 2.129 | 1.090 | 0.002 | 0.009 |
| FBgn0029857 | 913.348   | 583.575  | 1243.120  | 2.130 | 1.091 | 0.000 | 0.000 |
| FBgn0034497 | 3017.235  | 1927.557 | 4106.913  | 2.131 | 1.091 | 0.000 | 0.002 |
| FBgn0036725 | 953.118   | 608.699  | 1297.538  | 2.132 | 1.092 | 0.000 | 0.000 |
| FBgn0030077 | 191.681   | 122.372  | 260.991   | 2.133 | 1.093 | 0.000 | 0.002 |
| FBgn0085249 | 439.648   | 280.513  | 598.783   | 2.135 | 1.094 | 0.007 | 0.025 |
| FBgn0010575 | 9665.736  | 6161.869 | 13169.604 | 2.137 | 1.096 | 0.000 | 0.000 |
| FBgn0037672 | 109.799   | 69.987   | 149.611   | 2.138 | 1.096 | 0.003 | 0.012 |
| FBgn0020379 | 786.390   | 501.078  | 1071.702  | 2.139 | 1.097 | 0.000 | 0.000 |
| FBgn0034010 | 2327.549  | 1482.728 | 3172.371  | 2.140 | 1.097 | 0.000 | 0.001 |
| FBgn0032814 | 636.792   | 405.215  | 868.369   | 2.143 | 1.100 | 0.000 | 0.000 |
| FBgn0263258 | 1971.296  | 1254.147 | 2688.444  | 2.144 | 1.100 | 0.001 | 0.003 |
| FBgn0000097 | 2148.405  | 1366.800 | 2930.009  | 2.144 | 1.100 | 0.000 | 0.002 |
| FBgn0050431 | 1416.881  | 901.250  | 1932.513  | 2.144 | 1.100 | 0.011 | 0.037 |
| FBgn0010397 | 1466.601  | 932.308  | 2000.893  | 2.146 | 1.102 | 0.000 | 0.000 |
| FBgn0038530 | 53.760    | 34.173   | 73.346    | 2.146 | 1.102 | 0.003 | 0.014 |
| FBgn0052676 | 3547.805  | 2254.784 | 4840.825  | 2.147 | 1.102 | 0.000 | 0.000 |
| FBgn0033266 | 715.254   | 454.556  | 975.952   | 2.147 | 1.102 | 0.000 | 0.000 |
| FBgn0000568 | 8281.215  | 5261.961 | 11300.469 | 2.148 | 1.103 | 0.000 | 0.000 |
| FBgn0051313 | 2669.685  | 1696.317 | 3643.053  | 2.148 | 1.103 | 0.001 | 0.004 |
| FBgn0038107 | 3086.942  | 1961.388 | 4212.496  | 2.148 | 1.103 | 0.007 | 0.028 |

|             |           |           |           |       |       |       |       |
|-------------|-----------|-----------|-----------|-------|-------|-------|-------|
| FBgn0036369 | 1088.613  | 691.397   | 1485.828  | 2.149 | 1.104 | 0.000 | 0.000 |
| FBgn0052506 | 1304.733  | 828.323   | 1781.144  | 2.150 | 1.105 | 0.000 | 0.000 |
| FBgn0024184 | 107.929   | 68.505    | 147.353   | 2.151 | 1.105 | 0.002 | 0.008 |
| FBgn0030581 | 6493.172  | 4120.095  | 8866.249  | 2.152 | 1.106 | 0.000 | 0.000 |
| FBgn0030766 | 406.911   | 258.195   | 555.627   | 2.152 | 1.106 | 0.003 | 0.012 |
| FBgn0046214 | 2432.593  | 1543.266  | 3321.920  | 2.153 | 1.106 | 0.000 | 0.000 |
| FBgn0000286 | 2746.264  | 1742.000  | 3750.528  | 2.153 | 1.106 | 0.000 | 0.000 |
| FBgn0016076 | 2316.592  | 1469.263  | 3163.921  | 2.153 | 1.107 | 0.003 | 0.013 |
| FBgn0003888 | 336.195   | 213.176   | 459.214   | 2.154 | 1.107 | 0.005 | 0.019 |
| FBgn0013764 | 1779.841  | 1128.232  | 2431.451  | 2.155 | 1.108 | 0.000 | 0.000 |
| FBgn0033122 | 953.979   | 604.661   | 1303.298  | 2.155 | 1.108 | 0.001 | 0.005 |
| FBgn0030798 | 1143.239  | 724.580   | 1561.897  | 2.156 | 1.108 | 0.000 | 0.001 |
| FBgn0036223 | 257.087   | 162.850   | 351.324   | 2.157 | 1.109 | 0.000 | 0.001 |
| FBgn0259166 | 2273.511  | 1439.450  | 3107.573  | 2.159 | 1.110 | 0.000 | 0.000 |
| FBgn0030056 | 882.311   | 558.321   | 1206.302  | 2.161 | 1.111 | 0.000 | 0.000 |
| FBgn0035266 | 1622.900  | 1026.797  | 2219.003  | 2.161 | 1.112 | 0.000 | 0.000 |
| FBgn0021967 | 8137.199  | 5142.176  | 11132.222 | 2.165 | 1.114 | 0.000 | 0.000 |
| FBgn0013469 | 204.432   | 129.153   | 279.712   | 2.166 | 1.115 | 0.000 | 0.002 |
| FBgn0260747 | 15614.720 | 9864.508  | 21364.932 | 2.166 | 1.115 | 0.001 | 0.005 |
| FBgn0001142 | 6458.869  | 4080.179  | 8837.559  | 2.166 | 1.115 | 0.000 | 0.000 |
| FBgn0032781 | 626.181   | 395.478   | 856.883   | 2.167 | 1.115 | 0.000 | 0.000 |
| FBgn0037351 | 57208.344 | 36130.646 | 78286.043 | 2.167 | 1.116 | 0.001 | 0.005 |
| FBgn0052479 | 3415.008  | 2156.033  | 4673.984  | 2.168 | 1.116 | 0.000 | 0.001 |
| FBgn0263873 | 3824.725  | 2414.471  | 5234.979  | 2.168 | 1.116 | 0.000 | 0.000 |
| FBgn0035294 | 742.959   | 468.964   | 1016.953  | 2.169 | 1.117 | 0.000 | 0.000 |
| FBgn0000221 | 211.171   | 133.285   | 289.056   | 2.169 | 1.117 | 0.000 | 0.001 |
| FBgn0032330 | 694.535   | 438.357   | 950.713   | 2.169 | 1.117 | 0.000 | 0.000 |
| FBgn0025525 | 1099.551  | 693.690   | 1505.412  | 2.170 | 1.118 | 0.000 | 0.000 |
| FBgn0010409 | 29513.603 | 18618.819 | 40408.386 | 2.170 | 1.118 | 0.003 | 0.014 |
| FBgn0051057 | 3553.636  | 2241.221  | 4866.051  | 2.171 | 1.118 | 0.000 | 0.000 |
| FBgn0000578 | 949.851   | 598.698   | 1301.005  | 2.173 | 1.120 | 0.000 | 0.000 |
| FBgn0033351 | 760.916   | 479.531   | 1042.301  | 2.174 | 1.120 | 0.001 | 0.006 |
| FBgn0025814 | 3400.888  | 2143.005  | 4658.772  | 2.174 | 1.120 | 0.008 | 0.029 |
| FBgn0031805 | 2071.009  | 1304.381  | 2837.637  | 2.175 | 1.121 | 0.000 | 0.000 |

|             |          |          |           |       |       |       |       |
|-------------|----------|----------|-----------|-------|-------|-------|-------|
| FBgn0261458 | 5099.831 | 3211.989 | 6987.673  | 2.175 | 1.121 | 0.000 | 0.001 |
| FBgn0010774 | 2365.218 | 1489.507 | 3240.928  | 2.176 | 1.122 | 0.000 | 0.000 |
| FBgn0003117 | 154.877  | 97.534   | 212.220   | 2.176 | 1.122 | 0.000 | 0.001 |
| FBgn0041092 | 5623.456 | 3538.950 | 7707.962  | 2.178 | 1.123 | 0.000 | 0.000 |
| FBgn0000577 | 123.962  | 77.997   | 169.927   | 2.179 | 1.123 | 0.001 | 0.004 |
| FBgn0004957 | 359.509  | 226.193  | 492.826   | 2.179 | 1.124 | 0.001 | 0.003 |
| FBgn0032283 | 765.583  | 481.653  | 1049.513  | 2.179 | 1.124 | 0.002 | 0.008 |
| FBgn0053144 | 4377.526 | 2751.258 | 6003.794  | 2.182 | 1.126 | 0.000 | 0.000 |
| FBgn0031003 | 282.581  | 177.593  | 387.569   | 2.182 | 1.126 | 0.000 | 0.001 |
| FBgn0039406 | 5763.690 | 3622.276 | 7905.104  | 2.182 | 1.126 | 0.000 | 0.001 |
| FBgn0014028 | 6179.424 | 3882.981 | 8475.866  | 2.183 | 1.126 | 0.001 | 0.006 |
| FBgn0040941 | 70.382   | 44.211   | 96.552    | 2.184 | 1.127 | 0.006 | 0.023 |
| FBgn0039654 | 466.664  | 293.046  | 640.283   | 2.185 | 1.128 | 0.000 | 0.000 |
| FBgn0003175 | 4558.507 | 2862.215 | 6254.800  | 2.185 | 1.128 | 0.000 | 0.000 |
| FBgn0003339 | 270.210  | 169.643  | 370.778   | 2.186 | 1.128 | 0.000 | 0.001 |
| FBgn0003890 | 2756.686 | 1730.519 | 3782.854  | 2.186 | 1.128 | 0.000 | 0.000 |
| FBgn0010825 | 7542.473 | 4732.739 | 10352.207 | 2.187 | 1.129 | 0.000 | 0.000 |
| FBgn0039674 | 2711.940 | 1701.381 | 3722.499  | 2.188 | 1.130 | 0.000 | 0.000 |
| FBgn0085478 | 3992.104 | 2504.347 | 5479.861  | 2.188 | 1.130 | 0.003 | 0.012 |
| FBgn0259241 | 708.237  | 443.892  | 972.583   | 2.191 | 1.132 | 0.000 | 0.000 |
| FBgn0038606 | 1011.699 | 633.998  | 1389.400  | 2.191 | 1.132 | 0.000 | 0.000 |
| FBgn0031060 | 362.648  | 227.120  | 498.175   | 2.193 | 1.133 | 0.001 | 0.007 |
| FBgn0030239 | 1946.312 | 1218.167 | 2674.458  | 2.195 | 1.135 | 0.001 | 0.007 |
| FBgn0040208 | 988.596  | 618.660  | 1358.532  | 2.196 | 1.135 | 0.000 | 0.000 |
| FBgn0038868 | 1075.512 | 672.753  | 1478.270  | 2.197 | 1.136 | 0.000 | 0.000 |
| FBgn0036958 | 3271.006 | 2045.824 | 4496.188  | 2.198 | 1.136 | 0.000 | 0.000 |
| FBgn0033093 | 522.852  | 326.902  | 718.803   | 2.199 | 1.137 | 0.000 | 0.000 |
| FBgn0032295 | 889.690  | 556.162  | 1223.217  | 2.199 | 1.137 | 0.000 | 0.000 |
| FBgn0020764 | 3444.825 | 2152.725 | 4736.924  | 2.200 | 1.138 | 0.000 | 0.000 |
| FBgn0259729 | 48.322   | 30.183   | 66.462    | 2.202 | 1.139 | 0.015 | 0.047 |
| FBgn0014857 | 5216.396 | 3257.521 | 7175.270  | 2.203 | 1.139 | 0.000 | 0.000 |
| FBgn0030289 | 1252.288 | 781.979  | 1722.596  | 2.203 | 1.139 | 0.000 | 0.000 |
| FBgn0030017 | 700.571  | 437.426  | 963.715   | 2.203 | 1.140 | 0.000 | 0.000 |
| FBgn0031002 | 1043.154 | 651.262  | 1435.046  | 2.203 | 1.140 | 0.000 | 0.000 |

|             |           |           |           |       |       |       |       |
|-------------|-----------|-----------|-----------|-------|-------|-------|-------|
| FBgn0010786 | 1611.372  | 1005.864  | 2216.881  | 2.204 | 1.140 | 0.000 | 0.000 |
| FBgn0261610 | 1027.647  | 641.208   | 1414.086  | 2.205 | 1.141 | 0.000 | 0.000 |
| FBgn0030000 | 503.107   | 313.830   | 692.385   | 2.206 | 1.142 | 0.000 | 0.000 |
| FBgn0003044 | 1390.458  | 867.300   | 1913.617  | 2.206 | 1.142 | 0.000 | 0.000 |
| FBgn0011758 | 269.669   | 168.191   | 371.147   | 2.207 | 1.142 | 0.001 | 0.007 |
| FBgn0036825 | 31286.450 | 19512.584 | 43060.315 | 2.207 | 1.142 | 0.001 | 0.003 |
| FBgn0019624 | 14795.304 | 9224.593  | 20366.016 | 2.208 | 1.143 | 0.000 | 0.000 |
| FBgn0037328 | 19817.644 | 12353.783 | 27281.504 | 2.208 | 1.143 | 0.006 | 0.024 |
| FBgn0033446 | 12465.464 | 7765.846  | 17165.082 | 2.210 | 1.144 | 0.001 | 0.003 |
| FBgn0003714 | 864.800   | 538.709   | 1190.892  | 2.211 | 1.144 | 0.000 | 0.000 |
| FBgn0000529 | 192.559   | 119.934   | 265.184   | 2.211 | 1.145 | 0.000 | 0.001 |
| FBgn0027560 | 34420.355 | 21429.462 | 47411.247 | 2.212 | 1.146 | 0.000 | 0.000 |
| FBgn0034758 | 433.814   | 269.901   | 597.727   | 2.215 | 1.147 | 0.000 | 0.000 |
| FBgn0027788 | 37.037    | 23.040    | 51.035    | 2.215 | 1.147 | 0.014 | 0.045 |
| FBgn0033155 | 981.810   | 610.646   | 1352.974  | 2.216 | 1.148 | 0.000 | 0.000 |
| FBgn0052529 | 6897.566  | 4289.465  | 9505.666  | 2.216 | 1.148 | 0.000 | 0.000 |
| FBgn0261569 | 1316.630  | 818.756   | 1814.503  | 2.216 | 1.148 | 0.000 | 0.000 |
| FBgn0033919 | 4454.475  | 2768.182  | 6140.768  | 2.218 | 1.149 | 0.000 | 0.000 |
| FBgn0023519 | 824.451   | 512.237   | 1136.664  | 2.219 | 1.150 | 0.000 | 0.000 |
| FBgn0037021 | 1760.451  | 1093.244  | 2427.658  | 2.221 | 1.151 | 0.000 | 0.000 |
| FBgn0002576 | 834.208   | 518.036   | 1150.379  | 2.221 | 1.151 | 0.000 | 0.001 |
| FBgn0011272 | 34431.978 | 21379.514 | 47484.442 | 2.221 | 1.151 | 0.002 | 0.009 |
| FBgn0041188 | 6100.686  | 3787.954  | 8413.417  | 2.221 | 1.151 | 0.000 | 0.001 |
| FBgn0263934 | 614.000   | 381.219   | 846.780   | 2.221 | 1.151 | 0.000 | 0.000 |
| FBgn0000504 | 857.277   | 531.923   | 1182.631  | 2.223 | 1.153 | 0.001 | 0.007 |
| FBgn0051058 | 101.964   | 63.261    | 140.668   | 2.224 | 1.153 | 0.001 | 0.005 |
| FBgn0038422 | 795.070   | 492.893   | 1097.247  | 2.226 | 1.155 | 0.000 | 0.000 |
| FBgn0013548 | 384.584   | 238.405   | 530.764   | 2.226 | 1.155 | 0.000 | 0.000 |
| FBgn0259236 | 365.552   | 226.602   | 504.501   | 2.226 | 1.155 | 0.000 | 0.000 |
| FBgn0051849 | 242.945   | 150.530   | 335.361   | 2.228 | 1.156 | 0.001 | 0.005 |
| FBgn0052521 | 21914.299 | 13571.933 | 30256.664 | 2.229 | 1.157 | 0.000 | 0.000 |
| FBgn0039492 | 2824.858  | 1747.446  | 3902.271  | 2.233 | 1.159 | 0.000 | 0.000 |
| FBgn0002174 | 1379.368  | 853.209   | 1905.528  | 2.233 | 1.159 | 0.000 | 0.000 |
| FBgn0030787 | 388.271   | 239.760   | 536.783   | 2.239 | 1.163 | 0.000 | 0.000 |

|             |            |            |            |       |       |       |       |
|-------------|------------|------------|------------|-------|-------|-------|-------|
| FBgn0030995 | 109.722    | 67.735     | 151.708    | 2.240 | 1.163 | 0.001 | 0.003 |
| FBgn0032281 | 274.032    | 169.006    | 379.058    | 2.243 | 1.165 | 0.001 | 0.005 |
| FBgn0031855 | 415.639    | 256.163    | 575.116    | 2.245 | 1.167 | 0.000 | 0.000 |
| FBgn0031021 | 3161.327   | 1947.745   | 4374.909   | 2.246 | 1.167 | 0.001 | 0.006 |
| FBgn0031261 | 2346.871   | 1445.930   | 3247.811   | 2.246 | 1.167 | 0.000 | 0.000 |
| FBgn0030012 | 195.539    | 120.410    | 270.667    | 2.248 | 1.169 | 0.000 | 0.001 |
| FBgn0039186 | 2042.698   | 1257.820   | 2827.575   | 2.248 | 1.169 | 0.000 | 0.000 |
| FBgn0087008 | 4482.251   | 2757.368   | 6207.134   | 2.251 | 1.171 | 0.000 | 0.000 |
| FBgn0033101 | 1593.064   | 979.922    | 2206.206   | 2.251 | 1.171 | 0.000 | 0.000 |
| FBgn0030786 | 3307.168   | 2033.373   | 4580.964   | 2.253 | 1.172 | 0.003 | 0.014 |
| FBgn0052683 | 686.613    | 421.778    | 951.449    | 2.256 | 1.174 | 0.000 | 0.000 |
| FBgn0005391 | 359831.705 | 220991.385 | 498672.025 | 2.257 | 1.174 | 0.002 | 0.011 |
| FBgn0085391 | 1550.939   | 952.138    | 2149.740   | 2.258 | 1.175 | 0.000 | 0.000 |
| FBgn0020279 | 12138.498  | 7442.738   | 16834.257  | 2.262 | 1.177 | 0.000 | 0.000 |
| FBgn0037222 | 56.165     | 34.430     | 77.900     | 2.263 | 1.178 | 0.003 | 0.013 |
| FBgn0037715 | 3583.115   | 2195.486   | 4970.745   | 2.264 | 1.179 | 0.001 | 0.003 |
| FBgn0034720 | 5969.098   | 3656.644   | 8281.552   | 2.265 | 1.179 | 0.000 | 0.000 |
| FBgn0035251 | 2254.786   | 1380.818   | 3128.754   | 2.266 | 1.180 | 0.000 | 0.000 |
| FBgn0261592 | 47715.274  | 29219.535  | 66211.014  | 2.266 | 1.180 | 0.000 | 0.000 |
| FBgn0010877 | 1941.556   | 1188.805   | 2694.308   | 2.266 | 1.180 | 0.000 | 0.000 |
| FBgn0030605 | 3109.492   | 1903.568   | 4315.416   | 2.267 | 1.181 | 0.001 | 0.006 |
| FBgn0050410 | 1967.767   | 1204.517   | 2731.017   | 2.267 | 1.181 | 0.000 | 0.000 |
| FBgn0031811 | 229.255    | 140.264    | 318.246    | 2.269 | 1.182 | 0.000 | 0.001 |
| FBgn0261963 | 211.548    | 129.422    | 293.674    | 2.269 | 1.182 | 0.000 | 0.000 |
| FBgn0041210 | 4139.116   | 2531.523   | 5746.709   | 2.270 | 1.183 | 0.000 | 0.000 |
| FBgn0035534 | 915.080    | 559.490    | 1270.670   | 2.271 | 1.183 | 0.000 | 0.000 |
| FBgn0001169 | 1502.356   | 917.921    | 2086.791   | 2.273 | 1.185 | 0.000 | 0.001 |
| FBgn0035035 | 372.893    | 227.756    | 518.030    | 2.274 | 1.186 | 0.000 | 0.000 |
| FBgn0000017 | 5893.732   | 3596.539   | 8190.925   | 2.277 | 1.187 | 0.000 | 0.000 |
| FBgn0030034 | 1152.413   | 702.608    | 1602.217   | 2.280 | 1.189 | 0.000 | 0.000 |
| FBgn0035625 | 3617.945   | 2205.504   | 5030.387   | 2.281 | 1.190 | 0.000 | 0.002 |
| FBgn0031602 | 1405.533   | 856.079    | 1954.987   | 2.284 | 1.191 | 0.000 | 0.000 |
| FBgn0024556 | 2871.328   | 1748.440   | 3994.216   | 2.284 | 1.192 | 0.000 | 0.000 |
| FBgn0027794 | 1092.653   | 664.680    | 1520.626   | 2.288 | 1.194 | 0.000 | 0.000 |

|             |           |           |           |       |       |       |       |
|-------------|-----------|-----------|-----------|-------|-------|-------|-------|
| FBgn0004606 | 1612.653  | 979.902   | 2245.405  | 2.291 | 1.196 | 0.000 | 0.000 |
| FBgn0003512 | 664.021   | 403.157   | 924.886   | 2.294 | 1.198 | 0.000 | 0.000 |
| FBgn0260971 | 760.794   | 461.788   | 1059.799  | 2.295 | 1.198 | 0.000 | 0.000 |
| FBgn0031450 | 3064.502  | 1859.828  | 4269.175  | 2.295 | 1.199 | 0.000 | 0.000 |
| FBgn0026428 | 10084.912 | 6119.590  | 14050.233 | 2.296 | 1.199 | 0.000 | 0.000 |
| FBgn0030877 | 338.491   | 205.301   | 471.682   | 2.298 | 1.200 | 0.000 | 0.000 |
| FBgn0025382 | 551.495   | 334.477   | 768.514   | 2.298 | 1.200 | 0.000 | 0.000 |
| FBgn0040609 | 2609.373  | 1582.557  | 3636.190  | 2.298 | 1.200 | 0.010 | 0.036 |
| FBgn0037135 | 10422.470 | 6320.664  | 14524.275 | 2.298 | 1.200 | 0.000 | 0.000 |
| FBgn0020545 | 3405.617  | 2062.112  | 4749.121  | 2.303 | 1.204 | 0.000 | 0.000 |
| FBgn0013725 | 1107.128  | 670.344   | 1543.912  | 2.303 | 1.204 | 0.000 | 0.000 |
| FBgn0031377 | 1802.759  | 1091.215  | 2514.303  | 2.304 | 1.204 | 0.000 | 0.000 |
| FBgn0261710 | 11544.370 | 6977.091  | 16111.648 | 2.309 | 1.207 | 0.000 | 0.000 |
| FBgn0017566 | 11046.608 | 6676.231  | 15416.986 | 2.309 | 1.207 | 0.000 | 0.000 |
| FBgn0003330 | 664.748   | 401.221   | 928.275   | 2.314 | 1.210 | 0.000 | 0.000 |
| FBgn0030968 | 1851.642  | 1117.185  | 2586.099  | 2.315 | 1.211 | 0.010 | 0.035 |
| FBgn0263997 | 2028.520  | 1222.107  | 2834.933  | 2.320 | 1.214 | 0.000 | 0.000 |
| FBgn0020389 | 1761.444  | 1059.991  | 2462.898  | 2.324 | 1.216 | 0.000 | 0.000 |
| FBgn0003053 | 1208.956  | 726.504   | 1691.408  | 2.328 | 1.219 | 0.000 | 0.001 |
| FBgn0004655 | 2692.944  | 1618.155  | 3767.734  | 2.328 | 1.219 | 0.000 | 0.000 |
| FBgn0040382 | 29197.907 | 17533.352 | 40862.461 | 2.331 | 1.221 | 0.000 | 0.000 |
| FBgn0028862 | 1530.426  | 918.248   | 2142.603  | 2.333 | 1.222 | 0.000 | 0.000 |
| FBgn0025833 | 1728.779  | 1036.626  | 2420.932  | 2.335 | 1.224 | 0.000 | 0.000 |
| FBgn0261572 | 444.770   | 266.656   | 622.885   | 2.336 | 1.224 | 0.000 | 0.000 |
| FBgn0032694 | 1198.674  | 718.591   | 1678.758  | 2.336 | 1.224 | 0.000 | 0.000 |
| FBgn0030243 | 2328.919  | 1393.563  | 3264.275  | 2.342 | 1.228 | 0.000 | 0.000 |
| FBgn0039451 | 2217.204  | 1326.386  | 3108.022  | 2.343 | 1.228 | 0.000 | 0.000 |
| FBgn0034650 | 499.217   | 298.517   | 699.917   | 2.345 | 1.229 | 0.001 | 0.003 |
| FBgn0015919 | 372.071   | 222.478   | 521.665   | 2.345 | 1.229 | 0.000 | 0.000 |
| FBgn0031418 | 2720.139  | 1626.303  | 3813.975  | 2.345 | 1.230 | 0.000 | 0.000 |
| FBgn0250870 | 161.163   | 96.343    | 225.983   | 2.346 | 1.230 | 0.000 | 0.001 |
| FBgn0015381 | 44.311    | 26.483    | 62.139    | 2.346 | 1.230 | 0.010 | 0.035 |
| FBgn0031053 | 281.211   | 168.068   | 394.353   | 2.346 | 1.230 | 0.000 | 0.000 |
| FBgn0030482 | 4440.584  | 2651.471  | 6229.697  | 2.350 | 1.232 | 0.000 | 0.000 |



|             |           |           |           |       |       |       |       |
|-------------|-----------|-----------|-----------|-------|-------|-------|-------|
| FBgn0033367 | 7036.706  | 4198.969  | 9874.443  | 2.352 | 1.234 | 0.002 | 0.008 |
| FBgn0243516 | 2696.949  | 1609.236  | 3784.662  | 2.352 | 1.234 | 0.000 | 0.000 |
| FBgn0003887 | 13396.420 | 7992.102  | 18800.737 | 2.352 | 1.234 | 0.000 | 0.001 |
| FBgn0028991 | 2916.438  | 1739.783  | 4093.093  | 2.353 | 1.234 | 0.000 | 0.000 |
| FBgn0024998 | 423.665   | 252.724   | 594.607   | 2.353 | 1.234 | 0.000 | 0.000 |
| FBgn0036919 | 1661.256  | 990.771   | 2331.741  | 2.353 | 1.235 | 0.000 | 0.000 |
| FBgn0025634 | 680.126   | 405.215   | 955.036   | 2.357 | 1.237 | 0.000 | 0.000 |
| FBgn0011746 | 707.299   | 421.168   | 993.430   | 2.359 | 1.238 | 0.000 | 0.000 |
| FBgn0051632 | 240.131   | 142.899   | 337.362   | 2.361 | 1.239 | 0.002 | 0.009 |
| FBgn0003279 | 45518.834 | 27078.364 | 63959.304 | 2.362 | 1.240 | 0.001 | 0.003 |
| FBgn0034911 | 1376.983  | 817.610   | 1936.355  | 2.368 | 1.244 | 0.000 | 0.000 |
| FBgn0261602 | 34514.789 | 20489.676 | 48539.901 | 2.369 | 1.244 | 0.000 | 0.000 |
| FBgn0033566 | 712.578   | 422.985   | 1002.171  | 2.369 | 1.244 | 0.000 | 0.000 |
| FBgn0033987 | 3091.234  | 1834.517  | 4347.951  | 2.370 | 1.245 | 0.000 | 0.000 |
| FBgn0003062 | 2390.497  | 1416.518  | 3364.475  | 2.375 | 1.248 | 0.000 | 0.000 |
| FBgn0261811 | 1742.857  | 1032.104  | 2453.610  | 2.377 | 1.249 | 0.001 | 0.005 |
| FBgn0029791 | 1397.369  | 827.311   | 1967.428  | 2.378 | 1.250 | 0.000 | 0.002 |
| FBgn0001332 | 1210.103  | 715.509   | 1704.696  | 2.382 | 1.252 | 0.000 | 0.000 |
| FBgn0031093 | 913.582   | 540.127   | 1287.037  | 2.383 | 1.253 | 0.000 | 0.000 |
| FBgn0027497 | 1224.749  | 723.880   | 1725.618  | 2.384 | 1.253 | 0.000 | 0.000 |
| FBgn0038267 | 99.630    | 58.854    | 140.405   | 2.386 | 1.254 | 0.000 | 0.001 |
| FBgn0000625 | 139.783   | 82.504    | 197.061   | 2.388 | 1.256 | 0.000 | 0.001 |
| FBgn0263072 | 5879.259  | 3469.355  | 8289.163  | 2.389 | 1.257 | 0.000 | 0.000 |
| FBgn0051144 | 92.717    | 54.603    | 130.830   | 2.396 | 1.261 | 0.002 | 0.011 |
| FBgn0005771 | 1706.644  | 1003.850  | 2409.439  | 2.400 | 1.263 | 0.000 | 0.000 |
| FBgn0040398 | 22556.490 | 13262.676 | 31850.304 | 2.401 | 1.264 | 0.001 | 0.003 |
| FBgn0034817 | 432.121   | 253.923   | 610.319   | 2.404 | 1.265 | 0.000 | 0.000 |
| FBgn0003189 | 720.164   | 423.115   | 1017.213  | 2.404 | 1.265 | 0.000 | 0.000 |
| FBgn0001320 | 480.984   | 282.263   | 679.705   | 2.408 | 1.268 | 0.001 | 0.005 |
| FBgn0037329 | 1134.013  | 665.231   | 1602.794  | 2.409 | 1.269 | 0.000 | 0.000 |
| FBgn0039538 | 105.100   | 61.653    | 148.547   | 2.409 | 1.269 | 0.004 | 0.015 |
| FBgn0003651 | 3668.473  | 2149.981  | 5186.965  | 2.413 | 1.271 | 0.000 | 0.000 |
| FBgn0032656 | 1254.008  | 734.816   | 1773.201  | 2.413 | 1.271 | 0.000 | 0.000 |
| FBgn0037448 | 1284.026  | 751.825   | 1816.226  | 2.416 | 1.272 | 0.000 | 0.000 |

|             |           |           |           |       |       |       |       |
|-------------|-----------|-----------|-----------|-------|-------|-------|-------|
| FBgn0028906 | 492.575   | 288.024   | 697.126   | 2.420 | 1.275 | 0.000 | 0.001 |
| FBgn0033879 | 10001.095 | 5846.434  | 14155.756 | 2.421 | 1.276 | 0.000 | 0.001 |
| FBgn0050418 | 473.439   | 276.508   | 670.370   | 2.424 | 1.278 | 0.000 | 0.000 |
| FBgn0001168 | 1562.029  | 912.196   | 2211.862  | 2.425 | 1.278 | 0.000 | 0.000 |
| FBgn0264443 | 424.380   | 247.744   | 601.015   | 2.426 | 1.279 | 0.000 | 0.000 |
| FBgn0020910 | 36417.886 | 21257.490 | 51578.282 | 2.426 | 1.279 | 0.000 | 0.000 |
| FBgn0261801 | 70.663    | 41.219    | 100.108   | 2.429 | 1.280 | 0.001 | 0.004 |
| FBgn0005638 | 38.230    | 22.299    | 54.161    | 2.429 | 1.280 | 0.005 | 0.018 |
| FBgn0031312 | 492.876   | 287.191   | 698.562   | 2.432 | 1.282 | 0.000 | 0.000 |
| FBgn0005636 | 437.367   | 254.831   | 619.903   | 2.433 | 1.283 | 0.000 | 0.000 |
| FBgn0001297 | 5723.827  | 3334.339  | 8113.316  | 2.433 | 1.283 | 0.000 | 0.000 |
| FBgn0039635 | 6048.900  | 3522.864  | 8574.936  | 2.434 | 1.283 | 0.000 | 0.000 |
| FBgn0033321 | 687.311   | 400.176   | 974.446   | 2.435 | 1.284 | 0.000 | 0.001 |
| FBgn0035993 | 904.769   | 526.388   | 1283.149  | 2.438 | 1.285 | 0.000 | 0.000 |
| FBgn0010222 | 7241.166  | 4210.250  | 10272.081 | 2.440 | 1.287 | 0.000 | 0.002 |
| FBgn0002941 | 240.465   | 139.747   | 341.184   | 2.441 | 1.288 | 0.000 | 0.000 |
| FBgn0026409 | 18194.231 | 10570.908 | 25817.553 | 2.442 | 1.288 | 0.000 | 0.000 |
| FBgn0002031 | 2673.986  | 1551.355  | 3796.617  | 2.447 | 1.291 | 0.000 | 0.000 |
| FBgn0038347 | 2579.618  | 1493.732  | 3665.504  | 2.454 | 1.295 | 0.000 | 0.000 |
| FBgn0028420 | 4333.845  | 2505.811  | 6161.879  | 2.459 | 1.298 | 0.000 | 0.000 |
| FBgn0011701 | 2089.995  | 1208.277  | 2971.714  | 2.459 | 1.298 | 0.000 | 0.000 |
| FBgn0011655 | 1658.639  | 958.518   | 2358.759  | 2.461 | 1.299 | 0.000 | 0.000 |
| FBgn0036373 | 1027.706  | 593.364   | 1462.049  | 2.464 | 1.301 | 0.000 | 0.000 |
| FBgn0030060 | 1732.933  | 1000.005  | 2465.860  | 2.466 | 1.302 | 0.000 | 0.000 |
| FBgn0041184 | 1106.892  | 638.219   | 1575.565  | 2.469 | 1.304 | 0.000 | 0.000 |
| FBgn0051191 | 632.752   | 364.771   | 900.734   | 2.469 | 1.304 | 0.000 | 0.000 |
| FBgn0051855 | 527.899   | 304.271   | 751.526   | 2.470 | 1.304 | 0.000 | 0.000 |
| FBgn0015288 | 7188.308  | 4138.588  | 10238.028 | 2.474 | 1.307 | 0.001 | 0.004 |
| FBgn0000042 | 25972.989 | 14950.018 | 36995.961 | 2.475 | 1.307 | 0.000 | 0.002 |
| FBgn0002945 | 1043.181  | 600.444   | 1485.917  | 2.475 | 1.307 | 0.000 | 0.001 |
| FBgn0027334 | 1187.605  | 682.480   | 1692.730  | 2.480 | 1.310 | 0.000 | 0.000 |
| FBgn0000180 | 297.497   | 170.860   | 424.134   | 2.482 | 1.312 | 0.000 | 0.000 |
| FBgn0250814 | 13107.325 | 7520.966  | 18693.684 | 2.486 | 1.314 | 0.000 | 0.000 |
| FBgn0038948 | 810.701   | 465.078   | 1156.323  | 2.486 | 1.314 | 0.000 | 0.000 |

|             |            |            |            |       |       |       |       |
|-------------|------------|------------|------------|-------|-------|-------|-------|
| FBgn0029824 | 1098.040   | 629.767    | 1566.314   | 2.487 | 1.314 | 0.000 | 0.000 |
| FBgn0085404 | 22.444     | 12.871     | 32.017     | 2.487 | 1.315 | 0.015 | 0.049 |
| FBgn0037906 | 827.197    | 473.732    | 1180.662   | 2.492 | 1.317 | 0.000 | 0.000 |
| FBgn0033140 | 50.241     | 28.768     | 71.714     | 2.493 | 1.318 | 0.002 | 0.010 |
| FBgn0053098 | 33.463     | 19.147     | 47.779     | 2.495 | 1.319 | 0.005 | 0.019 |
| FBgn0032285 | 39488.123  | 22575.049  | 56401.196  | 2.498 | 1.321 | 0.000 | 0.002 |
| FBgn0014455 | 2169.092   | 1237.763   | 3100.420   | 2.505 | 1.325 | 0.000 | 0.000 |
| FBgn0030292 | 5082.113   | 2898.549   | 7265.676   | 2.507 | 1.326 | 0.004 | 0.016 |
| FBgn0016075 | 6991.453   | 3977.257   | 10005.649  | 2.516 | 1.331 | 0.000 | 0.000 |
| FBgn0002522 | 116.497    | 66.190     | 166.804    | 2.520 | 1.333 | 0.000 | 0.000 |
| FBgn0086680 | 2949.898   | 1675.054   | 4224.741   | 2.522 | 1.335 | 0.000 | 0.000 |
| FBgn0037171 | 277.570    | 157.408    | 397.733    | 2.527 | 1.337 | 0.004 | 0.015 |
| FBgn0029799 | 899.270    | 509.669    | 1288.871   | 2.529 | 1.338 | 0.000 | 0.000 |
| FBgn0000053 | 2895.916   | 1636.111   | 4155.721   | 2.540 | 1.345 | 0.000 | 0.000 |
| FBgn0030093 | 1093.563   | 617.216    | 1569.909   | 2.544 | 1.347 | 0.000 | 0.000 |
| FBgn0262317 | 31.276     | 17.635     | 44.917     | 2.547 | 1.349 | 0.010 | 0.035 |
| FBgn0040234 | 1584.719   | 892.310    | 2277.127   | 2.552 | 1.352 | 0.000 | 0.000 |
| FBgn0015904 | 194.691    | 109.598    | 279.784    | 2.553 | 1.352 | 0.000 | 0.000 |
| FBgn0015766 | 37602.980  | 21155.937  | 54050.022  | 2.555 | 1.353 | 0.000 | 0.000 |
| FBgn0086358 | 3057.538   | 1719.575   | 4395.501   | 2.556 | 1.354 | 0.000 | 0.000 |
| FBgn0035267 | 1695.356   | 952.902    | 2437.811   | 2.558 | 1.355 | 0.000 | 0.000 |
| FBgn0259938 | 2019.113   | 1134.034   | 2904.193   | 2.561 | 1.357 | 0.000 | 0.000 |
| FBgn0029176 | 29380.502  | 16448.903  | 42312.102  | 2.572 | 1.363 | 0.000 | 0.000 |
| FBgn0000299 | 10531.864  | 5893.115   | 15170.613  | 2.574 | 1.364 | 0.000 | 0.000 |
| FBgn0045862 | 2393.962   | 1338.252   | 3449.672   | 2.578 | 1.366 | 0.000 | 0.000 |
| FBgn0004618 | 1953.643   | 1091.409   | 2815.877   | 2.580 | 1.367 | 0.000 | 0.000 |
| FBgn0003090 | 726.320    | 405.442    | 1047.199   | 2.583 | 1.369 | 0.000 | 0.000 |
| FBgn0029823 | 4737.680   | 2641.816   | 6833.543   | 2.587 | 1.371 | 0.000 | 0.000 |
| FBgn0263239 | 256.720    | 143.097    | 370.342    | 2.588 | 1.372 | 0.000 | 0.000 |
| FBgn0032803 | 386.851    | 215.592    | 558.110    | 2.589 | 1.372 | 0.000 | 0.000 |
| FBgn0004047 | 514492.548 | 286512.920 | 742472.177 | 2.591 | 1.374 | 0.016 | 0.050 |
| FBgn0086472 | 99365.886  | 55282.210  | 143449.561 | 2.595 | 1.376 | 0.000 | 0.000 |
| FBgn0032350 | 9122.072   | 5060.204   | 13183.939  | 2.605 | 1.382 | 0.000 | 0.000 |
| FBgn0030073 | 200.976    | 111.336    | 290.616    | 2.610 | 1.384 | 0.000 | 0.000 |

|             |           |           |           |       |       |       |       |
|-------------|-----------|-----------|-----------|-------|-------|-------|-------|
| FBgn0263512 | 309.546   | 171.415   | 447.677   | 2.612 | 1.385 | 0.000 | 0.000 |
| FBgn0004197 | 62.151    | 34.400    | 89.901    | 2.613 | 1.386 | 0.001 | 0.004 |
| FBgn0000411 | 452.953   | 250.666   | 655.240   | 2.614 | 1.386 | 0.000 | 0.000 |
| FBgn0263392 | 9199.136  | 5090.582  | 13307.689 | 2.614 | 1.386 | 0.000 | 0.000 |
| FBgn0050269 | 679.142   | 375.684   | 982.600   | 2.615 | 1.387 | 0.000 | 0.000 |
| FBgn0040391 | 39.304    | 21.722    | 56.887    | 2.619 | 1.389 | 0.003 | 0.012 |
| FBgn0008646 | 114.403   | 63.164    | 165.641   | 2.622 | 1.391 | 0.000 | 0.000 |
| FBgn0052537 | 281.474   | 155.168   | 407.781   | 2.628 | 1.394 | 0.000 | 0.000 |
| FBgn0020307 | 840.820   | 462.495   | 1219.146  | 2.636 | 1.398 | 0.010 | 0.035 |
| FBgn0030160 | 20721.831 | 11394.469 | 30049.193 | 2.637 | 1.399 | 0.000 | 0.000 |
| FBgn0013676 | 5797.335  | 3185.268  | 8409.403  | 2.640 | 1.401 | 0.000 | 0.000 |
| FBgn0005612 | 1499.454  | 823.130   | 2175.779  | 2.643 | 1.402 | 0.000 | 0.001 |
| FBgn0004854 | 230.877   | 126.716   | 335.038   | 2.644 | 1.403 | 0.000 | 0.000 |
| FBgn0029639 | 7304.665  | 3996.162  | 10613.168 | 2.656 | 1.409 | 0.012 | 0.040 |
| FBgn0050411 | 39.192    | 21.432    | 56.953    | 2.657 | 1.410 | 0.002 | 0.010 |
| FBgn0029858 | 230.956   | 126.109   | 335.802   | 2.663 | 1.413 | 0.000 | 0.000 |
| FBgn0045823 | 25655.239 | 13990.206 | 37320.273 | 2.668 | 1.416 | 0.005 | 0.020 |
| FBgn0031100 | 151.949   | 82.601    | 221.296   | 2.679 | 1.422 | 0.000 | 0.000 |
| FBgn0023549 | 1377.742  | 748.341   | 2007.143  | 2.682 | 1.423 | 0.000 | 0.000 |
| FBgn0039184 | 44.631    | 24.231    | 65.031    | 2.684 | 1.424 | 0.007 | 0.027 |
| FBgn0050127 | 2557.287  | 1386.963  | 3727.611  | 2.688 | 1.426 | 0.000 | 0.000 |
| FBgn0034157 | 30.380    | 16.474    | 44.286    | 2.688 | 1.427 | 0.005 | 0.019 |
| FBgn0052484 | 1758.607  | 953.237   | 2563.977  | 2.690 | 1.427 | 0.000 | 0.000 |
| FBgn0037999 | 541.253   | 293.053   | 789.454   | 2.694 | 1.430 | 0.000 | 0.000 |
| FBgn0041337 | 120.124   | 65.029    | 175.220   | 2.694 | 1.430 | 0.000 | 0.002 |
| FBgn0030661 | 66.695    | 36.105    | 97.285    | 2.695 | 1.430 | 0.001 | 0.004 |
| FBgn0042650 | 1937.043  | 1047.380  | 2826.707  | 2.699 | 1.432 | 0.000 | 0.000 |
| FBgn0016120 | 11905.636 | 6437.021  | 17374.251 | 2.699 | 1.432 | 0.000 | 0.000 |
| FBgn0259172 | 774.298   | 418.544   | 1130.051  | 2.700 | 1.433 | 0.000 | 0.000 |
| FBgn0030391 | 529.151   | 284.872   | 773.431   | 2.715 | 1.441 | 0.000 | 0.000 |
| FBgn0020912 | 133.737   | 71.948    | 195.527   | 2.718 | 1.442 | 0.000 | 0.000 |
| FBgn0029864 | 2113.649  | 1133.599  | 3093.699  | 2.729 | 1.448 | 0.000 | 0.000 |
| FBgn0021906 | 12536.729 | 6716.831  | 18356.628 | 2.733 | 1.450 | 0.000 | 0.000 |
| FBgn0000413 | 2783.189  | 1490.444  | 4075.934  | 2.735 | 1.451 | 0.000 | 0.000 |

|             |           |          |           |       |       |       |       |
|-------------|-----------|----------|-----------|-------|-------|-------|-------|
| FBgn0020385 | 6801.416  | 3638.728 | 9964.105  | 2.738 | 1.453 | 0.000 | 0.000 |
| FBgn0000157 | 597.785   | 319.562  | 876.008   | 2.741 | 1.455 | 0.000 | 0.000 |
| FBgn0032812 | 787.883   | 420.707  | 1155.060  | 2.746 | 1.457 | 0.000 | 0.000 |
| FBgn0011824 | 1293.986  | 690.907  | 1897.065  | 2.746 | 1.457 | 0.000 | 0.002 |
| FBgn0015621 | 181.484   | 96.890   | 266.078   | 2.746 | 1.457 | 0.000 | 0.000 |
| FBgn0263330 | 339.373   | 181.170  | 497.576   | 2.746 | 1.458 | 0.002 | 0.009 |
| FBgn0261885 | 11379.057 | 6066.645 | 16691.469 | 2.751 | 1.460 | 0.000 | 0.000 |
| FBgn0033341 | 1349.039  | 719.224  | 1978.853  | 2.751 | 1.460 | 0.000 | 0.000 |
| FBgn0024366 | 47.029    | 25.035   | 69.023    | 2.757 | 1.463 | 0.000 | 0.002 |
| FBgn0262599 | 84.800    | 44.922   | 124.678   | 2.775 | 1.473 | 0.000 | 0.000 |
| FBgn0039805 | 140.631   | 74.331   | 206.930   | 2.784 | 1.477 | 0.012 | 0.042 |
| FBgn0036541 | 71.041    | 37.549   | 104.532   | 2.784 | 1.477 | 0.000 | 0.001 |
| FBgn0036584 | 46.834    | 24.711   | 68.957    | 2.791 | 1.481 | 0.001 | 0.005 |
| FBgn0031473 | 539.324   | 284.396  | 794.252   | 2.793 | 1.482 | 0.000 | 0.000 |
| FBgn0039678 | 2515.720  | 1323.122 | 3708.317  | 2.803 | 1.487 | 0.000 | 0.001 |
| FBgn0031375 | 813.798   | 427.879  | 1199.716  | 2.804 | 1.487 | 0.000 | 0.002 |
| FBgn0039827 | 463.172   | 243.303  | 683.040   | 2.807 | 1.489 | 0.000 | 0.000 |
| FBgn0032293 | 1161.268  | 608.945  | 1713.590  | 2.814 | 1.493 | 0.000 | 0.000 |
| FBgn0037167 | 927.737   | 484.943  | 1370.531  | 2.826 | 1.499 | 0.000 | 0.001 |
| FBgn0085369 | 648.691   | 338.965  | 958.416   | 2.827 | 1.500 | 0.000 | 0.000 |
| FBgn0030927 | 256.766   | 134.149  | 379.384   | 2.828 | 1.500 | 0.000 | 0.001 |
| FBgn0000964 | 670.809   | 349.648  | 991.970   | 2.837 | 1.504 | 0.000 | 0.000 |
| FBgn0261379 | 585.568   | 303.728  | 867.407   | 2.856 | 1.514 | 0.000 | 0.001 |
| FBgn0040907 | 226.307   | 117.317  | 335.297   | 2.858 | 1.515 | 0.000 | 0.002 |
| FBgn0039733 | 1467.274  | 760.357  | 2174.191  | 2.859 | 1.516 | 0.000 | 0.001 |
| FBgn0027363 | 3764.567  | 1934.738 | 5594.396  | 2.892 | 1.532 | 0.000 | 0.000 |
| FBgn0027343 | 196.347   | 100.813  | 291.880   | 2.895 | 1.534 | 0.000 | 0.000 |
| FBgn0003300 | 88.585    | 45.276   | 131.894   | 2.913 | 1.543 | 0.000 | 0.000 |
| FBgn0032191 | 3730.096  | 1904.147 | 5556.044  | 2.918 | 1.545 | 0.000 | 0.000 |
| FBgn0042701 | 223.058   | 113.815  | 332.300   | 2.920 | 1.546 | 0.002 | 0.009 |
| FBgn0034879 | 504.778   | 257.533  | 752.022   | 2.920 | 1.546 | 0.000 | 0.000 |
| FBgn0030186 | 273.259   | 139.270  | 407.248   | 2.924 | 1.548 | 0.000 | 0.000 |
| FBgn0029939 | 963.013   | 490.746  | 1435.281  | 2.925 | 1.548 | 0.000 | 0.000 |
| FBgn0020617 | 217.280   | 110.565  | 323.994   | 2.930 | 1.551 | 0.000 | 0.000 |

|             |           |           |           |       |       |       |       |
|-------------|-----------|-----------|-----------|-------|-------|-------|-------|
| FBgn0262559 | 15363.652 | 7810.437  | 22916.867 | 2.934 | 1.553 | 0.001 | 0.004 |
| FBgn0085195 | 3458.232  | 1752.928  | 5163.535  | 2.946 | 1.559 | 0.000 | 0.000 |
| FBgn0026372 | 35697.890 | 18091.278 | 53304.502 | 2.946 | 1.559 | 0.008 | 0.031 |
| FBgn0020653 | 7498.742  | 3764.768  | 11232.715 | 2.984 | 1.577 | 0.000 | 0.000 |
| FBgn0033850 | 28.688    | 14.352    | 43.023    | 2.998 | 1.584 | 0.002 | 0.008 |
| FBgn0039031 | 14466.392 | 7182.118  | 21750.665 | 3.028 | 1.599 | 0.003 | 0.015 |
| FBgn0003068 | 2457.964  | 1218.151  | 3697.777  | 3.036 | 1.602 | 0.000 | 0.000 |
| FBgn0030266 | 4712.000  | 2317.447  | 7106.553  | 3.067 | 1.617 | 0.000 | 0.000 |
| FBgn0037519 | 33.310    | 16.314    | 50.305    | 3.084 | 1.625 | 0.001 | 0.006 |
| FBgn0034501 | 9000.314  | 4399.654  | 13600.975 | 3.091 | 1.628 | 0.000 | 0.000 |
| FBgn0031107 | 7541.412  | 3685.533  | 11397.291 | 3.092 | 1.629 | 0.000 | 0.000 |
| FBgn0031918 | 18.189    | 8.881     | 27.497    | 3.096 | 1.631 | 0.014 | 0.046 |
| FBgn0023130 | 710.016   | 343.886   | 1076.146  | 3.129 | 1.646 | 0.000 | 0.000 |
| FBgn0039686 | 51.421    | 24.841    | 78.001    | 3.140 | 1.651 | 0.000 | 0.000 |
| FBgn0037310 | 21.719    | 10.489    | 32.948    | 3.141 | 1.651 | 0.010 | 0.034 |
| FBgn0264005 | 319.282   | 153.712   | 484.851   | 3.154 | 1.657 | 0.000 | 0.000 |
| FBgn0030737 | 495.594   | 238.569   | 752.619   | 3.155 | 1.658 | 0.000 | 0.000 |
| FBgn0039683 | 91.613    | 44.021    | 139.205   | 3.162 | 1.661 | 0.001 | 0.003 |
| FBgn0004654 | 4103.312  | 1970.603  | 6236.021  | 3.165 | 1.662 | 0.000 | 0.000 |
| FBgn0052085 | 1891.591  | 907.350   | 2875.832  | 3.169 | 1.664 | 0.000 | 0.000 |
| FBgn0052817 | 17.648    | 8.464     | 26.831    | 3.170 | 1.664 | 0.005 | 0.019 |
| FBgn0034996 | 17.153    | 8.174     | 26.133    | 3.197 | 1.677 | 0.009 | 0.033 |
| FBgn0034731 | 1154.166  | 549.477   | 1758.855  | 3.201 | 1.679 | 0.000 | 0.000 |
| FBgn0030120 | 46.808    | 22.202    | 71.414    | 3.216 | 1.685 | 0.000 | 0.002 |
| FBgn0038595 | 16.874    | 7.980     | 25.767    | 3.229 | 1.691 | 0.011 | 0.039 |
| FBgn0003002 | 232.675   | 108.406   | 356.943   | 3.293 | 1.719 | 0.000 | 0.000 |
| FBgn0031730 | 59.275    | 27.350    | 91.199    | 3.335 | 1.737 | 0.000 | 0.001 |
| FBgn0000078 | 199.625   | 91.903    | 307.348   | 3.344 | 1.742 | 0.000 | 0.000 |
| FBgn0040341 | 26.993    | 12.261    | 41.725    | 3.403 | 1.767 | 0.001 | 0.006 |
| FBgn0000576 | 116.465   | 52.031    | 180.898   | 3.477 | 1.798 | 0.000 | 0.002 |
| FBgn0030539 | 63.761    | 28.478    | 99.044    | 3.478 | 1.798 | 0.000 | 0.000 |
| FBgn0000071 | 30.793    | 13.709    | 47.877    | 3.492 | 1.804 | 0.001 | 0.006 |
| FBgn0052603 | 260.613   | 114.463   | 406.764   | 3.554 | 1.829 | 0.001 | 0.005 |
| FBgn0010323 | 58.820    | 25.679    | 91.960    | 3.581 | 1.840 | 0.000 | 0.001 |

|             |          |          |          |        |         |       |       |
|-------------|----------|----------|----------|--------|---------|-------|-------|
| FBgn0263511 | 374.872  | 162.567  | 587.177  | 3.612  | 1.853   | 0.000 | 0.000 |
| FBgn0035544 | 2654.299 | 1063.489 | 4245.109 | 3.992  | 1.997   | 0.001 | 0.006 |
| FBgn0035856 | 32.255   | 12.774   | 51.736   | 4.050  | 2.018   | 0.000 | 0.002 |
| FBgn0030935 | 90.606   | 35.751   | 145.461  | 4.069  | 2.025   | 0.000 | 0.000 |
| FBgn0040345 | 17.590   | 6.886    | 28.293   | 4.109  | 2.039   | 0.006 | 0.024 |
| FBgn0040349 | 58.620   | 22.686   | 94.553   | 4.168  | 2.059   | 0.000 | 0.001 |
| FBgn0000492 | 553.794  | 212.283  | 895.305  | 4.218  | 2.076   | 0.000 | 0.001 |
| FBgn0035513 | 22.268   | 8.431    | 36.106   | 4.283  | 2.099   | 0.012 | 0.040 |
| FBgn0031085 | 24.154   | 9.075    | 39.233   | 4.323  | 2.112   | 0.000 | 0.002 |
| FBgn0035189 | 1267.081 | 475.273  | 2058.890 | 4.332  | 2.115   | 0.000 | 0.000 |
| FBgn0030187 | 25.132   | 9.171    | 41.093   | 4.481  | 2.164   | 0.000 | 0.002 |
| FBgn0085196 | 13.730   | 4.087    | 23.373   | 5.719  | 2.516   | 0.004 | 0.018 |
| FBgn0038646 | 9.528    | 2.799    | 16.258   | 5.808  | 2.538   | 0.014 | 0.046 |
| FBgn0053542 | 8.179    | 1.995    | 14.363   | 7.199  | 2.848   | 0.009 | 0.031 |
| FBgn0040359 | 4.173    | 0.998    | 7.349    | 7.367  | 2.881   | 0.006 | 0.024 |
| FBgn0000357 | 26.398   | 6.082    | 46.714   | 7.681  | 2.941   | 0.000 | 0.000 |
| FBgn0029907 | 13.649   | 2.993    | 24.305   | 8.122  | 3.022   | 0.000 | 0.003 |
| FBgn0036607 | 26.011   | 5.244    | 46.778   | 8.919  | 3.157   | 0.000 | 0.000 |
| FBgn0035552 | 8.883    | 1.641    | 16.125   | 9.824  | 3.296   | 0.005 | 0.021 |
| FBgn0052793 | 8.522    | 1.351    | 15.693   | 11.614 | 3.538   | 0.003 | 0.013 |
| FBgn0031001 | 3.600    | 0.450    | 6.749    | 14.985 | 3.905   | 0.015 | 0.048 |
| FBgn0002652 | 12.951   | 25.902   | 0.000    | 0.000  | #DIV/0! | 0.000 | 0.000 |
| FBgn0003015 | 23.522   | 47.044   | 0.000    | 0.000  | #DIV/0! | 0.000 | 0.000 |
| FBgn0003114 | 8.801    | 17.602   | 0.000    | 0.000  | #DIV/0! | 0.001 | 0.003 |
| FBgn0010097 | 5.937    | 11.874   | 0.000    | 0.000  | #DIV/0! | 0.003 | 0.012 |
| FBgn0022981 | 12.677   | 25.355   | 0.000    | 0.000  | #DIV/0! | 0.000 | 0.000 |
| FBgn0026169 | 4.489    | 8.978    | 0.000    | 0.000  | #DIV/0! | 0.008 | 0.030 |
| FBgn0031254 | 7.239    | 14.479   | 0.000    | 0.000  | #DIV/0! | 0.000 | 0.002 |
| FBgn0031677 | 8.624    | 17.248   | 0.000    | 0.000  | #DIV/0! | 0.001 | 0.003 |
| FBgn0031878 | 4.859    | 9.718    | 0.000    | 0.000  | #DIV/0! | 0.006 | 0.023 |
| FBgn0032493 | 7.239    | 14.479   | 0.000    | 0.000  | #DIV/0! | 0.000 | 0.000 |
| FBgn0034372 | 4.634    | 9.268    | 0.000    | 0.000  | #DIV/0! | 0.006 | 0.022 |
| FBgn0036330 | 4.135    | 8.271    | 0.000    | 0.000  | #DIV/0! | 0.010 | 0.034 |
| FBgn0036332 | 11.053   | 22.106   | 0.000    | 0.000  | #DIV/0! | 0.000 | 0.000 |

|             |        |        |       |         |         |       |       |
|-------------|--------|--------|-------|---------|---------|-------|-------|
| FBgn0036437 | 6.677  | 13.355 | 0.000 | 0.000   | #DIV/0! | 0.006 | 0.022 |
| FBgn0037205 | 3.862  | 7.723  | 0.000 | 0.000   | #DIV/0! | 0.014 | 0.046 |
| FBgn0037781 | 3.249  | 6.499  | 0.000 | 0.000   | #DIV/0! | 0.014 | 0.046 |
| FBgn0038144 | 7.932  | 15.864 | 0.000 | 0.000   | #DIV/0! | 0.000 | 0.001 |
| FBgn0039007 | 5.760  | 11.520 | 0.000 | 0.000   | #DIV/0! | 0.001 | 0.006 |
| FBgn0039104 | 6.162  | 12.324 | 0.000 | 0.000   | #DIV/0! | 0.002 | 0.009 |
| FBgn0039972 | 14.609 | 29.219 | 0.000 | 0.000   | #DIV/0! | 0.000 | 0.000 |
| FBgn0040045 | 17.084 | 34.169 | 0.000 | 0.000   | #DIV/0! | 0.001 | 0.003 |
| FBgn0040251 | 5.244  | 10.489 | 0.000 | 0.000   | #DIV/0! | 0.005 | 0.019 |
| FBgn0042179 | 7.658  | 15.316 | 0.000 | 0.000   | #DIV/0! | 0.000 | 0.000 |
| FBgn0047199 | 7.353  | 14.706 | 0.000 | 0.000   | #DIV/0! | 0.002 | 0.009 |
| FBgn0050105 | 21.093 | 42.186 | 0.000 | 0.000   | #DIV/0! | 0.000 | 0.000 |
| FBgn0050354 | 5.406  | 10.813 | 0.000 | 0.000   | #DIV/0! | 0.003 | 0.013 |
| FBgn0050356 | 3.990  | 7.980  | 0.000 | 0.000   | #DIV/0! | 0.014 | 0.045 |
| FBgn0051105 | 3.073  | 6.145  | 0.000 | 0.000   | #DIV/0! | 0.005 | 0.021 |
| FBgn0052845 | 4.344  | 8.687  | 0.000 | 0.000   | #DIV/0! | 0.003 | 0.014 |
| FBgn0053306 | 4.038  | 8.077  | 0.000 | 0.000   | #DIV/0! | 0.011 | 0.038 |
| FBgn0053965 | 5.148  | 10.295 | 0.000 | 0.000   | #DIV/0! | 0.011 | 0.037 |
| FBgn0083012 | 5.632  | 11.263 | 0.000 | 0.000   | #DIV/0! | 0.005 | 0.020 |
| FBgn0085317 | 5.632  | 11.263 | 0.000 | 0.000   | #DIV/0! | 0.003 | 0.015 |
| FBgn0086039 | 4.939  | 9.878  | 0.000 | 0.000   | #DIV/0! | 0.009 | 0.032 |
| FBgn0261267 | 5.760  | 11.520 | 0.000 | 0.000   | #DIV/0! | 0.002 | 0.009 |
| FBgn0261587 | 9.992  | 19.984 | 0.000 | 0.000   | #DIV/0! | 0.005 | 0.021 |
| FBgn0261952 | 3.845  | 7.690  | 0.000 | 0.000   | #DIV/0! | 0.010 | 0.034 |
| FBgn0261998 | 6.082  | 12.164 | 0.000 | 0.000   | #DIV/0! | 0.001 | 0.004 |
| FBgn0262004 | 4.440  | 8.881  | 0.000 | 0.000   | #DIV/0! | 0.007 | 0.026 |
| FBgn0262607 | 4.811  | 9.622  | 0.000 | 0.000   | #DIV/0! | 0.003 | 0.013 |
| FBgn0262840 | 4.070  | 8.140  | 0.000 | 0.000   | #DIV/0! | 0.007 | 0.027 |
| FBgn0263399 | 3.797  | 7.593  | 0.000 | 0.000   | #DIV/0! | 0.013 | 0.043 |
| FBgn0263476 | 21.929 | 43.858 | 0.000 | 0.000   | #DIV/0! | 0.000 | 0.000 |
| FBgn0263521 | 4.264  | 8.527  | 0.000 | 0.000   | #DIV/0! | 0.008 | 0.029 |
| FBgn0263621 | 48.039 | 96.079 | 0.000 | 0.000   | #DIV/0! | 0.000 | 0.000 |
| FBgn0264475 | 3.668  | 7.336  | 0.000 | 0.000   | #DIV/0! | 0.007 | 0.024 |
| FBgn0036879 | 2.893  | 0.000  | 5.786 | #DIV/0! | #DIV/0! | 0.007 | 0.027 |



**Table S3: Gene-Ontology (GO) analysis of genes with altered expression in 3d and 10d Spd<sup>5mM+</sup> versus age matched Spd<sup>-</sup> flies.**

**Table S3.1: GO analysis of genes with altered expression only in 3d Spd<sup>5mM+</sup> versus Spd<sup>-</sup> flies.**

| <b>GO-terms</b>                                                   | <b>Fold Enrichment</b> | <b>p-value</b> | <b>Benjamini</b> |
|-------------------------------------------------------------------|------------------------|----------------|------------------|
| innate immune response                                            | 5.331399609            | 3.50E-05       | 0.035355936      |
| immune response                                                   | 3.693836846            | 9.65E-05       | 0.048382355      |
| defense response                                                  | 3.608430214            | 1.22E-04       | 0.041049019      |
| response to bacterium                                             | 5.01636236             | 3.85E-04       | 0.094271783      |
| defense response to bacterium                                     | 5.169842045            | 8.20E-04       | 0.155165507      |
| Wnt receptor signaling pathway                                    | 4.396186105            | 0.004879198    | 0.567431861      |
| regulation of production of molecular mediator of immune response | 7.43164794             | 0.015640977    | 0.901247863      |
| regulation of immune effector process                             | 7.43164794             | 0.015640977    | 0.901247863      |
| positive regulation of antimicrobial peptide biosynthetic process | 7.43164794             | 0.015640977    | 0.901247863      |
| regulation of antimicrobial peptide biosynthetic process          | 7.43164794             | 0.015640977    | 0.901247863      |
| regulation of antimicrobial peptide production                    | 7.43164794             | 0.015640977    | 0.901247863      |
| defense response to Gram-positive bacterium                       | 7.43164794             | 0.015640977    | 0.901247863      |
| regulation of antimicrobial humoral response                      | 6.369983949            | 0.02372915     | 0.954313655      |
| regulation of response to biotic stimulus                         | 6.369983949            | 0.02372915     | 0.954313655      |
| regulation of humoral immune response                             | 6.369983949            | 0.02372915     | 0.954313655      |
| regulation of multi-organism process                              | 6.369983949            | 0.02372915     | 0.954313655      |
| protein targeting to membrane                                     | 6.15032933             | 0.026043444    | 0.950913062      |
| regulation of Toll signaling pathway                              | 11.14747191            | 0.028181607    | 0.947064168      |
| cell redox homeostasis                                            | 4.206593174            | 0.029996558    | 0.941936599      |
| imaginal disc-derived wing hair organization                      | 5.404834866            | 0.036463061    | 0.958499157      |
| hair cell differentiation                                         | 5.245869134            | 0.039355312    | 0.95820554       |
| non-sensory hair organization                                     | 5.245869134            | 0.039355312    | 0.95820554       |
| imaginal disc development                                         | 1.731646122            | 0.041506773    | 0.955525597      |
| eclosion                                                          | 8.917977528            | 0.042923817    | 0.950546078      |
| epidermal cell differentiation                                    | 4.95443196             | 0.045477984    | 0.949737131      |
| instar larval or pupal morphogenesis                              | 1.79901564             | 0.046128739    | 0.942491243      |
| post-embryonic morphogenesis                                      | 1.76843747             | 0.051617593    | 0.951526822      |
| establishment of imaginal disc-derived wing hair orientation      | 7.868803701            | 0.054013101    | 0.950425521      |
| protein targeting to ER                                           | 7.868803701            | 0.054013101    | 0.950425521      |
| SRP-dependent cotranslational protein targeting to membrane       | 7.868803701            | 0.054013101    | 0.950425521      |
| positive regulation of biosynthetic process                       | 2.331497393            | 0.054814449    | 0.944845926      |
| positive regulation of cellular biosynthetic process              | 2.331497393            | 0.054814449    | 0.944845926      |
| establishment of cell polarity                                    | 7.43164794             | 0.059895645    | 0.951369975      |
| cotranslational protein targeting to membrane                     | 7.43164794             | 0.059895645    | 0.951369975      |
| post-embryonic development                                        | 1.643866825            | 0.060164106    | 0.944945257      |

|                                               |             |             |             |
|-----------------------------------------------|-------------|-------------|-------------|
| metamorphosis                                 | 1.724470793 | 0.060670808 | 0.939035823 |
| wing disc pattern formation                   | 3.278668209 | 0.064766098 | 0.943191016 |
| peptide cross-linking                         | 29.72659176 | 0.065429049 | 0.938116216 |
| post-embryonic organ development              | 1.801611622 | 0.067893704 | 0.937954466 |
| mitotic spindle organization                  | 2.068603035 | 0.068301958 | 0.932363514 |
| post-embryonic appendage morphogenesis        | 1.947156666 | 0.070107418 | 0.93065228  |
| homeostatic process                           | 2.188460743 | 0.071887059 | 0.928959629 |
| calcium-dependent cell-cell adhesion          | 6.369983949 | 0.078745632 | 0.939826364 |
| establishment of ommatidial polarity          | 3.877381534 | 0.082478989 | 0.942416385 |
| instar larval or pupal development            | 1.600115585 | 0.083129881 | 0.938462664 |
| imaginal disc-derived appendage morphogenesis | 1.865685675 | 0.086213786 | 0.939709343 |
| RNA processing                                | 1.714995678 | 0.088913325 | 0.94012087  |
| macromolecule catabolic process               | 1.77071756  | 0.0905227   | 0.938389011 |
| epidermis development                         | 3.71582397  | 0.091057417 | 0.934538599 |
| appendage morphogenesis                       | 1.842557341 | 0.091445747 | 0.930364698 |
| syncytium formation                           | 5.816072301 | 0.09219855  | 0.926963065 |
| syncytium formation by plasma membrane fusion | 5.816072301 | 0.09219855  | 0.926963065 |
| myotube differentiation                       | 5.816072301 | 0.09219855  | 0.926963065 |
| myoblast fusion                               | 5.816072301 | 0.09219855  | 0.926963065 |
| imaginal disc-derived appendage development   | 1.8349748   | 0.093230725 | 0.924201756 |
| mitotic spindle elongation                    | 2.858326131 | 0.096002624 | 0.92526978  |
| wing disc development                         | 1.745511616 | 0.09722816  | 0.923051581 |
| appendage development                         | 1.812597059 | 0.09870833  | 0.921426539 |
| spindle elongation                            | 2.822144787 | 0.099457523 | 0.918279121 |
| mushroom body development                     | 3.567191011 | 0.099990612 | 0.914681253 |
| wing disc dorsal/ventral pattern formation    | 3.567191011 | 0.099990612 | 0.914681253 |

**Table S3.2: Gene-ontology analysis of genes with altered expression only in 10d Spd<sup>5mM+</sup> versus Spd<sup>-</sup> flies.**

| <b>GO-terms</b>                                        | <b>Fold Enrichment</b> | <b>p-value</b> | <b>Benjamini</b> |
|--------------------------------------------------------|------------------------|----------------|------------------|
| neuron differentiation                                 | 1.641444959            | 6.97E-08       | 1.80E-04         |
| neuron development                                     | 1.681586951            | 1.76E-07       | 2.27E-04         |
| vesicle-mediated transport                             | 1.620729254            | 3.33E-07       | 2.86E-04         |
| intracellular signaling cascade                        | 1.690049374            | 1.16E-06       | 7.51E-04         |
| cell motion                                            | 1.604577205            | 1.30E-05       | 0.006687792      |
| protein localization                                   | 1.52055941             | 1.43E-05       | 0.006154024      |
| cell morphogenesis involved in neuron differentiation  | 1.612148661            | 1.88E-05       | 0.006919498      |
| cell morphogenesis                                     | 1.476307835            | 2.05E-05       | 0.006591207      |
| neuron projection development                          | 1.595904202            | 3.11E-05       | 0.008881927      |
| cell morphogenesis involved in differentiation         | 1.573753897            | 3.48E-05       | 0.008963539      |
| neuron projection morphogenesis                        | 1.579546146            | 5.08E-05       | 0.011863068      |
| endocytosis                                            | 1.605055612            | 6.54E-05       | 0.013977586      |
| membrane invagination                                  | 1.605055612            | 6.54E-05       | 0.013977586      |
| cellular component morphogenesis                       | 1.405057457            | 6.58E-05       | 0.012994492      |
| secretion                                              | 1.907389723            | 7.90E-05       | 0.014472329      |
| transcription                                          | 1.421629767            | 1.03E-04       | 0.017665346      |
| cell fate commitment                                   | 1.62266594             | 1.06E-04       | 0.017046886      |
| membrane organization                                  | 1.51448821             | 1.20E-04       | 0.018107938      |
| regulation of transcription                            | 1.295695707            | 1.63E-04       | 0.023172046      |
| regulation of RNA metabolic process                    | 1.314088169            | 2.64E-04       | 0.035308293      |
| secretion by cell                                      | 1.861023648            | 2.68E-04       | 0.034056869      |
| cytoskeleton organization                              | 1.389793021            | 2.75E-04       | 0.033302501      |
| establishment of protein localization                  | 1.497027945            | 4.47E-04       | 0.051180122      |
| regulation of cellular component biogenesis            | 2.039150198            | 4.49E-04       | 0.049184275      |
| neurotransmitter transport                             | 1.792659514            | 4.71E-04       | 0.049410818      |
| axon guidance                                          | 1.753115555            | 5.10E-04       | 0.051384459      |
| post-embryonic organ development                       | 1.478793202            | 5.27E-04       | 0.051032039      |
| photoreceptor cell differentiation                     | 1.764649209            | 6.46E-04       | 0.060010305      |
| post-embryonic organ morphogenesis                     | 1.480206536            | 6.85E-04       | 0.061317087      |
| imaginal disc morphogenesis                            | 1.480206536            | 6.85E-04       | 0.061317087      |
| regulation of neurotransmitter levels                  | 1.825253324            | 7.44E-04       | 0.064206084      |
| regulation of developmental growth                     | 2.50972332             | 7.66E-04       | 0.063841422      |
| axonogenesis                                           | 1.584421288            | 7.76E-04       | 0.062620816      |
| morphogenesis of a polarized epithelium                | 2.061558442            | 8.89E-04       | 0.069269843      |
| intracellular transport                                | 1.443291366            | 8.96E-04       | 0.067802022      |
| cell projection morphogenesis                          | 1.431326581            | 0.001048501    | 0.076632415      |
| protein transport                                      | 1.467014531            | 0.001063047    | 0.075521032      |
| generation of a signal involved in cell-cell signaling | 1.827468437            | 0.001105703    | 0.07633778       |
| cell projection organization                           | 1.392380746            | 0.00127746     | 0.085403273      |
| photoreceptor cell development                         | 2.0914361              | 0.001305262    | 0.084985884      |
| regulation of cell morphogenesis                       | 1.739934235            | 0.001464083    | 0.092512925      |
| appendage development                                  | 1.479308461            | 0.001667052    | 0.102176202      |
| cell part morphogenesis                                | 1.402715451            | 0.001723969    | 0.103041658      |
| regulation of transcription, DNA-                      | 1.281517218            | 0.001793373    | 0.104554722      |

|                                                 |             |             |             |
|-------------------------------------------------|-------------|-------------|-------------|
| dependent                                       |             |             |             |
| post-embryonic morphogenesis                    | 1.386391069 | 0.001798182 | 0.102511964 |
| regulation of programmed cell death             | 1.7522843   | 0.001863371 | 0.103747207 |
| appendage morphogenesis                         | 1.477832947 | 0.00188125  | 0.102486659 |
| eye photoreceptor cell differentiation          | 1.730843669 | 0.001918693 | 0.102268278 |
| neurotransmitter secretion                      | 1.783871968 | 0.002026575 | 0.105536826 |
| imaginal disc-derived appendage development     | 1.47175133  | 0.002076374 | 0.105861261 |
| establishment of planar polarity                | 2.057150262 | 0.002189332 | 0.109150967 |
| wing disc development                           | 1.429023955 | 0.002305458 | 0.112443974 |
| endosome transport                              | 2.875724638 | 0.002321863 | 0.111106475 |
| imaginal disc-derived appendage morphogenesis   | 1.470130815 | 0.002342195 | 0.109992689 |
| border follicle cell migration                  | 1.996370823 | 0.002445155 | 0.112510697 |
| post-embryonic development                      | 1.330037704 | 0.002553655 | 0.115164417 |
| phosphorus metabolic process                    | 1.286745622 | 0.002598382 | 0.115060154 |
| phosphate metabolic process                     | 1.286745622 | 0.002598382 | 0.115060154 |
| instar larval or pupal morphogenesis            | 1.374200089 | 0.002647508 | 0.115139757 |
| mitotic cell cycle                              | 1.367028065 | 0.002680307 | 0.114559826 |
| establishment of tissue polarity                | 2.023970419 | 0.002695304 | 0.113294674 |
| synaptic vesicle transport                      | 1.812577953 | 0.002889965 | 0.119049577 |
| secondary metabolic process                     | 1.917149758 | 0.003228599 | 0.130006849 |
| cell-cell signaling                             | 1.486802915 | 0.003254556 | 0.128979669 |
| sex determination                               | 2.760695652 | 0.003325125 | 0.129609687 |
| regulation of cell death                        | 1.691335281 | 0.00334358  | 0.128352037 |
| metamorphosis                                   | 1.351922783 | 0.003638989 | 0.1368719   |
| imaginal disc development                       | 1.324914617 | 0.00376202  | 0.139151542 |
| compound eye photoreceptor cell differentiation | 1.695759    | 0.003785783 | 0.138000339 |
| instar larval or pupal development              | 1.320907011 | 0.003864991 | 0.138732859 |
| somatic sex determination                       | 3.13715415  | 0.003956108 | 0.139834328 |
| pattern specification process                   | 1.294076087 | 0.004126031 | 0.143444809 |
| negative regulation of signal transduction      | 1.722359141 | 0.004204109 | 0.144029046 |
| stem cell division                              | 2.0914361   | 0.0043946   | 0.148104283 |
| regulation of cell shape                        | 1.72863596  | 0.004757786 | 0.157312559 |
| negative regulation of cell communication       | 1.705637208 | 0.004855571 | 0.158267092 |
| reproductive developmental process              | 1.277181334 | 0.005163959 | 0.16538693  |
| cell fate determination                         | 1.605055612 | 0.005718733 | 0.179297783 |
| synaptic vesicle endocytosis                    | 2.330457369 | 0.005929085 | 0.183059392 |
| positive regulation of transferase activity     | 2.556199678 | 0.006341978 | 0.192251595 |
| positive regulation of protein kinase activity  | 2.556199678 | 0.006341978 | 0.192251595 |
| positive regulation of kinase activity          | 2.556199678 | 0.006341978 | 0.192251595 |
| post-embryonic appendage morphogenesis          | 1.424733763 | 0.006597894 | 0.19691975  |
| compound eye photoreceptor development          | 2.012513983 | 0.006655478 | 0.196212842 |
| sensory organ development                       | 1.300771233 | 0.007009734 | 0.203247902 |
| female meiosis II                               | 5.22859025  | 0.007329265 | 0.209171113 |
| wing disc morphogenesis                         | 1.425979159 | 0.007636589 | 0.214605584 |
| negative regulation of Notch signaling          | 3.13715415  | 0.007761793 | 0.215404457 |

|                                                                       |             |             |             |
|-----------------------------------------------------------------------|-------------|-------------|-------------|
| pathway                                                               |             |             |             |
| mitotic spindle organization                                          | 1.455380791 | 0.00798609  | 0.218588642 |
| eye photoreceptor cell development                                    | 1.975245206 | 0.008093794 | 0.218900312 |
| synaptic transmission                                                 | 1.46068553  | 0.008191214 | 0.218961586 |
| regulation of apoptosis                                               | 1.681773359 | 0.008257491 | 0.218292922 |
| cell surface receptor linked signal transduction                      | 1.228885224 | 0.00827176  | 0.216433294 |
| cellular component disassembly                                        | 2.464906832 | 0.008484828 | 0.219169408 |
| open tracheal system development                                      | 1.517316386 | 0.008634735 | 0.220411731 |
| respiratory system development                                        | 1.517316386 | 0.008634735 | 0.220411731 |
| ovarian follicle cell migration                                       | 1.7696767   | 0.008846501 | 0.22300352  |
| regulation of growth                                                  | 1.644721593 | 0.009499236 | 0.235153353 |
| transmission of nerve impulse                                         | 1.440529967 | 0.009619913 | 0.235537818 |
| localization of cell                                                  | 1.440529967 | 0.009619913 | 0.235537818 |
| cell migration                                                        | 1.469980802 | 0.00971285  | 0.235325619 |
| reproductive cellular process                                         | 1.25486166  | 0.009795622 | 0.234904403 |
| establishment of ommatidial polarity                                  | 2.045970098 | 0.010001643 | 0.237052613 |
| imaginal disc-derived wing morphogenesis                              | 1.410280306 | 0.010224396 | 0.239494127 |
| regulation of transcription from RNA polymerase II promoter           | 1.437862319 | 0.010836707 | 0.249709408 |
| cell motility                                                         | 1.442755385 | 0.011141428 | 0.253555959 |
| regulation of synapse organization                                    | 2.379910045 | 0.011142018 | 0.251381447 |
| antimicrobial humoral response                                        | 1.792659514 | 0.011345993 | 0.253184412 |
| regulation of actin polymerization or depolymerization                | 2.688989272 | 0.0118101   | 0.259899994 |
| regulation of actin filament length                                   | 2.688989272 | 0.0118101   | 0.259899994 |
| phosphorylation                                                       | 1.269624738 | 0.01233177  | 0.26750237  |
| regionalization                                                       | 1.257625673 | 0.012996041 | 0.277485801 |
| regulation of cell development                                        | 1.532655463 | 0.013006345 | 0.275432038 |
| protein amino acid phosphorylation                                    | 1.3566072   | 0.013166336 | 0.276092856 |
| asymmetric protein localization                                       | 2.214461753 | 0.013293471 | 0.276159368 |
| cell division                                                         | 1.40789357  | 0.013307693 | 0.274240385 |
| germ cell development                                                 | 1.368470535 | 0.013517301 | 0.27575993  |
| microtubule cytoskeleton organization                                 | 1.326447728 | 0.013729149 | 0.277288062 |
| regulation of striated muscle tissue development                      | 2.30057971  | 0.014383971 | 0.286291058 |
| eye development                                                       | 1.303997809 | 0.014445019 | 0.285160818 |
| progression of morphogenetic furrow during compound eye morphogenesis | 4.481648786 | 0.01495493  | 0.291468762 |
| asymmetric protein localization involved in cell fate determination   | 3.13715415  | 0.015292083 | 0.294817163 |
| actin cytoskeleton organization                                       | 1.491793582 | 0.01541557  | 0.294662413 |
| regulation of skeletal muscle tissue development                      | 2.566762487 | 0.016023398 | 0.302201975 |
| regulation of striated muscle cell differentiation                    | 2.566762487 | 0.016023398 | 0.302201975 |
| regulation of skeletal muscle fiber development                       | 2.566762487 | 0.016023398 | 0.302201975 |
| regulation of muscle cell differentiation                             | 2.566762487 | 0.016023398 | 0.302201975 |
| regulation of synaptic growth at neuromuscular junction               | 2.566762487 | 0.016023398 | 0.302201975 |
| actin filament-based process                                          | 1.481433904 | 0.017039592 | 0.31584483  |
| phagocytosis, engulfment                                              | 1.409202934 | 0.017889832 | 0.326524453 |

|                                                  |             |             |             |
|--------------------------------------------------|-------------|-------------|-------------|
| humoral immune response                          | 1.66306967  | 0.018067017 | 0.326925736 |
| spindle organization                             | 1.366404919 | 0.018107392 | 0.325299136 |
| regulation of Wnt receptor signaling pathway     | 2.226367461 | 0.018280828 | 0.325650213 |
| regulation of synapse structure and activity     | 2.039150198 | 0.018524539 | 0.327017147 |
| nucleoside monophosphate metabolic process       | 1.859054311 | 0.018673215 | 0.32699211  |
| small GTPase mediated signal transduction        | 1.55418646  | 0.019650514 | 0.338713581 |
| positive regulation of catalytic activity        | 1.764649209 | 0.019895646 | 0.33994311  |
| positive regulation of cell death                | 1.952007027 | 0.019999542 | 0.339201449 |
| positive regulation of programmed cell death     | 1.952007027 | 0.019999542 | 0.339201449 |
| nucleoside monophosphate biosynthetic process    | 1.88229249  | 0.02114573  | 0.35264129  |
| regulation of synaptogenesis                     | 2.455164118 | 0.021222301 | 0.351463275 |
| microtubule-based process                        | 1.251770868 | 0.021236028 | 0.349465339 |
| activation of protein kinase activity            | 2.92801054  | 0.022119156 | 0.358916871 |
| regulation of protein amino acid phosphorylation | 2.92801054  | 0.022119156 | 0.358916871 |
| protein kinase cascade                           | 1.777720685 | 0.022641502 | 0.36348133  |
| intracellular protein transport                  | 1.406310481 | 0.023343483 | 0.370219824 |
| cell adhesion                                    | 1.406310481 | 0.023343483 | 0.370219824 |
| establishment of organelle localization          | 1.67314888  | 0.023459714 | 0.369486163 |
| immune response                                  | 1.410791215 | 0.024104383 | 0.375318031 |
| programmed cell death                            | 1.435299284 | 0.024221221 | 0.374572004 |
| photoreceptor cell fate commitment               | 1.845384794 | 0.025009702 | 0.381975652 |
| cell proliferation                               | 1.482120071 | 0.025332693 | 0.383664706 |
| phagocytosis                                     | 1.369519071 | 0.02604916  | 0.389957404 |
| dendrite morphogenesis                           | 1.501543867 | 0.026603012 | 0.394224219 |
| dendrite development                             | 1.501543867 | 0.026603012 | 0.394224219 |
| sensory perception of light stimulus             | 1.679040249 | 0.026762804 | 0.393890853 |
| amine transport                                  | 1.942047807 | 0.027084783 | 0.395412026 |
| transcription, DNA-dependent                     | 1.462432762 | 0.027187866 | 0.394434475 |
| regulation of protein complex assembly           | 2.352865613 | 0.027509646 | 0.395928623 |
| regulation of muscle development                 | 2.0914361   | 0.028309144 | 0.402691122 |
| compound eye photoreceptor fate commitment       | 1.868942898 | 0.028421979 | 0.401803799 |
| eye photoreceptor cell fate commitment           | 1.868942898 | 0.028421979 | 0.401803799 |
| organelle localization                           | 1.606835053 | 0.030157033 | 0.418387988 |
| specification of segmental identity, head        | 3.13715415  | 0.030281966 | 0.417560228 |
| eye-antennal disc development                    | 1.720374857 | 0.030388779 | 0.416552323 |
| apoptosis                                        | 1.629690468 | 0.030412781 | 0.414690022 |
| positive regulation of molecular function        | 1.655720246 | 0.030554993 | 0.414078708 |
| regulation of cell projection organization       | 1.981360516 | 0.030618576 | 0.412660347 |
| regulation of actin filament polymerization      | 2.745009881 | 0.030733574 | 0.411787998 |
| synaptic growth at neuromuscular junction        | 5.01944664  | 0.031309894 | 0.415643733 |
| regulation of actin cytoskeleton organization    | 2.163554586 | 0.031570197 | 0.416239978 |
| regulation of actin filament-based process       | 2.163554586 | 0.031570197 | 0.416239978 |

|                                                                      |             |             |             |
|----------------------------------------------------------------------|-------------|-------------|-------------|
| RNA processing                                                       | 1.266927638 | 0.033745886 | 0.435767011 |
| generation of precursor metabolites and energy                       | 1.330037704 | 0.033890842 | 0.435098898 |
| establishment or maintenance of cell polarity                        | 1.496623998 | 0.034257792 | 0.436574142 |
| induction of programmed cell death                                   | 2.029923274 | 0.034565674 | 0.437465643 |
| female meiosis                                                       | 1.693067319 | 0.034924544 | 0.438827505 |
| ommatidial rotation                                                  | 2.258750988 | 0.034977005 | 0.437291803 |
| cellular protein localization                                        | 1.367028065 | 0.035058988 | 0.436048062 |
| RNA biosynthetic process                                             | 1.430173216 | 0.035875869 | 0.441644449 |
| compound eye development                                             | 1.263010112 | 0.037169177 | 0.451442897 |
| regulation of protein kinase cascade                                 | 1.853772907 | 0.038205869 | 0.458697196 |
| regulation of protein modification process                           | 1.853772907 | 0.038205869 | 0.458697196 |
| eye morphogenesis                                                    | 1.282851139 | 0.0382449   | 0.457025072 |
| head segmentation                                                    | 2.390212686 | 0.038343487 | 0.455892813 |
| defense response to Gram-negative bacterium                          | 2.0914361   | 0.038935722 | 0.459086903 |
| neuron fate commitment                                               | 1.742863417 | 0.039728378 | 0.463951102 |
| macromolecular complex disassembly                                   | 2.583538712 | 0.041273633 | 0.475056444 |
| cellular macromolecular complex disassembly                          | 2.583538712 | 0.041273633 | 0.475056444 |
| glucan metabolic process                                             | 3.485726834 | 0.041284811 | 0.473155996 |
| energy reserve metabolic process                                     | 3.485726834 | 0.041284811 | 0.473155996 |
| cellular glucan metabolic process                                    | 3.485726834 | 0.041284811 | 0.473155996 |
| glycogen metabolic process                                           | 3.485726834 | 0.041284811 | 0.473155996 |
| embryonic pattern specification                                      | 1.303752374 | 0.04129318  | 0.471247606 |
| regulation of nervous system development                             | 1.533719807 | 0.041838877 | 0.473805234 |
| amino acid transport                                                 | 1.88229249  | 0.043618289 | 0.486310751 |
| phototransduction                                                    | 1.812577953 | 0.044826351 | 0.493929298 |
| visual perception                                                    | 1.613393563 | 0.044956163 | 0.492974444 |
| regulation of phosphorylation                                        | 1.64097294  | 0.045440166 | 0.494788055 |
| biological adhesion                                                  | 1.334959213 | 0.045562791 | 0.493785746 |
| cellular macromolecule localization                                  | 1.285718914 | 0.046353991 | 0.497926928 |
| nitrogen compound biosynthetic process                               | 1.292561367 | 0.047011797 | 0.5009861   |
| compound eye morphogenesis                                           | 1.279958893 | 0.047447568 | 0.502333636 |
| neuroblast division                                                  | 2.281566655 | 0.048759529 | 0.510145255 |
| asymmetric neuroblast division                                       | 2.281566655 | 0.048759529 | 0.510145255 |
| synaptogenesis                                                       | 2.281566655 | 0.048759529 | 0.510145255 |
| cell death                                                           | 1.355560435 | 0.051077522 | 0.524964062 |
| negative regulation of transcription from RNA polymerase II promoter | 1.64572021  | 0.052068058 | 0.530010243 |
| female gamete generation                                             | 1.172123529 | 0.052448314 | 0.530729281 |
| antibacterial humoral response                                       | 2.0914361   | 0.053745725 | 0.537738116 |
| cytoplasmic transport                                                | 2.440008783 | 0.053833649 | 0.536415264 |
| regulation of protein polymerization                                 | 2.440008783 | 0.053833649 | 0.536415264 |
| death                                                                | 1.347244114 | 0.055052511 | 0.542723603 |
| energy derivation by oxidation of organic compounds                  | 1.430982595 | 0.055212423 | 0.541883328 |
| negative regulation of protein complex assembly                      | 4.1828722   | 0.055290522 | 0.540506863 |
| endosome to lysosome transport                                       | 4.1828722   | 0.055290522 | 0.540506863 |

|                                                                  |             |             |             |
|------------------------------------------------------------------|-------------|-------------|-------------|
| negative regulation of protein polymerization                    | 4.1828722   | 0.055290522 | 0.540506863 |
| negative regulation of actin filament polymerization             | 4.1828722   | 0.055290522 | 0.540506863 |
| regulation of phosphorus metabolic process                       | 1.568577075 | 0.056905303 | 0.549232993 |
| regulation of phosphate metabolic process                        | 1.568577075 | 0.056905303 | 0.549232993 |
| aging                                                            | 1.484244974 | 0.057074005 | 0.548442791 |
| determination of adult life span                                 | 1.484244974 | 0.057074005 | 0.548442791 |
| multicellular organismal aging                                   | 1.484244974 | 0.057074005 | 0.548442791 |
| protein complex disassembly                                      | 2.688989272 | 0.058255465 | 0.554155838 |
| cellular protein complex disassembly                             | 2.688989272 | 0.058255465 | 0.554155838 |
| primary sex determination, soma                                  | 2.688989272 | 0.058255465 | 0.554155838 |
| peripheral nervous system development                            | 1.497278117 | 0.058755465 | 0.555457965 |
| maintenance of protein location                                  | 1.8653349   | 0.05892616  | 0.554673461 |
| positive regulation of macromolecule metabolic process           | 1.369743361 | 0.059318403 | 0.555285762 |
| positive regulation of biosynthetic process                      | 1.353282182 | 0.059398526 | 0.55394456  |
| positive regulation of cellular biosynthetic process             | 1.353282182 | 0.059398526 | 0.55394456  |
| regulation of alternative nuclear mRNA splicing, via spliceosome | 1.651133763 | 0.059747544 | 0.554287872 |
| regulation of cell projection assembly                           | 3.13715415  | 0.060341782 | 0.556142302 |
| regulation of protein ubiquitination                             | 3.13715415  | 0.060341782 | 0.556142302 |
| regulation of exit from mitosis                                  | 3.13715415  | 0.060341782 | 0.556142302 |
| maintenance of location                                          | 1.735446977 | 0.060350681 | 0.554381724 |
| transcription from RNA polymerase II promoter                    | 1.457667585 | 0.060948149 | 0.556238842 |
| posttranscriptional regulation of gene expression                | 1.394290733 | 0.061141243 | 0.555617864 |
| segmentation                                                     | 1.25486166  | 0.061335324 | 0.555008399 |
| regulation of cellular localization                              | 1.568577075 | 0.065132277 | 0.575696134 |
| regulation of mRNA processing                                    | 1.593475124 | 0.066506487 | 0.581775129 |
| regulation of nuclear mRNA splicing, via spliceosome             | 1.593475124 | 0.066506487 | 0.581775129 |
| asymmetric cell division                                         | 1.62266594  | 0.067708579 | 0.586759633 |
| torso signaling pathway                                          | 1.901305546 | 0.06771282  | 0.585006735 |
| maintenance of protein location in cell                          | 1.901305546 | 0.06771282  | 0.585006735 |
| spiracle morphogenesis, open tracheal system                     | 2.311587269 | 0.068461765 | 0.587399902 |
| organic acid transport                                           | 1.657364457 | 0.068671514 | 0.586797647 |
| carboxylic acid transport                                        | 1.657364457 | 0.068671514 | 0.586797647 |
| regulation of protein localization                               | 1.81624714  | 0.069036011 | 0.587050017 |
| regulation of tube architecture, open tracheal system            | 1.81624714  | 0.069036011 | 0.587050017 |
| gamete generation                                                | 1.132008071 | 0.073657958 | 0.609941561 |
| enzyme linked receptor protein signaling pathway                 | 1.341403844 | 0.074465153 | 0.612357889 |
| negative regulation of cell cycle                                | 2.0914361   | 0.074517769 | 0.610890913 |
| blastoderm segmentation                                          | 1.266374152 | 0.074822917 | 0.610723243 |
| cytokinesis                                                      | 1.490148221 | 0.076276759 | 0.616358004 |
| imaginal disc fusion                                             | 2.50972332  | 0.07632362  | 0.614879563 |



|                                                      |             |             |             |
|------------------------------------------------------|-------------|-------------|-------------|
| regulation of imaginal disc growth                   | 2.50972332  | 0.07632362  | 0.614879563 |
| posterior head segmentation                          | 2.50972332  | 0.07632362  | 0.614879563 |
| somatic stem cell division                           | 1.947199128 | 0.077944859 | 0.621219142 |
| oogenesis                                            | 1.152423974 | 0.0783845   | 0.621675434 |
| spermatid development                                | 1.505833992 | 0.078676264 | 0.621408369 |
| sexual reproduction                                  | 1.126814552 | 0.078881711 | 0.620724865 |
| regulation of MAPKKK cascade                         | 1.845384794 | 0.079645793 | 0.622744906 |
| MAPKKK cascade                                       | 1.711174991 | 0.079910153 | 0.622347799 |
| gland development                                    | 1.308751425 | 0.081547601 | 0.628470973 |
| pheromone metabolic process                          | 2.851958318 | 0.083238721 | 0.634702628 |
| regulation of vesicle-mediated transport             | 2.851958318 | 0.083238721 | 0.634702628 |
| female sex determination                             | 2.851958318 | 0.083238721 | 0.634702628 |
| regulation of cellular protein metabolic process     | 1.35138948  | 0.083852858 | 0.635882315 |
| lipid biosynthetic process                           | 1.370857276 | 0.084034142 | 0.635074027 |
| R7 cell fate commitment                              | 2.196007905 | 0.085160082 | 0.638561582 |
| transcription from RNA polymerase I promoter         | 3.585319029 | 0.085542216 | 0.638660149 |
| regulation of lamellipodium assembly                 | 3.585319029 | 0.085542216 | 0.638660149 |
| spindle assembly involved in female meiosis          | 3.585319029 | 0.085542216 | 0.638660149 |
| sex differentiation                                  | 1.568577075 | 0.085657435 | 0.637561246 |
| spermatid differentiation                            | 1.486020387 | 0.087004582 | 0.641958081 |
| learning                                             | 1.597096658 | 0.087775251 | 0.643751567 |
| translational initiation                             | 1.597096658 | 0.087775251 | 0.643751567 |
| ovarian follicle cell development                    | 1.261012943 | 0.089477064 | 0.649553356 |
| interphase of mitotic cell cycle                     | 2.007778656 | 0.089894733 | 0.6497603   |
| regulation of Notch signaling pathway                | 2.007778656 | 0.089894733 | 0.6497603   |
| interphase                                           | 2.007778656 | 0.089894733 | 0.6497603   |
| regulation of mitotic cell cycle                     | 1.40851819  | 0.09043672  | 0.650496304 |
| protein targeting                                    | 1.381499075 | 0.090907576 | 0.650924364 |
| segment specification                                | 1.67314888  | 0.091260794 | 0.650852633 |
| gene silencing by RNA                                | 1.67314888  | 0.091260794 | 0.650852633 |
| M phase of mitotic cell cycle                        | 1.314213225 | 0.09209965  | 0.652820822 |
| glutamine family amino acid metabolic process        | 1.88229249  | 0.09213     | 0.651394709 |
| RNA interference                                     | 1.88229249  | 0.09213     | 0.651394709 |
| R7 cell differentiation                              | 1.88229249  | 0.09213     | 0.651394709 |
| posttranscriptional gene silencing by RNA            | 1.725434783 | 0.092367667 | 0.650841671 |
| posttranscriptional gene silencing                   | 1.725434783 | 0.092367667 | 0.650841671 |
| maintenance of location in cell                      | 1.792659514 | 0.092772423 | 0.650988249 |
| positive regulation of apoptosis                     | 1.792659514 | 0.092772423 | 0.650988249 |
| regulation of RNA splicing                           | 1.521044436 | 0.092794577 | 0.64954626  |
| glycoprotein metabolic process                       | 1.521044436 | 0.092794577 | 0.64954626  |
| glucose metabolic process                            | 1.542862697 | 0.095662781 | 0.659768152 |
| glial cell development                               | 2.352865613 | 0.097046368 | 0.663790803 |
| development of primary female sexual characteristics | 2.352865613 | 0.097046368 | 0.663790803 |
| regulation of cell cycle                             | 1.28509929  | 0.099172085 | 0.670638484 |

**Table S3.3: Gene-ontology analysis of genes with altered expression in both 3d and 10d Spd<sup>5mM+</sup> versus Spd<sup>-</sup> flies.**

| <b>GO-terms</b>                                      | <b>Fold Enrichment</b> | <b>p-value</b> | <b>Benjamini</b> |
|------------------------------------------------------|------------------------|----------------|------------------|
| oxidation reduction                                  | 1.586406771            | 2.32E-07       | 5.20E-04         |
| tRNA metabolic process                               | 2.365668562            | 5.09E-05       | 0.055494114      |
| vesicle-mediated transport                           | 1.553066298            | 1.35E-04       | 0.096233097      |
| ncRNA metabolic process                              | 1.993510176            | 2.55E-04       | 0.133134162      |
| response to starvation                               | 5.442692006            | 6.86E-04       | 0.264993254      |
| intracellular transport                              | 1.502888482            | 0.001876845    | 0.504548744      |
| homeostatic process                                  | 1.731548815            | 0.002027781    | 0.478172761      |
| peptidoglycan metabolic process                      | 4.605354775            | 0.002072002    | 0.440963346      |
| peptidoglycan catabolic process                      | 4.605354775            | 0.002072002    | 0.440963346      |
| tRNA processing                                      | 2.547643067            | 0.002173702    | 0.418604757      |
| establishment of protein localization                | 1.500491531            | 0.003209874    | 0.513798837      |
| protein transport                                    | 1.507508218            | 0.00322726     | 0.482699738      |
| glycosaminoglycan catabolic process                  | 4.276400862            | 0.003270997    | 0.457954815      |
| cellular amino acid biosynthetic process             | 2.949241974            | 0.004447243    | 0.536538376      |
| cellular protein complex assembly                    | 1.957870274            | 0.006445725    | 0.645142823      |
| phagocytosis                                         | 1.562948538            | 0.007025544    | 0.651550078      |
| protein localization                                 | 1.37455742             | 0.007101093    | 0.631765692      |
| cellular homeostasis                                 | 1.772202159            | 0.008522133    | 0.676720786      |
| cellular macromolecular complex assembly             | 1.606890021            | 0.008688602    | 0.662917401      |
| cellular protein localization                        | 1.576773502            | 0.008835215    | 0.649240827      |
| aminoglycan catabolic process                        | 2.672750539            | 0.009038376    | 0.638778008      |
| response to oxidative stress                         | 2.103147965            | 0.009274741    | 0.630370175      |
| phagocytosis, engulfment                             | 1.555054859            | 0.009610107    | 0.626386143      |
| protein import into nucleus, docking                 | 3.521741886            | 0.00991294     | 0.621504319      |
| cellular macromolecular complex subunit organization | 1.516753015            | 0.011159178    | 0.649635379      |
| polysaccharide catabolic process                     | 2.591758098            | 0.011172058    | 0.635051221      |
| protein export from nucleus                          | 6.842241379            | 0.013240404    | 0.683321672      |
| aspartate family amino acid biosynthetic process     | 6.842241379            | 0.013240404    | 0.683321672      |
| carbohydrate catabolic process                       | 1.85482447             | 0.014117168    | 0.69306753       |
| organic acid biosynthetic process                    | 2.004562904            | 0.014172472    | 0.681278687      |
| carboxylic acid biosynthetic process                 | 2.004562904            | 0.014172472    | 0.681278687      |
| mitotic spindle elongation                           | 1.864072171            | 0.016722548    | 0.728648202      |
| cell redox homeostasis                               | 2.097857027            | 0.017117582    | 0.724978205      |
| tRNA aminoacylation for protein translation          | 2.183694057            | 0.017288852    | 0.716876467      |
| tRNA aminoacylation                                  | 2.183694057            | 0.017288852    | 0.716876467      |
| amine biosynthetic process                           | 2.183694057            | 0.017288852    | 0.716876467      |
| nuclear transport                                    | 1.900622605            | 0.017588134    | 0.711710063      |
| nucleocytoplasmic transport                          | 1.900622605            | 0.017588134    | 0.711710063      |
| intracellular protein transport                      | 1.52377502             | 0.017879998    | 0.706622198      |
| ncRNA processing                                     | 1.766339487            | 0.018548581    | 0.709209356      |
| spindle elongation                                   | 1.84047632             | 0.018774574    | 0.703177209      |
| protein processing                                   | 2.375778257            | 0.019834946    | 0.712992848      |
| nitrogen compound biosynthetic process               | 1.431584838            | 0.019912881    | 0.70457256       |
| amino acid activation                                | 2.138200431            | 0.020138245    | 0.699052236      |

|                                               |             |             |             |
|-----------------------------------------------|-------------|-------------|-------------|
| response to nutrient levels                   | 2.736896552 | 0.021011948 | 0.705163145 |
| response to extracellular stimulus            | 2.736896552 | 0.021011948 | 0.705163145 |
| bristle development                           | 2.021571317 | 0.022664254 | 0.723493617 |
| protein maturation                            | 2.311568034 | 0.023580716 | 0.728960617 |
| endocytosis                                   | 1.39231656  | 0.023890543 | 0.725102374 |
| membrane invagination                         | 1.39231656  | 0.023890543 | 0.725102374 |
| sulfur amino acid biosynthetic process        | 5.701867816 | 0.024197193 | 0.721326599 |
| membrane organization                         | 1.340564534 | 0.025580431 | 0.733128842 |
| defense response                              | 1.483144808 | 0.027807999 | 0.754807368 |
| macromolecular complex assembly               | 1.390699467 | 0.028027261 | 0.749964068 |
| Golgi organization                            | 2.850933908 | 0.028970663 | 0.754142004 |
| oxidoreduction coenzyme metabolic process     | 2.850933908 | 0.028970663 | 0.754142004 |
| transcription                                 | 1.267081737 | 0.029148726 | 0.749009898 |
| macromolecule catabolic process               | 1.358567783 | 0.030111153 | 0.753287487 |
| chromatin modification                        | 1.603650323 | 0.033986758 | 0.787997517 |
| secondary metabolic process                   | 1.781833693 | 0.03689298  | 0.808574303 |
| macromolecular complex subunit organization   | 1.33922874  | 0.037120661 | 0.804395498 |
| insecticide catabolic process                 | 8.552801724 | 0.037706758 | 0.803411509 |
| methionine biosynthetic process               | 8.552801724 | 0.037706758 | 0.803411509 |
| toxin catabolic process                       | 8.552801724 | 0.037706758 | 0.803411509 |
| xenobiotic catabolic process                  | 8.552801724 | 0.037706758 | 0.803411509 |
| cellular macromolecule localization           | 1.367046177 | 0.038005732 | 0.799997757 |
| methionine metabolic process                  | 4.887315271 | 0.038717598 | 0.800183077 |
| heterochromatin organization                  | 4.887315271 | 0.038717598 | 0.800183077 |
| pigment metabolic process                     | 1.814230669 | 0.039486616 | 0.800841192 |
| response to reactive oxygen species           | 3.018635903 | 0.04011731  | 0.800350147 |
| exocytosis                                    | 1.787152599 | 0.043971813 | 0.824306895 |
| ribonucleoprotein complex assembly            | 2.199291872 | 0.044882377 | 0.825489085 |
| cell growth                                   | 1.960017062 | 0.047507328 | 0.837901965 |
| protein complex biogenesis                    | 1.434002684 | 0.048842505 | 0.841389723 |
| protein complex assembly                      | 1.434002684 | 0.048842505 | 0.841389723 |
| cellular carbohydrate biosynthetic process    | 2.49456717  | 0.053187861 | 0.861552164 |
| response to inorganic substance               | 2.280747126 | 0.053329731 | 0.857898223 |
| membrane docking                              | 2.280747126 | 0.053329731 | 0.857898223 |
| vesicle docking                               | 2.280747126 | 0.053329731 | 0.857898223 |
| vesicle docking during exocytosis             | 2.280747126 | 0.053329731 | 0.857898223 |
| secretion by cell                             | 1.522108781 | 0.054647118 | 0.860477485 |
| monosaccharide metabolic process              | 1.587117846 | 0.055775574 | 0.861992169 |
| aspartate family amino acid metabolic process | 3.289539125 | 0.055805478 | 0.85794123  |
| pyridine nucleotide metabolic process         | 3.289539125 | 0.055805478 | 0.85794123  |
| NADP metabolic process                        | 4.276400862 | 0.056677489 | 0.85819748  |
| pentose-phosphate shunt                       | 4.276400862 | 0.056677489 | 0.85819748  |
| nuclear import                                | 2.08041123  | 0.059889288 | 0.869592831 |
| ion homeostasis                               | 1.881616379 | 0.060423535 | 0.868144554 |
| translational elongation                      | 2.700884755 | 0.062042861 | 0.871570844 |
| nuclear export                                | 2.207174638 | 0.062233242 | 0.868649247 |
| protein localization in nucleus               | 2.025663566 | 0.068445242 | 0.890161204 |
| ribosome assembly                             | 6.414601293 | 0.069613972 | 0.891070878 |
| transcription from mitochondrial              | 6.414601293 | 0.069613972 | 0.891070878 |

|                                      |             |             |             |
|--------------------------------------|-------------|-------------|-------------|
| promoter                             |             |             |             |
| sulfur amino acid metabolic process  | 3.054572044 | 0.071153566 | 0.893253373 |
| ribonucleoprotein complex biogenesis | 1.546783291 | 0.077111024 | 0.909273019 |
| response to xenobiotic stimulus      | 3.801245211 | 0.077833422 | 0.908501574 |
| xenobiotic metabolic process         | 3.801245211 | 0.077833422 | 0.908501574 |
| insecticide metabolic process        | 3.801245211 | 0.077833422 | 0.908501574 |
| toxin metabolic process              | 3.801245211 | 0.077833422 | 0.908501574 |
| chemical homeostasis                 | 1.684642764 | 0.078069112 | 0.90631545  |
| mitochondrion organization           | 1.640263344 | 0.078407064 | 0.904440717 |
| protein targeting                    | 1.490855346 | 0.08061147  | 0.908028952 |
| immune response                      | 1.366423944 | 0.085087549 | 0.91736219  |
| respiratory electron transport chain | 1.618097623 | 0.085463427 | 0.915743162 |
| secretion                            | 1.43687069  | 0.088390798 | 0.92045353  |
| chromatin organization               | 1.358386156 | 0.089840707 | 0.921443    |
| microtubule organizing center        |             |             |             |
| organization                         | 1.819745048 | 0.090811897 | 0.9213033   |
| bristle morphogenesis                | 1.819745048 | 0.090811897 | 0.9213033   |
| regulation of cell size              | 1.596522989 | 0.092906546 | 0.923702225 |
| mitotic spindle organization         | 1.322598205 | 0.095945892 | 0.927973975 |
| electron transport chain             | 1.520498084 | 0.097931893 | 0.929854815 |

# Table S4: Primer used for quantitative real-time PCR.

Primers specific for:

Sequences:

|               |                        |
|---------------|------------------------|
| gapdh1_forw   | AATCAAGGCTAAGGTCGAGGAG |
| gapdh1_rev    | TAACCGAACTCGTTGTCGTACC |
| 14-3-3-E_forw | CATGAACGATCTGCCACCAAC  |
| 14-3-3-E_rev  | CTCTTCGCTCAGTGTATCCAAC |
| dFOXO_forw    | GATCACTTTCCCGAGAGTCC   |
| dFOXO_rev     | GGAACTGGCATTGGATGAG    |
| mth_forw      | TAGACAACCGCGAAGAACAG   |
| mth_rev       | GAGTCACACGGTCAAAGTGG   |
| sod_forw      | CGGTTTTCTTCGAACAGGAG   |
| sod_rev       | TTGGTGTTGTCACCGAACTC   |
| sod2_forw     | CGTAAAATTTTCGCAAACCTGC |
| sod2_rev      | ATAGTCGTAGGGCAGCTTCG   |
| hsp67Ba_forw  | GACCATCGATAACTGCATCG   |
| hsp67Ba_rev   | TGTACTIONCGGATGAAGTGG  |
| E(z)_forw     | GCTTCAAATACGACTGCTTCC  |
| E(z)_rev      | AAGGCTTCAGTTCCGGATAG   |
| stau_forw     | GTCTTCAGCAGCAACAGCAG   |
| stau_rev      | CGTGGAGATGGTGATGATTC   |
| mnb_forw      | ATGGTTCAGGGATCGTCATC   |
| mnb_rev       | TGGACCCATAAGCGGACA     |
| nmdar2_forw   | TCATGGACAAGCATGGCATC   |
| nmdar2_rev    | TGTCTCCATCTCGGCGATTT   |
| atg1_forw     | AGCTGCACCATGAGAATGTG   |
| atg1_rev      | CACTCAGATAATCCGCCAAG   |

**Table S5: Aversive olfactory avoidance and shock reactivity of different mutant flies.** (All values are mean  $\pm$  SEM).

|                                                                                    | <u>Olfactory Avoidance</u> |                | Shock Reactivity |
|------------------------------------------------------------------------------------|----------------------------|----------------|------------------|
|                                                                                    | OCT                        | MCH            |                  |
| control ( <i>Atg7<sup>+/+</sup></i> )                                              | 70.3 $\pm$ 2.0             | 68.8 $\pm$ 3.0 | 72.6 $\pm$ 2.2   |
| <i>Atg7<sup>(d14)</sup>/CG5335<sup>(d30)</sup></i> ( <i>Atg7<sup>+/-</sup></i> )   | 66.2 $\pm$ 2.1             | 63.5 $\pm$ 2.4 | 63.3 $\pm$ 2.0   |
| <i>Atg7<sup>(d14)</sup>/Atg7<sup>(d77)</sup></i> ( <i>Atg7<sup>-/-</sup></i> )     | 57.7 $\pm$ 2.2             | 58.8 $\pm$ 2.5 | 66.6 $\pm$ 1.7   |
| control ( <i>Atg8a<sup>+/+</sup></i> )                                             | 59.4 $\pm$ 2.3             | 62.9 $\pm$ 2.9 | 57.3 $\pm$ 1.0   |
| <i>W<sup>1118</sup>; p(EP)Atg8a<sup>EP362</sup></i> ( <i>Atg8a<sup>-/-</sup></i> ) | 51.2 $\pm$ 3.1             | 50.8 $\pm$ 2.4 | 61.2 $\pm$ 2.1   |
